# Supplementary material for: Stereoselective synthesis of 1,3- and 1,4-dicarbonyl-alkenes from cyclopropenes in a catalytic zinc system
Source: Royal Society of Chemistry journal article supplement (doi:10.1039/d3qo00559c), 2023-01-01

## Supporting Information

# Stereoselective Synthesis of 1,3- and 1,4-Dicarbonyl-alkenes from Cyclopropenes in Catalytic Zinc System

Jiabin Han,<sup>a</sup> Yu Liu,<sup>a</sup> Xiaoyan Yang,<sup>b</sup> Xuheng Zhang,<sup>a</sup> Yuanhao Zhu,<sup>a</sup> Min Zhao,<sup>b</sup> Gefei Hao<sup>\*b</sup> and Yaojia Jiang<sup>\*a,b</sup>

<sup>a</sup> Institute of Advanced Synthesis, School of Chemistry and Molecular Engineering, Nanjing Tech University, Nanjing 211816, China.

<sup>b</sup> Laboratory Breeding Base of Green Pesticide and Agricultural Bioengineering, Key Laboratory of Green Pesticide and Agricultural Bioengineering Ministry of Education, Guizhou University, Huaxi District, Guiyang 550025, China.

### Table of Contents

|                                                                            |    |
|----------------------------------------------------------------------------|----|
| General methods -----                                                      | 3  |
| Optimization of reaction conditions -----                                  | 4  |
| General procedure for cyclopropenes and their spectral data -----          | 5  |
| General procedure for enamides and their spectral data -----               | 7  |
| General procedure for the synthesis of 1,n-Dicarbonyl-alkenes -----        | 12 |
| General procedure for 1,3-Dicarbonyl-alkenes and their spectral data ----- | 12 |
| General procedure for 1,4-Dicarbonyl-alkenes and their spectral data ----- | 24 |
| General procedure for derivative products and their spectral data -----    | 35 |
| Computational details -----                                                | 39 |
| NMR spectra for intermediate 1a-I -----                                    | 81 |
| NOESY NMR spectra of product -----                                         | 82 |
| NMR spectra for enamides -----                                             | 84 |
| NMR spectra for 1,3-Dicarbonyl-alkenes -----                               | 91 |

|                                              |     |
|----------------------------------------------|-----|
| NMR spectra for 1,4-Dicarbonyl-alkenes ----- | 111 |
| NMR spectra for derivative products -----    | 130 |

## General methods:

All reactions were carried out in flame or oven-dried glassware under nitrogen atmosphere with freshly distilled dry solvents under anhydrous conditions unless otherwise indicated. Flash column chromatography was performed with silica gel 60 (230 – 400 mesh). Chromatograms were visualized by fluorescence quenching with UV light at 254 nm or by staining with base solution of potassium permanganate and molybdate. NMR spectra were recorded at RT on 300 or 400 MHz Bruker spectrometers. The residual solvent signals were taken as the reference (0.00 ppm for  $^1\text{H}$  NMR spectra and 77.0 ppm for  $^{13}\text{C}$  NMR spectra in  $\text{CDCl}_3$ ). Chemical shift ( $\delta$ ) is reported in ppm, coupling constants ( $J$ ) are given in Hz. The following abbreviations classify the multiplicity: s = singlet, d = doublet, t = triplet, m = multiplet, dd = doublet of doublet, q = quartet and br = broad signal. HRMS (ESI) spectra were recorded on a Waters Q-Tof premier TM mass spectrometer.

**Table S1.** Optimization of reaction conditions<sup>a</sup>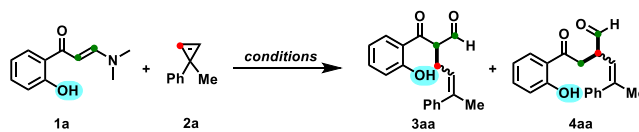

| entry           | catalyst                            | additive                          | solvent    | yield of <b>3aa</b> (%) <sup>b</sup> | yield of <b>4aa</b> (%) <sup>b</sup> |
|-----------------|-------------------------------------|-----------------------------------|------------|--------------------------------------|--------------------------------------|
| 1               | Rh <sub>2</sub> (OAc) <sub>4</sub>  | -                                 | DCE        | -                                    | 30 ( <i>E/Z</i> = 75:25)             |
| 2               | Cu(OH) <sub>2</sub>                 | -                                 | DCE        | -                                    | 5                                    |
| 3               | AgNO <sub>3</sub>                   | -                                 | DCE        | -                                    | 12 ( <i>E/Z</i> = 75:25)             |
| 4               | ZnBr <sub>2</sub>                   | -                                 | DCE        | -                                    | 33 ( <i>E/Z</i> = 94:6)              |
| 5               | ZnBr <sub>2</sub>                   | BF <sub>3</sub>                   | DCE        | 71 ( <i>E/Z</i> > 99:1)              | 8                                    |
| 6               | ZnCl <sub>2</sub>                   | BF <sub>3</sub>                   | DCE        | 66 ( <i>E/Z</i> > 99:1)              | -                                    |
| 7               | Zn(OAc) <sub>2</sub>                | BF <sub>3</sub>                   | DCE        | 46 ( <i>E/Z</i> > 99:1)              | -                                    |
| 8               | ZnBr <sub>2</sub>                   | BF <sub>3</sub>                   | DCM        | 68 ( <i>E/Z</i> > 99:1)              | -                                    |
| 9               | ZnBr <sub>2</sub>                   | BF <sub>3</sub>                   | ACN        | 10                                   | 20                                   |
| 10              | ZnBr <sub>2</sub>                   | BF <sub>3</sub>                   | THF        | -                                    | 15                                   |
| 11 <sup>c</sup> | ZnBr <sub>2</sub>                   | BF <sub>3</sub>                   | DCE        | 62 ( <i>E/Z</i> > 99:1)              | -                                    |
| 12 <sup>d</sup> | ZnBr <sub>2</sub>                   | BF <sub>3</sub>                   | DCE        | 80 ( <i>E/Z</i> > 99:1)              | -                                    |
| <b>13</b>       | <b>ZnBr<sub>2</sub></b>             | <b>BF<sub>3</sub><sup>e</sup></b> | DCE        | <b>87 (<i>E/Z</i> &gt; 99:1)</b>     | -                                    |
| 14              | ZnBr <sub>2</sub>                   | Sc(OTf) <sub>2</sub>              | DCE        | -                                    | 51 ( <i>E/Z</i> = 95:5)              |
| 15              | ZnBr <sub>2</sub>                   | Cu(OTf) <sub>2</sub>              | DCE        | -                                    | 34 ( <i>E/Z</i> = 95:5)              |
| 16              | ZnBr <sub>2</sub>                   | In(OTf) <sub>3</sub>              | DCE        | -                                    | 62 ( <i>E/Z</i> = 95:5)              |
| 17              | ZnBr <sub>2</sub> <sup>f</sup>      | -                                 | DCE        | -                                    | 80 ( <i>E/Z</i> = 95:5)              |
| <b>18</b>       | <b>ZnBr<sub>2</sub><sup>f</sup></b> | -                                 | <b>TCE</b> | -                                    | <b>83 (<i>E/Z</i> = 95:5)</b>        |
| 19              | ZnBr <sub>2</sub> <sup>f</sup>      | BF <sub>3</sub> <sup>e</sup>      | DCE        | 52 ( <i>E/Z</i> > 99:1)              | -                                    |
| 20 <sup>c</sup> | ZnBr <sub>2</sub> <sup>f</sup>      | -                                 | TCE        | -                                    | 52 ( <i>E/Z</i> = 95:5)              |

<sup>a</sup>Unless otherwise noted, reactions were performed as follows: **1a** (0.20 mmol, 1.0 equiv.), **2a** (0.60 mmol, 3.0 equiv.), catalyst (10 mol %) and additive (1.2 equiv.) were mixed with 2.0 mL solvent and reacted at room temperature (25 °C) under nitrogen atmosphere for about 10 hours.

<sup>b</sup>Isolated yields, *E/Z* ratio was determined by <sup>1</sup>H NMR analysis. <sup>c</sup>**1a/2a** = 1:2. <sup>d</sup>**1a/2a** = 1:4.

<sup>e</sup>BF<sub>3</sub>•Et<sub>2</sub>O (1.5 equiv.). <sup>f</sup>ZnBr<sub>2</sub> (1.0 equiv.). DCE = dichloroethane, DCM = dichloromethane, THF = tetrahydrofuran, TCE = tetrachloroethane.

General procedure for the synthesis of cyclopropenes<sup>1</sup>:

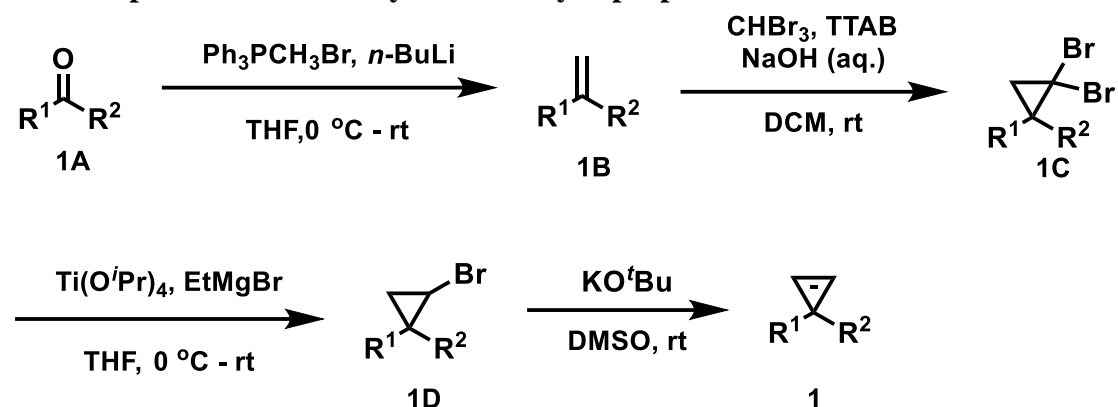

To a stirred solution of  $\text{Ph}_3\text{PCH}_3\text{Br}$  (100 mmol) in THF (150 mL) at 0 °C was added 1.6 M *n*-butyllithium (90 mmol) dropwise over 60 minutes. The reaction mixture was stirred for 2 hours at room temperature. Ketone **1A** (50 mmol) in THF (15 mL) was added dropwise to the cooled reaction mixture at 0 °C via cannular. The reaction was then stirred at room temperature for 24 - 48 hours, quenched with saturated  $\text{NH}_4\text{Cl}$  (40 mL), diluted with water (30 mL) and extracted with EtOAc (3 x 30 mL). The combined organic extracts were washed with brine (2 x 30 mL), dried over  $\text{MgSO}_4$  and concentrated under reduced pressure. The crude product was dissolved in hexane and triphenylphosphine oxide was filtered off. The filtrate solution was then concentrated under reduced pressure. The product **1B** was isolated by flash column chromatography (eluent: PE).

A solution of 10 M aqueous sodium hydroxide (200 mmol) was added to alkyltrimethylammonium bromide (2.0 g). To the stirring reaction mixture was added a solution of alkene **1B** (50 mmol) in DCM (2 mL). Bromoform (100 mmol) in DCM (10 mL) was added dropwise over 1 hour. The reaction was allowed to stir vigorously

<sup>1</sup> A. Parra, L. Amenós, M. Guisán-Ceinos, A. López, J. L. García Ruano and M. Tortosa, *J. Am. Chem. Soc.*, 2014, **136**, 15833-15836.

at 25 °C for 24 hours, after which the mixture was extracted with DCM (3 x 100 mL). The combined organic layers were washed with brine (2 x 100 mL), dried over MgSO<sub>4</sub> and concentrated under reduced pressure. The product **1C** was purified by flash column chromatography (eluent: PE)

A solution of ethylmagnesium bromide (75 mmol) was added dropwise over an hour to a stirring solution of 2, 2-dibromocyclopropane **1C** (50 mmol), Ti(O<sup>*i*</sup>Pr)<sub>4</sub> (5.0 mmol) and Et<sub>2</sub>O (50 mL) and the resulting mixture was stirred for 3 hours at 25 °C. The reaction was quenched by slow addition of water (20 mL) and 1 M HCl (30 mL), stirred for a further few minutes followed by the addition of Et<sub>2</sub>O (30 mL). The aqueous layer was washed with Et<sub>2</sub>O (3 x 20 mL), combined organic layers washed with saturated sodium bicarbonate (10 mL), brine (10 mL), dried over MgSO<sub>4</sub> and concentrated under reduced pressure. The crude oil was purified by flash column chromatography to afford **1D** (eluent: PE).

Potassium *tert*-butoxide (10 mmol) and dimethyl sulfoxide (10 mL) were heated to 55 °C and allowed to stir for 30 minutes at this temperature until the mixture was homogenous. The solution was then cooled to 25 °C. 2-Bromocyclopropane **1D** (5 mmol) in DMSO (5 mL) was added to the reaction mixture over 3 hours and allowed to stir at 25 °C for 20 hours. The reaction was quenched with brine (50 mL) and PE (50 mL) and layers partitioned. The aqueous layer was washed with PE (3 x 50 mL) and combined organic layers washed with brine (2 x 50 mL), dried over MgSO<sub>4</sub> and concentrated under reduced pressure. The product was purified by flash column chromatography (eluent: PE) to afford cyclopropenes **3a-3l**, **4f**, **4j**, **4k**.

The spectroscopic properties of these compounds were consistent with literature data: 3a – 3f, 4f;<sup>2</sup> 3g – 3i, 4j, 4k;<sup>3</sup> 3j – 3k.<sup>4</sup>

General procedure for the synthesis of enaminones<sup>5</sup>:

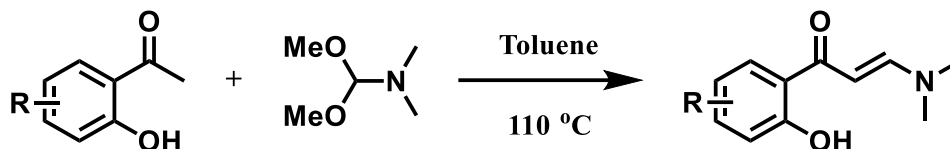

To a stirred solution of ketone (5.0 mmol, 1.0 equiv.) in toluene (5.0 mL), 1,1-dimethoxy-N,N-dimethylmethanamine (7.0 mmol, 1.4 equiv.) was added and stirred at 110 °C. After completion of the reaction (monitored by TLC), it was quenched with water, extracted with ethyl acetate and dried with anhydrous Na<sub>2</sub>SO<sub>4</sub>. Then the reaction mixture was concentrated under reduced pressure and purified by column chromatography (petroleum ether : ethyl acetate = 1 : 1) to give the desired product.

The spectroscopic properties of these compounds were consistent with literature data.<sup>6</sup>

**(E)-3-(Dimethylamino)-1-(2-hydroxyphenyl)prop-2-en-1-one (1a)<sup>6</sup>:**

<sup>2</sup> J. Chen, J. Han, T. Wu, J. Zhang, M. Li, Y. Xu, J. Zhang, Y. Jiao, Y. Yang and Y. Jiang, *Org. Chem. Front.*, 2022, **9**, 1820–1825.

<sup>3</sup> J. Chen, P. Guo, J. Zhang, J. Rong, W. Sun, Y. Jiang and T.-P. Loh, *Angew. Chem., Int. Ed.*, 2019, **58**, 12674–12679.

<sup>4</sup> J. Chen, J. Han, J. Zhang, L. Li, Z. Zhang, Y. Yang and Y. Jiang, *ACS Catal.*, 2022, **12**, 14748–14753.

<sup>5</sup> Y. Jiang, V. Y. K. Zhong, L. Emmanuvel and C.-M. Park, *Chem. Commun.*, 2012, **48**, 3133–3135.

<sup>6</sup> M. Akram, S. Bera and N. Patil, *Chem. Commun.*, 2016, **52**, 12306–12309.

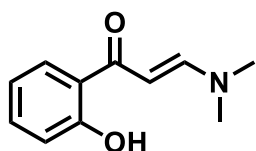

Purification by column chromatography (TLC  $R_f = 0.5$ ) on silica gel using EtOAc/PE (1:1) as the eluent the desired product **1a** as yellow solid in 89% yield (851.0mg);  $^1\text{H}$  NMR (400 MHz,  $\text{CDCl}_3$ )  $\delta$  13.96 (s, 1H), 7.87 (d,  $J = 12.2$  Hz, 1H), 7.70 (dd,  $J_1 = 8.0$  Hz,  $J_2 = 1.1$  Hz, 1H), 7.39 - 7.32 (m, 1H), 6.96 - 6.89 (m, 1H), 6.85 - 6.78 (m, 1H), 5.78 (d,  $J = 12.2$  Hz, 1H), 3.20 (s, 3H), 2.97 (s, 3H).

**(E)-3-(Dimethylamino)-1-(2-hydroxy-5-methylphenyl)prop-2-en-1-one (1b)<sup>6</sup>:**

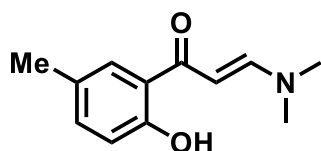

Purification by column chromatography (TLC  $R_f = 0.3$ ) on silica gel using EtOAc/PE (1:1) as the eluent the desired product **1b** as yellow solid in 92% yield (944.2mg);  $^1\text{H}$  NMR (400 MHz,  $\text{CDCl}_3$ )  $\delta$  13.73 (s, 1H), 7.88 (d,  $J = 12.1$  Hz, 1H), 7.47 (s, 1H), 7.16 (d,  $J = 8.3$  Hz, 1H), 6.84 (d,  $J = 8.3$  Hz, 1H), 5.78 (d,  $J = 12.3$  Hz, 1H), 3.19 (s, 3H), 2.99 (s, 3H), 2.30 (s, 3H).

**(E)-3-(Dimethylamino)-1-(5-fluoro-2-hydroxyphenyl)prop-2-en-1-one (1c)<sup>6</sup>:**

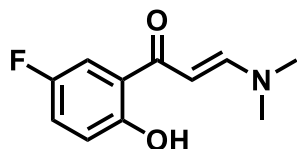

Purification by column chromatography (TLC  $R_f = 0.5$ ) on silica gel using EtOAc/PE (1:1) as the eluent the desired product **1c** as yellow solid in 67% yield (700.9mg);  $^1\text{H}$  NMR (400 MHz,  $\text{CDCl}_3$ )  $\delta$  14.04 (s, 1H), 8.00 (d,  $J = 12.1$  Hz, 1H), 7.87 (d,  $J = 2.3$  Hz, 1H), 7.51 (dd,  $J_1 = 8.8$  Hz,  $J_2 = 2.4$  Hz, 1H), 6.93 (d,  $J = 8.8$  Hz, 1H), 5.77 (d,  $J = 12.0$  Hz, 1H), 3.32 (s, 3H), 3.10 (s, 3H).

**(E)-3-(Dimethylamino)-1-(4-fluoro-2-hydroxyphenyl)prop-2-en-1-one (1c')<sup>6</sup>:**



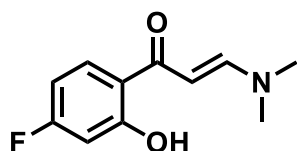

Purification by column chromatography (TLC  $R_f = 0.5$ ) on silica gel using EtOAc/PE (1:1) as the eluent the desired product **1c'** as yellow solid in 76% yield (795.0mg);  $^1\text{H}$  NMR (400 MHz,  $\text{CDCl}_3$ )  $\delta$  13.93 (s, 1H), 7.90 (d,  $J = 12.0$  Hz, 1H), 7.62 (d,  $J = 2.6$  Hz, 1H), 7.28 (dd,  $J_1 = 9.0$  Hz,  $J_2 = 2.6$  Hz, 1H), 6.87 (d,  $J = 8.9$  Hz, 1H), 5.67 (d,  $J = 12.1$  Hz, 1H), 3.21 (s, 3H), 3.00 (s, 3H).

**(E)-1-(5-Chloro-2-hydroxyphenyl)-3-(dimethylamino)prop-2-en-1-one (1d)<sup>6</sup>:**

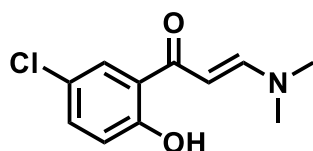

Purification by column chromatography (TLC  $R_f = 0.5$ ) on silica gel using EtOAc/PE (1:1) as the eluent the desired product **1d** as yellow solid in 83% yield (936.5mg);  $^1\text{H}$  NMR (400 MHz,  $\text{CDCl}_3$ )  $\delta$  13.93 (s, 1H), 7.90 (d,  $J = 12.1$  Hz, 1 H), 7.62 (d,  $J = 2.4$  Hz, 1H), 7.28 (dd,  $J_1 = 8.8$  Hz,  $J_2 = 2.4$  Hz, 1H), 6.87 (d,  $J = 8.8$  Hz, 1H), 5.68 (d,  $J = 12.1$  Hz, 1H), 3.21 (s, 3H), 3.00 (s, 3H).

**(E)-1-(5-Bromo-2-hydroxyphenyl)-3-(dimethylamino)prop-2-en-1-one (1e)<sup>6</sup>:**

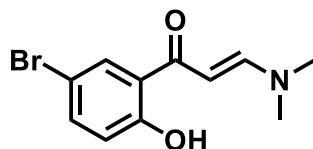

Purification by column chromatography (TLC  $R_f = 0.5$ ) on silica gel using EtOAc/PE (1:1) as the eluent the desired product **1e** as yellow solid in 84% yield (1134.5mg);  $^1\text{H}$  NMR (400 MHz,  $\text{CDCl}_3$ )  $\delta$  13.94 (s, 1H), 7.89 (d,  $J = 12.1$  Hz, 1H), 7.76 (d,  $J = 2.4$  Hz, 1H), 7.41 (dd,  $J_1 = 8.8$  Hz,  $J_2 = 2.3$  Hz, 1H), 6.83 (d,  $J = 8.8$  Hz, 1H), 5.67 (d,  $J = 12.1$  Hz, 1H), 3.21(s, 3H), 3.00(s, 3H).

**(E)-3-(Dimethylamino)-1-(2-hydroxy-5-methoxyphenyl)prop-2-en-1-one (1f)<sup>6</sup>:**

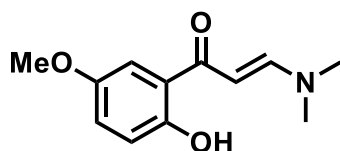

Purification by column chromatography (TLC  $R_f = 0.3$ ) on silica gel using EtOAc/PE (1:1) as the eluent the desired product **1f** as yellow solid in 72% yield (796.5mg);  $^1\text{H}$  NMR (400 MHz,  $\text{CDCl}_3$ )  $\delta$  14.49 (s, 1H), 7.84 (d,  $J = 12.0$  Hz, 1H), 7.60 (d,  $J = 8.7$  Hz, 1H), 6.50 – 6.30 (m, 2H), 5.68 (d,  $J = 12.0$  Hz, 1H), 3.81 (s, 3H), 3.17 (s, 3H), 2.95 (s, 3H).

**(E)-3-(Dimethylamino)-1-(2-hydroxy-5-nitrophenyl)prop-2-en-1-one (1g)<sup>6</sup>:**

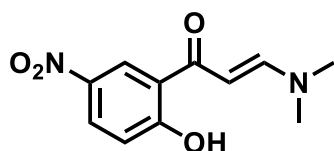

Purification by column chromatography (TLC  $R_f = 0.5$ ) on silica gel using EtOAc/PE (1:1) as the eluent the desired product **1g** as yellow solid in 80% yield (944.9mg);  $^1\text{H}$  NMR (400 MHz,  $\text{CDCl}_3$ )  $\delta$  15.23 (s, 1 H), 8.63 (d,  $J = 2.8$  Hz, 1H), 8.22 (dd,  $J_1 = 9.2$  Hz,  $J_2 = 2.7$  Hz, 1H), 7.98 (d,  $J = 11.9$  Hz, 1H), 6.98 (d,  $J = 9.2$  Hz, 1H), 5.79 (d,  $J = 12.0$  Hz, 1H), 3.27 (s, 3H), 3.07 (s, 3H).

**(E)-3-(3-(Dimethylamino)acryloyl)-4-hydroxybenzonitrile (1h)<sup>6</sup>:**

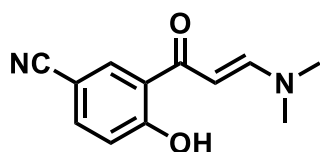

Purification by column chromatography (TLC  $R_f = 0.4$ ) on silica gel using EtOAc/PE (1:1) as the eluent the desired product **1h** as yellow solid in 70% yield (7456.8mg);  $^1\text{H}$  NMR (400 MHz,  $\text{CDCl}_3$ )  $\delta$  14.82 (s, 1 H), 7.99 (d,  $J = 2.0$  Hz, 1 H), 7.94 (d,  $J = 12.0$  Hz, 1H), 7.56 (dd,  $J_1 = 8.7$  Hz,  $J_2 = 1.8$  Hz, 1H), 6.96 (d,  $J = 8.7$  Hz, 1H), 5.68 (d,  $J = 11.9$  Hz, 1H), 3.25 (s, 3H), 3.03 (s, 3H).

**(E)-3-(Dimethylamino)-1-(1-hydroxynaphthalen-2-yl)prop-2-en-1-one (1i)<sup>6</sup>:**

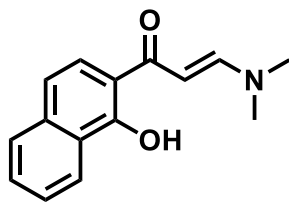

Purification by column chromatography (TLC  $R_f = 0.4$ ) on silica gel using EtOAc/PE (1:1) as the eluent the desired product **1i** as yellow solid in 65% yield (784.2mg);  $^1\text{H}$  NMR (400 MHz,  $\text{CDCl}_3$ )  $\delta$  15.66 (s, 1 H), 8.44 (d,  $J = 8.3$  Hz, 1H), 7.96 (d,  $J = 12.1$  Hz, 1H), 7.73 (d,  $J = 8.1$  Hz, 1H), 7.68 (d,  $J = 8.8$  Hz, 1H), 7.58 - 7.54 (m, 1H), 7.51 - 7.46 (m, 1H), 7.21 (d,  $J = 8.9$  Hz, 1H), 5.85 (d,  $J = 12.1$  Hz, 1H), 3.22 (s, 3H), 3.01 (s, 3H).

***tert*-butyl-(*E*)-(2-(3-(dimethylamino)acryloyl)phenyl)carbamate (**1j**)<sup>7</sup>:**

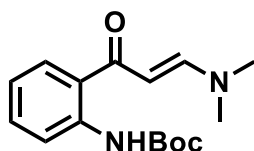

Purification by column chromatography (TLC  $R_f = 0.4$ ) on silica gel using EtOAc/PE (1:4) as the eluent the desired product **1j** as yellow oil in 75% yield (1088.9mg);  $^1\text{H}$  NMR (400 MHz,  $\text{CDCl}_3$ )  $\delta$  10.95 (s, 1 H), 8.31 (dd,  $J_1 = 8.5$  Hz,  $J_2 = 1.2$  Hz, 1H), 7.73 (d,  $J = 12.2$  Hz, 1H), 7.68 (dd,  $J_1 = 7.9$  Hz,  $J_2 = 1.6$  Hz, 1H), 7.36 (ddd,  $J_1 = 8.7$  Hz,  $J_2 = 7.3$  Hz,  $J_3 = 1.6$  Hz, 1H), 6.96 - 6.92 (m, 1H), 5.62 (d,  $J = 12.2$  Hz, 1H), 3.11 (s, 3H), 2.88 (s, 3H), 1.48 (s, 3H).

**(*E*)-3-(dimethylamino)-1-(2-(dimethylamino)phenyl)prop-2-en-1-one (**1k**):**

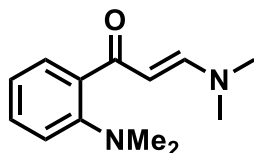

Purification by column chromatography (TLC  $R_f = 0.2$ ) on silica gel using EtOAc as the eluent the desired product **1k** as yellow oil in 42% yield (458.4mg);  $^1\text{H}$  NMR (400

<sup>7</sup> J. Jousot, A. Schoenfelder, L. Larquetoux, M. Nicolas, J. Suffert and G. Blond, *Synthesis*, 2016, **48(19)**: 3364–3372.

MHz, CDCl<sub>3</sub>)  $\delta$  732. (s, 1 H), 7.317.16 (m, 2H), 6.866.77 (m, 2H), 5.48 (d,  $J$  = 12.2 Hz, 1H), 3.012.74 (m, 12H); <sup>13</sup>C NMR (100 MHz, CDCl<sub>3</sub>)  $\delta$  150.2, 129.5, 129.3, 119.0, 115.9, 43.4; HRMS (ESI)  $m/z$  [M+H]<sup>+</sup>: Calcd for C<sub>13</sub>H<sub>19</sub>N<sub>2</sub>O: 219.1497. Found: 219.1493.

**General procedure for the synthesis of 1,*n*-Dicarbonyl-alkenes:**

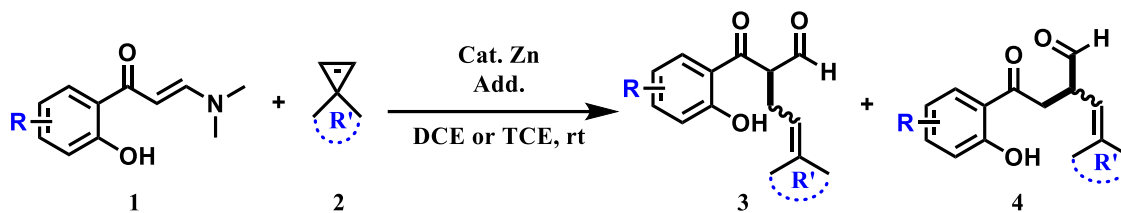

**1,3-Dicarbonyl-alkenes:** A mixture of **1** (0.2 mmol, 1.0 equiv.), **2** (0.6 mmol, 3.0 equiv.), BF<sub>3</sub>·Et<sub>2</sub>O (0.3 mmol, 1.5 equiv.) and ZnBr<sub>2</sub> (0.02 mmol, 10 mol %) was dissolved in DCE (2.0 mL) in a Schlenk tube under N<sub>2</sub> protection. The mixture was stirred until the **1** was consumed completely about 10 hours at room temperature. Then the reaction mixture was diluted with saturated NH<sub>4</sub>Cl and extracted with DCM. The organic phase dried over MgSO<sub>4</sub> and concentrated under reduced pressure. The product was purified by column chromatography to give the desired product **3**.

**1,4-Dicarbonyl-alkenes:** A mixture of **1** (0.2 mmol, 1.0 equiv.), **2** (0.6 mmol, 3.0 equiv.) and ZnBr<sub>2</sub> (0.2 mmol, 1.0 equiv.) was dissolved in TCE (2.0 mL) in a Schlenk tube under N<sub>2</sub> protection. The mixture was stirred until the **1** was consumed completely about 24 hours at room temperature. Then the reaction mixture was concentrated under reduced pressure and purified by column chromatography to give the desired product **4**.

**(*E*)-2-(2-Hydroxybenzoyl)-5-phenylhex-4-enal (3aa):**

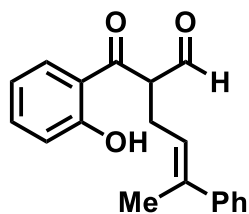

The title compound was prepared according to the general procedure. Purification by column chromatography (TLC  $R_f$  = 0.5) on silica gel using EtOAc /PE (2:8) as the eluent the desired product **3aa** as yellow oil in 87% yield (51.2 mg,  $E/Z > 99:1$ );  $^1\text{H}$  NMR (400 MHz,  $\text{CDCl}_3$ )  $\delta$  12.11 (s, 1H), 9.84 (s, 1H), 7.83 (dd,  $J_1 = 8.1$  Hz,  $J_2 = 1.6$  Hz, 1H), 7.48 (ddd,  $J_1 = 18.7$  Hz,  $J_2 = 7.3$  Hz,  $J_3 = 1.6$  Hz, 1H), 7.34 – 7.26 (m, 5H), 6.99 (dd,  $J_1 = 8.5$  Hz,  $J_2 = 1.1$  Hz, 1H), 6.90 (ddd,  $J_1 = 8.2$  Hz,  $J_2 = 7.1$  Hz,  $J_3 = 1.1$  Hz, 1H), 5.67 (dd,  $J_1 = 10.2$  Hz,  $J_2 = 1.3$  Hz, 1H), 4.93 (td,  $J_1 = 9.6$  Hz,  $J_2 = 9.6$  Hz,  $J_3 = 4.4$  Hz, 1H), 3.37 (dd,  $J_1 = 18.5$  Hz,  $J_2 = 9.0$  Hz, 1H), 2.72 (dd,  $J_1 = 18.5$  Hz,  $J_2 = 4.4$  Hz, 1H), 2.27 (d,  $J = 1.2$  Hz, 3H);  $^{13}\text{C}$  NMR (100 MHz,  $\text{CDCl}_3$ )  $\delta$  205.0, 199.8, 163.0, 142.1, 138.5, 136.7, 130.0, 128.3, 127.6, 125.8, 124.1, 119.0, 118.6, 118.6, 45.4, 41.5, 16.5; HRMS (ESI)  $m/z$   $[\text{M}+\text{H}]^+$ : Calcd for  $\text{C}_{19}\text{H}_{19}\text{O}_3$ : 294.1334. Found: 294.1342.

**(E)-2-(2-Hydroxy-5-methylbenzoyl)-5-phenylhex-4-enal (3ba):**

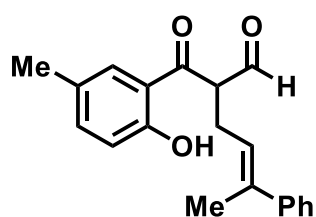

The title compound was prepared according to the general procedure. Purification by column chromatography (TLC  $R_f$  = 0.4) on silica gel using EtOAc /PE (2:8) as the eluent the desired product **3ba** as yellow oil in 92% yield (56.7 mg,  $E/Z > 99:1$ );  $^1\text{H}$  NMR (400 MHz,  $\text{CDCl}_3$ )  $\delta$  11.94 (s, 1H), 9.84 (s, 1H), 7.61 (d,  $J = 2.2$  Hz, 1H), 7.34 – 7.25 (m, 6H), 6.90 (d,  $J = 8.5$  Hz, 1H), 5.65 (dd,  $J_1 = 10.3$  Hz,  $J_2 = 1.4$  Hz, 1H), 4.93 (ddd,  $J_1 = 10.3$  Hz,  $J_2 = 8.9$  Hz,  $J_3 = 4.6$  Hz, 1H), 3.36 (ddd,  $J_1 = 18.5$  Hz,  $J_2 = 9.0$  Hz,  $J_3 = 0.7$  Hz, 1H), 2.72 (dd,  $J_1 = 18.5$  Hz,  $J_2 = 4.6$  Hz, 1H), 2.29 (s, 3H), 2.29

(d,  $J = 1.4$  Hz, 3H);  $^{13}\text{C}$  NMR (100 MHz,  $\text{CDCl}_3$ )  $\delta$  204.8, 199.9, 160.9, 142.2, 138.3, 137.7, 129.7, 128.3, 127.9, 127.6, 125.8, 124.2, 118.3, 118.1, 45.4, 41.4, 20.7, 16.5; HRMS (ESI)  $m/z$   $[\text{M}+\text{H}]^+$ : Calcd for  $\text{C}_{20}\text{H}_{21}\text{O}_3$ : 309.1491. Found: 309.1491.

**(E)-2-(4-Fluoro-2-hydroxybenzoyl)-5-phenylhex-4-enal (3ca):**

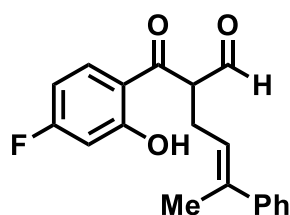

The title compound was prepared according to the general procedure. Purification by column chromatography (TLC  $R_f = 0.5$ ) on silica gel using EtOAc /PE (2:8) as the eluent the desired product **3ca** as yellow oil in 62% yield (38.7 mg,  $E/Z > 99:1$ );  $^1\text{H}$  NMR (400 MHz,  $\text{CDCl}_3$ )  $\delta$  12.43 (s, 1H), 9.83 (s, 1H), 7.84 (dd,  $J_1 = 9.0$  Hz,  $J_2 = 6.4$  Hz, 1H), 7.32 – 7.26 (m, 5H), 6.68 – 6.60 (m, 2H), 5.65 (dd,  $J_1 = 10.2$  Hz,  $J_2 = 1.4$  Hz, 1H), 4.88 – 4.82 (m, 1H), 3.38 (dd,  $J_1 = 18.6$  Hz,  $J_2 = 9.3$  Hz, 1H), 2.71 (dd,  $J_1 = 18.6$  Hz,  $J_2 = 4.3$  Hz, 1H), 2.26 (d,  $J = 1.4$  Hz, 3H);  $^{13}\text{C}$  NMR (100 MHz,  $\text{CDCl}_3$ )  $\delta$  203.9, 199.7, 167.5 (d,  $J = 257.5$  Hz), 165.6 (d,  $J = 257.5$  Hz), 142.0, 138.7, 132.4 (d,  $J = 11.8$  Hz), 128.4, 127.7, 125.8, 123.9, 115.7, 107.4 (d,  $J = 22.7$  Hz), 105.2 (d,  $J = 23.5$  Hz), 45.4, 41.6, 16.5.;  $^{19}\text{F}$  NMR (376Hz,  $\text{CDCl}_3$ )  $\delta$  -123.5; HRMS (ESI)  $m/z$   $[\text{M}+\text{H}]^+$ : Calcd for  $\text{C}_{19}\text{H}_{18}\text{FO}_3$ : 313.1240. Found: 313.1234.

**(E)-2-(5-Chloro-2-hydroxybenzoyl)-5-phenylhex-4-enal (3da):**

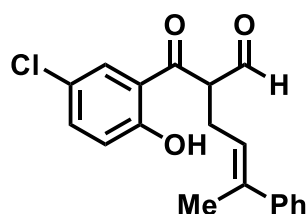

The title compound was prepared according to the general procedure. Purification by column chromatography (TLC  $R_f = 0.5$ ) on silica gel using EtOAc /PE (2:8) as the eluent the desired product **3da** as yellow oil in 84% yield (55.2 mg,  $E/Z > 99:1$ );  $^1\text{H}$

NMR (400 MHz, CDCl<sub>3</sub>)  $\delta$  11.97 (s, 1H), 9.83 (s, 1H), 7.79 (d,  $J = 2.5$  Hz, 1H), 7.43 – 7.40 (m, 1H), 7.35 – 7.27 (m, 5H), 6.95 (d,  $J = 8.95$  Hz, 1H), 5.62 – 5.58 (m, 1H), 4.84 (ddd,  $J_1 = 10.4$  Hz,  $J_2 = 9.3$  Hz,  $J_3 = 4.3$  Hz, 1H), 3.40 (dd,  $J_1 = 18.7$  Hz,  $J_2 = 9.3$  Hz, 1H), 2.73 (dd,  $J_1 = 18.7$  Hz,  $J_2 = 4.2$  Hz, 1H), 2.3 (d,  $J = 1.4$  Hz, 3H); <sup>13</sup>C NMR (100 MHz, CDCl<sub>3</sub>)  $\delta$  204.2, 199.5, 161.4, 142.0, 139.2, 136.4, 129.3, 128.4, 127.7, 125.8, 123.6, 123.4, 120.2, 119.0, 45.4, 41.6, 16.5; HRMS (ESI)  $m/z$  [M+H]<sup>+</sup>: Calcd for C<sub>19</sub>H<sub>18</sub>ClO<sub>3</sub>: 329.0944. Found: 329.0937.

**(E)-2-(5-Bromo-2-hydroxybenzoyl)-5-phenylhex-4-enal (3ea):**

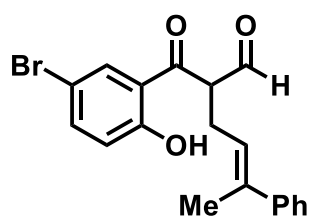

The title compound was prepared according to the general procedure. Purification by column chromatography (TLC R<sub>f</sub> = 0.4) on silica gel using EtOAc /PE (2:8) as the eluent the desired product **3ea** as yellow oil in 95% yield (70.9 mg,  $E/Z > 99:1$ ); <sup>1</sup>H NMR (400 MHz, CDCl<sub>3</sub>)  $\delta$  11.97 (s, 1H), 9.83 (s, 1H), 7.95 (d,  $J = 2.4$  Hz, 1H), 7.54 (dd,  $J_1 = 8.9$  Hz,  $J_2 = 2.4$  Hz, 1H), 7.33 – 7.26 (m, 5H), 6.90 (d,  $J = 8.9$  Hz, 1H), 5.59 (dd,  $J_1 = 10.4$  Hz,  $J_2 = 1.5$  Hz, 1H), 4.87 – 4.81 (m, 1H), 3.40 (dd,  $J_1 = 18.7$  Hz,  $J_2 = 9.2$  Hz, 1H), 2.73 (dd,  $J_1 = 18.7$  Hz,  $J_2 = 4.2$  Hz, 1H), 2.3 (d,  $J = 1.3$  Hz, 3H); <sup>13</sup>C NMR (100 MHz, CDCl<sub>3</sub>)  $\delta$  204.1, 199.5, 161.8, 142.1, 139.2, 139.1, 132.4, 128.4, 127.8, 125.8, 123.4, 120.6, 119.7, 110.5, 45.3, 41.7, 16.6; HRMS (ESI)  $m/z$  [M+H]<sup>+</sup>: Calcd for C<sub>19</sub>H<sub>18</sub>BrO<sub>3</sub>: 373.0439. Found: 373.0443.

**(E)-2-(2-Hydroxy-5-methoxybenzoyl)-5-phenylhex-4-enal (3fa):**

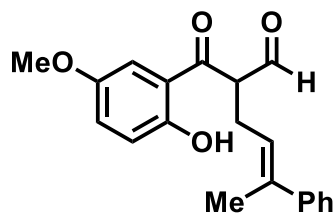

The title compound was prepared according to the general procedure. Purification by column chromatography (TLC  $R_f$  = 0.6) on silica gel using EtOAc /PE (2:8) as the eluent the desired product **3fa** as yellow oil in 28% yield (18.2 mg,  $E/Z$  > 99:1);  $^1\text{H}$  NMR (400 MHz,  $\text{CDCl}_3$ )  $\delta$  12.59 (s, 1H), 9.84 (s, 1H), 7.72 (d,  $J$  = 8.7 Hz, 1H), 7.34 – 7.26 (m, 5H), 6.46 – 6.42 (m, 2H), 5.69 (dd,  $J_1$  = 10.1 Hz,  $J_2$  = 1.5 Hz, 1H), 4.83 (ddd,  $J_1$  = 10.2 Hz,  $J_2$  = 8.8 Hz,  $J_3$  = 4.6 Hz, 1H), 3.83 (s, 3H), 3.32 (dd,  $J_1$  = 18.3 Hz,  $J_2$  = 8.8 Hz, 1H), 2.69 (dd,  $J_1$  = 18.3 Hz,  $J_2$  = 4.6 Hz, 1H), 2.25 (d,  $J$  = 1.4 Hz, 3H);  $^{13}\text{C}$  NMR (100 MHz,  $\text{CDCl}_3$ )  $\delta$  202.9, 199.9, 166.3, 166.0, 142.3, 138.0, 131.6, 128.3, 127.6, 125.8, 124.6, 112.7, 107.9, 101.0, 55.6, 45.3, 41.3, 16.4; HRMS (ESI)  $m/z$   $[\text{M}+\text{H}]^+$ : Calcd for  $\text{C}_{20}\text{H}_{21}\text{O}_4$ : 325.1440. Found: 325.1444.

**(E)-2-(2-Hydroxybenzoyl)-5-(p-tolyl)hex-4-enal (3ab):**

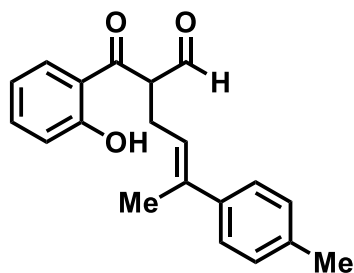

The title compound was prepared according to the general procedure. Purification by column chromatography (TLC  $R_f$  = 0.4) on silica gel using EtOAc /PE (2:8) as the eluent the desired product **3ab** as yellow oil in 77% yield (47.5 mg,  $E/Z$  > 99:1);  $^1\text{H}$  NMR (400 MHz,  $\text{CDCl}_3$ )  $\delta$  12.12 (s, 1H), 9.84 (s, 1H), 7.83 (dd,  $J_1$  = 8.1 Hz,  $J_2$  = 1.6 Hz, 1H), 7.47 (ddd,  $J_1$  = 8.6 Hz,  $J_2$  = 7.1 Hz,  $J_3$  = 1.6 Hz, 1H), 7.26 – 7.21 (m, 2H), 7.12 – 7.09 (m, 2H), 6.99 (dd,  $J_1$  = 8.4 Hz,  $J_2$  = 1.2 Hz, 1H), 6.90 (ddd,  $J_1$  = 8.2 Hz,  $J_2$  = 7.2 Hz,  $J_3$  = 1.2 Hz, 1H), 5.64 (dd,  $J_1$  = 10.2 Hz,  $J_2$  = 1.4 Hz, 1H), 4.92 (ddd,  $J_1$  = 10.2 Hz,  $J_2$  = 9.0 Hz,  $J_3$  = 4.5 Hz, 1H), 3.36 (ddd,  $J_1$  = 18.5 Hz,  $J_2$  = 9.0 Hz,  $J_3$  = 0.7



Hz, 1H), 2.74 – 2.68 (m, 1H), 2.32 (s, 3H), 2.25 (d,  $J = 1.4$  Hz, 3H);  $^{13}\text{C}$  NMR (100 MHz,  $\text{CDCl}_3$ )  $\delta$  205.1, 199.9, 163.0, 139.2, 138.3, 137.5, 136.6, 130.0, 129.0, 125.7, 123.2, 119.0, 118.6, 118.5, 45.4, 41.5, 21.0, 16.4; HRMS (ESI)  $m/z$   $[\text{M}+\text{H}]^+$ : Calcd for  $\text{C}_{20}\text{H}_{21}\text{O}_3$ : 309.1491. Found: 309.1482.

**(E)-5-(4-Fluorophenyl)-2-(2-hydroxybenzoyl)hex-4-enal (3ac):**

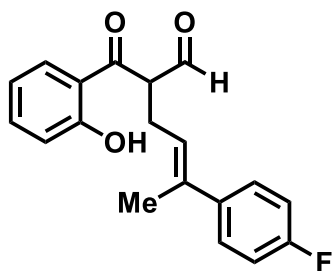

The title compound was prepared according to the general procedure. Purification by column chromatography (TLC  $R_f = 0.4$ ) on silica gel using EtOAc /PE (2:8) as the eluent the desired product **3ac** as yellow oil in 78% yield (48.7 mg,  $E/Z > 99:1$ );  $^1\text{H}$  NMR (400 MHz,  $\text{CDCl}_3$ )  $\delta$  12.09 (s, 1H), 9.83 (s, 1H), 7.82 (dd,  $J_1 = 8.1$  Hz,  $J_2 = 1.6$  Hz, 1H), 7.48 (ddd,  $J_1 = 8.6$  Hz,  $J_2 = 7.2$  Hz,  $J_3 = 1.7$  Hz, 1H), 7.30 – 7.26 (m, 2H), 7.01 – 6.95 (m, 3H), 6.91 (ddd,  $J_1 = 8.2$  Hz,  $J_2 = 7.2$  Hz,  $J_3 = 1.2$  Hz, 1H), 5.62 – 5.59 (m, 1H), 4.92 (ddd,  $J_1 = 10.2$  Hz,  $J_2 = 8.8$  Hz,  $J_3 = 4.6$  Hz, 1H), 3.35 (dd,  $J_1 = 18.5$  Hz,  $J_2 = 8.8$  Hz, 1H), 2.72 (dd,  $J_1 = 18.5$  Hz,  $J_2 = 4.5$  Hz, 1H), 2.24 (d,  $J_1 = 1.4$  Hz, 3H);  $^{13}\text{C}$  NMR (100 MHz,  $\text{CDCl}_3$ )  $\delta$  205.0, 199.6, 163.5, 163.1, 161.1, 138.3 (d,  $J = 3.4$  Hz), 137.6, 136.7, 129.9, 127.4 (d,  $J = 8.2$  Hz), 124.1, 118.9 (d,  $J = 35.2$  Hz), 118.5, 115.1 (d,  $J = 21.5$  Hz), 45.5, 41.4, 16.6;  $^{19}\text{F}$  NMR (376Hz,  $\text{CDCl}_3$ )  $\delta$  -114.6; HRMS (ESI)  $m/z$   $[\text{M}+\text{H}]^+$ : Calcd for  $\text{C}_{19}\text{H}_{18}\text{FO}_3$ : 313.1240. Found: 313.1230.

**(E)-5-(4-Chlorophenyl)-2-(2-hydroxybenzoyl)hex-4-enal (3ad):**

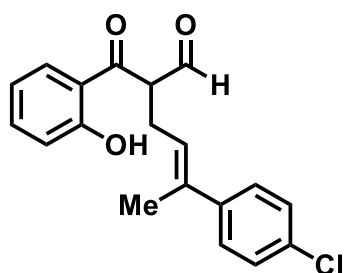

The title compound was prepared according to the general procedure. Purification by column chromatography (TLC  $R_f$  = 0.5) on silica gel using EtOAc /PE (2:8) as the eluent the desired product **3ad** as yellow oil in 87% yield (57.2 mg,  $E/Z$  > 99:1);  $^1\text{H}$  NMR (400 MHz,  $\text{CDCl}_3$ )  $\delta$  12.10 (s, 1H), 9.84 (s, 1H), 7.82 (dd,  $J_1$  = 8.1 Hz,  $J_2$  = 1.7 Hz, 1H), 7.50 (ddd,  $J_1$  = 8.6 Hz,  $J_2$  = 7.2 Hz,  $J_3$  = 1.2 Hz, 1H), 7.27 – 7.26 (m, 4H), 7.01 (dd,  $J_1$  = 8.4 Hz,  $J_2$  = 1.2 Hz, 1H), 6.92 (ddd,  $J_1$  = 8.2 Hz,  $J_2$  = 7.1 Hz,  $J_3$  = 1.2 Hz, 1H), 5.66 (dd,  $J_1$  = 10.2 Hz,  $J_2$  = 1.4 Hz, 1H), 4.94 (ddd,  $J_1$  = 10.2 Hz,  $J_2$  = 8.9 Hz,  $J_3$  = 4.6 Hz, 1H), 3.38 (dd,  $J_1$  = 18.5 Hz,  $J_2$  = 8.9 Hz, 1H), 2.74 (dd,  $J_1$  = 18.6 Hz,  $J_2$  = 4.6 Hz, 1H), 2.25 (d,  $J$  = 1.4 Hz, 3H);  $^{13}\text{C}$  NMR (100 MHz,  $\text{CDCl}_3$ )  $\delta$  204.8, 199.5, 163.0, 140.6, 137.4, 136.7, 133.4, 129.9, 128.4, 127.1, 124.6, 119.1, 118.7, 118.5, 45.4, 41.4, 16.4; HRMS (ESI)  $m/z$   $[\text{M}+\text{H}]^+$ : Calcd for  $\text{C}_{19}\text{H}_{18}\text{ClO}_3$ : 329.0944. Found: 329.0940.

**(E)-5-(4-Bromophenyl)-2-(2-hydroxybenzoyl)hex-4-enal (3ae):**

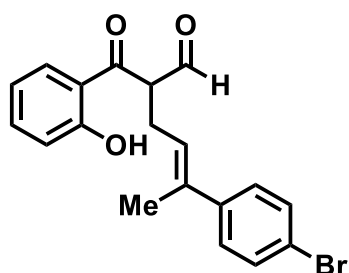

The title compound was prepared according to the general procedure. Purification by column chromatography (TLC  $R_f$  = 0.4) on silica gel using EtOAc /PE (2:8) as the eluent the desired product **3ae** as yellow oil in 94% yield (70.2 mg,  $E/Z$  > 99:1);  $^1\text{H}$  NMR (400 MHz,  $\text{CDCl}_3$ )  $\delta$  12.08 (s, 1H), 9.83 (s, 1H), 7.81 (dd,  $J_1$  = 8.1 Hz,  $J_2$  = 1.6 Hz, 1H), 7.48 (ddd,  $J_1$  = 8.7 Hz,  $J_2$  = 7.2 Hz,  $J_3$  = 1.6 Hz, 1H), 7.43 – 7.39 (m, 2H), 7.20 – 7.16 (m, 2H), 7.00 (dd,  $J_1$  = 8.4 Hz,  $J_2$  = 1.2 Hz, 1H), 6.91 (ddd,  $J_1$  = 8.2 Hz,  $J_2$

= 7.2 Hz,  $J_3 = 1.2$  Hz, 1H), 5.66 (dd,  $J_1 = 10.2$  Hz,  $J_2 = 1.4$  Hz, 1H), 4.92 (ddd,  $J_1 = 10.2$  Hz,  $J_2 = 8.9$  Hz,  $J_3 = 4.6$  Hz, 1H), 3.36 (dd,  $J_1 = 18.5$  Hz,  $J_2 = 8.9$  Hz, 1H), 2.72 (dd,  $J_1 = 18.5$  Hz,  $J_2 = 4.6$  Hz, 1H), 2.22 (d,  $J = 1.4$  Hz, 3H);  $^{13}\text{C}$  NMR (100 MHz,  $\text{CDCl}_3$ )  $\delta$  204.8, 199.5, 163.0, 141.0, 137.5, 136.7, 131.4, 129.9, 127.4, 124.7, 121.6, 119.1, 118.7, 118.5, 45.4, 41.4, 16.4; HRMS (ESI)  $m/z$   $[\text{M}+\text{H}]^+$ : Calcd for  $\text{C}_{19}\text{H}_{18}\text{BrO}_3$ : 373.0439. Found: 373.0439.

**(E)-2-(2-Hydroxybenzoyl)-5-(4-(trifluoromethyl)phenyl)hex-4-enal (3af):**

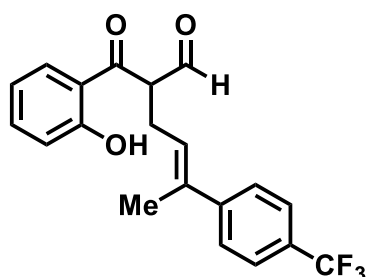

The title compound was prepared according to the general procedure. Purification by column chromatography (TLC  $R_f = 0.5$ ) on silica gel using EtOAc /PE (2:8) as the eluent the desired product **3af** as yellow oil in 64% yield (46.4 mg,  $E/Z > 99:1$ );  $^1\text{H}$  NMR (400 MHz,  $\text{CDCl}_3$ )  $\delta$  12.08 (s, 1H), 9.84 (s, 1H), 7.82 (dd,  $J_1 = 8.1$  Hz,  $J_2 = 1.7$  Hz, 1H), 7.55 (d,  $J = 7.5$  Hz, 2H), 7.49 (ddd,  $J_1 = 8.6$  Hz,  $J_2 = 7.2$  Hz,  $J_3 = 1.7$  Hz, 1H), 7.42 (d,  $J = 7.9$  Hz, 2H), 7.01 (dd,  $J_1 = 8.4$  Hz,  $J_2 = 1.2$  Hz, 1H), 6.92 (ddd,  $J_1 = 8.2$  Hz,  $J_2 = 7.2$  Hz,  $J_3 = 1.2$  Hz, 1H), 5.74 (dd,  $J_1 = 10.2$  Hz,  $J_2 = 1.4$  Hz, 1H), 4.99 – 4.93 (m, 1H), 3.38 (dd,  $J_1 = 18.6$  Hz,  $J_2 = 8.9$  Hz, 1H), 2.75 (dd,  $J_1 = 18.5$  Hz,  $J_2 = 4.6$  Hz, 1H), 2.28 (d,  $J = 1.4$  Hz, 3H);  $^{13}\text{C}$  NMR (100 MHz,  $\text{CDCl}_3$ )  $\delta$  204.7, 199.4, 163.1, 145.7, 137.5, 136.8, 130.0, 129.8, 126.2, 126.1, 125.3 (d,  $J = 3.9$  Hz), 119.1, 118.8, 118.5, 45.4, 41.3, 16.4;  $^{19}\text{F}$  NMR (376Hz,  $\text{CDCl}_3$ )  $\delta$  -62.4; HRMS (ESI)  $m/z$   $[\text{M}+\text{H}]^+$ : Calcd for  $\text{C}_{20}\text{H}_{18}\text{F}_3\text{O}_3$ : 363.1208. Found: 363.1206.

**(E)-2-(2-Hydroxybenzoyl)-5-(naphthalen-2-yl)hex-4-enal (3ag):**

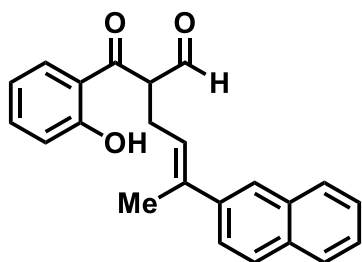

The title compound was prepared according to the general procedure. Purification by column chromatography (TLC  $R_f$  = 0.5) on silica gel using EtOAc /PE (2:8) as the eluent the desired product **3ag** as yellow oil in 39% yield (26.9 mg,  $E/Z$  > 99:1);  $^1\text{H}$  NMR (400 MHz,  $\text{CDCl}_3$ )  $\delta$  12.14 (s, 1H), 9.87 (s, 1H), 7.88 (dd,  $J_1$  = 8.1 Hz,  $J_2$  = 1.6 Hz, 1H), 7.81 – 7.75 (m, 4H), 7.50 – 7.44 (m, 4H), 7.01 (d,  $J$  = 8.4 Hz, 1H), 6.93 (t,  $J_1$  = 7.6 Hz, 1H), 5.83 (dd,  $J_1$  = 10.1 Hz,  $J_2$  = 1.5 Hz, 1H), 4.99 (td,  $J_1$  = 9.7 Hz,  $J_2$  = 9.6 Hz,  $J_3$  = 4.5 Hz, 1H), 3.42 (dd,  $J_1$  = 18.5 Hz,  $J_2$  = 9.0 Hz, 1H), 2.77 (dd,  $J_1$  = 18.5 Hz,  $J_2$  = 4.5 Hz, 1H), 2.38 (d,  $J$  = 1.4 Hz, 3H);  $^{13}\text{C}$  NMR (100 MHz,  $\text{CDCl}_3$ )  $\delta$  205.1, 199.8, 163.1, 139.3, 138.4, 136.7, 133.2, 132.7, 130.0, 128.1, 127.9, 127.5, 126.3, 126.0, 124.7, 124.6, 124.0, 119.1, 118.7, 118.6, 45.5, 41.6, 16.5; HRMS (ESI)  $m/z$   $[\text{M}+\text{H}]^+$ : Calcd for  $\text{C}_{23}\text{H}_{21}\text{O}_3$ : 345.1491. Found: 345.1484.

**(E)-5-((3r,5r,7r)-Adamantan-1-yl)-2-(2-hydroxybenzoyl)hex-4-enal (3ah):**

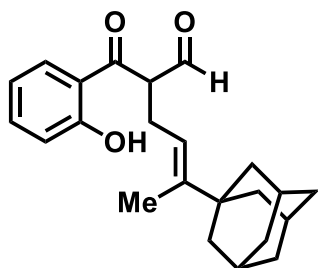

The title compound was prepared according to the general procedure. Purification by column chromatography (TLC  $R_f$  = 0.5) on silica gel using EtOAc /PE (2:8) as the eluent the desired product **3ah** as yellow oil in 65% yield (45.8 mg,  $E/Z$  > 99:1);  $^1\text{H}$  NMR (400 MHz,  $\text{CDCl}_3$ )  $\delta$  12.16 (s, 1H), 9.79 (s, 1H), 7.72 (dd,  $J_1$  = 8.1 Hz,  $J_2$  = 1.7 Hz, 1H), 7.46 (ddd,  $J_1$  = 8.6 Hz,  $J_2$  = 7.1 Hz,  $J_3$  = 1.7 Hz, 1H), 6.97 (dd,  $J_1$  = 8.4 Hz,  $J_2$  = 1.2 Hz, 1H), 6.87 (ddd,  $J_1$  = 8.2 Hz,  $J_2$  = 7.1 Hz,  $J_3$  = 1.2 Hz, 1H), 5.09 (dd,  $J_1$  = 9.9 Hz,  $J_2$  = 1.4 Hz, 1H), 4.73 (td,  $J_1$  = 9.6 Hz,  $J_2$  = 9.5 Hz,  $J_3$  = 4.5 Hz, 1H), 3.22 (dd,

$J_1 = 18.3$  Hz,  $J_2 = 9.1$  Hz, 1H), 2.55 (dd,  $J_1 = 18.2$  Hz,  $J_2 = 4.5$  Hz, 1H), 1.97 (s, 3H), 1.81 (d,  $J = 1.3$  Hz, 3H), 1.71 – 1.58 (m, 13H);  $^{13}\text{C}$  NMR (100 MHz,  $\text{CDCl}_3$ )  $\delta$  206.1, 200.3, 162.9, 147.9, 136.4, 130.1, 118.7, 118.7, 118.6, 118.5, 45.5, 41.2, 40.6, 38.1, 36.8, 28.5, 12.4; HRMS (ESI)  $m/z$   $[\text{M}+\text{H}]^+$ : Calcd for  $\text{C}_{23}\text{H}_{29}\text{O}_3$ : 353.2117. Found: 353.2112.

**2-(2-Hydroxybenzoyl)-5-methyl-7-phenylhept-4-enal (3ai):**

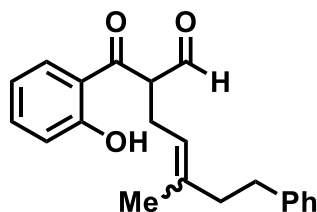

The title compound was prepared according to the general procedure. Purification by column chromatography on silica gel using EtOAc /PE (2:8) as the eluent the desired product **3ai** as yellow oil in 92% yield (59.3 mg,  $E/Z = 66:34$ ).

(TLC  $R_{f1} = 0.5$ , *major* of **3ai**):  $^1\text{H}$  NMR (400 MHz,  $\text{CDCl}_3$ )  $\delta$  12.08 (s, 1H), 9.55 (s, 1H), 7.71 – 7.68 (m, 1H), 7.47 – 7.43 (m, 1H), 7.31 – 7.27 (m, 2H), 7.22 – 7.18 (m, 3H), 6.95 (d,  $J = 8.4$  Hz, 1H), 6.88 – 6.84 (m, 1H), 5.04 (d,  $J = 10.5$  Hz, 1H), 4.55 (td,  $J_1 = 9.9$  Hz,  $J_2 = 9.8$  Hz,  $J_3 = 4.0$  Hz, 1H), 3.00 (dd,  $J_1 = 18.7$  Hz,  $J_2 = 9.5$  Hz, 1H), 2.85 – 2.78 (m, 1H), 2.78 – 2.61 (m, 2H), 2.47 – 2.41 (m, 1H), 1.85 – 1.83 (m, 1H), 1.77 (d,  $J = 1.4$  Hz, 3H);  $^{13}\text{C}$  NMR (100 MHz,  $\text{CDCl}_3$ )  $\delta$  205.5, 200.1, 163.0, 141.2, 138.7, 136.5, 130.0, 128.3, 128.2, 125.9, 122.1, 118.9, 118.6, 118.5, 45.6, 41.2, 40.8, 34.0, 16.8; HRMS (ESI)  $m/z$   $[\text{M}+\text{H}]^+$ : Calcd for  $\text{C}_{21}\text{H}_{23}\text{O}_3$ : 323.1647. Found: 323.1641.

(TLC  $R_{f2} = 0.2$ , *minor* of **3ai**):  $^1\text{H}$  NMR (400 MHz,  $\text{CDCl}_3$ )  $\delta$  12.10 (s, 1H), 9.71 (s, 1H), 7.73 (dd,  $J_1 = 8.1$  Hz,  $J_2 = 1.6$  Hz, 1H), 7.47 (ddd,  $J_1 = 8.6$  Hz,  $J_2 = 7.1$  Hz,  $J_3 = 1.7$  Hz, 1H), 7.25 – 7.11 (m, 3H), 7.06 – 7.04 (m, 2H), 6.98 (dd,  $J_1 = 8.4$  Hz,  $J_2 = 1.1$  Hz, 1H), 6.90 – 6.86 (m, 1H), 4.99 – 4.96 (m, 1H), 4.73 – 4.67 (m, 1H), 3.13 (dd,  $J_1 = 18.4$  Hz,  $J_2 = 8.7$  Hz, 1H), 2.68 – 2.65 (m, 2H), 2.50 (dd,  $J_1 = 18.4$  Hz,  $J_2 = 4.8$  Hz,

1H), 2.29 (t,  $J_1 = 7.7$  Hz, 2H), 1.85 (d,  $J = 1.5$  Hz, 3H);  $^{13}\text{C}$  NMR (100 MHz,  $\text{CDCl}_3$ )  $\delta$  205.6, 199.8, 162.9, 141.5, 138.2, 136.4, 130.0, 128.6, 128.6, 128.3, 126.2, 122.8, 118.9, 118.5, 45.9, 40.3, 34.5, 35.5, 23.2; HRMS (ESI)  $m/z$   $[\text{M}+\text{H}]^+$ : Calcd for  $\text{C}_{21}\text{H}_{23}\text{O}_3$ : 323.1647. Found: 323.1642.

**(E)-2-(2-Hydroxybenzoyl)-5-phenyloct-4-enal (3aj):**

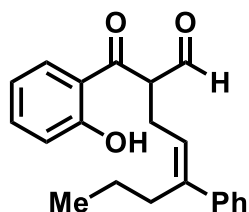

The title compound was prepared according to the general procedure. Purification by column chromatography (TLC  $R_f = 0.5$ ) on silica gel using EtOAc /PE (2:8) as the eluent the desired product **3aj** as yellow oil in 92% yield (59.3 mg,  $E/Z > 99:1$ );  $^1\text{H}$  NMR (400 MHz,  $\text{CDCl}_3$ )  $\delta$  12.11 (s, 1H), 9.83 (s, 1H), 7.90 (dd,  $J_1 = 8.1$  Hz,  $J_2 = 1.6$  Hz, 1H), 7.49 (ddd,  $J_1 = 8.6$  Hz,  $J_2 = 7.1$  Hz,  $J_3 = 1.7$  Hz, 1H), 7.29 – 7.22 (m, 5H), 7.00 (dd,  $J_1 = 8.4$  Hz,  $J_2 = 1.2$  Hz, 1H), 6.92 (ddd,  $J_1 = 8.3$  Hz,  $J_2 = 7.1$  Hz,  $J_3 = 1.2$  Hz, 1H), 5.52 (d,  $J = 10.2$  Hz, 1H), 4.97 (td,  $J_1 = 9.8$  Hz,  $J_2 = 9.8$  Hz,  $J_3 = 4.2$  Hz, 1H), 3.40 (dd,  $J_1 = 18.5$  Hz,  $J_2 = 9.3$  Hz, 1H), 2.73 – 2.65 (m, 2H), 1.43 – 1.26 (m, 3H), 0.93 (t,  $J_1 = 7.4$  Hz, 3H);  $^{13}\text{C}$  NMR (100 MHz,  $\text{CDCl}_3$ )  $\delta$  205.3, 199.8, 163.0, 144.1, 141.6, 136.7, 130.1, 128.3, 127.5, 126.5, 124.6, 118.9, 118.6, 118.5, 46.2, 41.0, 32.2, 21.4, 14.2; HRMS (ESI)  $m/z$   $[\text{M}+\text{H}]^+$ : Calcd for  $\text{C}_{21}\text{H}_{23}\text{O}_3$ : 323.1647. Found: 323.1654.

**5-Benzyl-2-(2-hydroxybenzoyl)-6-phenylhex-4-enal (3ak):**

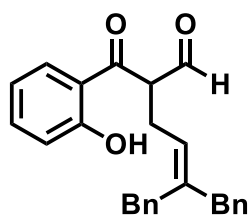

The title compound was prepared according to the general procedure. Purification by column chromatography (TLC  $R_f = 0.5$ ) on silica gel using EtOAc /PE (2:8) as the eluent the desired product **3ak** as yellow oil in 88% yield (67.7 mg);  $^1\text{H}$  NMR (400 MHz,  $\text{CDCl}_3$ )  $\delta$  12.08 (s, 1H), 9.76 (s, 1H), 7.71 (dd,  $J_1 = 8.1$  Hz,  $J_2 = 1.6$  Hz, 1H), 7.48 (ddd,  $J_1 = 8.6$  Hz,  $J_2 = 7.2$  Hz,  $J_3 = 1.7$  Hz, 1H), 7.29 – 7.20 (m, 6H), 7.08 – 7.06 (m, 2H), 7.01 – 6.96 (m, 3H), 6.79 (ddd,  $J_1 = 8.4$  Hz,  $J_2 = 7.2$  Hz,  $J_3 = 1.2$  Hz, 1H), 5.42 (d,  $J = 10.2$  Hz, 1H), 4.89 (td,  $J_1 = 9.8$  Hz,  $J_2 = 9.7$  Hz,  $J_3 = 4.2$  Hz, 1H), 3.55 – 3.42 (m, 2H), 3.34 (dd,  $J_1 = 18.5$  Hz,  $J_2 = 9.3$  Hz, 1H), 3.26 (s, 2H), 2.60 (dd,  $J_1 = 18.5$  Hz,  $J_2 = 4.2$  Hz, 1H);  $^{13}\text{C}$  NMR (100 MHz,  $\text{CDCl}_3$ )  $\delta$  205.3, 199.6, 163.0, 141.6, 138.7, 138.3, 136.6, 130.3, 128.9, 128.7, 128.6, 128.4, 126.5, 126.4, 125.2, 118.9, 118.6, 118.5, 46.0, 43.4, 40.8, 35.6; HRMS (ESI)  $m/z$   $[\text{M}+\text{H}]^+$ : Calcd for  $\text{C}_{26}\text{H}_{25}\text{O}_3$ : 385.1804. Found: 385.1801.

**5-Ethyl-2-(2-hydroxybenzoyl)hept-4-enal (3al):**

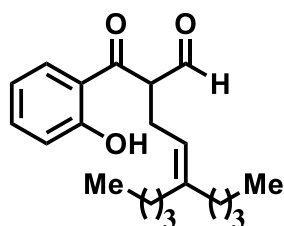

The title compound was prepared according to the general procedure. Purification by column chromatography (TLC  $R_f = 0.4$ ) on silica gel using EtOAc /PE (2:8) as the eluent the desired product **3al** as yellow oil in 93% yield (58.9 mg);  $^1\text{H}$  NMR (400 MHz,  $\text{CDCl}_3$ )  $\delta$  12.12 (s, 1H), 9.78 (s, 1H), 7.80 (dd,  $J_1 = 8.1$  Hz,  $J_2 = 1.6$  Hz, 1H), 7.46 (ddd,  $J_1 = 8.6$  Hz,  $J_2 = 7.2$  Hz,  $J_3 = 1.7$  Hz, 1H), 6.97 (dd,  $J_1 = 8.4$  Hz,  $J_2 = 1.7$  Hz, 1H), 6.87 (ddd,  $J_1 = 8.2$  Hz,  $J_2 = 7.2$  Hz,  $J_3 = 1.2$  Hz, 1H), 5.04 (d,  $J = 10.1$  Hz, 1H), 4.79 (ddd,  $J_1 = 9.7$  Hz,  $J_2 = 9.7$  Hz,  $J_3 = 4.3$  Hz, 1H), 3.27 (dd,  $J_1 = 18.5$  Hz,  $J_2 = 9.2$  Hz, 1H), 2.57 (dd,  $J_1 = 18.4$  Hz,  $J_2 = 4.3$  Hz, 1H), 2.22 – 2.13 (m, 2H), 2.00 – 1.936 (m, 2H), 1.39 – 1.17 (m, 8H), 0.96 – 0.92 (m, 3H), 0.83 (t,  $J_1 = 7.2$  Hz, 3H);  $^{13}\text{C}$  NMR (100 MHz,  $\text{CDCl}_3$ )  $\delta$  205.9, 200.2, 162.9, 144.4, 136.5, 130.2, 120.8, 118.7,

118.5, 46.4, 40.5, 36.1, 30.2, 30.2, 29.9, 23.1, 22.3, 14.1, 13.9; HRMS (ESI)  $m/z$   $[M+H]^+$ : Calcd for  $C_{21}H_{29}O_3$ : 317.2117. Found: 317.2119.

**2-(2-(2-Hydroxyphenyl)-2-oxoethyl)-4-phenylpent-3-enal (4aa):**

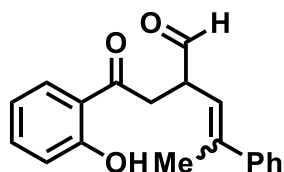

The title compound was prepared according to the general procedure. Purification by column chromatography (TLC  $R_f$  = 0.5) on silica gel using EtOAc /PE (2:8) as the eluent the desired product **4aa** as yellow oil in 83% yield (48.9 mg,  $E/Z$  = 95:5);  $^1H$  NMR (400 MHz,  $CDCl_3$ )  $\delta$  12.03 & 11.98 (s, 1H), 9.75 & 9.65 (s, 1H), 7.81 & 7.72 (dd,  $J_1$  = 8.1 Hz & 8.1Hz,  $J_2$  = 1.7 Hz & 1.7Hz, 1H), 7.48 (ddd,  $J_1$  = 8.6 Hz,  $J_2$  = 7.2 Hz,  $J_3$  = 1.6 Hz, 1H), 7.40 – 7.25 (m, 5H), 6.99 (dd,  $J_1$  = 8.4 Hz,  $J_2$  = 1.2 Hz, 1H), 6.92 (ddd,  $J_1$  = 8.2 Hz,  $J_2$  = 7.2 Hz,  $J_3$  = 1.2 Hz, 1H), 5.55 & 5.28 (dd,  $J_1$  = 9.7 Hz & 10.0 Hz,  $J_2$  = 1.4 Hz & 1.6 Hz, 1H), 4.21 – 4.15 (m, 1H), 3.74 & 3.57 (dd,  $J_1$  = 17.8 Hz & 17.7 Hz,  $J_2$  = 7.6 Hz & 7.5 Hz, 1H), 3.23 & 3.11 (dd,  $J_1$  = 17.9 Hz & 17.7 Hz,  $J_2$  = 5.0 Hz & 5.1 Hz, 1H), 2.24 & 2.10 (d,  $J$  = 1.4 Hz & 1.5 Hz, 3H);  $^{13}C$  NMR (100 MHz,  $CDCl_3$ )  $\delta$  203.4, 198.7, 162.3, 142.5, 141.8, 136.6, 129.9, 128.4, 127.7, 125.9, 120.5, 119.2, 119.1, 118.6, 47.5, 38.1, 17.0; HRMS (ESI)  $m/z$   $[M+H]^+$ : Calcd for  $C_{19}H_{19}O_3$ : 295.1334. Found: 295.1326.

**2-(2-(2-Hydroxy-5-methylphenyl)-2-oxoethyl)-4-phenylpent-3-enal (4ba):**

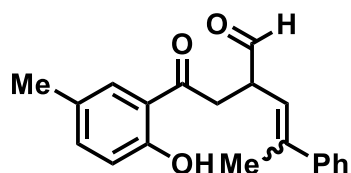

The title compound was prepared according to the general procedure. Purification by column chromatography (TLC  $R_f$  = 0.5) on silica gel using EtOAc /PE (2:8) as the eluent the desired product **4ba** as yellow oil in 83% yield (51.2 mg,  $E/Z$  = 95:5);  $^1H$



NMR (400 MHz, CDCl<sub>3</sub>)  $\delta$  11.87 & 11.81 (s, 1H), 9.75 & 9.65 (s, 1H), 7.60 (d,  $J$  = 2.3 Hz, 1H), 7.42 – 7.26 (m, 6H), 6.90 (d,  $J$  = 8.5 Hz, 1H), 5.56 & 5.28 (dd,  $J_1$  = 9.7 Hz & 10.0 Hz,  $J_2$  = 1.5 Hz & 1.5 Hz, 1H), 4.22 – 4.16 & 3.84 – 3.78 (m, 1H), 3.74 & 3.57 (dd,  $J_1$  = 17.9 Hz & 17.8 Hz,  $J_2$  = 7.6 Hz & 7.5 Hz, 1H), 3.23 & 3.12 (dd,  $J_1$  = 18.0 Hz & 17.7 Hz,  $J_2$  = 5.2 Hz & 5.3 Hz, 1H), 2.32 & 2.30 (s, 3H), 2.25 & 2.11 (d,  $J$  = 1.4 Hz & 1.5 Hz, 3H); <sup>13</sup>C NMR (100 MHz, CDCl<sub>3</sub>)  $\delta$  203.2, 198.8, 160.2, 142.5, 141.6, 137.7, 129.6, 128.3, 128.2, 127.7, 125.8, 120.5, 118.7, 118.3, 47.5, 38.1, 20.5, 16.9; HRMS (ESI)  $m/z$  [M+H]<sup>+</sup>: Calcd for C<sub>20</sub>H<sub>21</sub>O<sub>3</sub>: 309.1491. Found: 309.1493.

**2-(2-(5-Fluoro-2-hydroxyphenyl)-2-oxoethyl)-4-phenylpent-3-enal (4ca):**

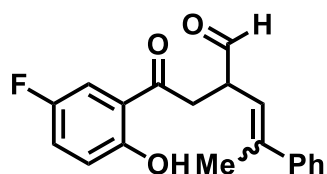

The title compound was prepared according to the general procedure. Purification by column chromatography (TLC R<sub>f</sub> = 0.6) on silica gel using EtOAc /PE (2:8) as the eluent the desired product **4ca** as yellow oil in 78% yield (48.7 mg, *E/Z* = 96:4); <sup>1</sup>H NMR (400 MHz, CDCl<sub>3</sub>)  $\delta$  12.35 & 12.30 (d,  $J$  = 1.5 Hz & 1.5 Hz, 1H), 9.74 & 9.64 (s, 1H), 7.83 & 7.72 (dd,  $J_1$  = 8.9 Hz & 9.0 Hz,  $J_2$  = 6.3 Hz & 6.4 Hz, 1H), 7.40 – 7.29(m, 5H), 6.68 – 6.61 (m, 2H) 5.53 & 5.26 (dd,  $J_1$  = 9.7 Hz & 10.1 Hz,  $J_2$  = 1.5 Hz & 1.6 Hz, 1H), 4.22 – 4.16 & 3.87 – 3.73 (m, 1H), 3.69 & 3.52 (dd,  $J_1$  = 17.8 Hz & 17.6 Hz,  $J_2$  = 7.6 Hz & 7.5 Hz, 1H), 3.17 & 3.05 (dd,  $J_1$  = 17.8 Hz & 17.5 Hz,  $J_2$  = 5.1 Hz & 5.3 Hz, 1H), 2.25 & 2.11 (d,  $J$  = 1.5 Hz & 1.5 Hz, 3H); <sup>13</sup>C NMR (100 MHz, CDCl<sub>3</sub>)  $\delta$  202.2, 198.5, 167.5 (d,  $J$  = 257.3 Hz), 164.9 (d,  $J$  = 14.4 Hz), 142.4, 141.9, 132.2 (d,  $J$  = 11.9 Hz), 128.4, 127.7, 125.8, 120.2, 116.3, 107.4 (d,  $J$  = 23.0 Hz), 105.1 (d,  $J$  = 23.6 Hz), 47.5, 38.0, 17.0; <sup>19</sup>F NMR (376Hz,CDCl<sub>3</sub>)  $\delta$  -98.7; HRMS (ESI)  $m/z$  [M+H]<sup>+</sup>: Calcd for C<sub>19</sub>H<sub>18</sub>FO<sub>3</sub>: 313.1240. Found: 313.1230.

**2-(2-(5-Chloro-2-hydroxyphenyl)-2-oxoethyl)-4-phenylpent-3-enal (4da):**

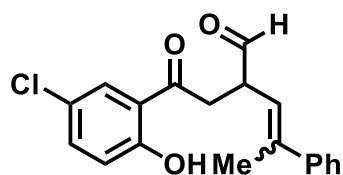

The title compound was prepared according to the general procedure. Purification by column chromatography (TLC  $R_f = 0.4$ ) on silica gel using EtOAc /PE (2:8) as the eluent the desired product **4da** as yellow oil in 77% yield (50.6 mg,  $E/Z = 97:3$ );  $^1\text{H}$  NMR (400 MHz,  $\text{CDCl}_3$ )  $\delta$  11.91 & 11.85 (s, 1H), 9.72 & 9.62 (s, 1H), 7.77 & 7.69 (d,  $J = 2.5$  Hz & 2.5 Hz, 1H), 7.46 – 7.36 (m, 3H), 7.36 – 7.27 (m, 3H), 6.94 (d,  $J = 8.9$  Hz, 1H), 5.52 & 5.25 (dd,  $J_1 = 9.8$  Hz & 10.1 Hz,  $J_2 = 1.4$  Hz & 1.6 Hz, 1H), 4.21 – 4.15 & 3.82 – 3.77 (m, 1H), 3.70 & 3.52 (dd,  $J_1 = 18.0$  Hz & 17.9 Hz,  $J_2 = 7.7$  Hz & 7.7 Hz, 1H), 3.16 & 3.05 (dd,  $J_1 = 18.0$  Hz & 18.0 Hz,  $J_2 = 5.0$  Hz & 5.0 Hz, 1H), 2.25 & 2.10 (d,  $J = 1.4$  Hz & 1.5 Hz, 3H);  $^{13}\text{C}$  NMR (100 MHz,  $\text{CDCl}_3$ )  $\delta$  202.6, 198.3, 160.8, 142.3, 142.0, 136.5, 129.1, 128.4, 127.8, 125.8, 123.7, 120.2, 120.0, 119.7, 47.4, 38.0, 17.0; HRMS (ESI)  $m/z$   $[\text{M}+\text{H}]^+$ : Calcd for  $\text{C}_{19}\text{H}_{18}\text{ClO}_3$ : 329.0944. Found: 329.0934.

**2-(2-(5-Bromo-2-hydroxyphenyl)-2-oxoethyl)-4-phenylpent-3-enal (4ea):**

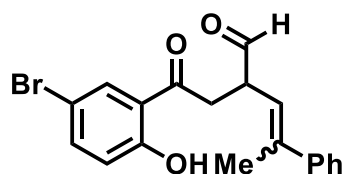

The title compound was prepared according to the general procedure. Purification by column chromatography (TLC  $R_f = 0.4$ ) on silica gel using EtOAc /PE (2:8) as the eluent the desired product **4ea** as yellow oil in 77% yield (57.5 mg,  $E/Z = 97:3$ );  $^1\text{H}$  NMR (400 MHz,  $\text{CDCl}_3$ )  $\delta$  11.94 & 11.88 (s, 1H), 9.72 & 9.62 (s, 1H), 7.91 & 7.83 (d,  $J = 2.4$  Hz & 2.4 Hz, 1H), 7.55 (dd,  $J_1 = 8.9$  Hz,  $J_2 = 2.4$  Hz, 1H), 7.40 – 7.28 (m, 5H), 6.90 (d,  $J = 8.9$  Hz, 1H), 5.52 & 5.25 (dd,  $J_1 = 9.8$  Hz & 10.2 Hz,  $J_2 = 1.5$  Hz & 1.5 Hz, 1H), 4.21 – 4.16 (m, 1H), 3.70 & 3.53 (dd,  $J_1 = 18.1$  Hz & 18.0 Hz,  $J_2 = 7.8$  Hz & 7.7 Hz, 1H), 3.17 & 3.05 (dd,  $J_1 = 18.1$  Hz & 18.0 Hz,  $J_2 = 4.9$  Hz & 5.0 Hz, 1H), 2.25 & 2.11 (d,  $J = 1.4$  Hz & 1.5 Hz, 3H);  $^{13}\text{C}$  NMR (100 MHz,  $\text{CDCl}_3$ )  $\delta$  202.6, 198.3, 161.3,

142.4, 142.1, 139.3, 132.2, 128.4, 127.8, 125.9, 120.6, 120.4, 120.0, 110.6, 47.4, 38.0, 17.0; HRMS (ESI)  $m/z$   $[M+H]^+$ : Calcd for  $C_{19}H_{18}BrO_3$ : 373.0439. Found: 373.0443.

**2-(2-(2-Hydroxy-5-methoxyphenyl)-2-oxoethyl)-4-phenylpent-3-enal (4fa):**

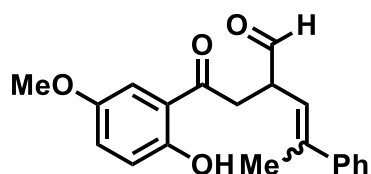

The title compound was prepared according to the general procedure. Purification by column chromatography (TLC  $R_f$  = 0.5) on silica gel using EtOAc /PE (2:8) as the eluent the desired product **4fa** as yellow oil in 53% yield (34.4 mg,  $E/Z$  = 92:8);  $^1H$  NMR (400 MHz,  $CDCl_3$ )  $\delta$  12.51 & 12.46 (s, 1H), 9.75 & 9.65 (s, 1H), 7.70 & 7.61 (d,  $J$  = 8.8 Hz & 8.9 Hz, 1H), 7.40 – 7.26 (m, 5H), 6.48 – 6.40 (m, 2H), 5.54 & 5.27 (dd,  $J_1$  = 9.7 Hz & 10.1 Hz,  $J_2$  = 1.4 Hz & 1.6 Hz, 1H), 4.18 – 4.11 & 3.79 – 3.71 (m, 1H), 3.79 & 3.71 (s, 3H), 3.63 & 3.47 (dd,  $J_1$  = 17.5 Hz & 17.4 Hz,  $J_2$  = 7.6 Hz & 7.6 Hz, 1H), 3.15 & 3.04 (dd,  $J_1$  = 17.6 Hz & 17.4 Hz,  $J_2$  = 5.2 Hz & 5.3 Hz, 1H), 2.22 & 2.09 (d,  $J$  = 1.4 Hz & 1.5 Hz, 3H);  $^{13}C$  NMR (100 MHz,  $CDCl_3$ )  $\delta$  201.3, 198.9, 166.2, 165.2, 142.5, 141.5, 131.5, 128.3, 127.6, 125.8, 120.7, 113.3, 107.9, 100.9, 55.6, 47.6, 37.7, 16.9; HRMS (ESI)  $m/z$   $[M+H]^+$ : Calcd for  $C_{20}H_{21}O_4$ : 325.1440. Found: 325.1430.

**2-(2-(2-Hydroxy-5-methoxyphenyl)-2-oxoethyl)-4-phenylpent-3-enal (4ga):**

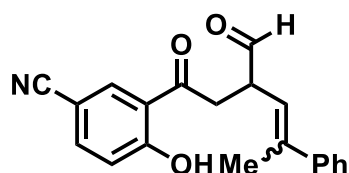

The title compound was prepared according to the general procedure. Purification by column chromatography (TLC  $R_f$  = 0.4) on silica gel using EtOAc /PE (2:8) as the eluent the desired product **4ga** as yellow oil in 83% yield (53.0 mg,  $E/Z$  = 97:3);  $^1H$  NMR (400 MHz,  $CDCl_3$ )  $\delta$  12.48 & 12.42 (s, 1H), 9.71 & 9.62 (s, 1H), 8.18 (d,  $J$  =

1.9 Hz, 1H). 7.72 (dd,  $J_1 = 8.8$  Hz,  $J_2 = 1.9$  Hz, 1H), 7.44 – 7.29 (m, 5H), 7.08 (d,  $J = 8.8$  Hz, 1H), 5.53 & 5.26 (dd,  $J_1 = 9.9$  Hz & 9.9 Hz,  $J_2 = 1.4$  Hz & 1.4 Hz, 1H), 4.27 – 4.18 & 3.88 – 3.81 (m, 1H), 3.75 (dd,  $J_1 = 18.1$  Hz,  $J_2 = 8.0$  Hz, 1H), 3.05 & 3.18 (dd,  $J_1 = 18.1$  Hz & 17.2 Hz,  $J_2 = 4.6$  Hz & 5.0 Hz, 1H), 2.27 & 2.13 (d,  $J = 1.5$  Hz & 1.5 Hz, 3H);  $^{13}\text{C}$  NMR (100 MHz,  $\text{CDCl}_3$ )  $\delta$  202.7, 198.0, 165.3, 142.4, 142.2, 138.8, 135.0, 128.4, 127.9, 125.8, 120.2, 119.5, 119.3, 118.1, 102.8, 47.4, 37.8, 17.0; HRMS (ESI)  $m/z$   $[\text{M}+\text{H}]^+$ : Calcd for  $\text{C}_{20}\text{H}_{18}\text{NO}_3$ : 320.1287. Found: 320.1288.

**2-(2-(1-Hydroxynaphthalen-2-yl)-2-oxoethyl)-4-phenylpent-3-enal (4ha):**

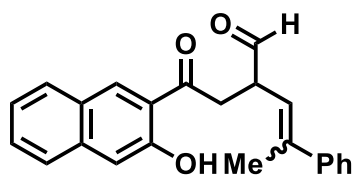

The title compound was prepared according to the general procedure. Purification by column chromatography (TLC  $R_f = 0.6$ ) on silica gel using EtOAc /PE (2:8) as the eluent the desired product **4ha** as yellow oil in 73% yield (50.3 mg,  $E/Z = 94:6$ );  $^1\text{H}$  NMR (400 MHz,  $\text{CDCl}_3$ )  $\delta$  13.74 & 13.68 (s, 1H), 9.78 & 9.68 (s, 1H), 8.44 (d,  $J = 7.8$  Hz, 1H), 7.73 (dd,  $J_1 = 19.7$  Hz,  $J_2 = 8.6$  Hz, 2H), 7.65 – 7.61 (m, 1H), 7.54 – 7.50 (m, 1H), 7.40 – 7.38 (m, 2H), 7.35 – 7.25 (m, 4H), 5.58 & 5.31 (dd,  $J_1 = 9.7$  Hz & 10.2 Hz,  $J_2 = 1.4$  Hz & 1.6 Hz, 1H), 4.26 – 4.20 (m, 1H), 3.80 & 3.63 (dd,  $J_1 = 17.9$  Hz & 17.6 Hz,  $J_2 = 7.6$  Hz & 7.5 Hz, 1H), 3.30 & 3.20 (dd,  $J_1 = 17.8$  Hz & 17.6 Hz,  $J_2 = 5.1$  Hz & 5.3 Hz, 1H), 2.25 & 2.10 (d,  $J = 1.4$  Hz & 1.5 Hz, 3H);  $^{13}\text{C}$  NMR (100 MHz,  $\text{CDCl}_3$ )  $\delta$  203.0, 198.8, 162.5, 142.5, 141.7, 137.4, 130.2, 128.4, 127.7, 127.4, 126.0, 125.9, 125.2, 124.5, 124.0, 120.6, 118.6, 112.7, 47.6, 38.4, 17.0.; HRMS (ESI)  $m/z$   $[\text{M}+\text{H}]^+$ : Calcd for  $\text{C}_{23}\text{H}_{21}\text{O}_3$ : 345.1491. Found: 345.1483.

**2-(2-(2-Hydroxyphenyl)-2-oxoethyl)-4-(p-tolyl)pent-3-enal (4ab):**

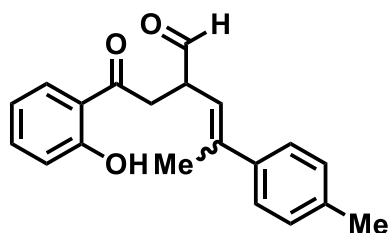

The title compound was prepared according to the general procedure. Purification by column chromatography (TLC  $R_f$  = 0.4) on silica gel using EtOAc /PE (2:8) as the eluent the desired product **4ab** as yellow oil in 70% yield (43.2 mg,  $E/Z$  = 91:9);  $^1\text{H}$  NMR (400 MHz,  $\text{CDCl}_3$ )  $\delta$  12.05 & 11.99 (s, 1H), 9.74 & 9.65 (s, 1H), 7.82 & 7.74 (dd,  $J_1$  = 8.0 Hz & 8.0 Hz,  $J_2$  = 1.6 Hz & 1.8 Hz, 1H), 7.52 – 6.89 (m, 7H), 5.52 & 5.25 (dd,  $J$  = 9.6 Hz & 10.0 Hz, 1.4 Hz & 1.6 Hz, 1H), 4.18 & 3.83 (ddd,  $J_1$  = 9.6 Hz & 10.1 Hz,  $J_2$  = 7.6 Hz & 7.6 Hz,  $J_3$  = 5.1 Hz & 5.1 Hz, 1H), 3.74 & 3.58 (dd,  $J_1$  = 18.0 Hz & 17.6 Hz,  $J_2$  = 7.7 Hz & 7.6 Hz, 1H), 3.22 & 3.11 (dd,  $J_1$  = 17.8 Hz & 17.7 Hz,  $J_2$  = 5.0 Hz & 5.1 Hz, 1H), 2.36 & 2.35 (s, 3H), 2.23 & 2.09 (d,  $J$  = 1.4 Hz & 1.5 Hz, 3H);  $^{13}\text{C}$  NMR (100 MHz,  $\text{CDCl}_3$ )  $\delta$  203.2, 198.8, 160.2, 142.5, 141.6, 137.7, 129.6, 128.3, 128.2, 127.7, 125.8, 120.5, 118.7, 118.3, 47.5, 38.1, 20.5, 16.9; HRMS (ESI)  $m/z$   $[\text{M}+\text{H}]^+$ : Calcd for  $\text{C}_{20}\text{H}_{21}\text{O}_3$ : 309.1491. Found: 309.1487.

**4-(4-Fluorophenyl)-2-(2-(2-hydroxyphenyl)-2-oxoethyl)pent-3-enal (4ac):**

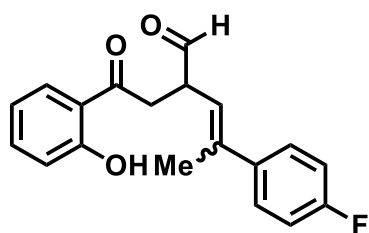

The title compound was prepared according to the general procedure. Purification by column chromatography (TLC  $R_f$  = 0.5) on silica gel using EtOAc /PE (2:8) as the eluent the desired product **4ac** as yellow oil in 61% yield (38.1 mg,  $E/Z$  = 94:6);  $^1\text{H}$  NMR (400 MHz,  $\text{CDCl}_3$ )  $\delta$  12.02 & 11.97 (s, 1H), 9.73 & 9.62 (s, 1H), 7.81 (dd,  $J_1$  = 8.0,  $J_2$  = 1.6 Hz, 1H), 7.52 – 7.31 (m, 3H), 7.04 – 6.89 (m, 4H), 5.50 & 5.29 (dd,  $J_1$  = 9.6 Hz & 10.0 Hz,  $J_2$  = 1.4 Hz & 1.5 Hz, 1H), 4.16 (ddd,  $J_1$  = 9.8 Hz,  $J_2$  = 7.4 Hz,  $J_3$  =

5.2 Hz, 1H), 3.73 & 3.57 (dd,  $J_1 = 17.9$  Hz & 17.6 Hz,  $J_2 = 7.4$  Hz & 7.1 Hz, 1H), 3.24 & 3.12 (dd,  $J_1 = 17.8$  Hz & 17.6 Hz,  $J_2 = 5.1$  Hz & 5.4 Hz, 1H), 2.22 & 2.08 (d,  $J = 1.3$  Hz & 1.5 Hz, 3H);  $^{13}\text{C}$  NMR (100 MHz,  $\text{CDCl}_3$ )  $\delta$  203.3, 198.6, 163.6, 162.4, 161.1, 140.7, 138.5 (d,  $J = 3.4$  Hz), 136.7, 127.5 (d,  $J = 8.1$  Hz), 120.5, 119.1, 119.1, 118.6, 115.2 (d,  $J = 21.4$  Hz), 47.5, 38.1, 17.1;  $^{19}\text{F}$  NMR (376Hz,  $\text{CDCl}_3$ )  $\delta$  -114.6; HRMS (ESI)  $m/z$   $[\text{M}+\text{H}]^+$ : Calcd for  $\text{C}_{19}\text{H}_{18}\text{FO}_3$ : 313.1240. Found: 313.1230.

**4-(4-Chlorophenyl)-2-(2-(2-hydroxyphenyl)-2-oxoethyl)pent-3-enal (4ad):**

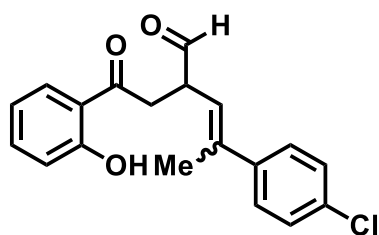

The title compound was prepared according to the general procedure. Purification by column chromatography (TLC  $R_f = 0.5$ ) on silica gel using EtOAc /PE (2:8) as the eluent the desired product **4ad** as yellow oil in 82% yield (53.9 mg,  $E/Z = 93:7$ );  $^1\text{H}$  NMR (400 MHz,  $\text{CDCl}_3$ )  $\delta$  12.01 & 11.96 (s, 1H), 9.74 & 9.63 (s, 1H), 7.81 (dd,  $J_1 = 8.0$  Hz,  $J_2 = 1.6$  Hz, 1H), 7.55 – 7.27 (m, 5H), 7.02 – 6.88 (m, 2H), 5.55 & 5.29 (dd,  $J_1 = 9.8$  Hz & 10.3 Hz,  $J_2 = 1.5$  Hz & 1.6 Hz, 1H), 4.20 – 4.13 (m, 1H). 3.74 & 3.57 (dd,  $J = 17.8$  Hz & 17.8 Hz,  $J_2 = 7.4$  Hz & 7.2 Hz, 1H), 3.24 & (dd,  $J_1 = 17.9$  Hz & 17.6 Hz,  $J_2 = 5.3$  Hz & 5.4 Hz, 1H), 2.22 & 2.08 (d,  $J = 1.2$  Hz & 1.5 Hz, 3H);  $^{13}\text{C}$  NMR (100 MHz,  $\text{CDCl}_3$ )  $\delta$  203.2, 198.6, 162.3, 140.9, 140.6, 136.7, 133.5, 129.8, 128.8, 128.5, 127.2, 121.1, 119.1, 118.6, 47.5, 38.1, 16.9; HRMS (ESI)  $m/z$   $[\text{M}+\text{H}]^+$ : Calcd for  $\text{C}_{19}\text{H}_{18}\text{ClO}_3$ : 329.0944. Found: 329.0940.

**4-(4-Bromophenyl)-2-(2-(2-hydroxyphenyl)-2-oxoethyl)pent-3-enal (4ae):**

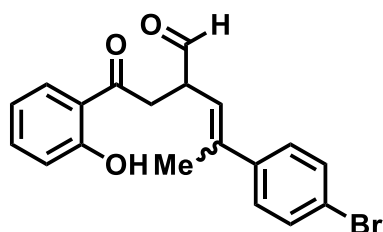

The title compound was prepared according to the general procedure. Purification by column chromatography (TLC  $R_f = 0.5$ ) on silica gel using EtOAc /PE (2:8) as the eluent the desired product **4ae** as yellow oil in 87% yield (64.9 mg,  $E/Z = 93:7$ );  $^1\text{H}$  NMR (400 MHz,  $\text{CDCl}_3$ )  $\delta$  12.00 & 11.95 (s, 1H), 9.74 & 9.63 (s, 1H), 7.81 (dd,  $J_1 = 8.0$  Hz,  $J_2 = 1.6$  Hz, 1H), 7.52 – 7.22 (m, 5H), 7.02 – 6.89 (m, 2H), 5.55 & 5.30 (dd,  $J_1 = 9.6$  Hz & 10.3 Hz,  $J_2 = 1.5$  Hz & 1.6 Hz, 1H), 4.22 – 4.11 (m, 1H), 3.73 & 3.56 (dd,  $J_1 = 17.9$  Hz & 17.6 Hz,  $J_2 = 7.5$  Hz & 7.1 Hz, 1H), 3.24 & 3.12 (dd,  $J_1 = 17.9$  Hz & 17.6 Hz,  $J_2 = 5.3$  Hz & 5.4 Hz, 1H), 2.21 & 2.08 (d,  $J = 1.4$  Hz & 1.6 Hz, 3H);  $^{13}\text{C}$  NMR (100 MHz,  $\text{CDCl}_3$ )  $\delta$  203.1, 198.3, 162.2, 141.2, 140.5, 136.6, 131.3, 129.7, 127.3, 121.6, 121.0, 119.1, 119.0, 118.5, 47.4, 38.0, 16.7; HRMS (ESI)  $m/z$   $[\text{M}+\text{H}]^+$ : Calcd for  $\text{C}_{19}\text{H}_{18}\text{BrO}_3$ : 373.0439. Found: 373.0443.

**(*E*)-2-(2-(2-Hydroxyphenyl)-2-oxoethyl)-4-(4-methoxyphenyl)pent-3-enal (4af):**

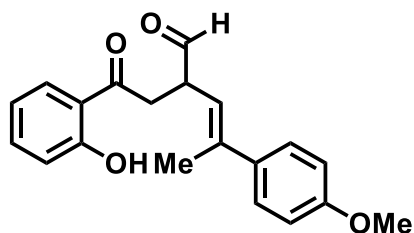

The title compound was prepared according to the general procedure. Purification by column chromatography (TLC  $R_f = 0.4$ ) on silica gel using EtOAc /PE (2:8) as the eluent the desired product **4af** as yellow oil in 55% yield (35.7 mg,  $E/Z = 99 > 1$ );  $^1\text{H}$  NMR (400 MHz,  $\text{CDCl}_3$ )  $\delta$  12.06 (s, 1H), 9.73 (s, 1H), 7.82 (dd,  $J_1 = 8.1$  Hz,  $J_2 = 1.6$  Hz, 1H), 7.48 (ddd,  $J_1 = 8.5$  Hz,  $J_2 = 7.1$  Hz,  $J_3 = 1.5$  Hz, 1H), 7.34 (d,  $J = 8.8$  Hz, 2H), 6.99 (dd,  $J_1 = 8.4$  Hz,  $J_2 = 1.1$  Hz, 1H), 6.92 (ddd,  $J_1 = 8.1$  Hz,  $J_2 = 7.1$  Hz,  $J_3 = 1.1$  Hz, 1H), 6.87 (d,  $J = 8.8$  Hz, 2H), 5.47 (dd,  $J_1 = 9.7$  Hz,  $J_2 = 1.4$  Hz, 1H), 4.20 – 4.15 (m, 1H), 3.81 (s, 3H), 3.74 (dd,  $J_1 = 17.9$  Hz,  $J_2 = 7.7$  Hz, 1H), 3.22 (dd,  $J_1 = 17.9$  Hz,  $J_2 = 5.2$  Hz, 1H), 3.22 (d,  $J = 1.3$  Hz, 3H);  $^{13}\text{C}$  NMR (100 MHz,  $\text{CDCl}_3$ )  $\delta$  203.4, 198.7, 162.3, 159.2, 141.0, 136.6, 134.8, 129.9, 126.9, 119.1, 119.0, 118.7, 118.5, 113.6, 55.3, 47.5, 38.1, 16.9; HRMS (ESI)  $m/z$   $[\text{M}+\text{H}]^+$ : Calcd for  $\text{C}_{20}\text{H}_{21}\text{O}_4$ : 325.1440. Found: 325.1435.

**2-(2-(2-Hydroxyphenyl)-2-oxoethyl)-4-(naphthalen-2-yl)pent-3-enal (4ag):**

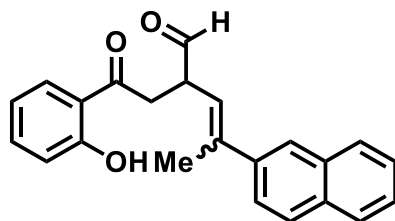

The title compound was prepared according to the general procedure. Purification by column chromatography (TLC  $R_f = 0.5$ ) on silica gel using EtOAc /PE (2:8) as the eluent the desired product **4ag** as yellow oil in 63% yield (43.4 mg,  $E/Z = 92:8$ );  $^1\text{H}$  NMR (400 MHz,  $\text{CDCl}_3$ )  $\delta$  12.05 & 11.98 (s, 1H), 9.80 & 9.68 (s, 1H), 7.87 – 7.77 (m, 5H), 7.59 – 7.41 (m, 4H), 7.04 – 6.84 (m, 2H), 5.71 & 5.37 (dd,  $J_1 = 9.9$  Hz & 10.0 Hz,  $J_2 = 1.5$  Hz & 1.5 Hz, 1H), 4.31 – 4.21 & 3.89 – 3.83 (m, 1H), 3.79 & 3.58 (dd,  $J_1 = 17.8$  Hz & 17.6 Hz,  $J_2 = 7.6$  Hz & 7.2 Hz, 1H), 3.28 & 3.15 (dd,  $J_1 = 17.9$  Hz & 17.6 Hz,  $J_2 = 5.0$  Hz & 5.4 Hz, 1H), 2.36 & 2.19 (d,  $J = 1.3$  Hz & 1.5 Hz, 3H);  $^{13}\text{C}$  NMR (100 MHz,  $\text{CDCl}_3$ )  $\delta$  203.3, 198.6, 162.3, 141.5, 139.6, 136.6, 133.2, 132.8, 129.9, 128.1, 127.9, 127.5, 126.3, 126.0, 124.7, 124.0, 120.9, 119.1, 119.0, 118.5, 47.6, 38.1, 17.0; HRMS (ESI)  $m/z$   $[\text{M}+\text{H}]^+$ : Calcd for  $\text{C}_{23}\text{H}_{21}\text{O}_3$ : 345.1491. Found: 345.1485.

**4-((3r,5r,7r)-Adamantan-1-yl)-2-(2-(2-hydroxyphenyl)-2-oxoethyl)pent-3-enal**

**(4ah):**

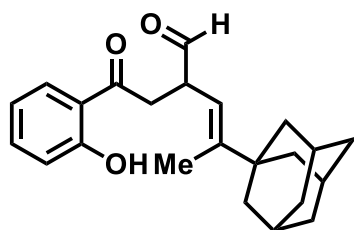

The title compound was prepared according to the general procedure. Purification by column chromatography (TLC  $R_f = 0.5$ ) on silica gel using EtOAc /PE (2:8) as the eluent the desired product **4ah** as yellow oil in 57% yield (40.2 mg,  $E/Z > 99:1$ );  $^1\text{H}$  NMR (400 MHz,  $\text{CDCl}_3$ )  $\delta$  12.07 (s, 1H), 9.59 (s, 1H), 7.80 (dd,  $J_1 = 8.1$  Hz,  $J_2 = 1.7$



Hz, 1H), 7.48 – 7.44 (m, 1H), 6.96 (dd,  $J_1 = 8.4$  Hz,  $J_2 = 1.4$  Hz, 1H), 6.90 (ddd,  $J_1 = 8.3$  Hz,  $J_2 = 7.1$  Hz,  $J_3 = 1.2$  Hz, 1H), 4.89 (dd,  $J_1 = 9.4$  Hz,  $J_2 = 1.3$  Hz, 1H), 4.04 – 3.98 (m, 1H), 3.61 (dd,  $J_1 = 17.7$  Hz,  $J_2 = 7.9$  Hz, 1H), 3.06 (dd,  $J_1 = 17.6$  Hz,  $J_2 = 5.0$  Hz, 1H), 1.99 (s, 3H), 1.76 – 1.61 (m, 15H);  $^{13}\text{C}$  NMR (100 MHz,  $\text{CDCl}_3$ )  $\delta$  203.9, 199.3, 162.3, 151.7, 136.5, 130.0, 119.3, 119.0, 118.5, 114.2, 47.0, 40.7, 38.4, 38.1, 36.8, 28.5, 12.9; HRMS (ESI)  $m/z$   $[\text{M}+\text{H}]^+$ : Calcd for  $\text{C}_{23}\text{H}_{29}\text{O}_3$ : 353.2117. Found: 353.2114.

**2-(2-(2-Hydroxyphenyl)-2-oxoethyl)-4-phenylhept-3-enal (4ai):**

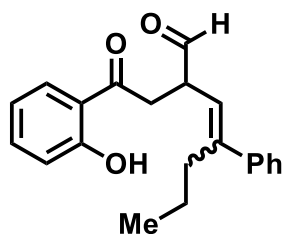

The title compound was prepared according to the general procedure. Purification by column chromatography (TLC  $R_f = 0.4$ ) on silica gel using EtOAc /PE (2:8) as the eluent the desired product **4ai** as yellow oil in 84% yield (54.2 mg,  $E/Z = 94:6$ );  $^1\text{H}$  NMR (400 MHz,  $\text{CDCl}_3$ )  $\delta$  12.06 & 12.01 (s, 1H), 9.75 & 9.64 (s, 1H), 7.81 & 7.73 (dd,  $J_1 = 8.0$  Hz & 8.0 Hz,  $J_2 = 1.7$  Hz & 1.8 Hz, 1H), 7.54 – 7.27 (m, 6H), 7.03 – 6.88 (m, 2H), 5.39 & 5.24 (d,  $J = 10.0$  Hz & 10.0 Hz, 1H), 4.20 (ddd,  $J_1 = 10.2$  Hz,  $J_2 = 7.9$  Hz,  $J_3 = 5.0$  Hz, 1H), 3.75 & 3.57 (dd,  $J_1 = 17.9$  Hz & 17.6 Hz,  $J_2 = 7.9$  Hz & 7.6 Hz, 1H), 3.21 & 3.11 (dd,  $J_1 = 17.9$  Hz & 17.6 Hz,  $J_2 = 5.0$  Hz & 5.4 Hz, 1H), 2.66 & 2.37 (t,  $J = 7.3$  Hz & 7.1 Hz, 2H), 1.42 (qd,  $J_1 = 7.6$  Hz,  $J_2 = 3.0$  Hz, 2H), 0.93 & 0.88 (t,  $J = 7.5$  Hz & 7.3 Hz, 3H);  $^{13}\text{C}$  NMR (100 MHz,  $\text{CDCl}_3$ )  $\delta$  203.6, 199.0, 162.6, 147.8, 142.1, 136.8, 130.1, 128.6, 127.8, 126.7, 120.7, 119.4, 119.3, 118.8, 47.6, 38.5, 31.3, 22.9, 14.1; HRMS (ESI)  $m/z$   $[\text{M}+\text{H}]^+$ : Calcd for  $\text{C}_{21}\text{H}_{23}\text{O}_3$ : 323.1647. Found: 323.1652.

**2-(2-(2-Hydroxyphenyl)-2-oxoethyl)-4-phenyloct-3-enal (4aj):**

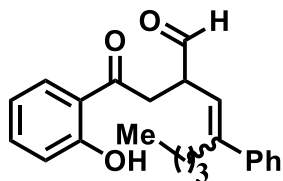

The title compound was prepared according to the general procedure. Purification by column chromatography (TLC  $R_f = 0.4$ ) on silica gel using EtOAc /PE (2:8) as the eluent the desired product **4aj** as yellow oil in 61% yield (41.0 mg,  $E/Z = 90:10$ );  $^1\text{H}$  NMR (400 MHz,  $\text{CDCl}_3$ )  $\delta$  12.03 & 11.98 (s, 1H), 9.73 & 9.62 (s, 1H), 7.80 & 7.72 (dd,  $J_1 = 8.1$  Hz & 8.1 Hz,  $J_2 = 1.7$  Hz & 1.7 Hz, 1H), 7.48 (ddd,  $J_1 = 8.7$  Hz,  $J_2 = 7.2$  Hz,  $J_3 = 1.7$  Hz, 1H), 7.35 – 7.26 (m, 5H), 6.98 (dd,  $J_1 = 10.0$  Hz,  $J_2 = 1.2$  Hz, 1H), 6.91 (ddd,  $J_1 = 8.2$  Hz,  $J_2 = 7.2$  Hz,  $J_3 = 1.2$  Hz, 1H), 5.36 & 5.23 (d,  $J = 10.1$  Hz & 10.0 Hz, 1H), 4.20 – 4.14 (m, 1H), 3.73 & 3.55 (dd,  $J_1 = 17.6$  Hz & 17.5 Hz,  $J_2 = 7.7$  Hz & 7.4 Hz, 1H), 3.18 & 3.09 (dd,  $J_1 = 17.6$  Hz & 17.5 Hz,  $J_2 = 7.7$  Hz & 7.4 Hz, 1H), 2.68 – 2.63 & 2.39 – 2.35 (m, 2H), 1.38 – 1.28 (m, 4H), 0.88 – 0.84 (m, 3H);  $^{13}\text{C}$  NMR (100 MHz,  $\text{CDCl}_3$ )  $\delta$  203.4, 198.8, 162.4, 147.6, 141.9, 136.6, 129.9, 128.4, 127.6, 126.5, 120.5, 119.2, 119.1, 118.6, 47.4, 38.3, 31.1, 30.5, 22.7, 13.9; HRMS (ESI)  $m/z$   $[\text{M}+\text{H}]^+$ : Calcd for  $\text{C}_{22}\text{H}_{25}\text{O}_3$ : 337.1804. Found: 337.1794.

## 2-((3,4-Dihydronaphthalen-1(2H)-ylidene)methyl)-4-(2-hydroxyphenyl)-4-oxobut

anal (**4ak**):

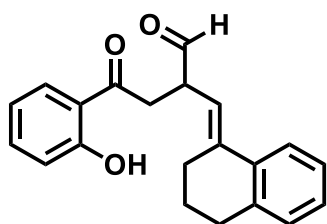

The title compound was prepared according to the general procedure. Purification by column chromatography (TLC  $R_f = 0.5$ ) on silica gel using EtOAc /PE (2:8) as the eluent the desired product **4ak** as yellow oil in 73% yield (46.8 mg,  $E/Z > 99:1$ );  $^1\text{H}$  NMR (400 MHz,  $\text{CDCl}_3$ )  $\delta$  12.04 (s, 1H), 9.72 (s, 1H), 7.82 (dd,  $J_1 = 8.0$  Hz,  $J_2 = 1.6$  Hz, 1H), 7.57 – 7.45 (m, 2H), 7.22 – 7.10 (m, 3H), 7.01 – 6.88 (m, 2H), 5.74 (dt,  $J_1 = 9.8$  Hz,  $J_2 = 1.8$  Hz, 1H), 4.30 – 4.16 (m, 1H), 3.75 (dd,  $J_1 = 18.0$  Hz,  $J_2 = 7.6$  Hz, 1H),

3.23 (dd,  $J_1 = 17.9$  Hz,  $J_2 = 5.1$  Hz, 1H), 2.87 – 2.60 (m, 4H), 2.02 – 1.83 (m, 2H);  $^{13}\text{C}$  NMR (100 MHz,  $\text{CDCl}_3$ )  $\delta$  203.4, 198.6, 162.3, 140.9, 137.8, 136.6, 134.9, 129.8, 129.0, 127.8, 126.2, 124.0, 119.1, 119.0, 118.5, 116.1, 46.9, 38.1, 30.2, 27.4, 23.2; HRMS (ESI)  $m/z$   $[\text{M}+\text{H}]^+$ : Calcd for  $\text{C}_{21}\text{H}_{21}\text{O}_3$ : 321.1491. Found: 321.1490.

**(E)-2-(Bis(propylthio)methyl)-1-(2-hydroxyphenyl)-5-phenylhex-4-en-1-one (5)<sup>8</sup>:**

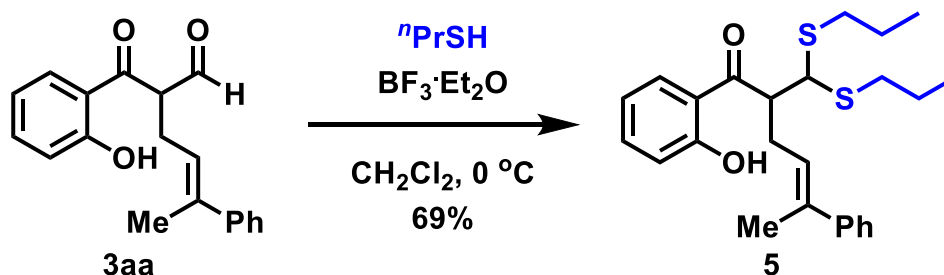

A flame-dried round-bottomed flask was charged with 3aa (0.1 mmol, 1.0 equiv., 29.4 mg),  ${}^n\text{PrSH}$  (0.22 mmol, 2.2 equiv., 16.8 mg) and  $\text{CH}_2\text{Cl}_2$  (1 mL), then cooled to 0 °C.  $\text{BF}_3 \cdot \text{Et}_2\text{O}$  (0.10 mmol, 1.0 equiv., 14.2 mg) was added dropwise and the mixture was stirred at 0 °C for 2 h. The layers were separated and the aqueous layer was extracted with  $\text{CH}_2\text{Cl}_2$  ( $2 \times 5$  mL). The combined organic layers were washed with brine (10 mL), then dried ( $\text{Na}_2\text{SO}_4$ ). After removal of the solvent, the residue was subjected to column chromatography (PE:EtOAc = 9:1) to give **5** (29.6 mg, 69% yield) as yellow oil.  $^1\text{H}$  NMR (400 MHz,  $\text{CDCl}_3$ )  $\delta$  12.35 (s, 1H), 7.92 (dd,  $J_1 = 8.1$  Hz,  $J_2 = 1.6$  Hz, 1H), 7.47 (ddd,  $J_1 = 8.6$  Hz,  $J_2 = 7.2$  Hz,  $J_3 = 1.6$  Hz, 1H), 7.49 – 7.45 (m, 5H), 6.98 (dd,  $J_1 = 8.4$  Hz,  $J_2 = 1.2$  Hz, 1H), 6.92 (ddd,  $J_1 = 8.2$  Hz,  $J_2 = 7.2$  Hz,  $J_3 = 1.2$  Hz, 1H), 5.74 (dd,  $J_1 = 10.0$  Hz,  $J_2 = 1.4$  Hz, 1H), 4.96 – 4.90 (m, 1H), 3.73 (dd,  $J_1 = 8.0$  Hz,  $J_2 = 6.6$  Hz, 1H), 2.70 – 2.50 (m, 5H), 2.25 (d,  $J = 1.4$  Hz, 3H), 2.11 – 2.04 (m, 1H), 1.64 – 1.55 (m, 4H), 1.00 (t,  $J = 17.4$  Hz, 3H), 0.93 (t,  $J = 17.4$  Hz, 3H);  $^{13}\text{C}$  NMR (100 MHz,  $\text{CDCl}_3$ )  $\delta$  206.6, 163.2, 142.6, 138.6, 136.6, 130.0, 128.3, 127.5, 125.8, 125.4, 119.0, 119.0, 118.7, 49.5, 44.8, 38.9, 32.4, 32.4, 22.8, 22.7, 16.8, 13.7, 13.6; HRMS (ESI)  $m/z$   $[\text{M}+\text{H}]^+$ : Calcd for  $\text{C}_{25}\text{H}_{33}\text{O}_2\text{S}_2$ : 429.1922. Found: 429.1927.

**1-(2-Hydroxyphenyl)-2-(3-phenylbut-2-en-1-yl)propane-1,3-diol (6)<sup>9</sup>:**

<sup>8</sup> S. Hanessian, T. Focken and R. Oza, *Tetrahedron*, 2011, **67**, 9870–9884.

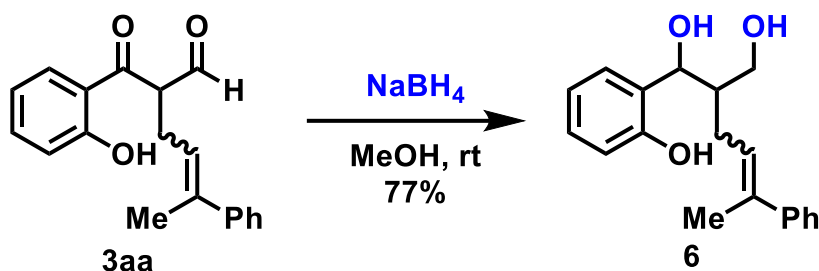

A mixture of 3aa (0.1 mmol, 1.0 equiv., 29.4 mg) in MeOH (1.00 mL) was cooled to 0 °C, NaBH<sub>4</sub> (0.4 mmol, 4.0 equiv., 15.1 mg) was added and the reaction mixture was stirred at the same temperature for 30 min under nitrogen atmosphere. The mixture was poured into H<sub>2</sub>O (5 mL) and extracted with EtOAc (10 mL). The organic layer was washed with brine (10 mL) and dried with Na<sub>2</sub>SO<sub>4</sub>. After removal of the solvent, the residue was subjected to column chromatography to give **6** (23.0 mg, 77% yield) as yellow oil. <sup>1</sup>H NMR (400 MHz, CDCl<sub>3</sub>) δ 8.40 & 8.30 (s, 1H), 7.39 – 7.12 (m, 6H), 6.99 – 6.96 (m, 1H), 6.85 – 6.79 & 6.76 – 6.72 (m, 2H), 5.68 & 5.44 (d, *J* = 10.3 Hz & 10.2 Hz, 1H), 4.77 & 4.66 (d, *J* = 6.6 Hz & 8.2 Hz, 1H), 4.13 – 4.07 & 3.85 – 3.77 (m, 1H), 3.69 – 3.63 & 3.58 – 3.52 (m, 2H), 3.13 – 3.06 (m, 1H), 2.03 & 1.92 (s, 3H), 1.79 – 1.62 (m, 2H), 1.26 – 1.23 (m, 2H); <sup>13</sup>C NMR (100 MHz, CDCl<sub>3</sub>) δ 155.7, 143.8, 143.2, 140.0, 137.9, 128.8, 128.6, 128.3, 128.3, 128.1, 127.9, 127.2, 126.8, 126.4, 125.8, 125.7, 125.2, 119.4, 119.2, 117.2, 116.8, 79.0, 78.8, 77.3, 77.0, 76.7, 60.6, 60.5, 43.3, 42.9, 34.7, 34.6, 21.0, 16.4, 16.0, 14.1; HRMS (ESI) *m/z* [M+H]<sup>+</sup>: Calcd for C<sub>19</sub>H<sub>23</sub>O<sub>3</sub>: 299.1647. Found: 299.1644.

#### 2-(1-Cyclohexyl-4-(2-phenylprop-1-en-1-yl)-1H-pyrrol-2-yl)phenol (**7**)<sup>10</sup>:

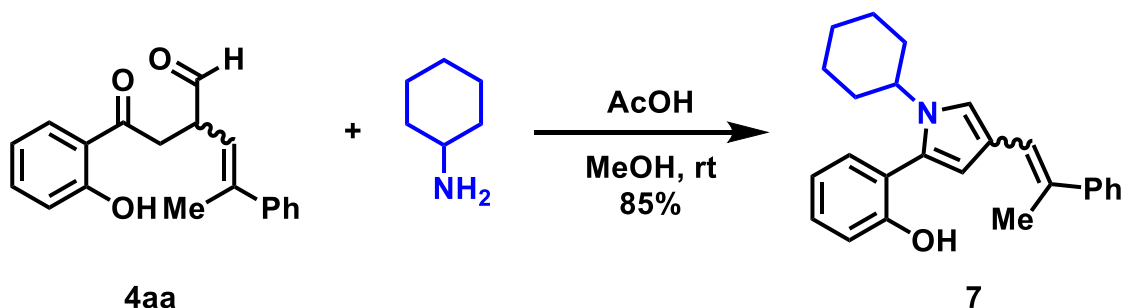

Acetic acid (0.2 mmol, 2.0 equiv., 12.0 mg) was added to the mixture of 4aa (0.1

<sup>9</sup> G. Zhong, *Angew. Chem., Int. Ed.*, 2003, **42**, 4247–4250.

<sup>10</sup> S. G. Salamone and G. B. Dudley, *Org. Lett.*, 2005, **7**, 20, 4443–4445.

mmol, 1.0equiv., 29.4 mg), cyclohexanamine (0.2 mmol, 2.0 equiv., 19.8 mg) in MeOH (1 mL). Then the reaction mixture was stirred at room temperature for 4 h. Brine (2 mL) was added, and extracted with DCM (5 ml  $\times$  3). The combined organic layer were dried over Na<sub>2</sub>SO<sub>4</sub>, and concentrated in *vacuo*. The residue was purified by flash column chromatography on silica gel give the desired product **7** as yellow oil (30.4 mg, 85% yield). <sup>1</sup>H NMR (400 MHz, CDCl<sub>3</sub>)  $\delta$  7.51 – 7.48 (m, 2H), 7.37 – 7.30 (m, 3H), 7.26 – 7.24 (m, 1H), 7.18 (dd,  $J_1 = 7.6$  Hz,  $J_2 = 1.7$  Hz, 1H), 7.09 – 6.98 (m, 3H), 6.70 (s, 1H), 6.42 (d,  $J = 1.8$  Hz, 1H), 5.72 (s, 1H), 3.78 – 3.70 (m, 1H), 2.37 (s, 3H), 1.98 – 1.95 (m, 2H), 1.84 – 1.81 (m, 2H), 1.69 – 1.63 (m, 3H), 1.27 – 1.21 (m, 3H); <sup>13</sup>C NMR (100 MHz, CDCl<sub>3</sub>)  $\delta$  154.3, 145.0, 132.5, 130.9, 130.0, 128.2, 126.5, 126.3, 125.8, 122.3, 120.9, 120.2, 119.6, 118.8, 115.4, 109.6, 55.5, 34.7, 25.7, 25.3, 18.2; HRMS (ESI)  $m/z$  [M+H]<sup>+</sup>: Calcd for C<sub>25</sub>H<sub>28</sub>NO: 358.2171. Found: 358.2176.

**2-(2-(2-Hydroxyphenyl)-2-oxoethyl)-4-phenylpent-3-enoic acid (**8**)<sup>11</sup>:**

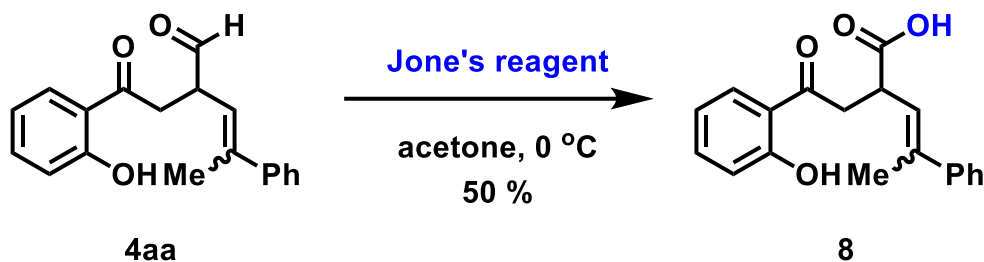

A mixture of **4aa** (0.1 mmol, 1.0 equiv., 29.4 mg) in acetone was cooled to 0 °C. Jones's reagent (2.67 M, 0.1 mL) was added dropwise and the reaction mixture was stirred at 0 °C until **4aa** was completely converted. Then the reaction mixture was quenched with 2-Propanol (2 mL). Brine (2 mL) was added, and extracted with DCM (5 ml  $\times$  3). The combined organic layer were dried over Na<sub>2</sub>SO<sub>4</sub>, and concentrated in *vacuo*. The residue was purified by flash column chromatography on silica gel give the desired product **8** as yellow oil (15.5 mg, 50% yield). <sup>1</sup>H NMR (400 MHz, CDCl<sub>3</sub>)  $\delta$  10.91 (s, 1H), 7.65 (d,  $J = 8.4$  Hz, 2H), 7.48 – 7.37 (m, 6H), 6.89 – 6.82 (m, 2H), 3.76 (d,  $J = 5.7$  Hz, 2H), 3.5 (s, 1H), 1.97 (s, 3H); <sup>13</sup>C NMR (100 MHz, CDCl<sub>3</sub>)  $\delta$  205.4, 201.3, 171.4, 162.4, 137.9, 129.8, 128.5, 128.5, 124.3, 119.4, 118.8, 117.8,

<sup>11</sup> N. Waizumi, T. Itoh and T. Fukuyama, *J. Am. Chem. Soc.*, 2000, **122**, 7825–7826.

90.0, 69.5, 44.3, 29.7, 27.8; HRMS (ESI)  $m/z$   $[M+H]^+$ : Calcd for  $C_{19}H_{19}O_4$ : 311.1283.  
Found: 311.1275.

## Computational details

In this work, the involved structures are optimized at M06/6-31G(d,p)/LANL2DZ(Zn,Br)/IEF-PCM<sub>dichloroethane</sub> level using density functional theory (DFT), followed by a single-point energy correction of the structures at M06/6-311+G(d,p)/SDD(Zn,Br)/IEF-PCM<sub>dichloroethane</sub> level. All calculations are performed by Gaussian 16 program. In addition, Laplacian bond order (LBO) were carried out for key intermediates by Multiwfn. In addition, CYLview<sup>[1]</sup> software was used for the optimized 3D structure drawing.

To understand how the reaction controls its selectivity, we calculated the Laplacian bond order (LBO) of the key intermediates. As shown in **Scheme 1**, the LBO of  $C_{\beta}$ - $C_{\alpha}$  and  $C_{\alpha}$ - $C_{\gamma}$  for intermediate **D** are 0.754/0.735, respectively, so it is difficult to occur ring opening to obtain the corresponding products. When there is only zinc catalyst in the system, it can be seen that the LBO of  $C_{\beta}$ - $C_{\alpha}$  is reduced to 0.546, while the LBO of  $C_{\alpha}$ - $C_{\gamma}$  is 0.913, so the  $C_{\beta}$ - $C_{\alpha}$  bond can be broken more easily to form  $\alpha$ -vinyl-1,4-ketoaldehyde **4aa**. With the addition of Lewis acid  $\text{BF}_3$  to this reaction, the LBO of  $C_{\alpha}$ - $C_{\gamma}$  and  $C_{\beta}$ - $C_{\alpha}$  were 0.679/0.855, respectively, and it can be seen that the  $C_{\alpha}$ - $C_{\gamma}$  bond is more easily broken to generate 1,3-dicarbonyl compound **3aa**. In summary, different Lewis acid catalysis regulate the chemoselectivity of the reaction.

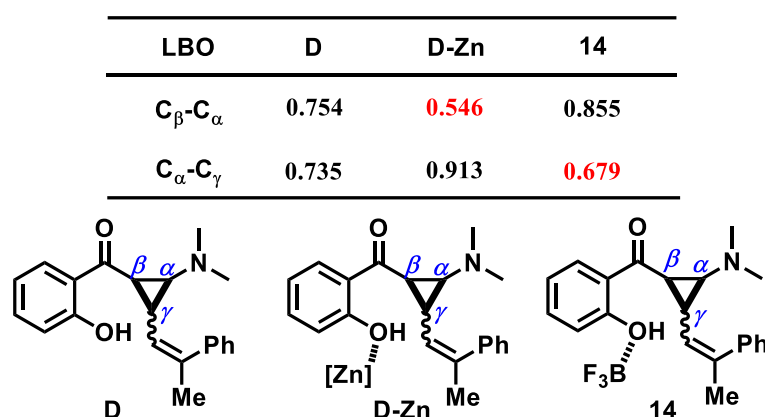

**Scheme 1.** Laplacian bond order (LBO) at different sites in intermediates **D**, **D-Zn** and **14**.

## Cartesian coordinates

### 1a

Zero-point correction= 0.220792

Thermal correction to Energy= 0.234777

Thermal correction to Enthalpy= 0.235721

Thermal correction to Gibbs Free Energy= 0.178846

Sum of electronic and zero-point Energies= -631.556272

Sum of electronic and thermal Energies= -631.542287

Sum of electronic and thermal Enthalpies= -631.541343

Sum of electronic and thermal Free Energies= -631.598218

Cartesian coordinates

|   |           |           |           |
|---|-----------|-----------|-----------|
| C | 3.743179  | 0.994249  | 0.439088  |
| C | 2.413513  | 1.332109  | 0.245390  |
| C | 1.432590  | 0.382159  | -0.064060 |
| C | 1.845576  | -0.955006 | -0.210750 |
| C | 3.186542  | -1.301006 | -0.025426 |
| C | 4.127811  | -0.337332 | 0.303215  |
| H | 4.473915  | 1.757700  | 0.691816  |
| H | 2.082036  | 2.363897  | 0.330593  |
| H | 3.484557  | -2.341803 | -0.149205 |
| H | 5.165059  | -0.630123 | 0.447515  |
| C | 0.032880  | 0.906944  | -0.225617 |
| O | -0.107703 | 2.106937  | -0.499527 |
| C | -1.086596 | 0.024765  | 0.010496  |
| C | -2.349012 | 0.537659  | -0.088085 |
| H | -0.908458 | -1.010224 | 0.276172  |
| H | -2.447187 | 1.591229  | -0.352581 |
| O | 0.941570  | -1.903172 | -0.563524 |
| H | 1.391348  | -2.753719 | -0.643203 |
| N | -3.502531 | -0.119808 | 0.101400  |
| C | -4.783847 | 0.554309  | 0.050442  |
| H | -5.447709 | 0.070179  | -0.675806 |
| H | -5.276799 | 0.540122  | 1.030868  |
| H | -4.640257 | 1.594778  | -0.249660 |
| C | -3.489461 | -1.521713 | 0.466599  |
| H | -3.039689 | -1.671529 | 1.457233  |
| H | -4.513762 | -1.899992 | 0.486569  |
| H | -2.915316 | -2.104790 | -0.263456 |

Vibrational frequencies

|           |           |           |
|-----------|-----------|-----------|
| 28.3439   | 37.8512   | 78.1701   |
| 81.3102   | 117.2030  | 138.8689  |
| 174.5981  | 214.2272  | 235.0209  |
| 252.2449  | 268.9448  | 323.4924  |
| 361.2436  | 373.6181  | 386.9926  |
| 442.0673  | 453.1241  | 517.8795  |
| 541.8509  | 563.3294  | 594.3946  |
| 649.0938  | 695.4666  | 756.5915  |
| 774.3446  | 808.5615  | 814.2852  |
| 851.9709  | 853.7523  | 919.1891  |
| 959.2154  | 982.4475  | 1003.2313 |
| 1065.5257 | 1076.9120 | 1090.9670 |
| 1105.9826 | 1107.4621 | 1133.1417 |
| 1142.8687 | 1155.3235 | 1179.0518 |



|           |           |           |
|-----------|-----------|-----------|
| 1218.8427 | 1265.3321 | 1291.4021 |
| 1312.0266 | 1325.9526 | 1371.3090 |
| 1384.9670 | 1422.6896 | 1434.2865 |
| 1443.1921 | 1449.9576 | 1453.0867 |
| 1480.0150 | 1485.8515 | 1521.5217 |
| 1533.9773 | 1632.0088 | 1656.1193 |
| 1671.7528 | 1729.2325 | 3014.3726 |
| 3020.3245 | 3092.1994 | 3094.6655 |
| 3150.6728 | 3153.5241 | 3158.6862 |
| 3160.4214 | 3180.3063 | 3190.9778 |
| 3200.7315 | 3244.0302 | 3861.6862 |

## r2

Zero-point correction= 0.164836

Thermal correction to Energy= 0.173557

Thermal correction to Enthalpy= 0.174502

Thermal correction to Gibbs Free Energy= 0.131136

Sum of electronic and zero-point Energies= -386.539952

Sum of electronic and thermal Energies= -386.531230

Sum of electronic and thermal Enthalpies= -386.530286

Sum of electronic and thermal Free Energies= -386.573652

Cartesian coordinates

|   |           |           |           |
|---|-----------|-----------|-----------|
| C | 2.269377  | -0.981134 | 0.645632  |
| C | 2.269404  | -0.981141 | -0.645617 |
| C | 1.498547  | 0.138397  | -0.000019 |
| H | 2.543832  | -1.426781 | 1.590970  |
| H | 2.543844  | -1.426997 | -1.590862 |
| C | -0.003416 | 0.062257  | 0.000001  |
| C | -0.657031 | -1.177054 | 0.000003  |
| C | -0.797378 | 1.214425  | 0.000007  |
| C | -2.043187 | -1.262136 | -0.000006 |
| H | -0.065459 | -2.090448 | -0.000004 |
| C | -2.187238 | 1.132307  | 0.000000  |
| H | -0.329798 | 2.196024  | 0.000013  |
| C | -2.819063 | -0.105681 | 0.000001  |
| H | -2.521645 | -2.239317 | 0.000007  |
| H | -2.777566 | 2.046199  | -0.000002 |
| H | -3.904505 | -0.170506 | -0.000023 |
| C | 2.093775  | 1.531566  | -0.000016 |
| H | 1.791175  | 2.106791  | -0.885039 |
| H | 1.791192  | 2.106754  | 0.885040  |
| H | 3.186189  | 1.467441  | -0.000022 |

Vibrational frequencies

|         |          |          |
|---------|----------|----------|
| 40.8888 | 139.0073 | 223.3637 |
|---------|----------|----------|

|           |           |           |
|-----------|-----------|-----------|
| 269.8629  | 340.6015  | 341.9263  |
| 372.3220  | 414.6156  | 421.8054  |
| 509.8333  | 548.8005  | 626.1868  |
| 635.6046  | 710.0488  | 712.6531  |
| 765.0337  | 827.2239  | 845.5847  |
| 855.4247  | 886.0888  | 921.4415  |
| 969.0558  | 973.0234  | 993.7451  |
| 997.7403  | 1003.9697 | 1057.1250 |
| 1073.4529 | 1090.3315 | 1108.0758 |
| 1156.8223 | 1191.4467 | 1258.9023 |
| 1285.8480 | 1330.3982 | 1371.5527 |
| 1391.0937 | 1462.3743 | 1472.0583 |
| 1480.8371 | 1531.1504 | 1646.1935 |
| 1674.8151 | 1751.0670 | 3017.5731 |
| 3092.7721 | 3127.0957 | 3165.9034 |
| 3172.5603 | 3182.1138 | 3188.6214 |
| 3195.4089 | 3241.8557 | 3291.1727 |

### **BF<sub>3</sub>**

Zero-point correction= 0.012621

Thermal correction to Energy= 0.016111

Thermal correction to Enthalpy= 0.017056

Thermal correction to Gibbs Free Energy= -0.011824

Sum of electronic and zero-point Energies= -324.447237

Sum of electronic and thermal Energies= -324.443747

Sum of electronic and thermal Enthalpies= -324.442802

Sum of electronic and thermal Free Energies= -324.471682

Cartesian coordinates

|   |           |           |          |
|---|-----------|-----------|----------|
| B | 0.000000  | 0.000000  | 0.000000 |
| F | 0.000000  | 1.309591  | 0.000000 |
| F | 1.134139  | -0.654795 | 0.000000 |
| F | -1.134139 | -0.654795 | 0.000000 |

Vibrational frequencies

|          |           |           |
|----------|-----------|-----------|
| 482.9664 | 483.0868  | 679.6603  |
| 907.3945 | 1493.4502 | 1493.5543 |

### **9**

Zero-point correction= 0.236254

Thermal correction to Energy= 0.254161

Thermal correction to Enthalpy= 0.255106

Thermal correction to Gibbs Free Energy= 0.188540

Sum of electronic and zero-point Energies= -956.042753

Sum of electronic and thermal Energies= -956.024846

Sum of electronic and thermal Enthalpies= -956.023902

Sum of electronic and thermal Free Energies= -956.090467

Cartesian coordinates

|   |           |           |           |
|---|-----------|-----------|-----------|
| C | -3.464371 | -0.689131 | 1.031370  |
| C | -2.236044 | -0.061594 | 0.921569  |
| C | -1.183742 | -0.623861 | 0.182500  |
| C | -1.412934 | -1.849798 | -0.475745 |
| C | -2.657915 | -2.471696 | -0.377489 |
| C | -3.672427 | -1.900240 | 0.374912  |
| H | -4.256506 | -0.238338 | 1.621772  |
| H | -2.063640 | 0.889833  | 1.415107  |
| H | -2.822100 | -3.411403 | -0.902593 |
| H | -4.632879 | -2.404639 | 0.444712  |
| C | 0.116758  | 0.064743  | 0.185793  |
| O | 0.175624  | 1.351173  | 0.289905  |
| C | 1.315727  | -0.660746 | 0.198477  |
| C | 2.525722  | 0.015352  | 0.182552  |
| H | 1.271530  | -1.742797 | 0.203926  |
| H | 2.507237  | 1.103055  | 0.125252  |
| O | -0.424901 | -2.392131 | -1.221577 |
| H | -0.745591 | -3.202082 | -1.638765 |
| N | 3.724842  | -0.540020 | 0.226150  |
| C | 4.939054  | 0.257930  | 0.165371  |
| H | 5.546683  | 0.086226  | 1.060024  |
| H | 5.526998  | -0.017067 | -0.716781 |
| H | 4.682965  | 1.317049  | 0.106005  |
| C | 3.878895  | -1.985633 | 0.311174  |
| H | 3.474796  | -2.470710 | -0.584094 |
| H | 4.939675  | -2.225904 | 0.393894  |
| H | 3.358679  | -2.375002 | 1.192559  |
| B | -0.740924 | 2.437260  | -0.283296 |
| F | 0.123343  | 3.413524  | -0.724317 |
| F | -1.481072 | 1.903999  | -1.313332 |
| F | -1.537298 | 2.909293  | 0.744635  |

Vibrational frequencies

|          |          |          |
|----------|----------|----------|
| 22.2081  | 28.9797  | 49.2636  |
| 64.5791  | 70.5882  | 87.3305  |
| 121.2347 | 133.0605 | 166.4899 |
| 169.7606 | 203.9285 | 227.3781 |
| 243.3608 | 262.4345 | 290.2853 |
| 297.1678 | 355.9012 | 384.4402 |
| 398.3063 | 421.3009 | 428.8030 |
| 461.8881 | 468.8122 | 495.6770 |
| 513.9691 | 537.0020 | 545.0998 |
| 575.1078 | 610.3488 | 653.5898 |

|           |           |           |
|-----------|-----------|-----------|
| 685.3936  | 723.6125  | 756.1670  |
| 776.6735  | 819.1988  | 835.2062  |
| 853.9171  | 859.0667  | 893.0418  |
| 935.5799  | 961.6444  | 986.5868  |
| 998.2143  | 1074.7223 | 1076.2948 |
| 1101.1088 | 1113.9510 | 1124.8000 |
| 1144.7360 | 1159.3097 | 1163.5070 |
| 1183.5908 | 1193.3946 | 1214.5478 |
| 1237.6264 | 1276.9889 | 1300.7000 |
| 1308.4376 | 1334.8536 | 1386.7339 |
| 1393.1411 | 1424.2152 | 1428.7654 |
| 1441.7744 | 1455.2425 | 1458.9816 |
| 1474.7399 | 1486.4203 | 1526.4524 |
| 1544.4832 | 1572.4445 | 1654.8501 |
| 1667.1954 | 1684.8265 | 3036.3245 |
| 3040.3209 | 3122.6246 | 3124.6122 |
| 3167.1139 | 3169.0810 | 3171.5816 |
| 3175.9565 | 3188.1925 | 3202.8578 |
| 3219.4924 | 3247.4817 | 3856.5937 |

### ZnBr<sub>2</sub>

Zero-point correction= 0.001372

Thermal correction to Energy= 0.005907

Thermal correction to Enthalpy= 0.006851

Thermal correction to Gibbs Free Energy= -0.028396

Sum of electronic and zero-point Energies= -91.877600

Sum of electronic and thermal Energies= -91.873065

Sum of electronic and thermal Enthalpies= -91.872121

Sum of electronic and thermal Free Energies= -91.907368

Cartesian coordinates

|    |           |           |           |
|----|-----------|-----------|-----------|
| Zn | -0.000000 | -0.000000 | 0.230874  |
| Br | 0.000000  | -2.395290 | -0.098946 |
| Br | 0.000000  | 2.395290  | -0.098946 |

Vibrational frequencies

|          |          |          |
|----------|----------|----------|
| 129.2226 | 178.6703 | 294.5472 |
|----------|----------|----------|

### A

Zero-point correction= 0.168693

Thermal correction to Energy= 0.183911

Thermal correction to Enthalpy= 0.184856

Thermal correction to Gibbs Free Energy= 0.121595

Sum of electronic and zero-point Energies= -478.418310

Sum of electronic and thermal Energies= -478.403091

Sum of electronic and thermal Enthalpies= -478.402147

Sum of electronic and thermal Free Energies= -478.465408

Cartesian coordinates

|    |           |           |           |
|----|-----------|-----------|-----------|
| C  | -1.107516 | -0.757057 | 0.116829  |
| C  | 0.108050  | -1.339809 | 0.364977  |
| C  | -2.377131 | -1.380177 | 0.199071  |
| H  | -1.100653 | 0.289529  | -0.188029 |
| H  | 0.105592  | -2.383202 | 0.691542  |
| C  | -2.511218 | -2.841906 | 0.415722  |
| H  | -3.278405 | -3.062783 | 1.163720  |
| H  | -1.575075 | -3.314603 | 0.710334  |
| C  | -3.575203 | -0.593422 | 0.023567  |
| C  | -3.551028 | 0.815029  | 0.146834  |
| C  | -4.809137 | -1.219370 | -0.262021 |
| C  | -4.707484 | 1.556242  | -0.013083 |
| H  | -2.630463 | 1.329502  | 0.407631  |
| C  | -5.956682 | -0.470642 | -0.446214 |
| H  | -4.860163 | -2.298755 | -0.370154 |
| C  | -5.908581 | 0.917765  | -0.319381 |
| H  | -4.676667 | 2.635627  | 0.101873  |
| H  | -6.893107 | -0.964644 | -0.688046 |
| Zn | 1.820839  | -0.194864 | 0.108794  |
| Br | 1.135961  | 2.255039  | 0.092414  |
| Br | 4.187046  | -0.903404 | -0.248802 |
| H  | -2.832706 | -3.316593 | -0.521197 |
| H  | -6.813207 | 1.504734  | -0.455722 |

Vibrational frequencies

|           |           |           |
|-----------|-----------|-----------|
| 34.8075   | 38.0941   | 43.1963   |
| 47.3868   | 78.5982   | 94.1028   |
| 111.4859  | 134.7767  | 150.4484  |
| 170.7723  | 203.7192  | 215.9909  |
| 247.8508  | 286.2973  | 371.1671  |
| 400.1571  | 403.5085  | 467.5440  |
| 547.8121  | 565.7752  | 616.4524  |
| 650.3293  | 676.1510  | 760.5777  |
| 773.4882  | 790.7755  | 843.7772  |
| 945.4567  | 958.9047  | 983.1987  |
| 991.4230  | 1004.1749 | 1017.6846 |
| 1025.9945 | 1054.9380 | 1082.7168 |
| 1122.6853 | 1163.0173 | 1167.9260 |
| 1199.0550 | 1297.7212 | 1344.0404 |
| 1349.7341 | 1369.5018 | 1396.6792 |
| 1398.3090 | 1430.9159 | 1460.0685 |
| 1492.7241 | 1527.6377 | 1557.8332 |
| 1628.3601 | 1660.7344 | 3045.8920 |

|           |           |           |
|-----------|-----------|-----------|
| 3125.5299 | 3140.9741 | 3160.4120 |
| 3189.3257 | 3192.7556 | 3201.2235 |
| 3205.4122 | 3212.4871 | 3217.1052 |

### 10-ts

Zero-point correction= 0.406857

Thermal correction to Energy= 0.440482

Thermal correction to Enthalpy= 0.441426

Thermal correction to Gibbs Free Energy= 0.337608

Sum of electronic and zero-point Energies= -1434.451476

Sum of electronic and thermal Energies= -1434.417851

Sum of electronic and thermal Enthalpies= -1434.416907

Sum of electronic and thermal Free Energies= -1434.520725

Cartesian coordinates

|   |           |           |           |
|---|-----------|-----------|-----------|
| C | 2.934959  | -2.061684 | -2.215560 |
| C | 1.651782  | -1.888194 | -1.734665 |
| C | 1.333046  | -2.089394 | -0.375541 |
| C | 2.375251  | -2.480585 | 0.499572  |
| C | 3.666707  | -2.668155 | 0.003400  |
| C | 3.944634  | -2.460366 | -1.337095 |
| H | 3.153459  | -1.886814 | -3.264704 |
| H | 0.861892  | -1.569249 | -2.407888 |
| H | 4.453963  | -2.979887 | 0.687274  |
| H | 4.959842  | -2.604568 | -1.698560 |
| C | -0.039355 | -1.828538 | 0.049018  |
| O | -1.011142 | -1.849167 | -0.782812 |
| C | -0.346988 | -1.387283 | 1.373147  |
| C | -1.697736 | -1.427020 | 1.777886  |
| H | 0.448648  | -1.399365 | 2.105704  |
| H | -2.446866 | -1.611573 | 1.006051  |
| O | 2.107314  | -2.700515 | 1.801693  |
| H | 2.904319  | -3.006561 | 2.254320  |
| N | -2.166455 | -1.220445 | 2.984024  |
| C | -3.603209 | -1.234546 | 3.245186  |
| H | -3.847722 | -2.075002 | 3.902512  |
| H | -3.884533 | -0.300038 | 3.741559  |
| H | -4.150948 | -1.314675 | 2.304620  |
| C | -1.336288 | -0.953719 | 4.151693  |
| H | -1.395753 | 0.108086  | 4.416262  |
| H | -1.714657 | -1.541996 | 4.992329  |
| H | -0.298856 | -1.235475 | 3.972079  |
| B | -1.336182 | -2.722925 | -2.031006 |
| F | -0.527392 | -3.829423 | -2.001228 |
| F | -2.660361 | -3.029278 | -1.870838 |

|                         |           |           |           |
|-------------------------|-----------|-----------|-----------|
| F                       | -1.116438 | -1.927314 | -3.135631 |
| C                       | 1.193334  | 1.011397  | 0.572903  |
| C                       | -0.134226 | 0.843034  | 1.038752  |
| C                       | 2.317907  | 1.205972  | 1.346905  |
| H                       | 1.326280  | 1.055656  | -0.509331 |
| H                       | -0.261975 | 0.942281  | 2.120192  |
| C                       | 2.275711  | 1.218066  | 2.838514  |
| H                       | 3.102055  | 0.629546  | 3.251505  |
| H                       | 1.337822  | 0.832145  | 3.241741  |
| C                       | 3.619520  | 1.444431  | 0.714827  |
| C                       | 3.893989  | 0.974121  | -0.581017 |
| C                       | 4.639095  | 2.125416  | 1.401924  |
| C                       | 5.133539  | 1.179747  | -1.166439 |
| H                       | 3.146789  | 0.397278  | -1.121067 |
| C                       | 5.872376  | 2.349016  | 0.806148  |
| H                       | 4.460955  | 2.504269  | 2.405059  |
| C                       | 6.125297  | 1.875409  | -0.478908 |
| H                       | 5.327403  | 0.785550  | -2.161482 |
| H                       | 6.641537  | 2.892747  | 1.348458  |
| Zn                      | -1.721671 | 1.348372  | -0.190947 |
| Br                      | -4.128514 | 0.601666  | -0.041625 |
| Br                      | -1.387581 | 3.449502  | -1.516567 |
| H                       | 2.392494  | 2.240788  | 3.219736  |
| H                       | 7.095689  | 2.041376  | -0.940034 |
| Vibrational frequencies |           |           |           |
| -276.1164               | 22.4793   | 28.1078   |           |
| 32.4137                 | 38.3057   | 43.8729   |           |
| 49.2649                 | 56.8289   | 58.5548   |           |
| 62.8695                 | 68.3214   | 70.4230   |           |
| 77.0161                 | 83.1223   | 85.1172   |           |
| 91.2179                 | 96.2962   | 101.7684  |           |
| 105.7075                | 119.3931  | 136.2858  |           |
| 144.6175                | 147.6214  | 176.0817  |           |
| 180.4184                | 214.0095  | 228.8308  |           |
| 230.7372                | 240.1751  | 250.9245  |           |
| 254.5763                | 267.1066  | 275.0483  |           |
| 282.2233                | 296.4433  | 342.8155  |           |
| 365.5677                | 368.9742  | 394.7546  |           |
| 409.1988                | 411.7188  | 419.7196  |           |
| 433.0878                | 456.2359  | 457.3236  |           |
| 476.3744                | 480.0304  | 507.0086  |           |
| 512.6483                | 537.3693  | 540.1426  |           |
| 553.2991                | 577.0792  | 578.3827  |           |
| 613.6332                | 621.7200  | 646.7137  |           |

|           |           |           |
|-----------|-----------|-----------|
| 658.0646  | 675.9933  | 695.1816  |
| 709.8119  | 764.7689  | 767.5054  |
| 772.8319  | 782.7472  | 824.8979  |
| 834.1493  | 850.6547  | 856.5360  |
| 860.1176  | 868.5365  | 912.5335  |
| 931.9244  | 941.1668  | 957.7294  |
| 980.0509  | 980.9074  | 984.5232  |
| 997.5924  | 1001.7530 | 1005.0996 |
| 1006.0948 | 1037.6665 | 1053.6166 |
| 1055.3355 | 1082.4063 | 1084.1612 |
| 1101.4877 | 1112.9096 | 1119.5844 |
| 1127.7706 | 1147.0152 | 1151.9453 |
| 1159.1344 | 1161.0456 | 1173.9058 |
| 1189.9165 | 1192.6694 | 1208.2472 |
| 1220.2467 | 1237.2665 | 1254.1830 |
| 1270.2183 | 1287.7496 | 1311.1211 |
| 1321.6316 | 1324.8817 | 1357.4735 |
| 1361.5589 | 1383.1965 | 1396.4751 |
| 1403.5011 | 1406.2608 | 1414.9279 |
| 1425.7540 | 1426.9102 | 1444.8566 |
| 1450.6491 | 1453.6603 | 1458.6866 |
| 1462.1729 | 1476.5910 | 1486.9767 |
| 1524.6608 | 1525.1123 | 1541.8824 |
| 1563.4848 | 1578.2155 | 1640.5874 |
| 1646.8979 | 1664.9935 | 1673.4491 |
| 1696.8507 | 3044.2730 | 3044.5668 |
| 3049.3192 | 3117.2806 | 3132.6706 |
| 3135.7223 | 3139.6814 | 3149.1633 |
| 3164.7562 | 3168.7721 | 3174.9571 |
| 3177.4030 | 3177.5640 | 3185.4811 |
| 3186.1804 | 3193.9685 | 3194.5698 |
| 3197.9330 | 3203.7749 | 3208.1885 |
| 3220.3995 | 3280.3684 | 3849.4771 |

## 11

Zero-point correction= 0.406628

Thermal correction to Energy= 0.433294

Thermal correction to Enthalpy= 0.434238

Thermal correction to Gibbs Free Energy= 0.348972

Sum of electronic and zero-point Energies= -1342.625190

Sum of electronic and thermal Energies= -1342.598524

Sum of electronic and thermal Enthalpies= -1342.597580

Sum of electronic and thermal Free Energies= -1342.682847

Cartesian coordinates



|   |           |           |           |
|---|-----------|-----------|-----------|
| C | 0.380654  | -1.610756 | -0.511673 |
| C | -1.064778 | -1.676579 | -0.802134 |
| C | 1.287899  | -0.983251 | -1.285652 |
| H | 0.707660  | -2.054724 | 0.429241  |
| H | -1.347710 | -1.900586 | -1.831939 |
| C | 0.903800  | -0.239231 | -2.531795 |
| H | 0.955153  | 0.847303  | -2.370781 |
| H | -0.118604 | -0.460846 | -2.848910 |
| C | 2.715877  | -0.965170 | -0.901743 |
| C | 3.292921  | -2.026319 | -0.190525 |
| C | 3.533756  | 0.120991  | -1.241315 |
| C | 4.628335  | -1.992214 | 0.187520  |
| H | 2.690554  | -2.901159 | 0.045227  |
| C | 4.870189  | 0.157071  | -0.860563 |
| H | 3.116956  | 0.959974  | -1.795404 |
| C | 5.423645  | -0.898321 | -0.143253 |
| H | 5.054017  | -2.830732 | 0.733664  |
| H | 5.481670  | 1.016182  | -1.126336 |
| H | 1.583235  | -0.472196 | -3.359757 |
| H | 6.470352  | -0.873190 | 0.149582  |
| C | 0.510628  | 3.382312  | -0.774739 |
| C | 0.188959  | 2.248986  | -0.049526 |
| C | -1.121675 | 1.741438  | -0.046073 |
| C | -2.119858 | 2.424037  | -0.769780 |
| C | -1.795123 | 3.580467  | -1.476079 |
| C | -0.488679 | 4.046188  | -1.485754 |
| H | 1.533265  | 3.747230  | -0.788479 |
| H | 0.959741  | 1.707928  | 0.492318  |
| H | -2.575928 | 4.110277  | -2.017973 |
| H | -0.250197 | 4.942439  | -2.052500 |
| C | -1.344041 | 0.428628  | 0.559330  |
| O | -0.773586 | 0.049387  | 1.614545  |
| C | -2.043997 | -0.590215 | -0.210613 |
| C | -2.076656 | -2.009727 | 0.248929  |
| H | -2.765105 | -0.227842 | -0.933561 |
| H | -1.637625 | -2.157846 | 1.238422  |
| O | -3.380937 | 1.950058  | -0.718085 |
| H | -3.967212 | 2.506448  | -1.247824 |
| N | -3.212432 | -2.857678 | 0.030939  |
| C | -2.782088 | -4.244419 | -0.025330 |
| H | -3.656957 | -4.903448 | -0.036743 |
| H | -2.170476 | -4.464531 | -0.921398 |
| H | -2.183525 | -4.485317 | 0.860398  |
| C | -4.060056 | -2.523278 | -1.095572 |

|   |           |           |           |
|---|-----------|-----------|-----------|
| H | -3.546276 | -2.575630 | -2.075497 |
| H | -4.891073 | -3.235579 | -1.128980 |
| H | -4.490688 | -1.524332 | -0.976744 |
| B | 0.073594  | 0.782599  | 2.733721  |
| F | 1.380240  | 0.656588  | 2.329901  |
| F | -0.354302 | 2.076719  | 2.812324  |
| F | -0.207521 | 0.055753  | 3.851679  |

Vibrational frequencies

|           |           |           |
|-----------|-----------|-----------|
| 14.9169   | 33.2463   | 41.5888   |
| 48.9673   | 58.2387   | 68.5987   |
| 72.5521   | 79.1151   | 95.2295   |
| 100.3092  | 104.6056  | 126.4962  |
| 143.6853  | 152.4564  | 181.5768  |
| 186.9145  | 194.1185  | 213.6862  |
| 237.2631  | 250.8522  | 255.2342  |
| 260.7562  | 284.5583  | 298.0766  |
| 322.3385  | 343.0961  | 363.9588  |
| 385.6102  | 389.3606  | 396.7085  |
| 415.3479  | 420.1905  | 427.9046  |
| 454.9728  | 470.1646  | 483.6708  |
| 499.9043  | 513.0967  | 529.1938  |
| 537.3990  | 560.5389  | 567.9453  |
| 573.2549  | 590.8431  | 611.3502  |
| 626.1380  | 640.5902  | 678.0481  |
| 706.4190  | 711.0553  | 728.7801  |
| 768.5870  | 771.5145  | 777.0894  |
| 812.5425  | 843.8030  | 856.1303  |
| 861.2954  | 865.0738  | 868.8927  |
| 879.3355  | 910.0206  | 922.9508  |
| 935.8319  | 948.7749  | 976.3127  |
| 981.7509  | 985.1805  | 998.2409  |
| 1005.7636 | 1010.4113 | 1036.7904 |
| 1054.3895 | 1057.5018 | 1065.4557 |
| 1075.8996 | 1081.3648 | 1088.9370 |
| 1102.2764 | 1108.5777 | 1110.4397 |
| 1117.0578 | 1129.5437 | 1157.9403 |
| 1163.8414 | 1166.5470 | 1175.7090 |
| 1188.4415 | 1194.8826 | 1214.0199 |
| 1231.4387 | 1234.8623 | 1261.6907 |
| 1270.1397 | 1271.5192 | 1312.7119 |
| 1315.7663 | 1319.2221 | 1337.4268 |
| 1344.2512 | 1354.6411 | 1373.1687 |
| 1389.8714 | 1400.0048 | 1402.8747 |
| 1417.0170 | 1443.5769 | 1448.3650 |

|           |           |           |
|-----------|-----------|-----------|
| 1452.9343 | 1457.3918 | 1466.5475 |
| 1468.6133 | 1477.1664 | 1480.8147 |
| 1492.3375 | 1503.6288 | 1529.6897 |
| 1539.7650 | 1633.9459 | 1642.2524 |
| 1655.5421 | 1671.2332 | 1675.6077 |
| 1705.9273 | 2940.2778 | 2948.9607 |
| 3025.2279 | 3070.9068 | 3079.7003 |
| 3098.3917 | 3123.0736 | 3124.4845 |
| 3130.4708 | 3140.7262 | 3145.1557 |
| 3155.3923 | 3170.7585 | 3175.1004 |
| 3178.4718 | 3182.5580 | 3187.8279 |
| 3191.8365 | 3197.4195 | 3204.1108 |
| 3213.9683 | 3245.8911 | 3856.5380 |

## 12

Zero-point correction= 0.235535

Thermal correction to Energy= 0.253755

Thermal correction to Enthalpy= 0.254699

Thermal correction to Gibbs Free Energy= 0.187930

Sum of electronic and zero-point Energies= -956.016647

Sum of electronic and thermal Energies= -955.998427

Sum of electronic and thermal Enthalpies= -955.997482

Sum of electronic and thermal Free Energies= -956.064251

Cartesian coordinates

|   |           |           |           |
|---|-----------|-----------|-----------|
| C | -3.547030 | -2.012178 | 0.094310  |
| C | -2.194653 | -2.193685 | -0.151961 |
| C | -1.248641 | -1.185489 | 0.069880  |
| C | -1.754021 | 0.028214  | 0.540055  |
| C | -3.103477 | 0.248004  | 0.768346  |
| C | -4.007942 | -0.784144 | 0.557439  |
| H | -4.244171 | -2.826918 | -0.080993 |
| H | -1.816778 | -3.138591 | -0.531870 |
| H | -3.436957 | 1.229578  | 1.098945  |
| H | -5.065718 | -0.621239 | 0.743568  |
| C | 0.188446  | -1.538868 | -0.256497 |
| O | 0.373294  | -2.558679 | -0.931487 |
| C | 1.264958  | -0.722384 | 0.239341  |
| C | 2.548600  | -1.065712 | -0.090955 |
| H | 1.059753  | 0.148605  | 0.846986  |
| H | 2.697954  | -1.964485 | -0.690036 |
| O | -0.880535 | 1.110382  | 0.768437  |
| H | -1.182289 | 1.621125  | 1.536717  |
| N | 3.660607  | -0.398039 | 0.236455  |
| C | 4.979465  | -0.906689 | -0.084157 |

|   |           |           |           |
|---|-----------|-----------|-----------|
| H | 5.550813  | -0.162537 | -0.651221 |
| H | 5.538658  | -1.150014 | 0.827940  |
| H | 4.888578  | -1.812324 | -0.687953 |
| C | 3.580652  | 0.823863  | 1.014183  |
| H | 3.288321  | 0.617981  | 2.052554  |
| H | 4.557301  | 1.312759  | 1.016716  |
| H | 2.845135  | 1.507664  | 0.575115  |
| B | -0.556396 | 2.208663  | -0.542131 |
| F | -1.623315 | 3.033489  | -0.470588 |
| F | 0.616261  | 2.739285  | -0.139187 |
| F | -0.515510 | 1.385241  | -1.600947 |

Vibrational frequencies

|           |           |           |
|-----------|-----------|-----------|
| 21.9094   | 39.4475   | 50.7400   |
| 76.1259   | 83.0602   | 93.0199   |
| 107.8816  | 116.7843  | 153.0330  |
| 178.6581  | 192.5623  | 196.1604  |
| 232.9904  | 248.1684  | 270.7567  |
| 280.3679  | 321.8243  | 338.0242  |
| 368.1554  | 402.7604  | 445.2238  |
| 448.1157  | 456.4078  | 483.9846  |
| 497.5063  | 534.0417  | 577.7088  |
| 581.9296  | 591.5784  | 643.8431  |
| 649.9902  | 688.5158  | 759.7195  |
| 785.0285  | 803.6551  | 837.3097  |
| 843.5576  | 870.9404  | 875.5143  |
| 918.4368  | 964.4804  | 1000.7596 |
| 1008.1577 | 1064.2529 | 1078.6799 |
| 1093.0005 | 1106.9041 | 1111.4452 |
| 1137.8772 | 1144.7477 | 1156.5134 |
| 1199.4254 | 1221.3803 | 1230.9381 |
| 1266.8985 | 1295.1153 | 1312.5225 |
| 1319.2092 | 1361.1454 | 1378.1669 |
| 1384.4590 | 1425.9180 | 1434.8527 |
| 1444.5185 | 1455.6074 | 1457.0805 |
| 1478.5459 | 1481.6420 | 1519.1155 |
| 1529.3449 | 1632.4622 | 1650.9285 |
| 1681.1600 | 1733.4536 | 3018.7382 |
| 3023.7543 | 3097.8107 | 3106.1366 |
| 3154.2788 | 3155.7256 | 3166.0738 |
| 3181.0660 | 3189.4302 | 3201.9068 |
| 3207.8768 | 3260.4782 | 3798.4749 |

**13-ts**

Zero-point correction= 0.407322

Thermal correction to Energy= 0.439998  
 Thermal correction to Enthalpy= 0.440943  
 Thermal correction to Gibbs Free Energy= 0.340778  
 Sum of electronic and zero-point Energies= -1434.442667  
 Sum of electronic and thermal Energies= -1434.409990  
 Sum of electronic and thermal Enthalpies= -1434.409046  
 Sum of electronic and thermal Free Energies= -1434.509211

Cartesian coordinates

|   |           |           |           |
|---|-----------|-----------|-----------|
| C | -1.294939 | 4.982917  | -0.649960 |
| C | -0.509524 | 4.059047  | 0.023631  |
| C | -0.953515 | 2.757255  | 0.291795  |
| C | -2.244096 | 2.444234  | -0.154065 |
| C | -3.051655 | 3.353507  | -0.817639 |
| C | -2.571966 | 4.631309  | -1.077274 |
| H | -0.911808 | 5.982219  | -0.838303 |
| H | 0.487044  | 4.319748  | 0.369383  |
| H | -4.051713 | 3.044766  | -1.110038 |
| H | -3.198325 | 5.348553  | -1.600346 |
| C | 0.025169  | 1.858186  | 1.011378  |
| O | 1.140151  | 2.313858  | 1.292985  |
| C | -0.314809 | 0.479759  | 1.291080  |
| C | 0.587231  | -0.280658 | 2.033886  |
| H | -1.316207 | 0.113395  | 1.124366  |
| H | 1.580349  | 0.144258  | 2.190055  |
| O | -2.801230 | 1.185966  | 0.116373  |
| H | -2.891541 | 0.561120  | -0.648939 |
| N | 0.388631  | -1.476791 | 2.551574  |
| C | 1.484045  | -2.236257 | 3.136762  |
| H | 1.225274  | -2.537260 | 4.157329  |
| H | 1.660584  | -3.136284 | 2.534201  |
| H | 2.392481  | -1.630957 | 3.156535  |
| C | -0.887124 | -2.179098 | 2.515858  |
| H | -0.826188 | -3.018360 | 1.809968  |
| H | -1.089633 | -2.581290 | 3.513886  |
| H | -1.705198 | -1.513613 | 2.236403  |
| B | -3.829343 | 0.972694  | 1.392462  |
| F | -5.035389 | 1.405371  | 0.955168  |
| F | -3.740063 | -0.371411 | 1.591464  |
| F | -3.262020 | 1.734148  | 2.357113  |
| C | 2.048221  | 0.034865  | -0.654266 |
| C | 0.678721  | -0.101871 | -0.899410 |
| C | 2.818853  | 1.167625  | -0.873644 |
| H | 2.561064  | -0.839740 | -0.246197 |
| H | 0.170756  | 0.780541  | -1.303352 |

|    |           |           |           |
|----|-----------|-----------|-----------|
| C  | 2.306987  | 2.364077  | -1.600376 |
| H  | 2.629976  | 3.285817  | -1.106771 |
| H  | 1.219567  | 2.378115  | -1.688361 |
| C  | 4.230494  | 1.173144  | -0.484755 |
| C  | 4.700406  | 0.348858  | 0.553851  |
| C  | 5.151044  | 2.022760  | -1.122541 |
| C  | 6.034721  | 0.364011  | 0.928042  |
| H  | 4.007085  | -0.288718 | 1.096749  |
| C  | 6.489603  | 2.025307  | -0.757852 |
| H  | 4.822946  | 2.672855  | -1.929129 |
| C  | 6.936097  | 1.196708  | 0.268165  |
| H  | 6.373443  | -0.271734 | 1.741772  |
| H  | 7.187677  | 2.677633  | -1.275826 |
| Zn | -0.346491 | -1.877045 | -1.023220 |
| Br | 0.682533  | -4.081502 | -0.413395 |
| Br | -2.755752 | -1.432615 | -1.798962 |
| H  | 2.714430  | 2.378803  | -2.620327 |
| H  | 7.983750  | 1.203953  | 0.558148  |

Vibrational frequencies

|           |          |          |
|-----------|----------|----------|
| -127.7139 | 25.5760  | 26.6409  |
| 37.2461   | 39.7054  | 44.4377  |
| 53.8273   | 55.6345  | 58.9556  |
| 72.6296   | 79.6495  | 82.5548  |
| 89.5123   | 97.7541  | 108.0817 |
| 112.4257  | 119.1255 | 128.6356 |
| 140.4924  | 151.7879 | 157.0920 |
| 180.0212  | 192.2806 | 199.3056 |
| 213.0865  | 219.7034 | 237.3884 |
| 245.1088  | 251.6409 | 255.7374 |
| 280.6488  | 286.9400 | 296.7795 |
| 318.4489  | 329.2036 | 343.9485 |
| 361.4095  | 365.1166 | 395.9295 |
| 406.4050  | 412.2123 | 415.1845 |
| 437.9507  | 459.7573 | 462.3314 |
| 478.1530  | 484.6221 | 492.6672 |
| 515.3077  | 536.9811 | 549.7795 |
| 573.7278  | 581.0058 | 598.6461 |
| 611.1054  | 612.9574 | 623.4970 |
| 647.7078  | 667.6834 | 694.7992 |
| 696.2150  | 766.7241 | 769.8885 |
| 774.3651  | 798.6823 | 807.3664 |
| 838.0785  | 849.2971 | 860.4038 |
| 870.9895  | 879.9498 | 895.4782 |
| 910.9564  | 941.1558 | 958.6230 |

|           |           |           |
|-----------|-----------|-----------|
| 979.2335  | 981.3792  | 982.5326  |
| 1006.9380 | 1007.3561 | 1008.5093 |
| 1019.5823 | 1035.2299 | 1056.3951 |
| 1062.8221 | 1065.8701 | 1084.7224 |
| 1090.0960 | 1113.1787 | 1114.6604 |
| 1118.9088 | 1140.5090 | 1156.7747 |
| 1159.8835 | 1161.6069 | 1162.8794 |
| 1195.3043 | 1212.1552 | 1222.2174 |
| 1247.8961 | 1255.6101 | 1276.7479 |
| 1278.4974 | 1288.6997 | 1294.9689 |
| 1326.0182 | 1337.5870 | 1346.2537 |
| 1362.0521 | 1369.1345 | 1377.2105 |
| 1384.9569 | 1402.5944 | 1417.4007 |
| 1429.9684 | 1439.8255 | 1449.7747 |
| 1453.0660 | 1454.6570 | 1464.2681 |
| 1479.0803 | 1481.4306 | 1495.8147 |
| 1515.7912 | 1520.6612 | 1527.9773 |
| 1558.8771 | 1638.1680 | 1640.7126 |
| 1659.8826 | 1666.0622 | 1674.3047 |
| 1717.7733 | 3032.4114 | 3038.4594 |
| 3039.5000 | 3117.3830 | 3120.7013 |
| 3123.1109 | 3123.3345 | 3134.0119 |
| 3163.1354 | 3167.7729 | 3170.6623 |
| 3177.1196 | 3184.7730 | 3190.1335 |
| 3192.4449 | 3200.0524 | 3200.7379 |
| 3207.2072 | 3208.5343 | 3212.3913 |
| 3212.8626 | 3306.2461 | 3363.0471 |

#### 14

Zero-point correction= 0.406017

Thermal correction to Energy= 0.432945

Thermal correction to Enthalpy= 0.433889

Thermal correction to Gibbs Free Energy= 0.347242

Sum of electronic and zero-point Energies= -1342.619156

Sum of electronic and thermal Energies= -1342.592229

Sum of electronic and thermal Enthalpies= -1342.591284

Sum of electronic and thermal Free Energies= -1342.677931

Cartesian coordinates

|   |          |           |           |
|---|----------|-----------|-----------|
| C | 2.482976 | -3.691097 | 1.674055  |
| C | 1.933891 | -2.500484 | 2.122133  |
| C | 1.544759 | -1.496391 | 1.227874  |
| C | 1.677471 | -1.768858 | -0.136431 |
| C | 2.209381 | -2.956370 | -0.608063 |
| C | 2.629002 | -3.913859 | 0.306724  |

|   |           |           |           |
|---|-----------|-----------|-----------|
| H | 2.796982  | -4.447257 | 2.387455  |
| H | 1.809154  | -2.304317 | 3.183814  |
| H | 2.275004  | -3.116307 | -1.679934 |
| H | 3.055673  | -4.845441 | -0.053979 |
| C | 1.011277  | -0.224029 | 1.801053  |
| O | 0.432475  | -0.227342 | 2.874214  |
| C | 1.218665  | 1.018096  | 1.004721  |
| C | 0.609547  | 2.290571  | 1.442973  |
| H | 2.142970  | 1.043998  | 0.431052  |
| H | 0.008582  | 2.202381  | 2.351166  |
| O | 1.232241  | -0.871082 | -1.116176 |
| H | 0.602407  | -0.216844 | -0.751297 |
| N | 1.290452  | 3.544859  | 1.347610  |
| C | 0.329764  | 4.624378  | 1.195656  |
| H | 0.838943  | 5.589596  | 1.289027  |
| H | -0.187551 | 4.598778  | 0.217608  |
| H | -0.430109 | 4.559674  | 1.982328  |
| C | 2.346186  | 3.630163  | 0.357268  |
| H | 2.001414  | 3.467053  | -0.682995 |
| H | 2.782095  | 4.633519  | 0.399716  |
| H | 3.146771  | 2.915835  | 0.573192  |
| B | 2.354054  | -0.071457 | -2.137408 |
| F | 2.639891  | -1.001291 | -3.064024 |
| F | 1.585053  | 0.970071  | -2.541040 |
| F | 3.368540  | 0.253670  | -1.303609 |
| C | -1.314032 | 0.926654  | 0.349946  |
| C | -0.014344 | 1.604980  | 0.241739  |
| C | -2.159443 | 0.623987  | -0.655351 |
| H | -1.601655 | 0.653269  | 1.366265  |
| H | 0.260064  | 2.025802  | -0.726285 |
| C | -1.911403 | 1.003290  | -2.087708 |
| H | -2.227476 | 0.199789  | -2.762355 |
| H | -0.859567 | 1.216407  | -2.296662 |
| C | -3.421917 | -0.089874 | -0.359900 |
| C | -3.507473 | -1.011160 | 0.693880  |
| C | -4.565339 | 0.123776  | -1.140531 |
| C | -4.696921 | -1.670277 | 0.973374  |
| H | -2.618958 | -1.234314 | 1.282665  |
| C | -5.757504 | -0.534071 | -0.859664 |
| H | -4.529238 | 0.826542  | -1.970277 |
| C | -5.830174 | -1.432099 | 0.199943  |
| H | -4.735410 | -2.385615 | 1.791590  |
| H | -6.634269 | -0.342868 | -1.474039 |
| H | -2.484282 | 1.897072  | -2.368293 |



| H                       | -6.760265 | -1.952091 | 0.415629  |
|-------------------------|-----------|-----------|-----------|
| Vibrational frequencies |           |           |           |
| 13.5480                 |           | 28.7080   | 36.1712   |
| 39.6177                 |           | 49.2632   | 55.3910   |
| 77.0964                 |           | 83.1552   | 85.9423   |
| 95.8766                 |           | 108.1330  | 118.5955  |
| 139.6409                |           | 147.9655  | 168.1895  |
| 188.4486                |           | 189.7852  | 218.9977  |
| 243.5193                |           | 255.4565  | 261.7251  |
| 266.4303                |           | 283.0210  | 292.8375  |
| 307.4023                |           | 329.6477  | 354.0841  |
| 364.7383                |           | 374.8102  | 389.9828  |
| 413.4865                |           | 420.0457  | 440.2397  |
| 448.4056                |           | 468.6194  | 481.6217  |
| 485.1175                |           | 494.6546  | 528.5470  |
| 551.3858                |           | 554.7830  | 564.1114  |
| 579.2167                |           | 586.0794  | 606.2050  |
| 626.2258                |           | 628.8247  | 643.4702  |
| 694.3908                |           | 706.6118  | 734.8300  |
| 768.1091                |           | 771.6076  | 775.0700  |
| 810.6019                |           | 827.3512  | 852.1759  |
| 853.7988                |           | 863.0924  | 877.5814  |
| 884.4958                |           | 900.6567  | 928.8405  |
| 933.0375                |           | 959.8731  | 970.7687  |
| 975.2282                |           | 985.8025  | 997.6466  |
| 1001.8247               |           | 1005.6469 | 1038.7123 |
| 1052.0413               |           | 1053.9727 | 1059.7327 |
| 1066.6112               |           | 1073.5226 | 1088.4069 |
| 1096.3137               |           | 1102.0319 | 1106.3395 |
| 1109.8334               |           | 1119.3606 | 1157.9720 |
| 1158.3992               |           | 1163.1401 | 1181.7028 |
| 1190.6549               |           | 1211.5644 | 1215.8298 |
| 1235.1922               |           | 1238.8757 | 1262.2736 |
| 1271.7067               |           | 1294.2564 | 1318.5193 |
| 1322.3938               |           | 1323.0476 | 1337.6734 |
| 1358.3430               |           | 1361.1938 | 1369.5716 |
| 1384.9534               |           | 1404.2881 | 1410.1092 |
| 1418.0394               |           | 1443.7467 | 1451.4221 |
| 1460.7939               |           | 1465.5867 | 1469.1317 |
| 1470.4420               |           | 1478.2520 | 1481.0490 |
| 1492.6554               |           | 1498.0488 | 1518.3545 |
| 1530.0499               |           | 1642.9538 | 1647.2841 |
| 1670.8502               |           | 1685.7520 | 1718.2458 |
| 1794.1219               |           | 2945.4449 | 2952.1062 |

|           |           |           |
|-----------|-----------|-----------|
| 3033.4366 | 3072.8748 | 3081.4750 |
| 3105.7941 | 3123.4554 | 3125.4438 |
| 3131.3312 | 3146.4452 | 3149.7404 |
| 3163.6433 | 3167.1849 | 3172.8686 |
| 3180.9451 | 3187.7099 | 3189.4997 |
| 3191.4649 | 3197.0529 | 3199.5285 |
| 3207.9868 | 3216.7428 | 3635.2700 |

### 15-ts

Zero-point correction= 0.401652

Thermal correction to Energy= 0.428121

Thermal correction to Enthalpy= 0.429065

Thermal correction to Gibbs Free Energy= 0.343478

Sum of electronic and zero-point Energies= -1342.599453

Sum of electronic and thermal Energies= -1342.572985

Sum of electronic and thermal Enthalpies= -1342.572040

Sum of electronic and thermal Free Energies= -1342.657627

Cartesian coordinates

|   |           |           |           |
|---|-----------|-----------|-----------|
| C | 2.697947  | -3.674971 | 1.376579  |
| C | 2.043792  | -2.570193 | 1.890992  |
| C | 1.735797  | -1.459154 | 1.091638  |
| C | 2.084682  | -1.522302 | -0.267652 |
| C | 2.729174  | -2.632009 | -0.797815 |
| C | 3.047413  | -3.700899 | 0.027177  |
| H | 2.936973  | -4.515790 | 2.021090  |
| H | 1.760807  | -2.525143 | 2.939132  |
| H | 2.970450  | -2.632929 | -1.856104 |
| H | 3.562361  | -4.562675 | -0.388659 |
| C | 1.070187  | -0.315115 | 1.775138  |
| O | 0.580074  | -0.434368 | 2.883652  |
| C | 1.013484  | 1.004811  | 1.045667  |
| C | 0.191911  | 2.059409  | 1.567968  |
| H | 1.997461  | 1.286371  | 0.661024  |
| H | -0.682970 | 1.779431  | 2.151527  |
| O | 1.768128  | -0.508832 | -1.153078 |
| H | 0.905836  | 0.098148  | -0.812690 |
| N | 0.438810  | 3.373574  | 1.450152  |
| C | -0.713027 | 4.260575  | 1.383842  |
| H | -0.430936 | 5.262656  | 1.717080  |
| H | -1.094254 | 4.319184  | 0.351869  |
| H | -1.509790 | 3.882434  | 2.029388  |
| C | 1.620621  | 3.839513  | 0.744121  |
| H | 1.539550  | 3.673408  | -0.341875 |
| H | 1.733344  | 4.911487  | 0.920847  |

|   |           |           |           |
|---|-----------|-----------|-----------|
| H | 2.517332  | 3.336695  | 1.114296  |
| B | 2.914685  | 0.436551  | -1.743765 |
| F | 3.584071  | -0.302716 | -2.666645 |
| F | 2.194598  | 1.478270  | -2.258164 |
| F | 3.690386  | 0.797906  | -0.670269 |
| C | -1.309463 | 0.301085  | 0.055990  |
| C | -0.047277 | 1.012685  | -0.072894 |
| C | -2.366078 | 0.399273  | -0.781443 |
| H | -1.396872 | -0.366971 | 0.917087  |
| H | 0.045587  | 1.819229  | -0.801483 |
| C | -2.337703 | 1.346198  | -1.949452 |
| H | -3.046145 | 1.049122  | -2.729099 |
| H | -1.345270 | 1.380667  | -2.413046 |
| C | -3.593165 | -0.378258 | -0.535067 |
| C | -3.562278 | -1.630820 | 0.098794  |
| C | -4.845857 | 0.119283  | -0.925714 |
| C | -4.729258 | -2.338277 | 0.353321  |
| H | -2.603123 | -2.068683 | 0.369196  |
| C | -6.014612 | -0.589579 | -0.672946 |
| H | -4.909236 | 1.088434  | -1.417010 |
| C | -5.965034 | -1.821761 | -0.029076 |
| H | -4.671918 | -3.309445 | 0.840226  |
| H | -6.971555 | -0.172625 | -0.979416 |
| H | -2.589242 | 2.376182  | -1.653723 |
| H | -6.878112 | -2.379461 | 0.164183  |

Vibrational frequencies

|           |          |          |
|-----------|----------|----------|
| -716.6767 | 16.9274  | 24.6453  |
| 34.0805   | 50.2349  | 58.5236  |
| 64.1916   | 70.9358  | 80.3942  |
| 83.7264   | 93.2507  | 108.0104 |
| 130.1960  | 136.0871 | 146.1286 |
| 151.5048  | 203.3193 | 215.2569 |
| 227.7159  | 242.9105 | 248.9084 |
| 255.1888  | 270.6088 | 283.3744 |
| 287.0502  | 326.7211 | 338.2627 |
| 359.1701  | 386.4811 | 392.9999 |
| 401.3765  | 416.8410 | 438.0526 |
| 443.7450  | 464.2091 | 485.4476 |
| 488.1853  | 495.9905 | 521.7136 |
| 526.3921  | 551.5554 | 574.3067 |
| 582.7336  | 594.6844 | 616.4601 |
| 626.1550  | 644.5881 | 679.4133 |
| 693.6652  | 707.3531 | 715.7357 |
| 758.2018  | 766.6018 | 781.3773 |

|           |           |           |
|-----------|-----------|-----------|
| 786.1618  | 824.7646  | 840.0840  |
| 851.0379  | 876.5908  | 880.6543  |
| 886.7224  | 899.7571  | 920.1468  |
| 948.7439  | 954.9143  | 970.9909  |
| 976.7211  | 991.7157  | 993.5161  |
| 1002.1781 | 1003.7954 | 1029.1195 |
| 1037.1698 | 1055.2163 | 1067.8392 |
| 1069.4532 | 1083.2193 | 1094.8491 |
| 1103.2129 | 1107.0750 | 1124.3716 |
| 1135.5500 | 1149.6948 | 1155.5765 |
| 1156.8159 | 1162.1992 | 1181.1993 |
| 1191.0897 | 1211.9597 | 1225.6892 |
| 1233.0016 | 1243.2028 | 1266.3725 |
| 1279.8558 | 1285.8508 | 1296.5111 |
| 1317.0095 | 1340.0028 | 1357.4583 |
| 1368.9425 | 1374.8362 | 1385.7302 |
| 1392.7920 | 1409.2174 | 1424.5727 |
| 1442.5042 | 1446.4004 | 1450.5601 |
| 1459.0307 | 1466.8060 | 1469.0928 |
| 1472.1062 | 1476.4375 | 1481.3490 |
| 1488.8365 | 1519.4016 | 1529.8003 |
| 1556.7922 | 1617.0632 | 1638.6067 |
| 1653.1911 | 1669.6178 | 1678.6357 |
| 1712.2718 | 1799.2196 | 2997.8392 |
| 3003.3980 | 3010.4165 | 3087.2671 |
| 3108.3464 | 3113.1302 | 3127.3441 |
| 3127.3893 | 3131.6114 | 3158.1232 |
| 3160.7900 | 3163.3327 | 3166.3377 |
| 3170.1844 | 3179.6013 | 3183.4736 |
| 3189.0268 | 3191.2163 | 3194.9839 |
| 3199.1941 | 3208.1904 | 3219.3257 |

## 16

Zero-point correction= 0.407433

Thermal correction to Energy= 0.434188

Thermal correction to Enthalpy= 0.435132

Thermal correction to Gibbs Free Energy= 0.348822

Sum of electronic and zero-point Energies= -1342.657220

Sum of electronic and thermal Energies= -1342.630465

Sum of electronic and thermal Enthalpies= -1342.629521

Sum of electronic and thermal Free Energies= -1342.715831

Cartesian coordinates

|   |           |           |           |
|---|-----------|-----------|-----------|
| C | -4.137982 | -3.168691 | -1.013960 |
| C | -2.836620 | -2.739016 | -1.182967 |

|   |           |           |           |
|---|-----------|-----------|-----------|
| C | -2.343846 | -1.610440 | -0.504869 |
| C | -3.186065 | -0.936823 | 0.413294  |
| C | -4.512096 | -1.369505 | 0.560129  |
| C | -4.978525 | -2.465133 | -0.145260 |
| H | -4.506760 | -4.034797 | -1.556412 |
| H | -2.164026 | -3.248646 | -1.868631 |
| H | -5.144865 | -0.830631 | 1.258997  |
| H | -6.008960 | -2.787072 | -0.010333 |
| C | -0.986925 | -1.161616 | -0.873569 |
| O | -0.209423 | -1.873272 | -1.497615 |
| C | -0.564801 | 0.265407  | -0.528007 |
| C | 0.318844  | 0.800808  | -1.579358 |
| H | -1.450367 | 0.892001  | -0.416473 |
| H | 0.903574  | 0.093550  | -2.170811 |
| O | -2.698653 | 0.036410  | 1.179680  |
| H | -0.374118 | -0.289967 | 1.534287  |
| N | 0.480443  | 2.053157  | -1.832365 |
| C | 1.432626  | 2.505748  | -2.850500 |
| H | 0.887794  | 3.041221  | -3.631902 |
| H | 2.148097  | 3.186649  | -2.381467 |
| H | 1.956934  | 1.650578  | -3.276549 |
| C | -0.213980 | 3.138520  | -1.126532 |
| H | 0.483957  | 3.598605  | -0.419489 |
| H | -0.508318 | 3.885744  | -1.866564 |
| H | -1.100828 | 2.777744  | -0.603105 |
| B | -3.239791 | 1.414464  | 1.179142  |
| F | -4.511728 | 1.465940  | 1.723319  |
| F | -2.338686 | 2.176873  | 1.905502  |
| F | -3.272482 | 1.873360  | -0.153614 |
| C | 1.604801  | -0.275678 | 0.687221  |
| C | 0.227108  | 0.287380  | 0.821520  |
| C | 2.773183  | 0.376447  | 0.827190  |
| H | 1.638621  | -1.330160 | 0.407575  |
| H | 0.217238  | 1.317821  | 1.192196  |
| C | 2.875899  | 1.844766  | 1.127377  |
| H | 3.606581  | 2.031364  | 1.922925  |
| H | 1.924187  | 2.279855  | 1.441884  |
| C | 4.054771  | -0.352656 | 0.668042  |
| C | 4.165741  | -1.713661 | 0.986063  |
| C | 5.201449  | 0.305456  | 0.204053  |
| C | 5.364057  | -2.394652 | 0.818826  |
| H | 3.306001  | -2.238625 | 1.396952  |
| C | 6.401579  | -0.375462 | 0.034015  |
| H | 5.156964  | 1.363914  | -0.042516 |

|   |          |           |           |
|---|----------|-----------|-----------|
| C | 6.488742 | -1.729765 | 0.337691  |
| H | 5.423415 | -3.448729 | 1.079741  |
| H | 7.273682 | 0.158017  | -0.336923 |
| H | 3.221425 | 2.409480  | 0.250184  |
| H | 7.428532 | -2.261605 | 0.211507  |

Vibrational frequencies

|           |           |           |
|-----------|-----------|-----------|
| 18.8713   | 25.5862   | 31.5079   |
| 43.2767   | 54.6654   | 60.5207   |
| 70.2815   | 87.8634   | 90.6363   |
| 92.6256   | 114.1903  | 124.1002  |
| 135.5442  | 142.1757  | 172.4621  |
| 180.6546  | 182.4468  | 195.7155  |
| 208.5654  | 229.3563  | 240.1613  |
| 271.7023  | 295.3124  | 307.8334  |
| 327.8148  | 336.0827  | 358.7164  |
| 376.8666  | 395.2332  | 399.5610  |
| 411.9525  | 421.5619  | 442.7634  |
| 446.1180  | 471.5628  | 481.6934  |
| 498.8238  | 512.2715  | 526.2819  |
| 558.2783  | 568.0687  | 579.2160  |
| 593.9223  | 611.2644  | 626.3960  |
| 635.1087  | 655.4599  | 704.6838  |
| 712.5453  | 744.6399  | 747.0670  |
| 768.7609  | 779.6036  | 786.5988  |
| 804.9624  | 851.1047  | 863.3679  |
| 872.9574  | 884.3667  | 886.1065  |
| 911.1969  | 919.1558  | 929.9200  |
| 970.8047  | 973.2468  | 973.7101  |
| 986.3743  | 994.0492  | 996.3947  |
| 996.7133  | 1005.7165 | 1035.9239 |
| 1041.0317 | 1046.5224 | 1056.4137 |
| 1067.0411 | 1082.3814 | 1099.6736 |
| 1106.2069 | 1109.0039 | 1110.2264 |
| 1120.1985 | 1131.5666 | 1153.6602 |
| 1158.1397 | 1158.8056 | 1160.6000 |
| 1177.3836 | 1191.5436 | 1205.1622 |
| 1219.4934 | 1232.5365 | 1240.8821 |
| 1270.5826 | 1302.0554 | 1320.7254 |
| 1327.0229 | 1342.7423 | 1357.3852 |
| 1369.4948 | 1380.6545 | 1384.1089 |
| 1404.1109 | 1411.1388 | 1424.0588 |
| 1429.8575 | 1434.7103 | 1443.7473 |
| 1452.5342 | 1461.3663 | 1467.8515 |
| 1473.5586 | 1477.4875 | 1480.0830 |

|           |           |           |
|-----------|-----------|-----------|
| 1490.2423 | 1524.4050 | 1530.9553 |
| 1625.2886 | 1643.1469 | 1668.2536 |
| 1672.6648 | 1729.8531 | 1750.9745 |
| 1768.1014 | 3028.0606 | 3058.3580 |
| 3060.5787 | 3066.1676 | 3097.9160 |
| 3123.1689 | 3149.0524 | 3151.3392 |
| 3152.7388 | 3156.8424 | 3160.7957 |
| 3161.9440 | 3170.4869 | 3174.4043 |
| 3176.0755 | 3183.7850 | 3188.0981 |
| 3188.9465 | 3189.6358 | 3192.8465 |
| 3196.8345 | 3200.7537 | 3214.7430 |

## 17

Zero-point correction= 0.420830

Thermal correction to Energy= 0.452331

Thermal correction to Enthalpy= 0.453276

Thermal correction to Gibbs Free Energy= 0.356444

Sum of electronic and zero-point Energies= -1667.090346

Sum of electronic and thermal Energies= -1667.058845

Sum of electronic and thermal Enthalpies= -1667.057901

Sum of electronic and thermal Free Energies= -1667.154733

Cartesian coordinates

|   |           |           |           |
|---|-----------|-----------|-----------|
| C | -2.866338 | 3.638169  | -0.615854 |
| C | -2.059917 | 2.946856  | 0.269326  |
| C | -1.636845 | 1.637606  | -0.018260 |
| C | -1.989942 | 1.077776  | -1.258489 |
| C | -2.791006 | 1.770909  | -2.151547 |
| C | -3.240889 | 3.042174  | -1.819819 |
| H | -3.207844 | 4.638805  | -0.370430 |
| H | -1.765182 | 3.390883  | 1.215875  |
| H | -3.033259 | 1.304389  | -3.102379 |
| H | -3.874620 | 3.580788  | -2.518779 |
| C | -0.942530 | 0.878685  | 1.018298  |
| O | -0.103865 | 1.396232  | 1.801466  |
| C | -1.226888 | -0.537784 | 1.165404  |
| C | -0.573698 | -1.344710 | 2.238553  |
| H | -2.174246 | -0.869865 | 0.752438  |
| H | 0.078143  | -0.758495 | 2.889182  |
| O | -1.545884 | -0.153867 | -1.673773 |
| H | -0.745709 | -0.434089 | -1.199407 |
| N | -1.290406 | -2.351071 | 2.959324  |
| C | -0.348716 | -3.281662 | 3.562948  |
| H | -0.883645 | -3.960046 | 4.235634  |
| H | 0.186287  | -3.890111 | 2.809425  |

|   |           |           |           |
|---|-----------|-----------|-----------|
| H | 0.395913  | -2.733078 | 4.149776  |
| C | -2.326658 | -3.058918 | 2.231669  |
| H | -1.945835 | -3.652061 | 1.377866  |
| H | -2.815061 | -3.757783 | 2.918193  |
| H | -3.096228 | -2.372124 | 1.866231  |
| B | -2.892366 | -1.724472 | -1.844919 |
| F | -3.244547 | -1.498653 | -3.095128 |
| F | -1.979934 | -2.652810 | -1.574165 |
| F | -3.705710 | -1.341086 | -0.867697 |
| C | 1.283100  | -1.003118 | 0.454429  |
| C | -0.024087 | -1.535428 | 0.856955  |
| C | 2.022485  | -1.429455 | -0.591044 |
| H | 1.689209  | -0.214310 | 1.090252  |
| H | -0.402107 | -2.401634 | 0.313398  |
| C | 1.613029  | -2.558201 | -1.493711 |
| H | 1.892649  | -2.344555 | -2.530961 |
| H | 0.538121  | -2.757211 | -1.473565 |
| C | 3.334067  | -0.800945 | -0.863573 |
| C | 3.549540  | 0.563135  | -0.620715 |
| C | 4.391225  | -1.557093 | -1.386473 |
| C | 4.788748  | 1.139960  | -0.866887 |
| H | 2.728279  | 1.186450  | -0.271657 |
| C | 5.632154  | -0.979093 | -1.626870 |
| H | 4.249799  | -2.616207 | -1.591506 |
| C | 5.837280  | 0.371801  | -1.365588 |
| H | 4.931815  | 2.201501  | -0.679201 |
| H | 6.442071  | -1.588323 | -2.021201 |
| H | 2.117675  | -3.492411 | -1.214360 |
| H | 6.805641  | 0.826529  | -1.559657 |
| B | 0.876757  | 2.635030  | 1.583719  |
| F | 0.289699  | 3.707649  | 2.189632  |
| F | 2.014076  | 2.206647  | 2.202633  |
| F | 1.032230  | 2.777672  | 0.230449  |

Vibrational frequencies

|          |          |          |
|----------|----------|----------|
| 20.9859  | 26.1540  | 30.2714  |
| 39.7589  | 42.8379  | 56.7765  |
| 62.9182  | 65.7057  | 69.9063  |
| 78.2228  | 87.3680  | 91.0404  |
| 94.9951  | 104.5523 | 105.5994 |
| 129.7797 | 148.2662 | 159.2666 |
| 171.5002 | 187.4944 | 192.6635 |
| 201.9432 | 212.2163 | 232.6638 |
| 256.5180 | 264.2617 | 272.1673 |
| 282.9357 | 300.0711 | 308.7951 |



|           |           |           |
|-----------|-----------|-----------|
| 323.0018  | 355.7520  | 368.9320  |
| 373.7132  | 400.1684  | 414.4080  |
| 415.0408  | 424.2247  | 429.8740  |
| 454.1598  | 477.2577  | 482.8431  |
| 484.3755  | 490.4188  | 506.6197  |
| 512.9420  | 518.6266  | 527.7613  |
| 557.9976  | 564.6596  | 570.6556  |
| 581.5498  | 595.8184  | 607.9817  |
| 624.3067  | 632.1820  | 671.3934  |
| 692.7007  | 708.1600  | 728.3650  |
| 769.1783  | 772.1794  | 774.5603  |
| 811.7078  | 834.2457  | 854.6443  |
| 858.2277  | 865.3495  | 876.1734  |
| 883.0788  | 887.0772  | 916.1249  |
| 925.4993  | 944.4197  | 950.7734  |
| 976.8363  | 979.4596  | 988.6546  |
| 1000.7798 | 1005.1501 | 1005.8261 |
| 1039.2764 | 1055.5790 | 1060.3651 |
| 1062.7435 | 1070.8441 | 1081.6970 |
| 1093.8231 | 1103.4403 | 1110.0617 |
| 1113.9437 | 1120.8121 | 1135.5332 |
| 1159.2166 | 1163.3627 | 1165.1740 |
| 1183.3825 | 1196.6269 | 1218.5780 |
| 1222.5554 | 1231.7588 | 1238.3784 |
| 1256.4763 | 1266.9830 | 1278.7026 |
| 1287.1283 | 1323.6790 | 1328.1689 |
| 1330.3494 | 1342.7920 | 1365.2255 |
| 1382.7368 | 1389.0023 | 1401.1845 |
| 1409.7312 | 1415.1308 | 1419.8043 |
| 1445.9190 | 1446.7015 | 1455.0303 |
| 1459.9867 | 1468.4517 | 1470.6803 |
| 1474.3394 | 1479.3045 | 1485.0958 |
| 1495.7900 | 1504.8481 | 1521.2271 |
| 1531.3217 | 1628.6536 | 1642.7269 |
| 1648.6154 | 1670.1434 | 1683.9147 |
| 1709.0111 | 2949.3860 | 2954.4821 |
| 3033.8873 | 3077.3025 | 3085.6564 |
| 3108.4812 | 3129.7956 | 3134.0607 |
| 3135.0647 | 3143.7112 | 3159.7824 |
| 3169.6365 | 3169.9377 | 3176.3544 |
| 3183.8493 | 3188.6232 | 3193.7852 |
| 3195.6811 | 3204.2111 | 3209.3975 |
| 3217.3914 | 3225.5206 | 3757.7474 |

**18-ts**

Zero-point correction= 0.415980

Thermal correction to Energy= 0.446774

Thermal correction to Enthalpy= 0.447718

Thermal correction to Gibbs Free Energy= 0.352995

Sum of electronic and zero-point Energies= -1667.065776

Sum of electronic and thermal Energies= -1667.034982

Sum of electronic and thermal Enthalpies= -1667.034038

Sum of electronic and thermal Free Energies= -1667.128760

## Cartesian coordinates

|   |           |           |           |
|---|-----------|-----------|-----------|
| C | -2.547332 | 3.662595  | -0.837095 |
| C | -1.876525 | 2.941117  | 0.129270  |
| C | -1.630848 | 1.562292  | -0.031021 |
| C | -2.061867 | 0.947800  | -1.228248 |
| C | -2.700045 | 1.681988  | -2.215566 |
| C | -2.959140 | 3.029759  | -2.009896 |
| H | -2.749491 | 4.717684  | -0.682949 |
| H | -1.555407 | 3.423302  | 1.047666  |
| H | -2.991617 | 1.175736  | -3.129593 |
| H | -3.482106 | 3.593222  | -2.777533 |
| C | -0.998403 | 0.856067  | 1.070792  |
| O | -0.232325 | 1.399793  | 1.898242  |
| C | -1.210767 | -0.607425 | 1.231097  |
| C | -0.529784 | -1.335950 | 2.265864  |
| H | -2.233617 | -0.908553 | 0.996165  |
| H | 0.403126  | -0.932341 | 2.652816  |
| O | -1.807684 | -0.375447 | -1.496876 |
| H | -1.019255 | -0.804188 | -0.855184 |
| N | -0.994291 | -2.448893 | 2.844110  |
| C | -0.027832 | -3.376336 | 3.415956  |
| H | -0.484151 | -3.913814 | 4.251103  |
| H | 0.303443  | -4.102793 | 2.660311  |
| H | 0.842603  | -2.826426 | 3.781041  |
| C | -2.253446 | -3.040888 | 2.421926  |
| H | -2.163790 | -3.514800 | 1.431602  |
| H | -2.538461 | -3.807627 | 3.145308  |
| H | -3.048428 | -2.292050 | 2.389329  |
| B | -3.012355 | -1.454327 | -1.629225 |
| F | -3.654164 | -1.162944 | -2.785428 |
| F | -2.321515 | -2.629685 | -1.627820 |
| F | -3.778232 | -1.266932 | -0.508597 |
| C | 1.153657  | -0.849246 | 0.078814  |
| C | -0.200740 | -1.335480 | 0.313600  |
| C | 1.998900  | -1.333204 | -0.856834 |

|   |           |           |           |
|---|-----------|-----------|-----------|
| H | 1.502759  | -0.027822 | 0.708240  |
| H | -0.474247 | -2.362394 | 0.067786  |
| C | 1.601173  | -2.472834 | -1.752188 |
| H | 2.059070  | -2.376940 | -2.742818 |
| H | 0.515147  | -2.516941 | -1.895099 |
| C | 3.355174  | -0.772262 | -1.005266 |
| C | 3.647231  | 0.560456  | -0.670364 |
| C | 4.400708  | -1.564730 | -1.500557 |
| C | 4.933692  | 1.064446  | -0.802388 |
| H | 2.849825  | 1.220484  | -0.332165 |
| C | 5.688831  | -1.058292 | -1.632951 |
| H | 4.208289  | -2.601142 | -1.770935 |
| C | 5.964348  | 0.258743  | -1.281790 |
| H | 5.130409  | 2.102305  | -0.542507 |
| H | 6.481525  | -1.699621 | -2.012106 |
| H | 1.911874  | -3.447315 | -1.348978 |
| H | 6.969809  | 0.658394  | -1.389349 |
| B | 0.839831  | 2.616944  | 1.742932  |
| F | 0.261059  | 3.697519  | 2.331746  |
| F | 1.905512  | 2.109772  | 2.414099  |
| F | 1.056620  | 2.748532  | 0.402743  |

Vibrational frequencies

|           |          |          |
|-----------|----------|----------|
| -802.9243 | 16.6464  | 34.8111  |
| 35.9714   | 43.6854  | 49.5158  |
| 58.0608   | 62.1862  | 70.9024  |
| 74.9373   | 78.0907  | 81.5995  |
| 94.2208   | 103.1549 | 112.2436 |
| 136.2403  | 147.9892 | 165.9374 |
| 172.0002  | 175.0321 | 182.8308 |
| 215.2902  | 222.6341 | 238.4444 |
| 243.0328  | 261.2718 | 268.6965 |
| 281.3164  | 295.5239 | 305.4810 |
| 314.9377  | 348.6494 | 353.1249 |
| 378.0844  | 396.0581 | 401.0189 |
| 409.8529  | 417.0162 | 424.0712 |
| 445.5433  | 464.3500 | 476.9136 |
| 483.2940  | 486.8568 | 500.5695 |
| 509.5593  | 521.0369 | 534.3649 |
| 554.3758  | 558.3663 | 580.5683 |
| 589.1678  | 606.3751 | 619.9348 |
| 625.7825  | 644.0903 | 655.0332 |
| 668.8161  | 710.2035 | 722.5232 |
| 764.9728  | 767.8237 | 782.2373 |
| 796.6660  | 815.0530 | 832.9678 |

|           |           |           |
|-----------|-----------|-----------|
| 854.5099  | 858.5658  | 882.5930  |
| 884.9536  | 892.7547  | 906.0632  |
| 931.7305  | 938.6071  | 959.3716  |
| 978.5252  | 992.2880  | 993.2213  |
| 999.6016  | 1004.4290 | 1012.1354 |
| 1035.8903 | 1053.5320 | 1058.5370 |
| 1070.3186 | 1077.7149 | 1083.6818 |
| 1091.5103 | 1101.6179 | 1110.0509 |
| 1112.2646 | 1136.2147 | 1144.5952 |
| 1151.0116 | 1157.2756 | 1170.3208 |
| 1172.3566 | 1193.8986 | 1228.0229 |
| 1237.8431 | 1238.6548 | 1256.2810 |
| 1259.9129 | 1274.7945 | 1281.3102 |
| 1285.0122 | 1291.1214 | 1315.8721 |
| 1321.2619 | 1335.3723 | 1361.4836 |
| 1377.4645 | 1379.1267 | 1388.5379 |
| 1398.3853 | 1410.7111 | 1425.4408 |
| 1444.7723 | 1447.7286 | 1452.1422 |
| 1460.4988 | 1464.6208 | 1468.4487 |
| 1476.3607 | 1477.7888 | 1482.2106 |
| 1496.3866 | 1518.4255 | 1531.4370 |
| 1569.0268 | 1632.8892 | 1638.5571 |
| 1647.2524 | 1653.2123 | 1670.7611 |
| 1689.0120 | 1712.6685 | 3008.3439 |
| 3015.1600 | 3017.3572 | 3091.7778 |
| 3115.7776 | 3118.5416 | 3122.6471 |
| 3136.7570 | 3142.1664 | 3162.0399 |
| 3162.3245 | 3163.8925 | 3166.6722 |
| 3171.2529 | 3180.0316 | 3184.1944 |
| 3194.3395 | 3194.6697 | 3195.3299 |
| 3208.8159 | 3218.5909 | 3224.4498 |

### 19-ts

Zero-point correction= 0.404548

Thermal correction to Energy= 0.431461

Thermal correction to Enthalpy= 0.432405

Thermal correction to Gibbs Free Energy= 0.346903

Sum of electronic and zero-point Energies= -1342.591372

Sum of electronic and thermal Energies= -1342.564458

Sum of electronic and thermal Enthalpies= -1342.563514

Sum of electronic and thermal Free Energies= -1342.649017

Cartesian coordinates

|   |          |           |           |
|---|----------|-----------|-----------|
| C | 4.100546 | -2.595426 | -0.245334 |
| C | 3.116919 | -1.830755 | 0.354293  |

|   |           |           |           |
|---|-----------|-----------|-----------|
| C | 2.631904  | -0.642555 | -0.229697 |
| C | 3.205490  | -0.248116 | -1.463192 |
| C | 4.185314  | -1.030426 | -2.068995 |
| C | 4.634216  | -2.197257 | -1.468767 |
| H | 4.454030  | -3.499356 | 0.242222  |
| H | 2.719375  | -2.133910 | 1.316804  |
| H | 4.597680  | -0.707178 | -3.023740 |
| H | 5.404558  | -2.789338 | -1.955680 |
| C | 1.660391  | 0.134651  | 0.524182  |
| O | 1.046134  | -0.332273 | 1.558315  |
| C | 1.331289  | 1.534026  | 0.214710  |
| C | 0.591252  | 2.334003  | 1.181855  |
| H | 2.118312  | 2.063016  | -0.318362 |
| H | -0.049455 | 1.812697  | 1.890390  |
| O | 2.777995  | 0.890503  | -2.056063 |
| H | 3.223019  | 0.999160  | -2.906593 |
| N | 0.554539  | 3.645772  | 1.200139  |
| C | -0.468019 | 4.355083  | 1.961380  |
| H | 0.002692  | 5.140325  | 2.559032  |
| H | -1.192789 | 4.811463  | 1.278191  |
| H | -0.986736 | 3.659254  | 2.622371  |
| C | 1.344589  | 4.447889  | 0.274870  |
| H | 0.953929  | 4.336463  | -0.745178 |
| H | 1.277824  | 5.495948  | 0.569233  |
| H | 2.393589  | 4.143140  | 0.296522  |
| B | 0.344452  | -1.669540 | 1.817789  |
| F | 1.116850  | -2.390738 | 2.706182  |
| F | -0.860677 | -1.308091 | 2.394098  |
| F | 0.162800  | -2.324105 | 0.624431  |
| C | -1.020089 | 0.567355  | -0.452278 |
| C | 0.195478  | 1.229557  | -0.749335 |
| C | -2.071233 | 0.395083  | -1.314509 |
| H | -1.139417 | 0.173890  | 0.557058  |
| H | 0.375700  | 1.612504  | -1.749592 |
| C | -2.052859 | 0.962949  | -2.705244 |
| H | -2.543070 | 0.287782  | -3.416918 |
| H | -1.035042 | 1.127533  | -3.070276 |
| C | -3.290857 | -0.298860 | -0.886905 |
| C | -3.305916 | -1.213271 | 0.185337  |
| C | -4.510613 | -0.075554 | -1.552804 |
| C | -4.478642 | -1.841942 | 0.577271  |
| H | -2.382138 | -1.455288 | 0.705587  |
| C | -5.683146 | -0.709122 | -1.158440 |
| H | -4.548231 | 0.623364  | -2.385646 |

|   |           |           |           |
|---|-----------|-----------|-----------|
| C | -5.679268 | -1.596410 | -0.087564 |
| H | -4.451676 | -2.546931 | 1.406059  |
| H | -6.608210 | -0.503370 | -1.693631 |
| H | -2.577829 | 1.927903  | -2.773602 |
| H | -6.594411 | -2.096619 | 0.220414  |

Vibrational frequencies

|           |           |           |
|-----------|-----------|-----------|
| -153.9678 | 25.2262   | 36.5614   |
| 41.4686   | 49.9660   | 59.7169   |
| 62.8503   | 74.5334   | 80.9825   |
| 88.1832   | 100.3365  | 106.7371  |
| 118.7810  | 136.0436  | 153.9594  |
| 162.8923  | 165.9826  | 180.0908  |
| 213.2600  | 219.5972  | 238.6605  |
| 253.3577  | 265.7669  | 277.3080  |
| 278.3076  | 321.0925  | 356.9886  |
| 362.1739  | 378.5560  | 392.2865  |
| 401.0361  | 411.4007  | 418.4418  |
| 432.6706  | 444.9751  | 456.9079  |
| 476.3426  | 484.6498  | 512.8804  |
| 517.4741  | 534.5137  | 543.2370  |
| 552.3785  | 571.8621  | 600.5732  |
| 611.4774  | 624.1109  | 626.1738  |
| 652.4840  | 705.3730  | 706.1569  |
| 714.0588  | 721.9732  | 762.3901  |
| 766.7388  | 777.5598  | 824.0411  |
| 848.3313  | 851.2079  | 856.2581  |
| 879.8324  | 896.0498  | 906.5347  |
| 923.9836  | 957.5670  | 957.6589  |
| 968.7170  | 986.9362  | 988.0362  |
| 993.2838  | 998.7479  | 1000.4331 |
| 1037.3119 | 1056.4477 | 1062.7087 |
| 1067.4775 | 1083.4941 | 1094.1028 |
| 1096.8162 | 1110.5866 | 1114.5643 |
| 1133.8594 | 1140.2755 | 1150.0967 |
| 1155.5831 | 1164.8664 | 1174.8914 |
| 1196.2853 | 1200.3808 | 1210.9069 |
| 1212.5841 | 1227.6876 | 1256.2139 |
| 1284.5274 | 1287.3901 | 1305.1455 |
| 1323.2836 | 1336.6345 | 1346.9992 |
| 1364.4701 | 1379.9523 | 1392.9227 |
| 1394.1666 | 1413.3930 | 1421.0457 |
| 1425.7474 | 1442.3152 | 1443.5456 |
| 1454.5903 | 1455.9709 | 1465.5731 |
| 1470.2852 | 1477.4017 | 1481.1471 |

|           |           |           |
|-----------|-----------|-----------|
| 1490.3448 | 1519.8780 | 1531.2552 |
| 1546.0273 | 1612.3529 | 1633.6493 |
| 1645.2318 | 1665.6995 | 1669.1502 |
| 1671.0461 | 3006.8607 | 3031.7413 |
| 3041.4602 | 3081.8836 | 3130.0978 |
| 3131.3763 | 3134.9646 | 3162.3066 |
| 3166.5366 | 3168.1906 | 3169.9775 |
| 3173.7315 | 3175.1809 | 3182.0412 |
| 3182.2083 | 3188.5075 | 3189.8484 |
| 3194.5421 | 3202.0912 | 3206.6790 |
| 3208.8107 | 3228.1276 | 3853.4321 |

## H<sub>2</sub>O

Zero-point correction= 0.021691

Thermal correction to Energy= 0.024527

Thermal correction to Enthalpy= 0.025471

Thermal correction to Gibbs Free Energy= 0.004044

Sum of electronic and zero-point Energies= -76.370584

Sum of electronic and thermal Energies= -76.367749

Sum of electronic and thermal Enthalpies= -76.366804

Sum of electronic and thermal Free Energies= -76.388232

Cartesian coordinates

|   |           |           |           |
|---|-----------|-----------|-----------|
| O | -0.000000 | 0.000000  | 0.119176  |
| H | 0.000000  | 0.754965  | -0.476705 |
| H | -0.000000 | -0.754965 | -0.476705 |

Vibrational frequencies

|           |           |           |
|-----------|-----------|-----------|
| 1641.7381 | 3881.4128 | 3998.2886 |
|-----------|-----------|-----------|

## NH<sub>4</sub>Cl

Zero-point correction= 0.049596

Thermal correction to Energy= 0.053715

Thermal correction to Enthalpy= 0.054659

Thermal correction to Gibbs Free Energy= 0.024198

Sum of electronic and zero-point Energies= -517.278101

Sum of electronic and thermal Energies= -517.273982

Sum of electronic and thermal Enthalpies= -517.273038

Sum of electronic and thermal Free Energies= -517.303499

Cartesian coordinates

|    |           |           |           |
|----|-----------|-----------|-----------|
| N  | -1.827304 | 0.000019  | -0.000013 |
| H  | -2.173638 | -0.954944 | 0.080718  |
| H  | -0.747507 | -0.000149 | -0.000743 |
| H  | -2.175074 | 0.407697  | -0.866789 |
| H  | -2.173740 | 0.547023  | 0.786929  |
| Cl | 1.180064  | 0.000014  | -0.000001 |

Vibrational frequencies

|           |           |           |
|-----------|-----------|-----------|
| 269.8056  | 308.6765  | 321.8529  |
| 1372.0626 | 1464.1167 | 1467.6623 |
| 1675.3825 | 1676.6302 | 2542.4080 |
| 3471.6736 | 3599.1404 | 3600.6554 |

**NH<sub>2</sub>Me<sub>2</sub>Cl**

Zero-point correction= 0.107068

Thermal correction to Energy= 0.113502

Thermal correction to Enthalpy= 0.114446

Thermal correction to Gibbs Free Energy= 0.076350

Sum of electronic and zero-point Energies= -595.771387

Sum of electronic and thermal Energies= -595.764953

Sum of electronic and thermal Enthalpies= -595.764009

Sum of electronic and thermal Free Energies= -595.802105

Cartesian coordinates

|    |           |           |           |
|----|-----------|-----------|-----------|
| N  | -0.968441 | -0.000014 | -0.489562 |
| H  | 0.099487  | -0.000504 | -0.507565 |
| H  | -1.308779 | 0.000154  | -1.452259 |
| Cl | 1.972434  | -0.000294 | 0.036834  |
| C  | -1.388056 | 1.237338  | 0.207231  |
| H  | -2.474599 | 1.255030  | 0.307001  |
| H  | -0.916978 | 1.240843  | 1.192437  |
| H  | -1.044558 | 2.100748  | -0.363015 |
| C  | -1.389498 | -1.236783 | 0.207330  |
| H  | -0.916701 | -1.241715 | 1.191709  |
| H  | -2.475914 | -1.252090 | 0.308976  |
| H  | -1.048923 | -2.100691 | -0.363909 |

Vibrational frequencies

|           |           |           |
|-----------|-----------|-----------|
| 73.9323   | 119.1240  | 172.7023  |
| 220.1680  | 319.5830  | 411.2184  |
| 856.1644  | 906.8412  | 1024.2270 |
| 1036.5980 | 1098.0966 | 1238.7545 |
| 1256.8822 | 1393.8077 | 1411.3967 |
| 1434.9854 | 1443.5967 | 1455.9446 |
| 1464.8327 | 1479.2418 | 1481.9418 |
| 1583.6548 | 2722.4204 | 3068.7207 |
| 3072.5669 | 3181.0399 | 3181.7330 |
| 3189.9862 | 3190.2018 | 3506.8420 |

**BF<sub>3</sub>NH<sub>3</sub>**

Zero-point correction= 0.052617

Thermal correction to Energy= 0.058168

Thermal correction to Enthalpy= 0.059112



Thermal correction to Gibbs Free Energy= 0.023848  
 Sum of electronic and zero-point Energies= -380.976533  
 Sum of electronic and thermal Energies= -380.970982  
 Sum of electronic and thermal Enthalpies= -380.970037  
 Sum of electronic and thermal Free Energies= -381.005302

Cartesian coordinates

|   |           |           |           |
|---|-----------|-----------|-----------|
| N | 1.466618  | -0.001316 | -0.000529 |
| H | 1.838966  | -0.330315 | -0.889724 |
| H | 1.838931  | -0.606986 | 0.728975  |
| H | 1.839575  | 0.933049  | 0.159273  |
| B | -0.186746 | -0.000037 | -0.000024 |
| F | -0.549495 | 0.825312  | -1.031605 |
| F | -0.551659 | -1.305508 | -0.198169 |
| F | -0.548853 | 0.481713  | 1.230363  |

Vibrational frequencies

|           |           |           |
|-----------|-----------|-----------|
| 115.3996  | 277.9199  | 279.2391  |
| 457.1994  | 457.8670  | 473.9145  |
| 691.9817  | 808.0666  | 810.8510  |
| 920.0213  | 1260.8868 | 1261.3772 |
| 1350.4687 | 1620.3419 | 1623.3852 |
| 3477.4654 | 3604.2434 | 3605.3459 |

### 3aa

Zero-point correction= 0.322778  
 Thermal correction to Energy= 0.342817  
 Thermal correction to Enthalpy= 0.343761  
 Thermal correction to Gibbs Free Energy= 0.271809  
 Sum of electronic and zero-point Energies= -959.558344  
 Sum of electronic and thermal Energies= -959.538305  
 Sum of electronic and thermal Enthalpies= -959.537361  
 Sum of electronic and thermal Free Energies= -959.609313

Cartesian coordinates

|   |          |           |           |
|---|----------|-----------|-----------|
| C | 3.544181 | -2.639009 | 0.661549  |
| C | 2.675804 | -1.646639 | 1.075383  |
| C | 2.632975 | -0.385251 | 0.460385  |
| C | 3.521579 | -0.141560 | -0.605872 |
| C | 4.408058 | -1.139126 | -1.018333 |
| C | 4.416748 | -2.375737 | -0.394078 |
| H | 3.546730 | -3.608239 | 1.151389  |
| H | 1.986688 | -1.815689 | 1.898585  |
| H | 5.094070 | -0.931085 | -1.837965 |
| H | 5.111320 | -3.139138 | -0.735566 |
| C | 1.646422 | 0.578101  | 1.017708  |
| O | 1.092973 | 0.342285  | 2.084457  |

|   |           |           |           |
|---|-----------|-----------|-----------|
| C | 1.224475  | 1.812316  | 0.248127  |
| C | 0.519049  | 2.767386  | 1.180159  |
| H | 2.119878  | 2.341535  | -0.111243 |
| H | 0.992047  | 2.872779  | 2.180586  |
| O | 3.518741  | 1.065351  | -1.215526 |
| H | 1.033541  | 0.967885  | -1.715498 |
| C | -0.762749 | 0.520716  | -0.655553 |
| C | 0.369443  | 1.442038  | -0.980156 |
| C | -2.081461 | 0.762215  | -0.747607 |
| H | -0.458748 | -0.464383 | -0.291583 |
| H | 0.017621  | 2.378238  | -1.424012 |
| C | -2.660488 | 2.083286  | -1.164055 |
| H | -3.496006 | 1.941898  | -1.859845 |
| H | -1.922368 | 2.731881  | -1.639725 |
| C | -3.054754 | -0.301248 | -0.398913 |
| C | -2.766904 | -1.656977 | -0.609999 |
| C | -4.305471 | 0.022903  | 0.143467  |
| C | -3.677062 | -2.647738 | -0.265308 |
| H | -1.824052 | -1.935650 | -1.076460 |
| C | -5.217140 | -0.967525 | 0.491427  |
| H | -4.565922 | 1.065400  | 0.312944  |
| C | -4.907234 | -2.308595 | 0.291361  |
| H | -3.429275 | -3.691344 | -0.446010 |
| H | -6.176141 | -0.687503 | 0.921512  |
| H | -3.050336 | 2.633445  | -0.297885 |
| H | -5.622160 | -3.083543 | 0.557017  |
| O | -0.448097 | 3.425767  | 0.875297  |
| H | 4.181355  | 1.078955  | -1.918213 |

Vibrational frequencies

|          |          |          |
|----------|----------|----------|
| 15.4211  | 22.8179  | 35.3985  |
| 55.0559  | 59.4305  | 75.1186  |
| 93.5753  | 129.6323 | 132.6966 |
| 149.0027 | 185.4673 | 205.8020 |
| 242.0114 | 253.0446 | 261.5321 |
| 304.2775 | 312.1735 | 333.3161 |
| 364.7914 | 382.5767 | 386.6346 |
| 391.3804 | 412.7646 | 422.1477 |
| 453.8550 | 510.1529 | 537.7997 |
| 542.8040 | 559.9227 | 562.5861 |
| 587.0756 | 626.1360 | 639.3296 |
| 651.2630 | 706.0249 | 712.9597 |
| 739.0034 | 761.5693 | 762.7058 |
| 769.6355 | 797.5236 | 839.0661 |
| 850.8361 | 853.5544 | 857.6370 |

|           |           |           |
|-----------|-----------|-----------|
| 900.2465  | 911.7862  | 928.5634  |
| 964.8793  | 973.0126  | 973.2674  |
| 991.8147  | 994.7072  | 995.2285  |
| 1005.1765 | 1038.1134 | 1049.4917 |
| 1056.8013 | 1066.4118 | 1078.1245 |
| 1089.7501 | 1105.7436 | 1115.9661 |
| 1149.0124 | 1157.3546 | 1158.8193 |
| 1181.3198 | 1187.3924 | 1207.7627 |
| 1221.0883 | 1243.1527 | 1294.9013 |
| 1304.9632 | 1318.5073 | 1325.9778 |
| 1330.9667 | 1357.0140 | 1367.9564 |
| 1383.4494 | 1393.8135 | 1405.6448 |
| 1420.0212 | 1445.5806 | 1456.3570 |
| 1470.4493 | 1478.9949 | 1491.3603 |
| 1529.4119 | 1531.1769 | 1642.2910 |
| 1652.9751 | 1671.8279 | 1672.5594 |
| 1737.2349 | 1763.6818 | 1854.6840 |
| 2928.2958 | 3033.0849 | 3046.3250 |
| 3049.5447 | 3101.9677 | 3118.1501 |
| 3129.8363 | 3158.6039 | 3167.5090 |
| 3168.3578 | 3173.8482 | 3181.7457 |
| 3187.3821 | 3187.5604 | 3195.5200 |
| 3197.6691 | 3208.0508 | 3855.6053 |

## D

Zero-point correction= 0.391438

Thermal correction to Energy= 0.414313

Thermal correction to Enthalpy= 0.415257

Thermal correction to Gibbs Free Energy= 0.336694

Sum of electronic and zero-point Energies= -1018.149635

Sum of electronic and thermal Energies= -1018.126760

Sum of electronic and thermal Enthalpies= -1018.125816

Sum of electronic and thermal Free Energies= -1018.204378

Cartesian coordinates

|   |           |           |           |
|---|-----------|-----------|-----------|
| C | -1.322500 | -0.667343 | 0.001627  |
| C | -0.127284 | -1.461289 | 0.297811  |
| C | -2.376806 | -0.446791 | 0.809547  |
| H | -1.336951 | -0.232831 | -0.995771 |
| H | -0.124571 | -2.022823 | 1.232181  |
| C | -2.500804 | -1.031816 | 2.187140  |
| H | -2.880743 | -0.287390 | 2.897149  |
| H | -1.544998 | -1.398527 | 2.569973  |
| C | -3.500630 | 0.391719  | 0.335602  |
| C | -3.299769 | 1.420104  | -0.597958 |

|   |           |           |           |
|---|-----------|-----------|-----------|
| C | -4.800808 | 0.198244  | 0.820926  |
| C | -4.357376 | 2.197225  | -1.048800 |
| H | -2.291606 | 1.627269  | -0.953407 |
| C | -5.861252 | 0.976597  | 0.370004  |
| H | -4.992505 | -0.584105 | 1.552444  |
| C | -5.646755 | 1.978263  | -0.569899 |
| H | -4.171042 | 2.990769  | -1.769140 |
| H | -6.861887 | 0.796959  | 0.757236  |
| H | -3.203512 | -1.876149 | 2.208405  |
| H | -6.474249 | 2.591261  | -0.918996 |
| C | 3.276821  | 3.584019  | 0.026932  |
| C | 2.352640  | 2.638058  | -0.382170 |
| C | 2.576545  | 1.264033  | -0.228357 |
| C | 3.802870  | 0.851609  | 0.323534  |
| C | 4.741428  | 1.802412  | 0.728229  |
| C | 4.478022  | 3.156402  | 0.587982  |
| H | 3.067830  | 4.643549  | -0.089266 |
| H | 1.409650  | 2.937357  | -0.832402 |
| H | 5.688511  | 1.466816  | 1.148918  |
| H | 5.220653  | 3.880368  | 0.914312  |
| C | 1.486336  | 0.358972  | -0.698469 |
| O | 0.724164  | 0.742948  | -1.577700 |
| C | 1.300759  | -0.955835 | -0.038917 |
| C | 0.682026  | -2.072630 | -0.813963 |
| H | 2.030538  | -1.213301 | 0.719169  |
| H | 0.342917  | -1.763821 | -1.806389 |
| O | 4.077870  | -0.472971 | 0.421267  |
| H | 4.964517  | -0.589738 | 0.784483  |
| N | 1.188680  | -3.413912 | -0.798677 |
| C | 0.103155  | -4.358367 | -0.985119 |
| H | 0.507331  | -5.365359 | -1.139321 |
| H | -0.589059 | -4.390935 | -0.121118 |
| H | -0.480128 | -4.084353 | -1.871566 |
| C | 2.025657  | -3.775962 | 0.324015  |
| H | 1.507286  | -3.738124 | 1.303575  |
| H | 2.373476  | -4.805445 | 0.183539  |
| H | 2.907874  | -3.129616 | 0.370011  |

Vibrational frequencies

|          |          |          |
|----------|----------|----------|
| 15.1013  | 21.7567  | 28.1203  |
| 35.0316  | 56.5373  | 58.2911  |
| 72.9048  | 100.0689 | 116.6858 |
| 141.1774 | 151.9344 | 167.8188 |
| 194.1438 | 198.2956 | 221.0872 |
| 244.0412 | 250.9088 | 279.4911 |

|           |           |           |
|-----------|-----------|-----------|
| 294.2665  | 303.6603  | 326.3163  |
| 360.5777  | 370.6332  | 374.9906  |
| 376.5762  | 413.9208  | 417.5816  |
| 439.8432  | 463.4701  | 483.0963  |
| 486.5443  | 530.4490  | 544.9284  |
| 556.0530  | 560.6347  | 566.1699  |
| 603.9651  | 626.2334  | 653.6394  |
| 699.2783  | 707.8157  | 745.6070  |
| 762.2533  | 770.0505  | 771.7812  |
| 817.4485  | 840.3448  | 851.8166  |
| 855.1848  | 860.1022  | 866.5636  |
| 906.4587  | 928.7954  | 940.7745  |
| 952.5367  | 962.6538  | 973.9228  |
| 983.4568  | 986.0640  | 994.5843  |
| 1004.7228 | 1039.3126 | 1047.6079 |
| 1055.5636 | 1060.4477 | 1070.0251 |
| 1074.6814 | 1085.7938 | 1090.8154 |
| 1104.5765 | 1107.6379 | 1108.9709 |
| 1122.7984 | 1157.8864 | 1159.8434 |
| 1164.8885 | 1180.7489 | 1182.2880 |
| 1192.7533 | 1222.3285 | 1236.8678 |
| 1249.4106 | 1275.9994 | 1295.4980 |
| 1318.7565 | 1323.5744 | 1327.7602 |
| 1338.6125 | 1362.0175 | 1374.4290 |
| 1385.8410 | 1394.7411 | 1408.3058 |
| 1416.7961 | 1441.3144 | 1452.9461 |
| 1456.4445 | 1465.5023 | 1466.8159 |
| 1470.1635 | 1477.2486 | 1481.4261 |
| 1490.7145 | 1496.2727 | 1531.1002 |
| 1534.4598 | 1642.0303 | 1656.0539 |
| 1671.7354 | 1674.8636 | 1724.3524 |
| 1766.8703 | 2927.5412 | 2944.2868 |
| 3024.3011 | 3066.5133 | 3074.1510 |
| 3093.6743 | 3114.9867 | 3119.3368 |
| 3129.5927 | 3138.6590 | 3153.1887 |
| 3161.4675 | 3163.9484 | 3168.3513 |
| 3177.2346 | 3183.3683 | 3183.9980 |
| 3186.7342 | 3192.7517 | 3193.5048 |
| 3205.1199 | 3227.8741 | 3863.7086 |

### **D-Zn**

Zero-point correction= 0.395677

Thermal correction to Energy= 0.423961

Thermal correction to Enthalpy= 0.424906

Thermal correction to Gibbs Free Energy= 0.333011  
 Sum of electronic and zero-point Energies= -1109.999706  
 Sum of electronic and thermal Energies= -1109.971422  
 Sum of electronic and thermal Enthalpies= -1109.970478  
 Sum of electronic and thermal Free Energies= -1110.062372

Cartesian coordinates

|   |           |           |           |
|---|-----------|-----------|-----------|
| C | 3.283248  | -1.025378 | -0.121414 |
| C | 2.024966  | -1.587192 | -0.645196 |
| C | 4.412887  | -0.820439 | -0.822048 |
| H | 3.274785  | -0.764373 | 0.933925  |
| H | 2.116665  | -2.194602 | -1.543948 |
| C | 4.565339  | -1.174183 | -2.273588 |
| H | 5.073133  | -0.369740 | -2.819062 |
| H | 3.603850  | -1.351953 | -2.762527 |
| C | 5.589094  | -0.222933 | -0.150950 |
| C | 5.429026  | 0.707942  | 0.886256  |
| C | 6.893001  | -0.550267 | -0.544969 |
| C | 6.529828  | 1.262709  | 1.525490  |
| H | 4.424250  | 1.018643  | 1.168995  |
| C | 7.995831  | 0.004249  | 0.095832  |
| H | 7.050639  | -1.261347 | -1.353828 |
| C | 7.820153  | 0.910650  | 1.136480  |
| H | 6.379239  | 1.986681  | 2.323425  |
| H | 8.998538  | -0.274681 | -0.221095 |
| H | 5.173823  | -2.078934 | -2.407846 |
| H | 8.682169  | 1.348713  | 1.634258  |
| C | -0.327018 | 4.025338  | -1.329430 |
| C | 0.363349  | 2.972223  | -0.748483 |
| C | -0.135046 | 1.664492  | -0.771605 |
| C | -1.383842 | 1.472431  | -1.362902 |
| C | -2.105535 | 2.516094  | -1.926589 |
| C | -1.563911 | 3.795877  | -1.926135 |
| H | 0.093980  | 5.026690  | -1.312154 |
| H | 1.322568  | 3.131509  | -0.263020 |
| H | -3.091532 | 2.323726  | -2.348116 |
| H | -2.119731 | 4.613756  | -2.376581 |
| C | 0.717767  | 0.604481  | -0.134501 |
| O | 1.446852  | 0.921348  | 0.796877  |
| C | 0.717145  | -0.753803 | -0.693215 |
| C | 0.920737  | -1.944150 | 0.263890  |
| H | 0.097986  | -0.940424 | -1.566743 |
| H | 1.048979  | -1.602677 | 1.295228  |
| O | -1.969572 | 0.203099  | -1.297436 |
| H | -2.556450 | 0.068189  | -2.058888 |

|    |           |           |           |
|----|-----------|-----------|-----------|
| N  | 0.158704  | -3.143464 | 0.166248  |
| C  | 0.210900  | -3.864035 | -1.087107 |
| H  | -0.370632 | -4.786423 | -0.985386 |
| H  | -0.214501 | -3.299902 | -1.940767 |
| H  | 1.238901  | -4.147545 | -1.331024 |
| C  | -1.195734 | -2.968345 | 0.634287  |
| H  | -1.810283 | -2.381902 | -0.089033 |
| H  | -1.684614 | -3.940021 | 0.764238  |
| H  | -1.200325 | -2.442448 | 1.597012  |
| Zn | -3.167924 | -0.100018 | 0.491383  |
| Br | -5.244452 | -0.683332 | -0.602810 |
| Br | -1.955433 | 0.631152  | 2.423883  |

Vibrational frequencies

|           |           |           |
|-----------|-----------|-----------|
| 17.9260   | 20.5765   | 27.1906   |
| 47.7743   | 52.6783   | 56.8692   |
| 61.6373   | 63.6091   | 73.6500   |
| 78.9595   | 83.5438   | 92.6733   |
| 108.1003  | 120.0925  | 140.6621  |
| 157.4894  | 175.0668  | 186.9898  |
| 188.2962  | 203.8616  | 218.0522  |
| 235.7710  | 237.0570  | 263.2839  |
| 278.5409  | 298.0139  | 307.8425  |
| 312.4631  | 338.0441  | 364.4302  |
| 371.6056  | 383.1010  | 395.1006  |
| 417.3258  | 428.6521  | 442.4386  |
| 478.5498  | 487.7211  | 503.9157  |
| 522.7440  | 545.4653  | 559.8010  |
| 562.0968  | 564.4219  | 581.1077  |
| 614.9067  | 626.0504  | 654.9449  |
| 703.3790  | 709.2707  | 736.8018  |
| 767.6805  | 770.2081  | 772.8374  |
| 811.2180  | 828.2306  | 852.3565  |
| 856.4295  | 865.2531  | 878.9123  |
| 898.0268  | 906.4796  | 929.9612  |
| 951.1889  | 965.5277  | 975.2455  |
| 985.7488  | 996.6812  | 996.7120  |
| 1005.4230 | 1038.3948 | 1042.8794 |
| 1054.5732 | 1070.0634 | 1071.9967 |
| 1073.2699 | 1084.3819 | 1096.9501 |
| 1106.6374 | 1109.5536 | 1120.3478 |
| 1123.1716 | 1156.9462 | 1161.3274 |
| 1164.9436 | 1189.5834 | 1190.5641 |
| 1192.0676 | 1226.8049 | 1235.1054 |
| 1242.2388 | 1245.2293 | 1284.0534 |

|           |           |           |
|-----------|-----------|-----------|
| 1305.2539 | 1320.0710 | 1327.5011 |
| 1351.0460 | 1361.6061 | 1374.4321 |
| 1383.5877 | 1391.4995 | 1405.8551 |
| 1419.9629 | 1443.1714 | 1448.6599 |
| 1459.8040 | 1466.2909 | 1468.3450 |
| 1472.0837 | 1478.9538 | 1482.7681 |
| 1498.9483 | 1523.5675 | 1527.3545 |
| 1531.4593 | 1643.1368 | 1652.1740 |
| 1673.0359 | 1681.9681 | 1729.9697 |
| 1769.2885 | 2927.9344 | 2940.6494 |
| 3028.8835 | 3064.9668 | 3083.6033 |
| 3099.4705 | 3112.3898 | 3126.8664 |
| 3136.9305 | 3142.7558 | 3166.7465 |
| 3167.3081 | 3169.6190 | 3171.4936 |
| 3179.5412 | 3186.0530 | 3191.7456 |
| 3195.5116 | 3197.8089 | 3199.8363 |
| 3202.6611 | 3209.8744 | 3792.0307 |



## NMR spectra for intermediate 1a-I.

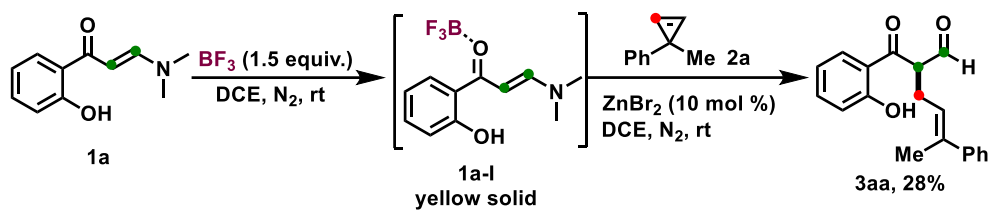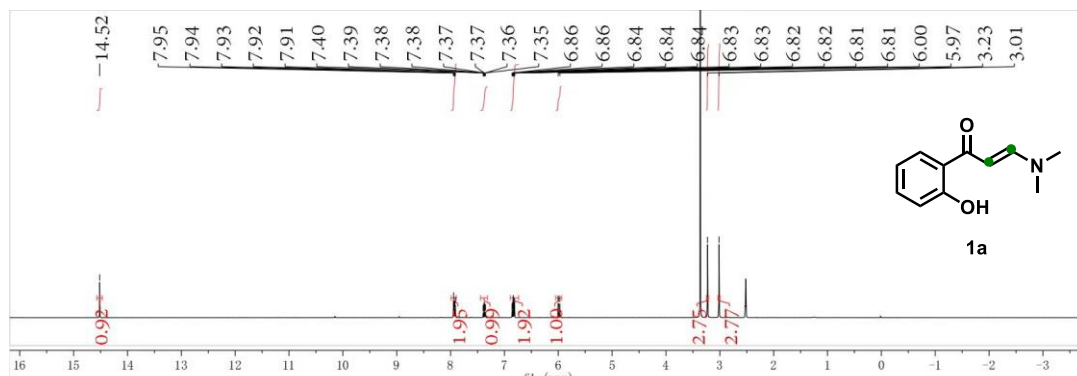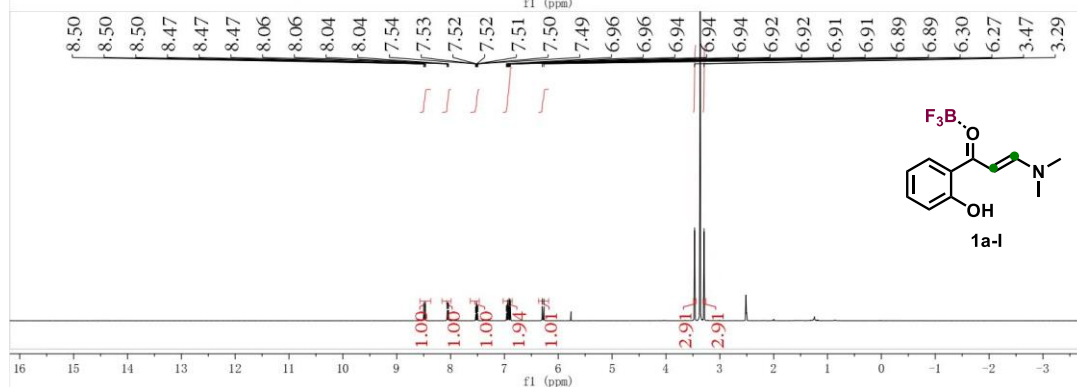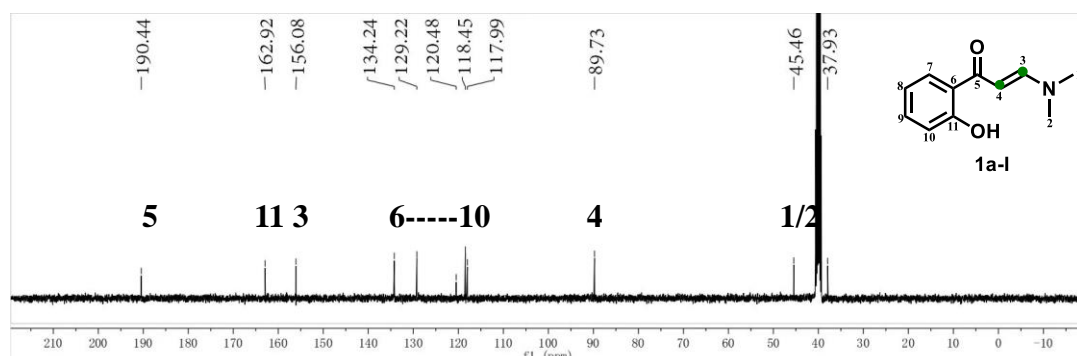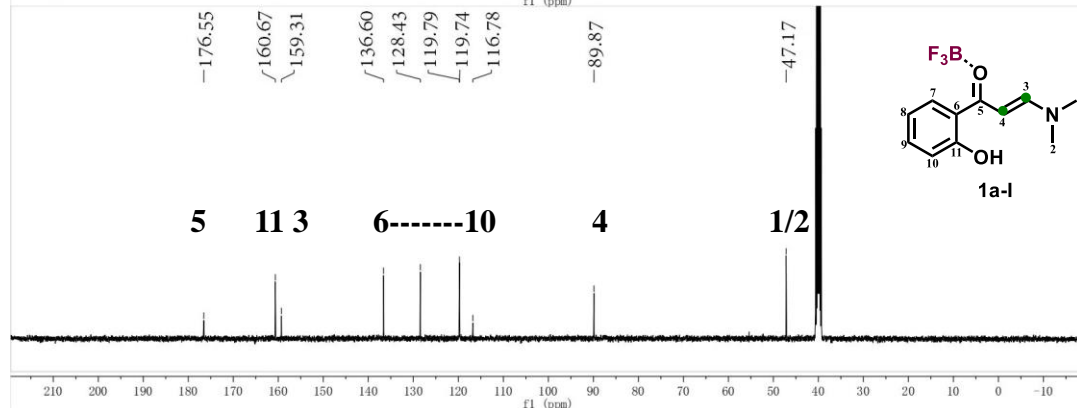

NOESY NMR spectra of product:

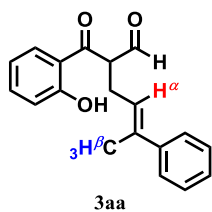

No NOE was observed between H<sup>α</sup> and H<sup>β</sup>

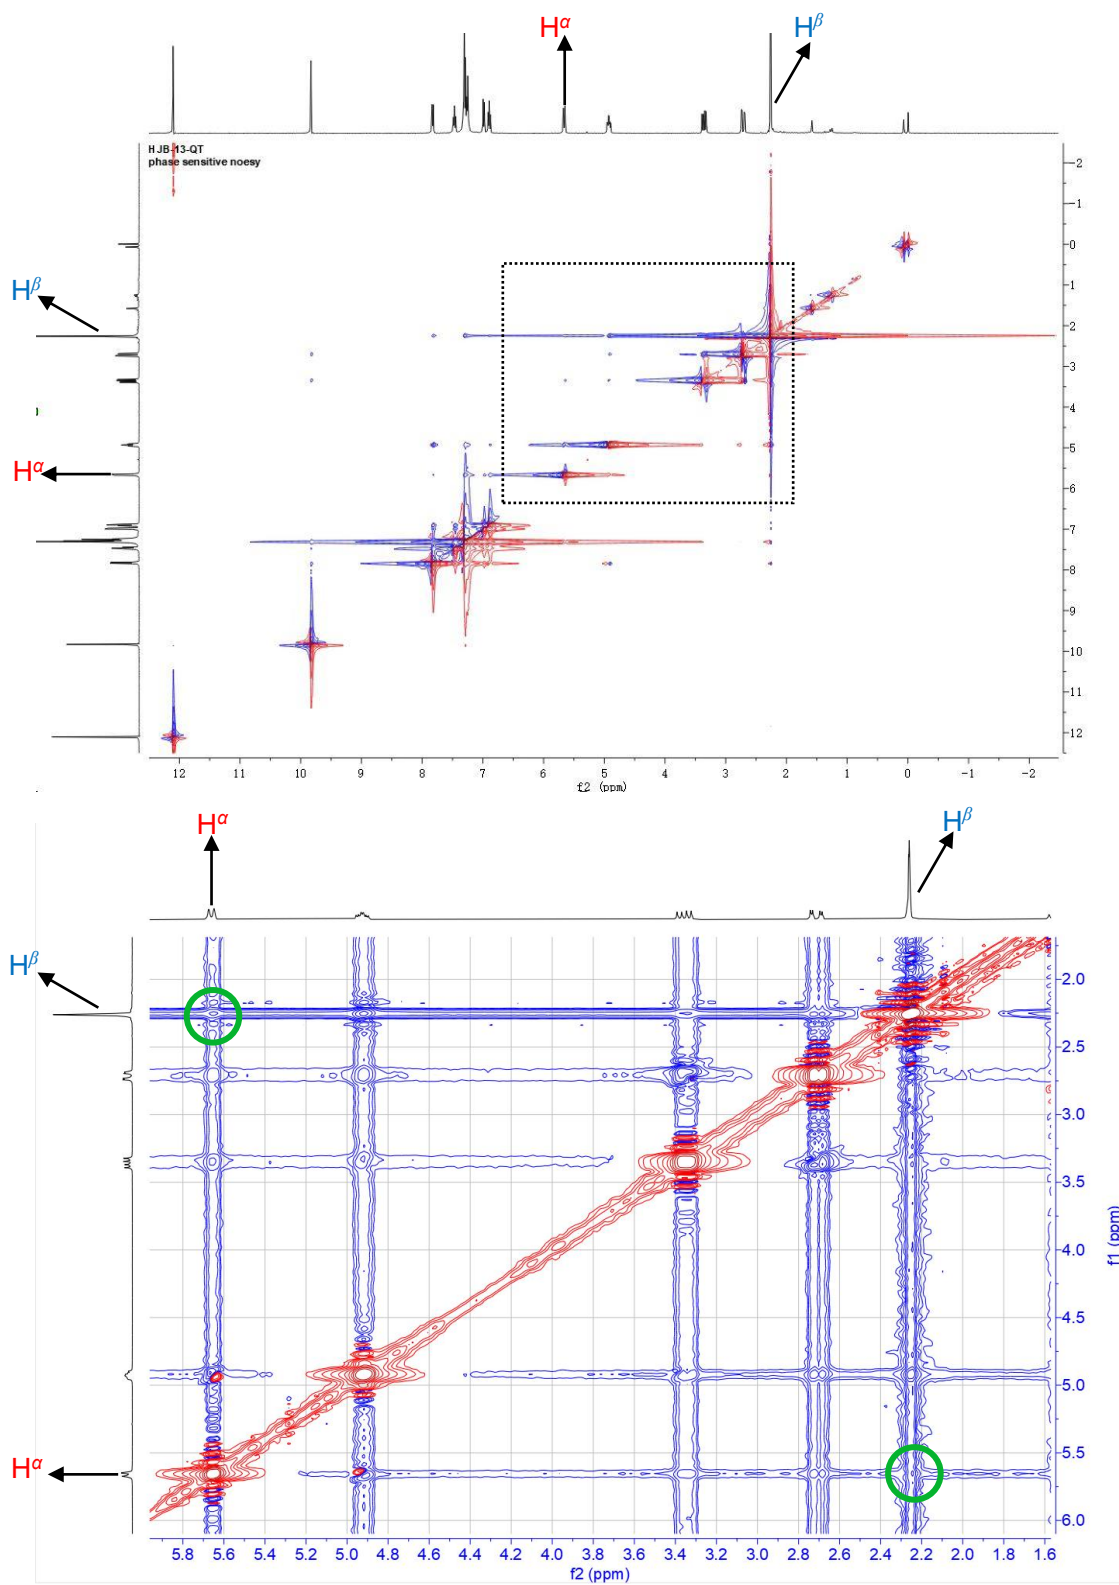

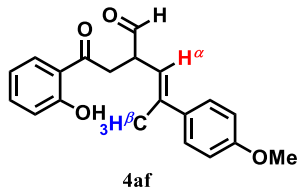

No NOE was observed between  $H^\alpha$  and  $H^\beta$

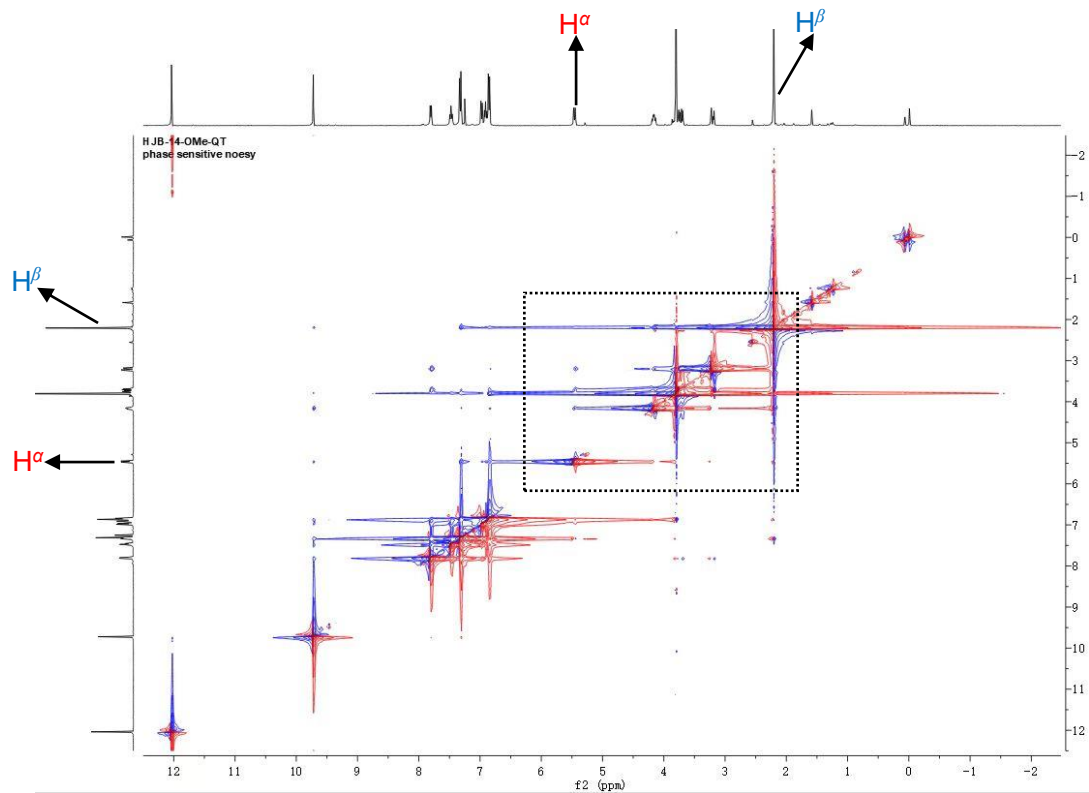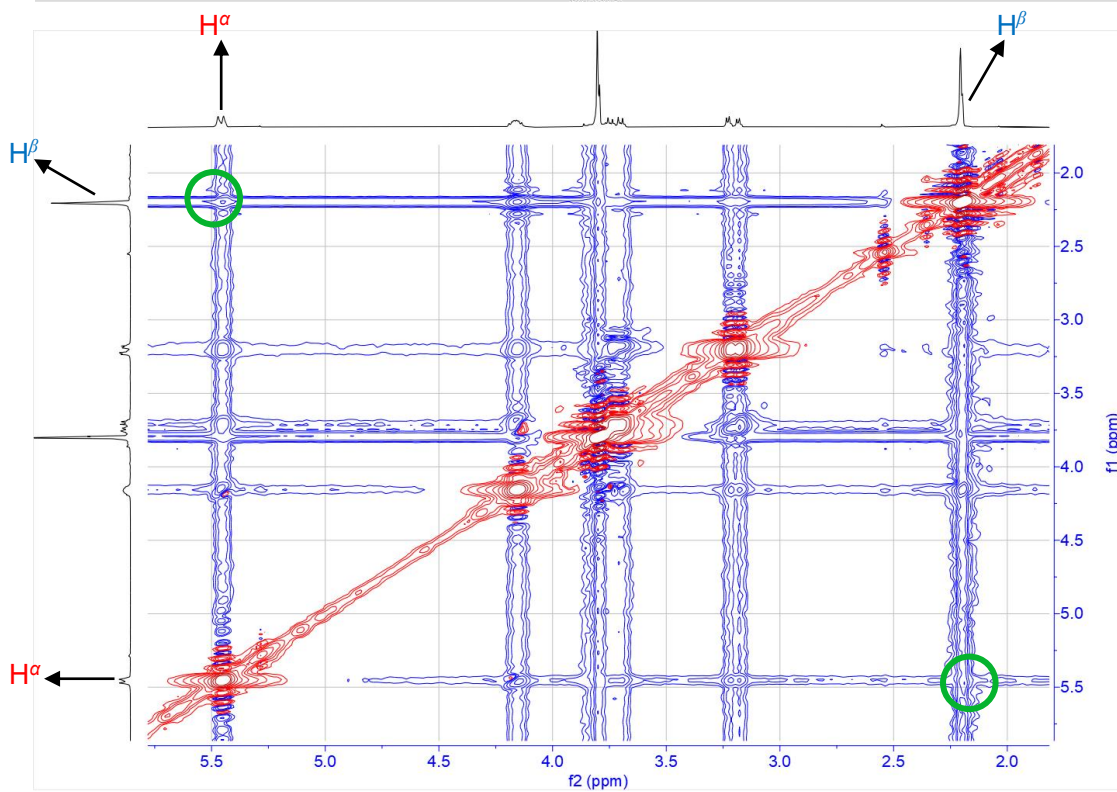

### NMR spectra for enamides:

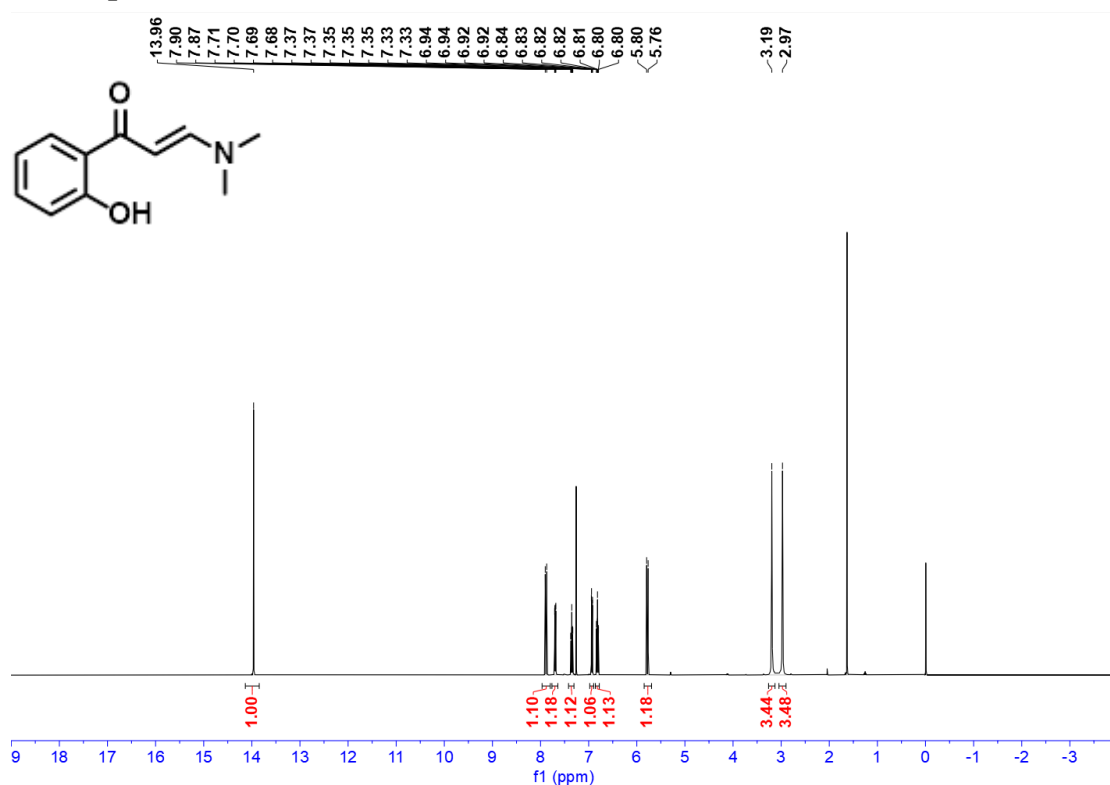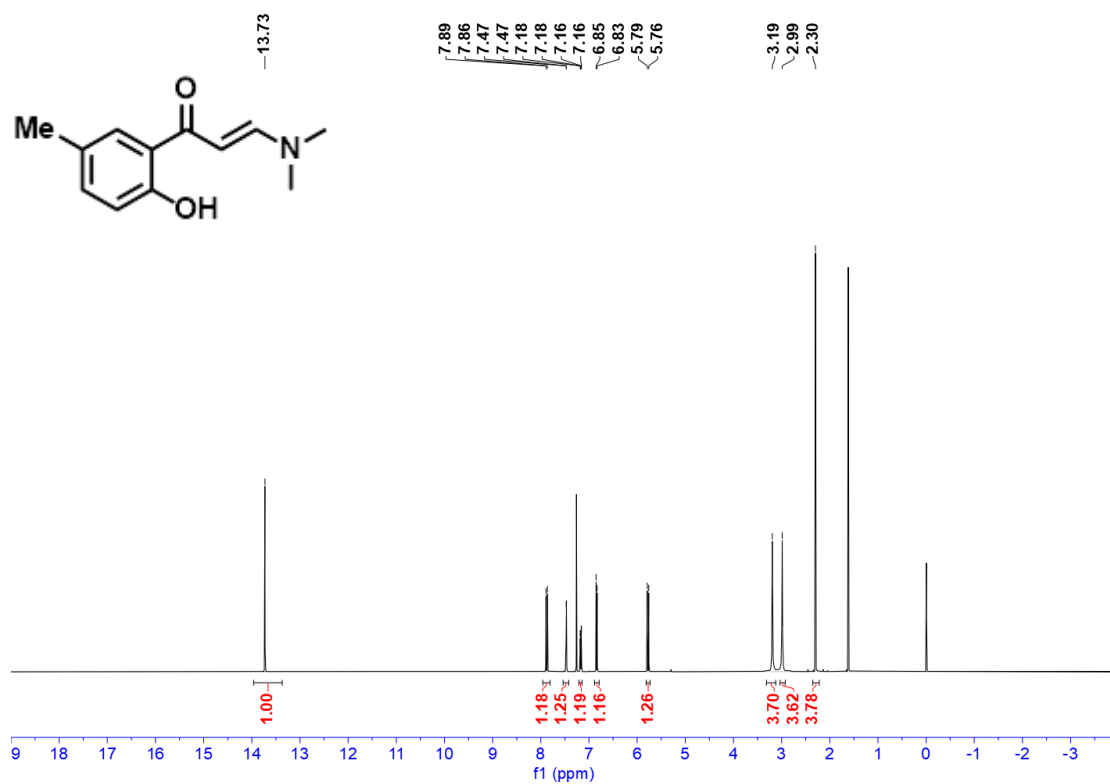

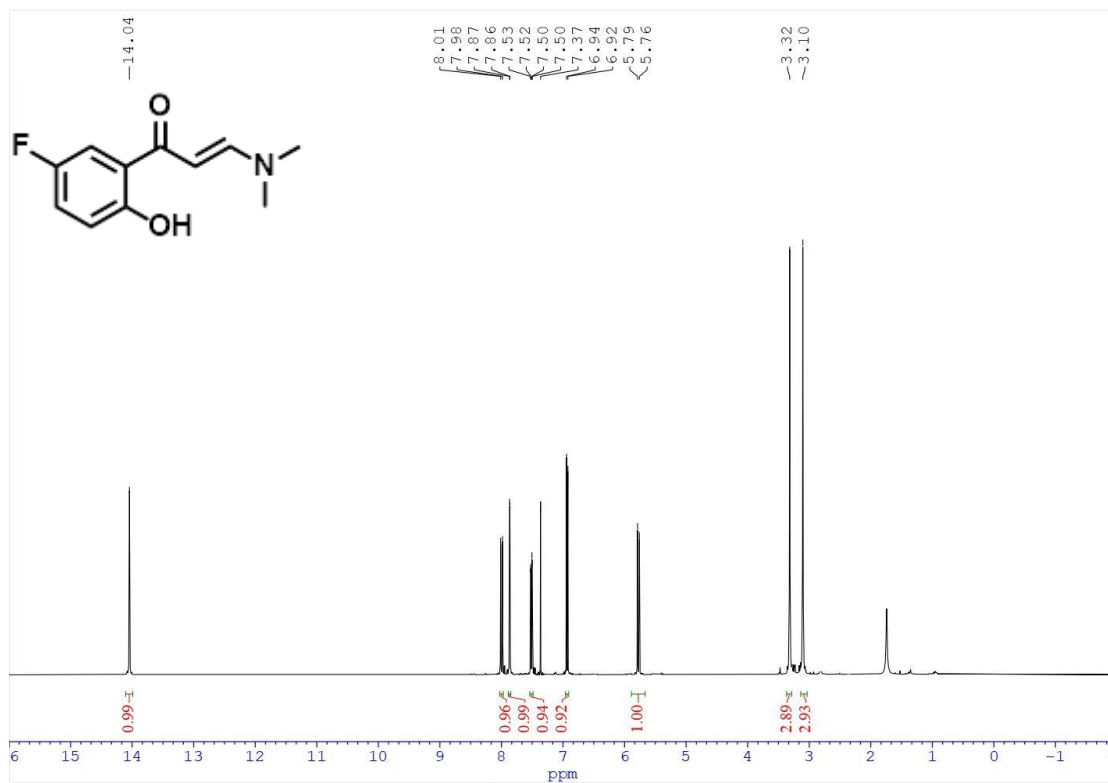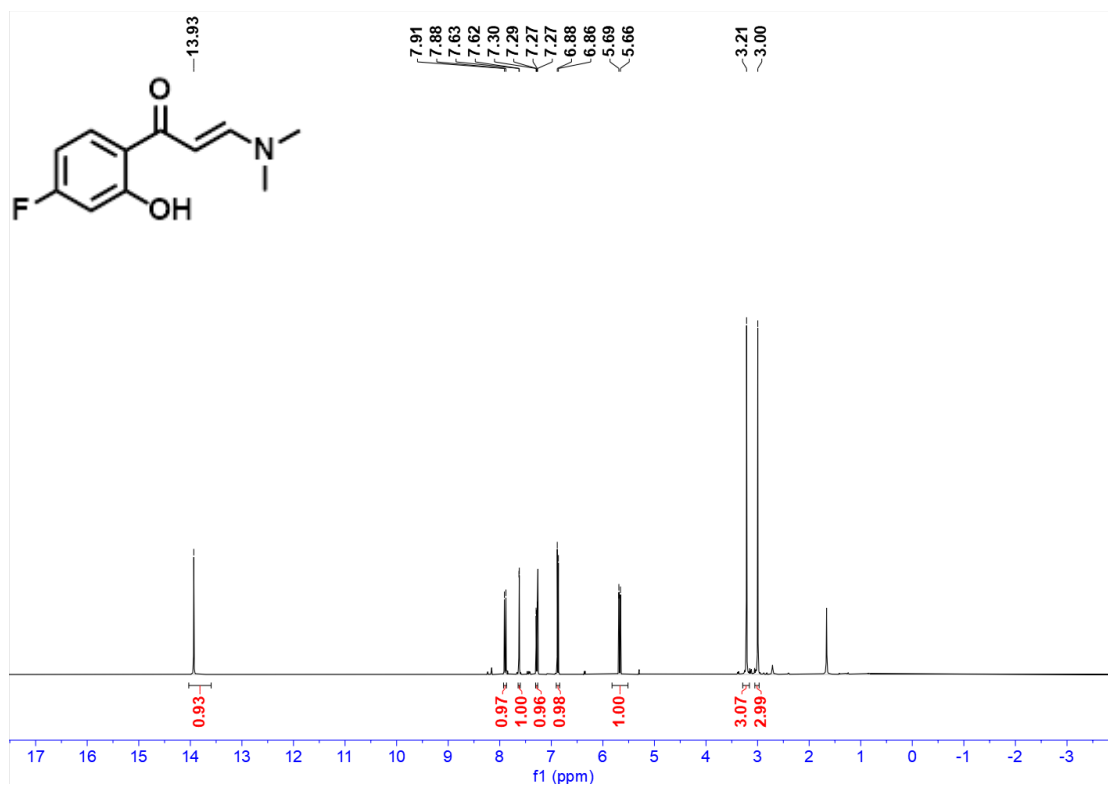

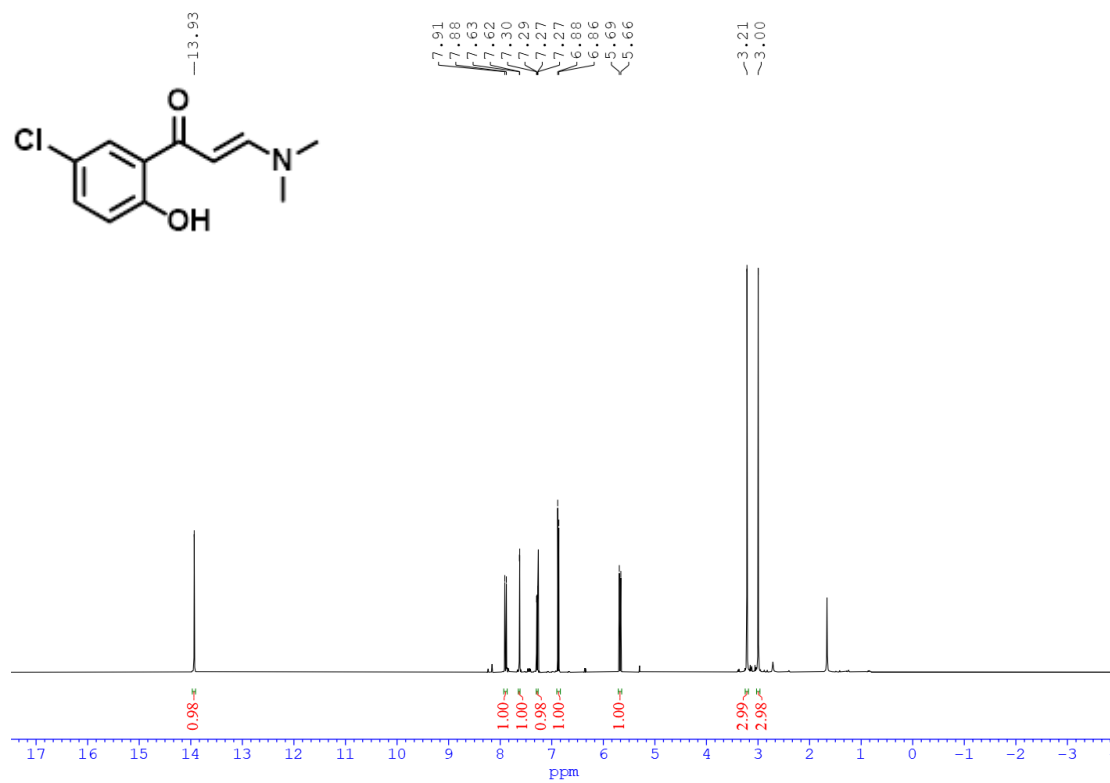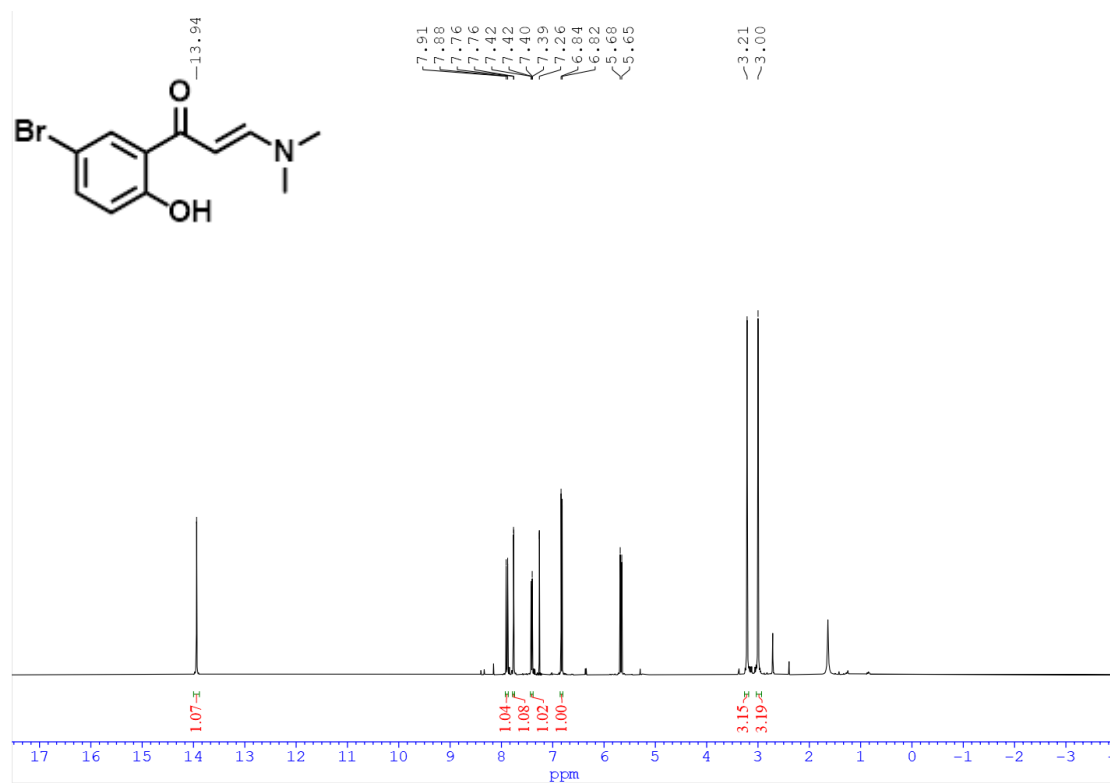

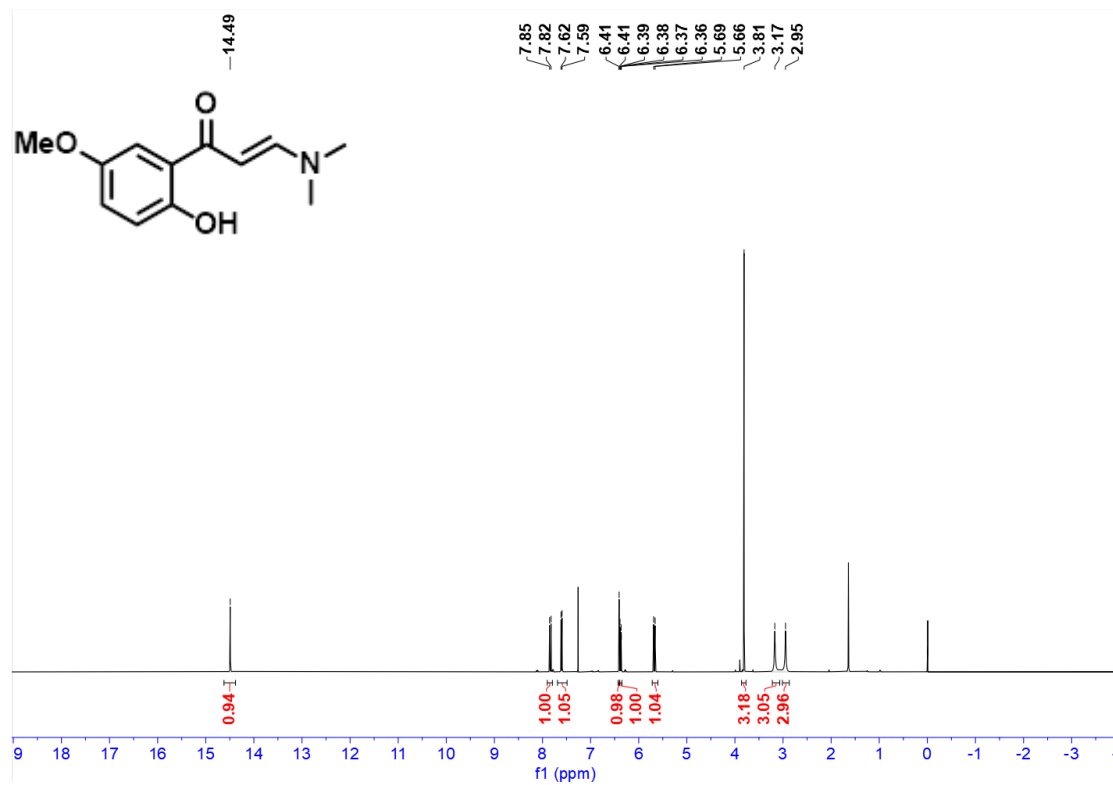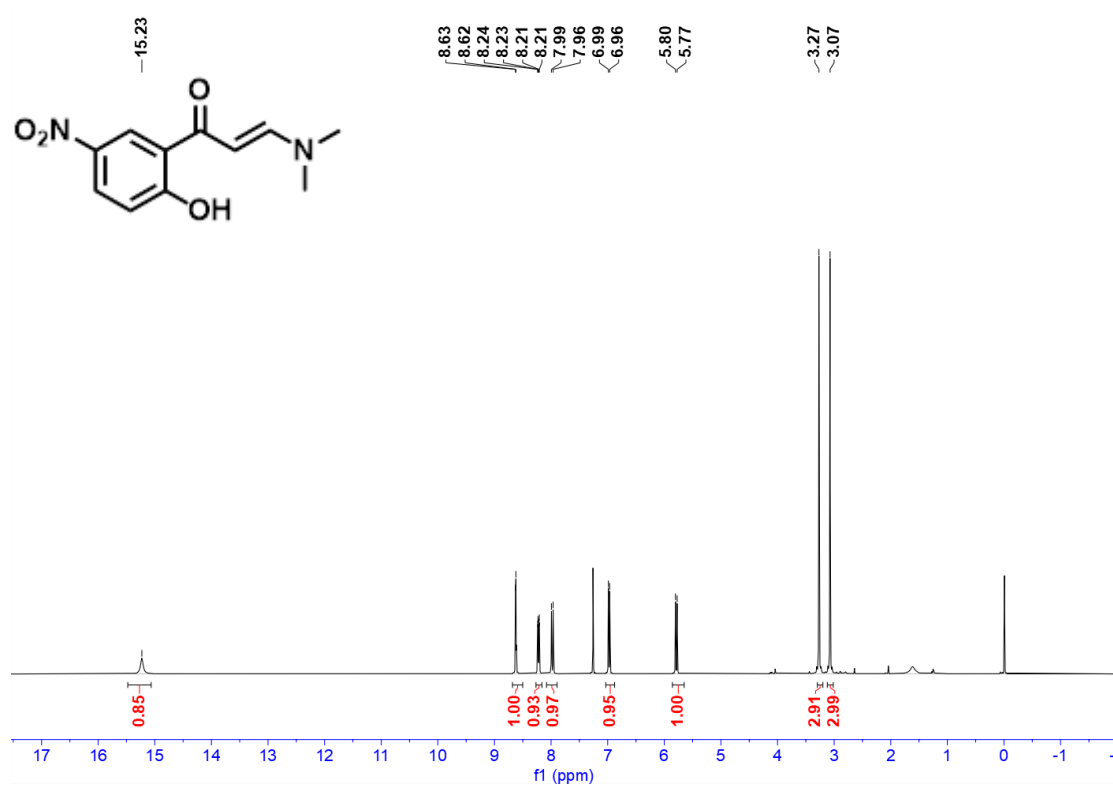

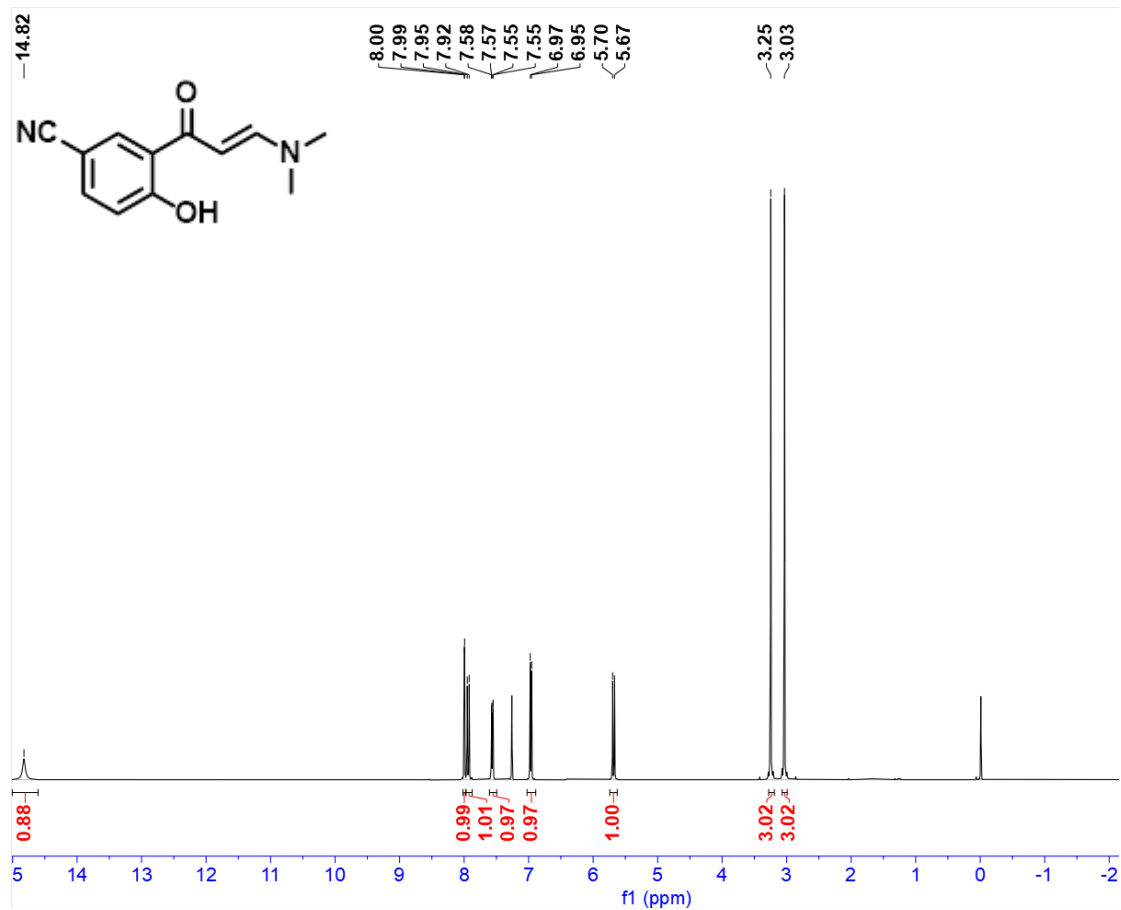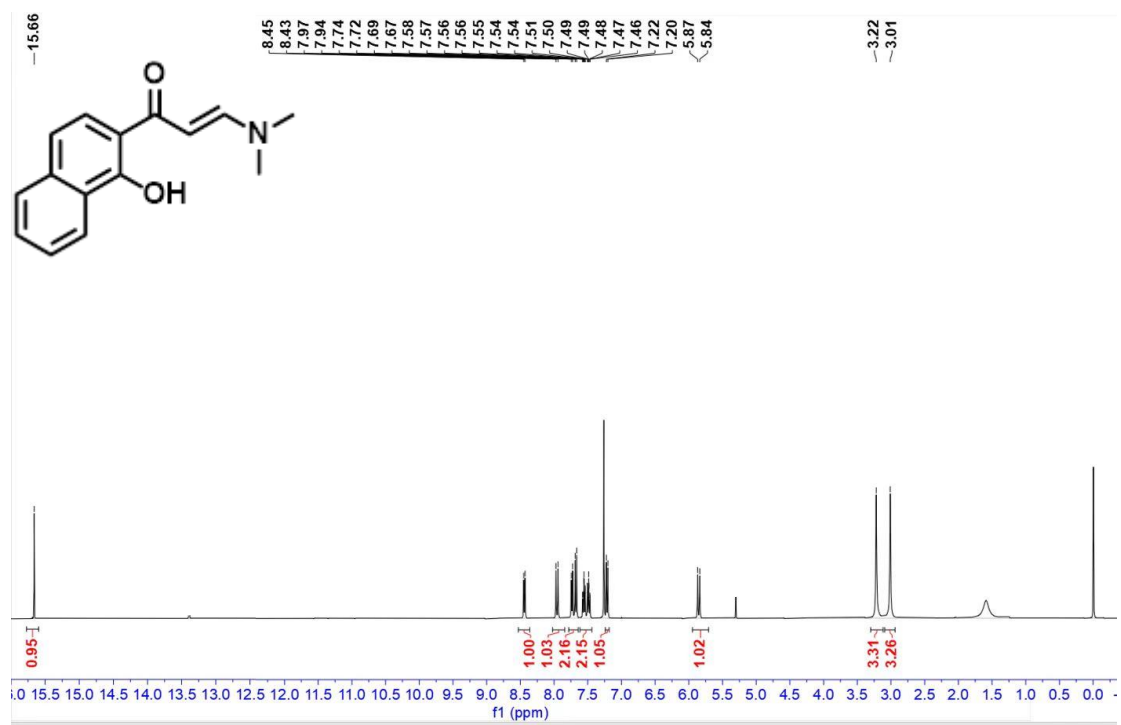



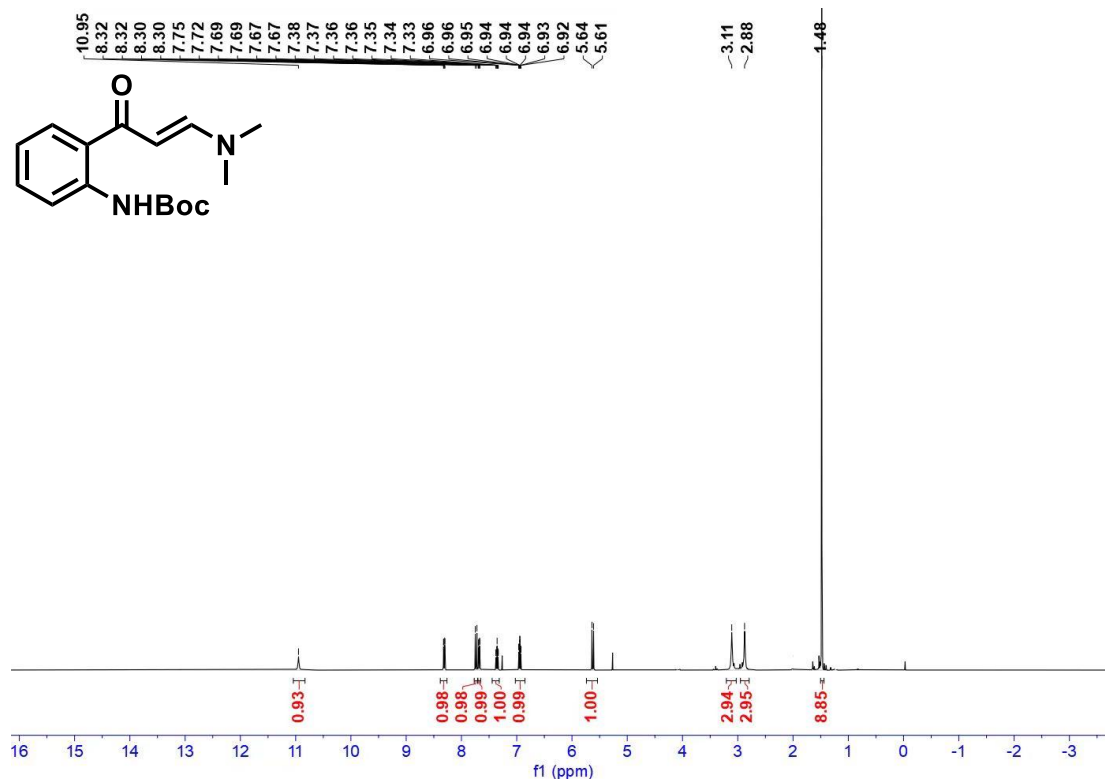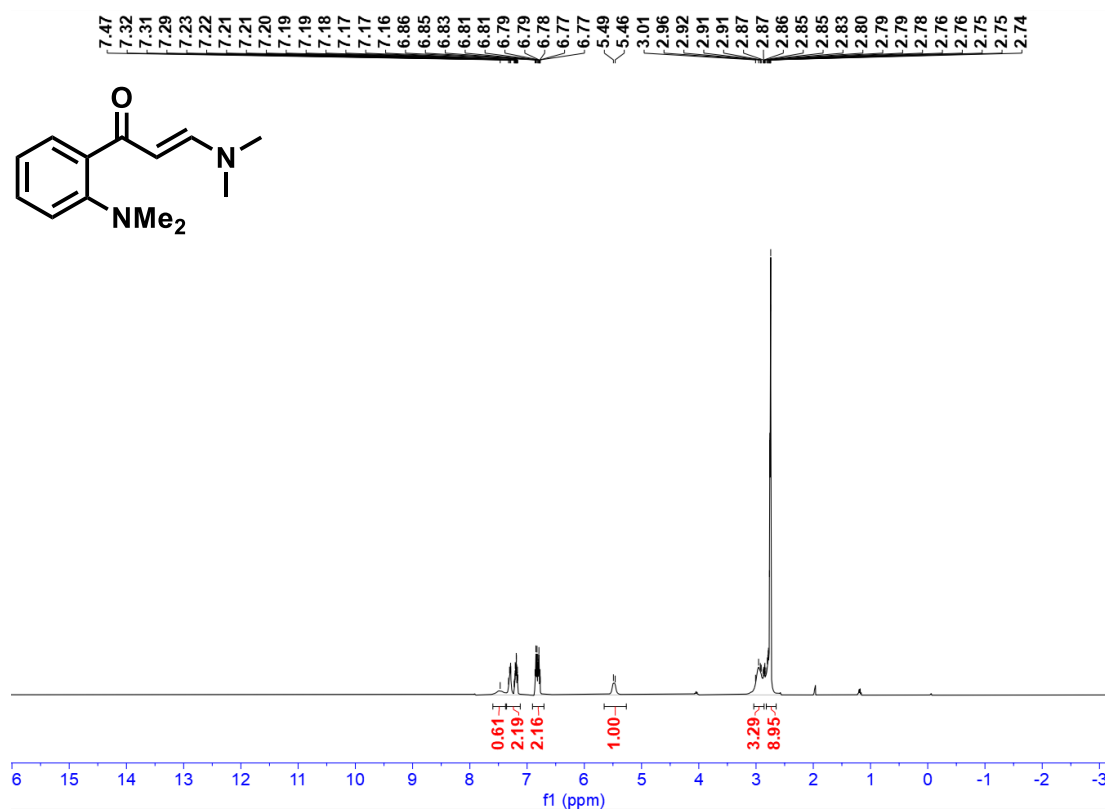

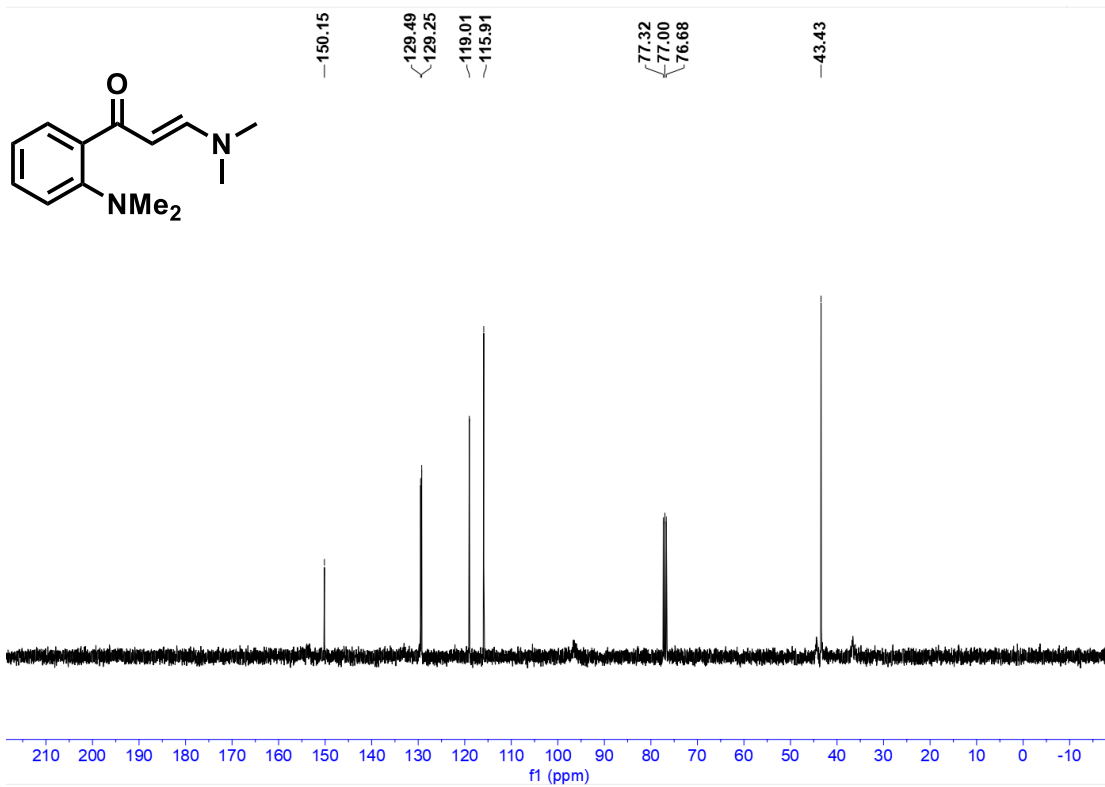

### NMR spectra for 1,3-dicarbonyl-alkenes:

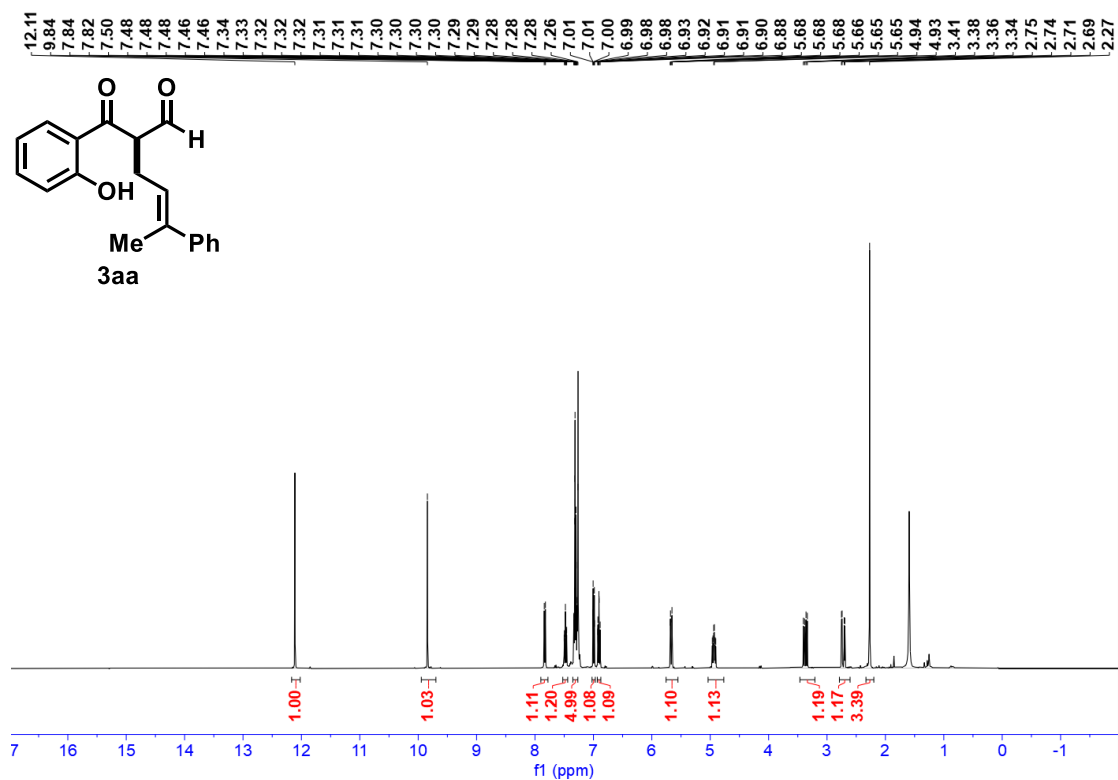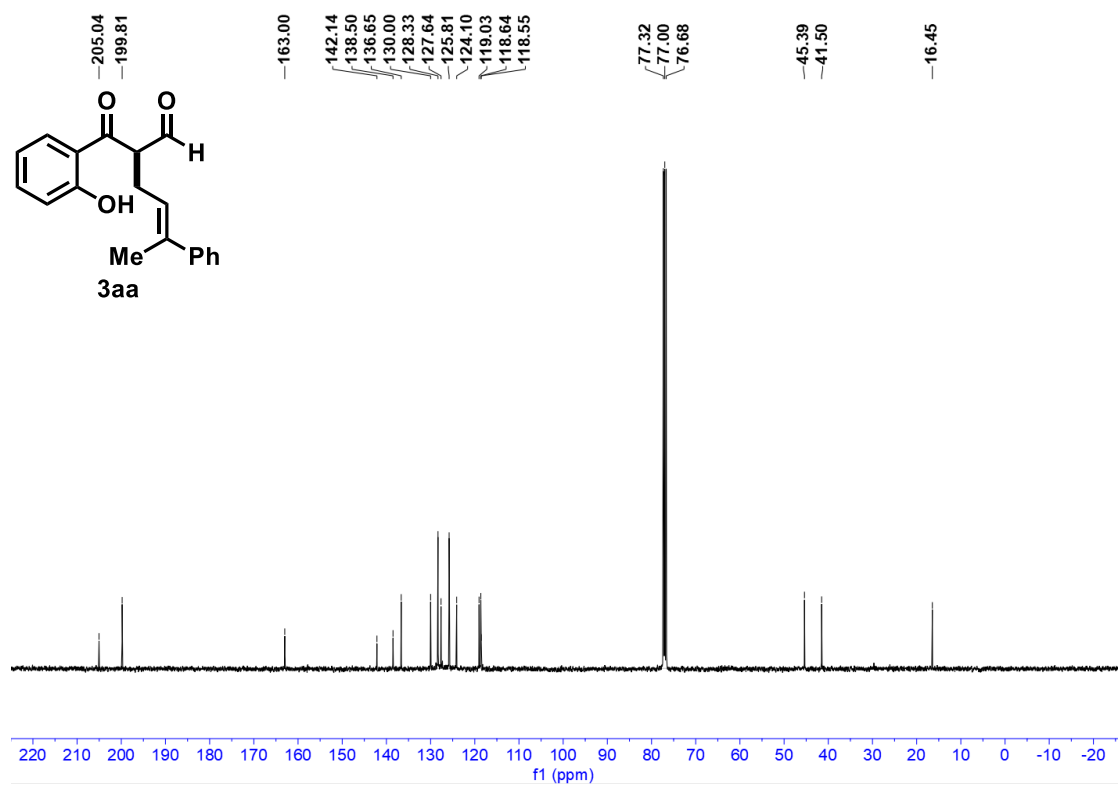

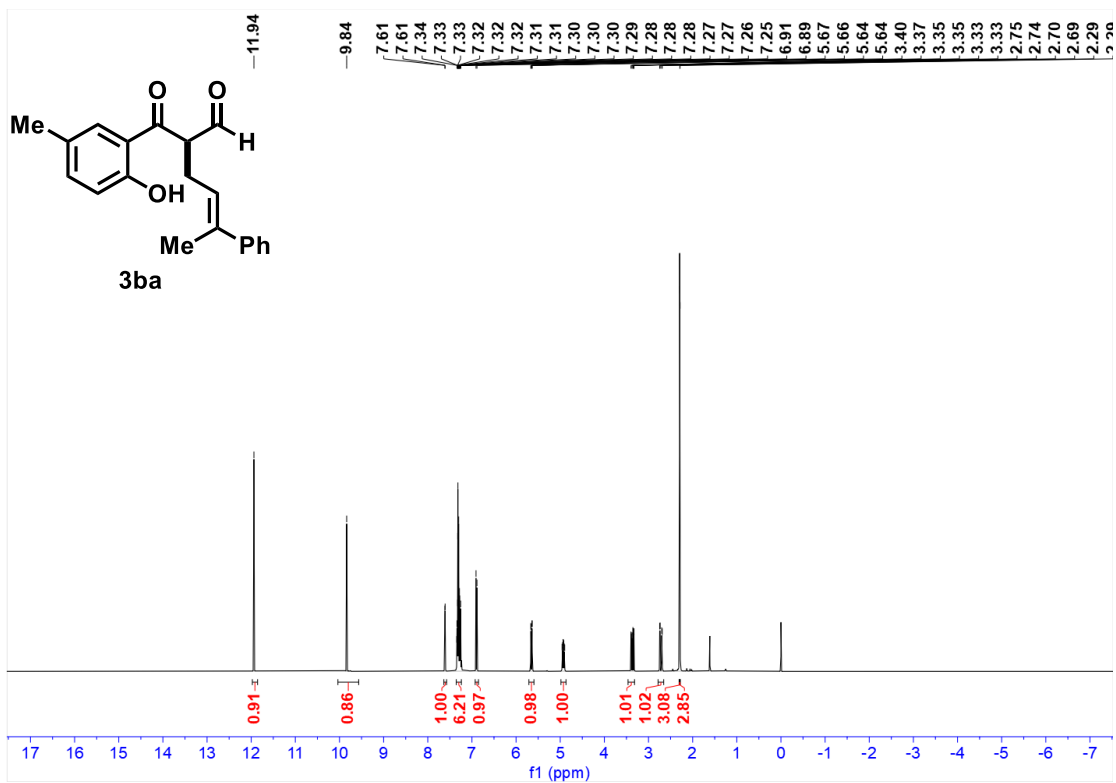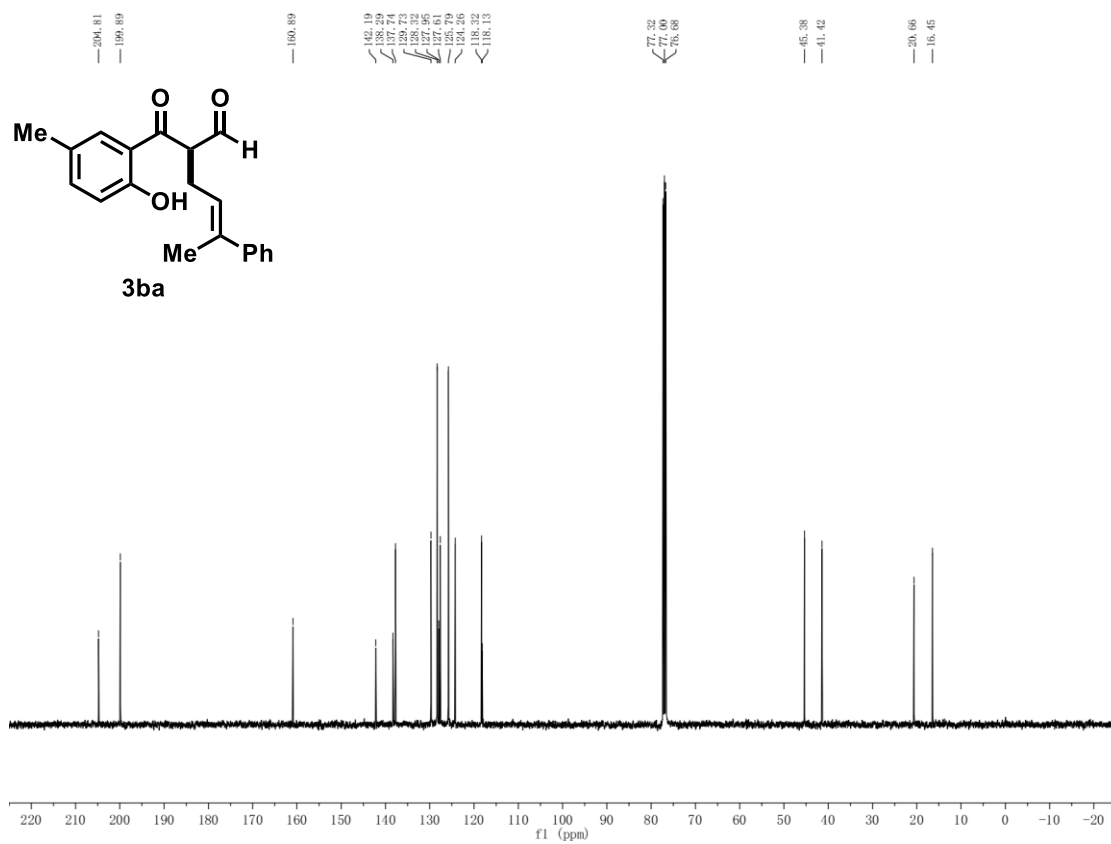

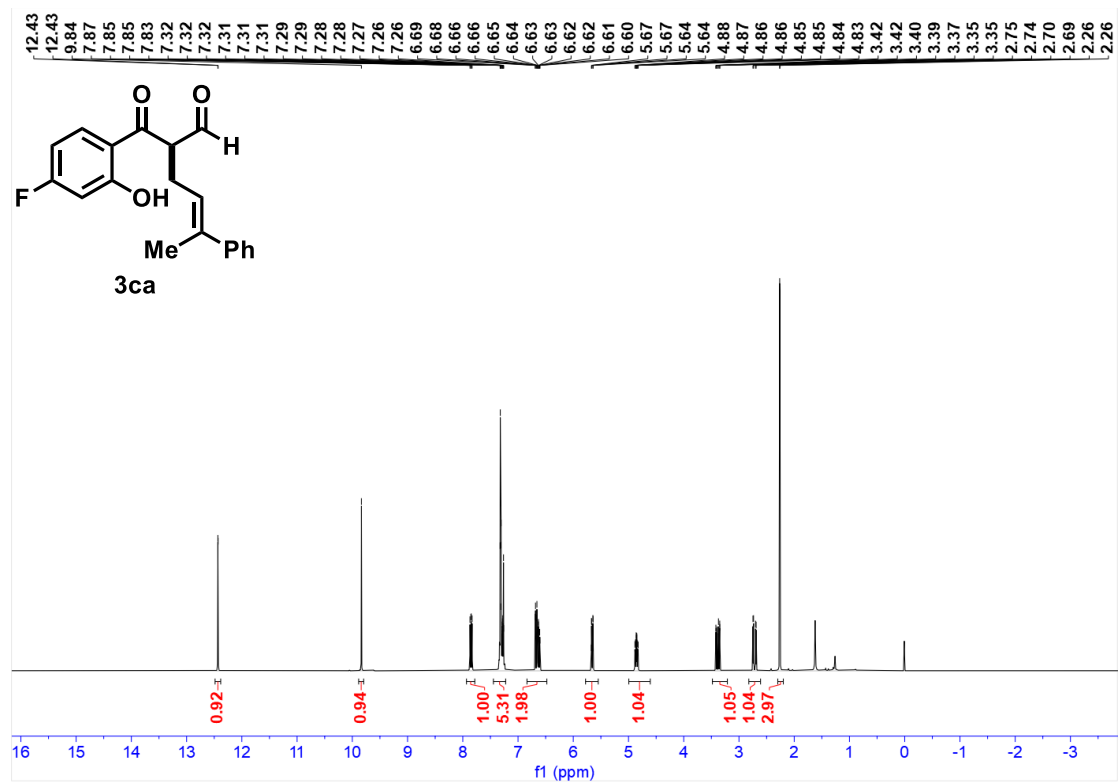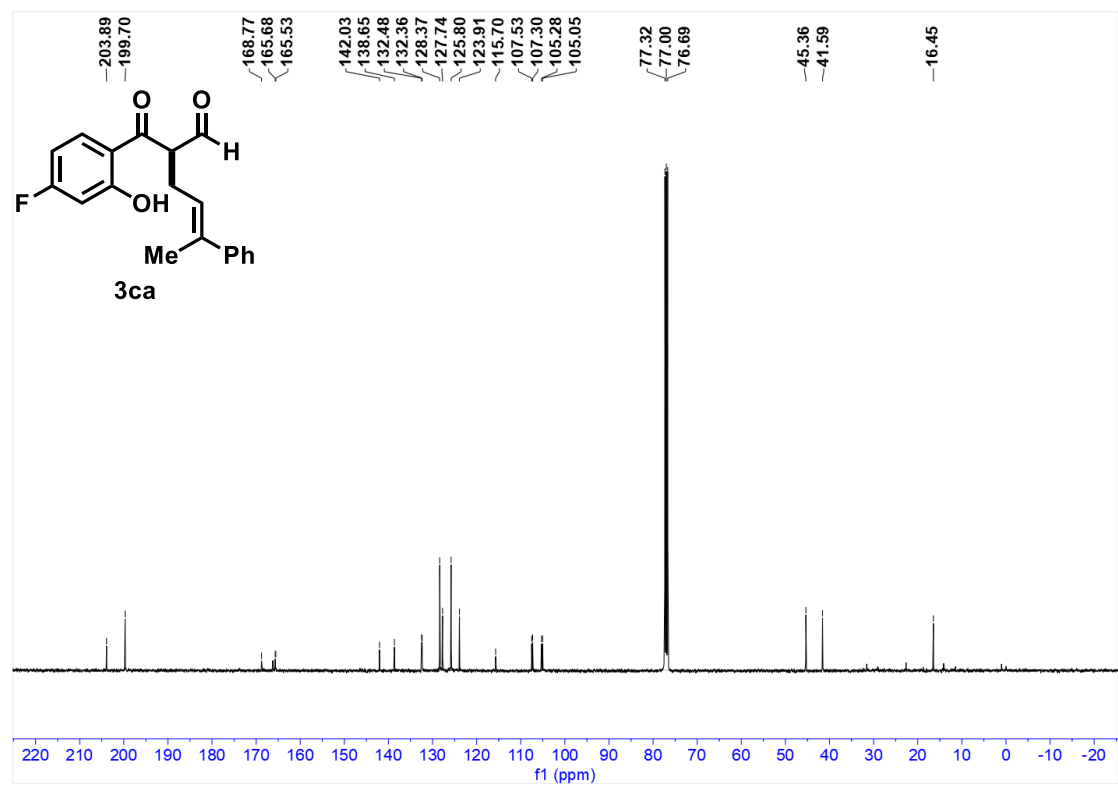

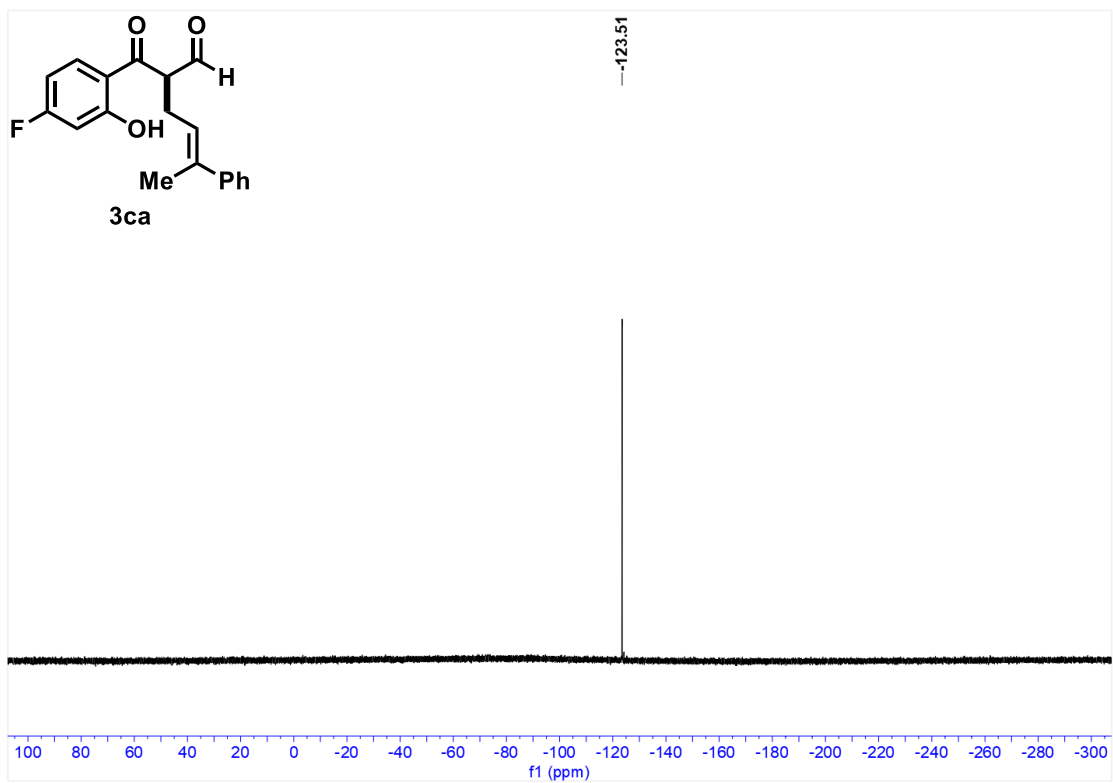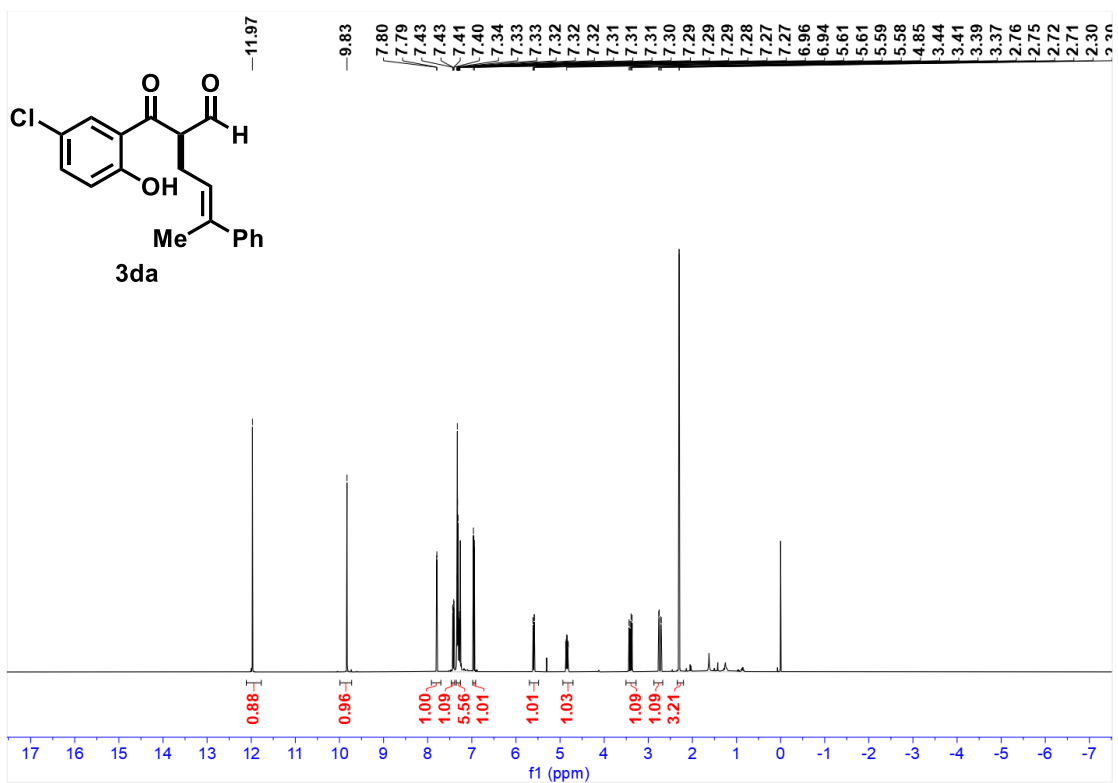

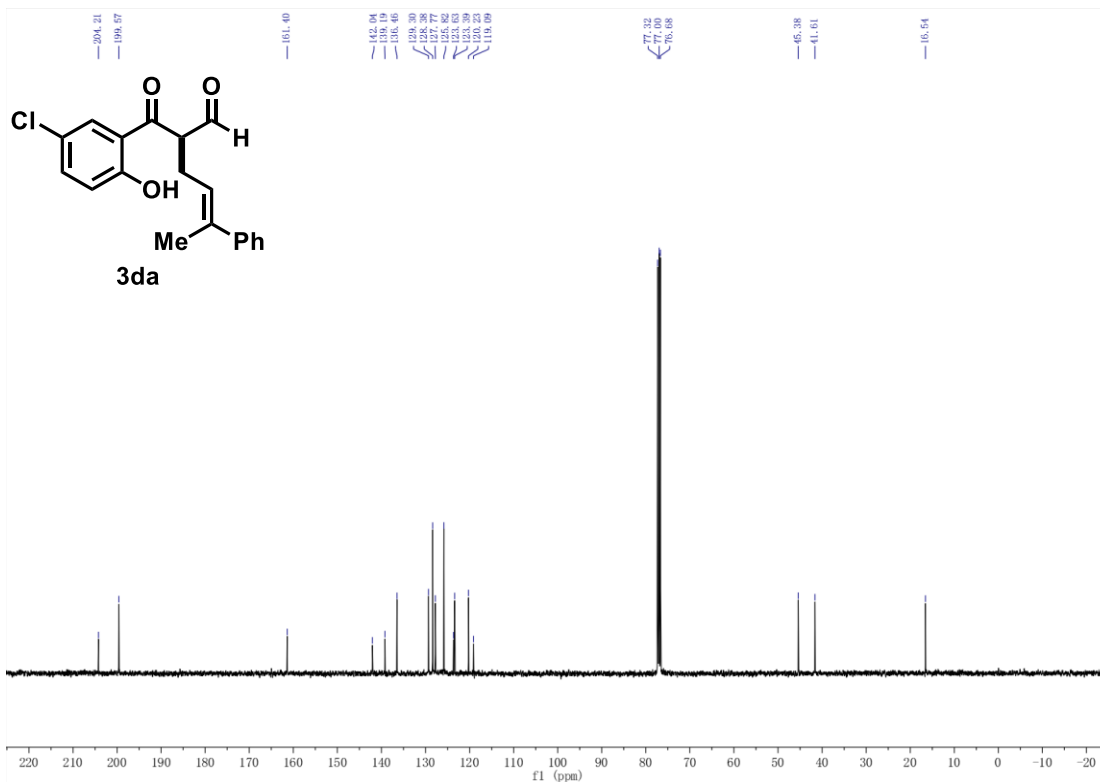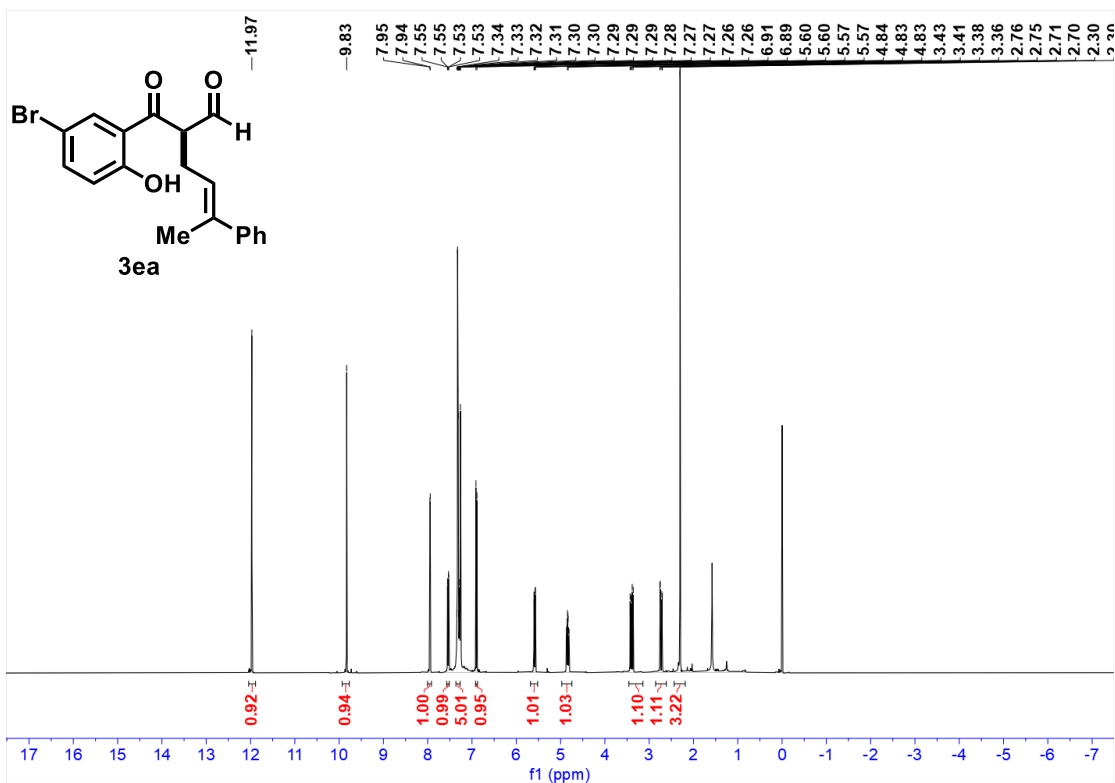

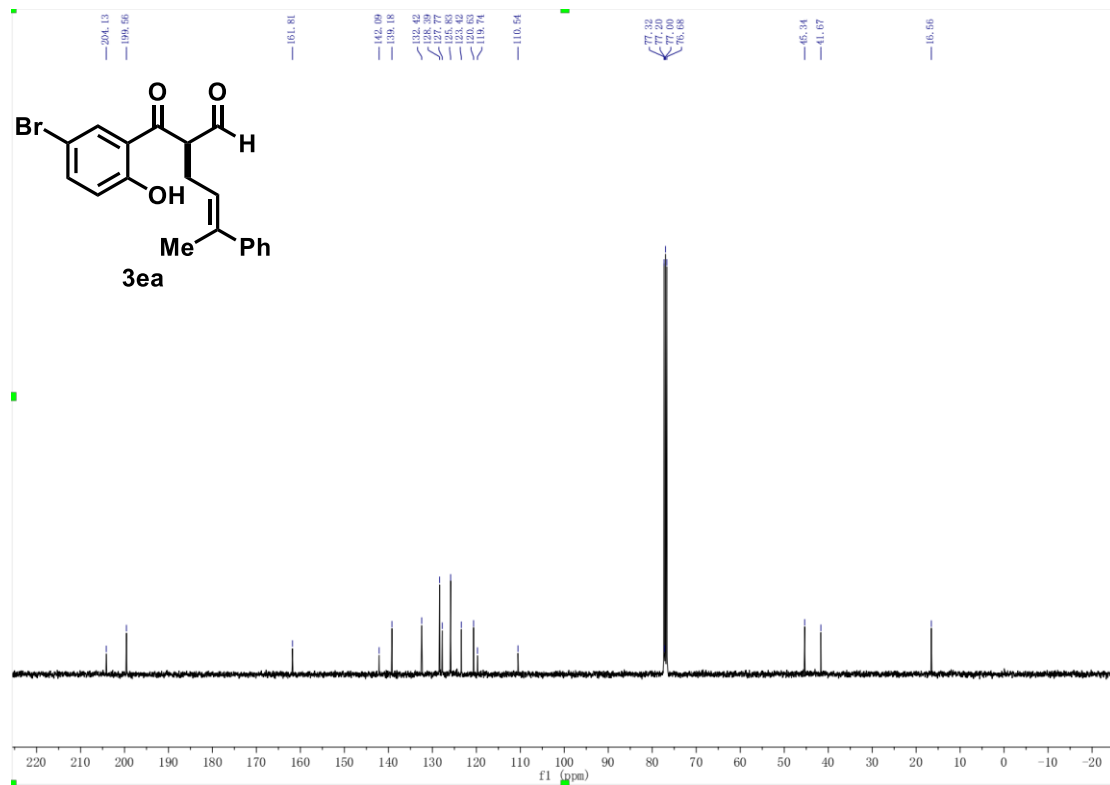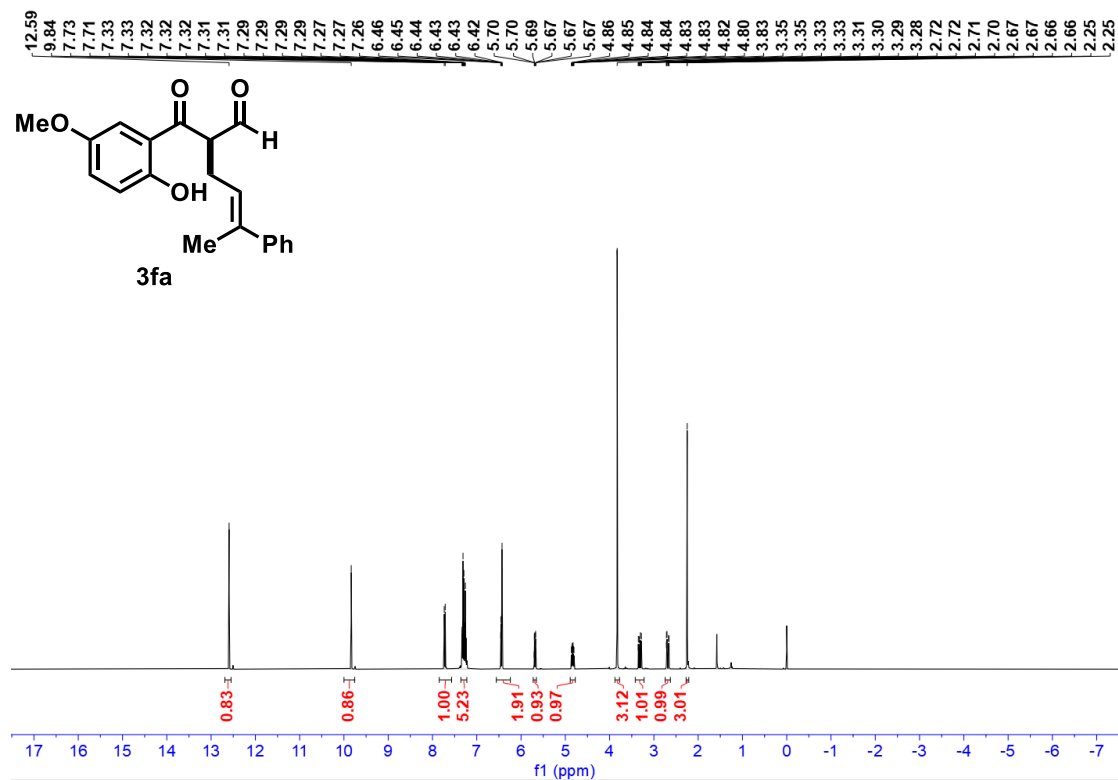



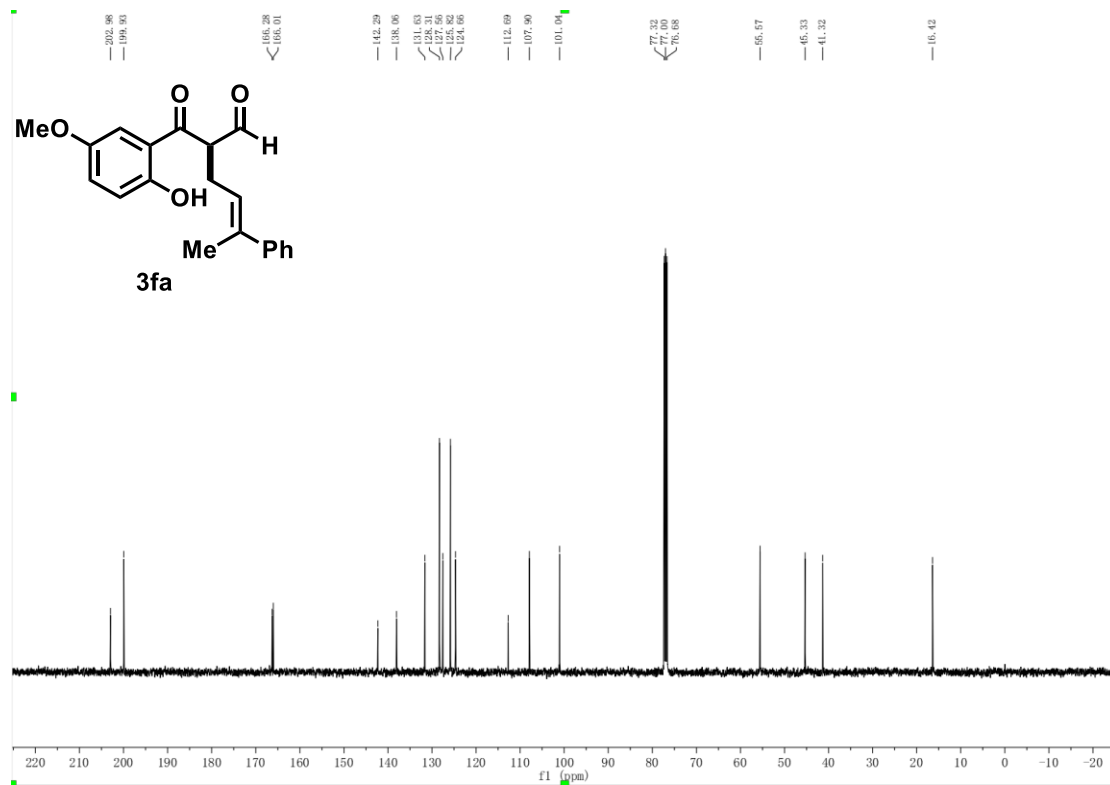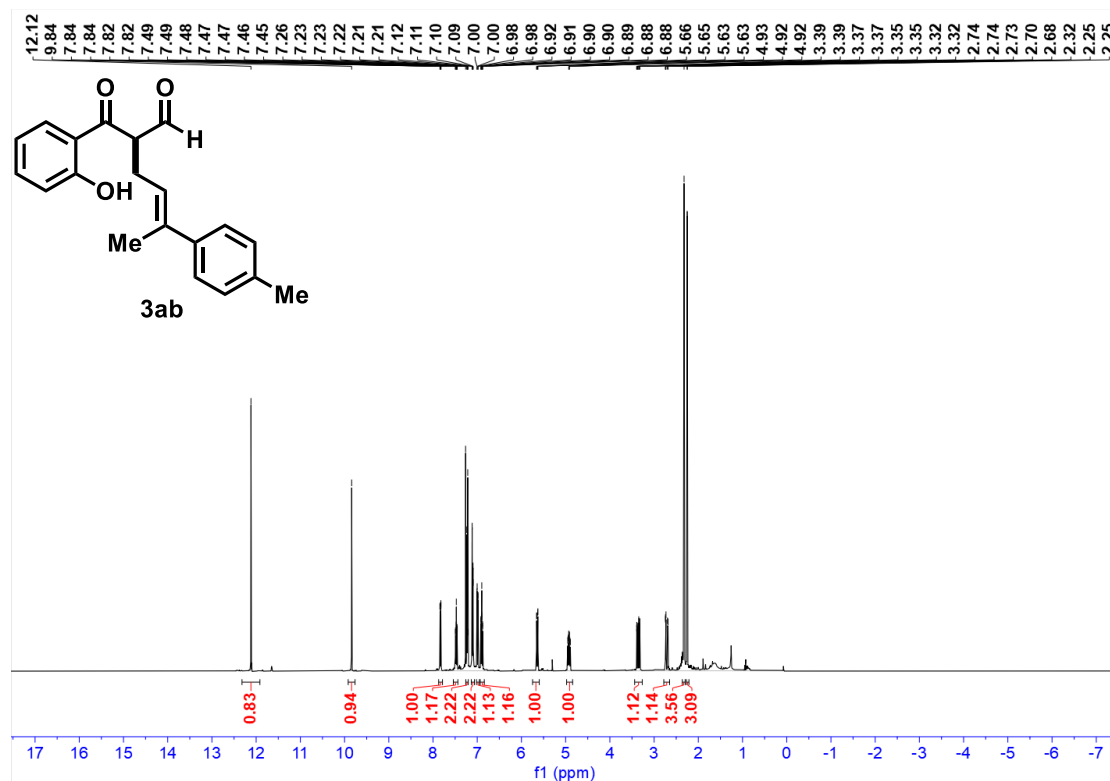

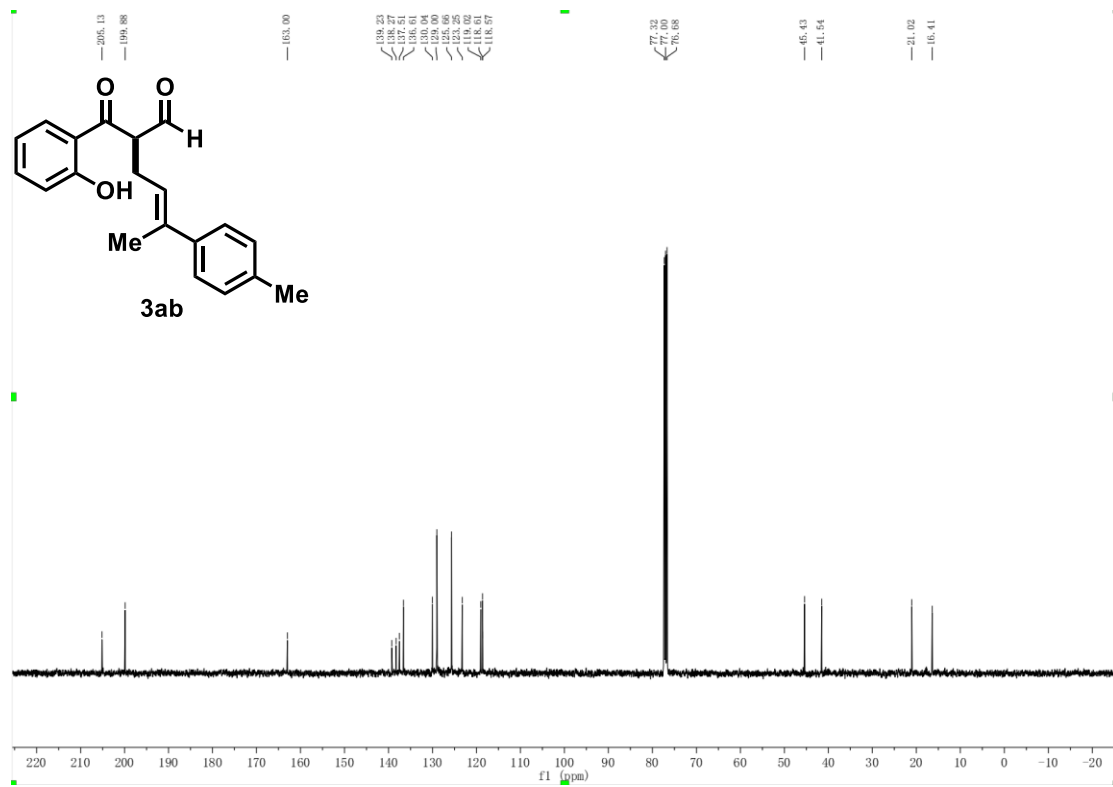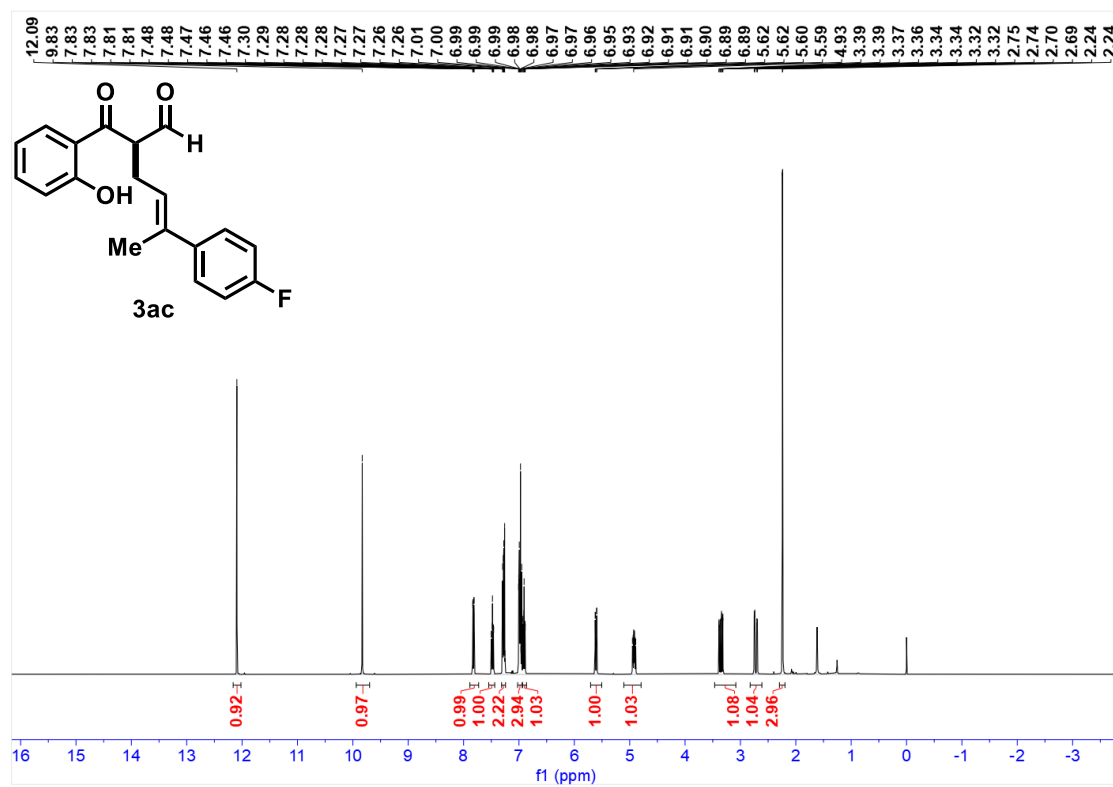

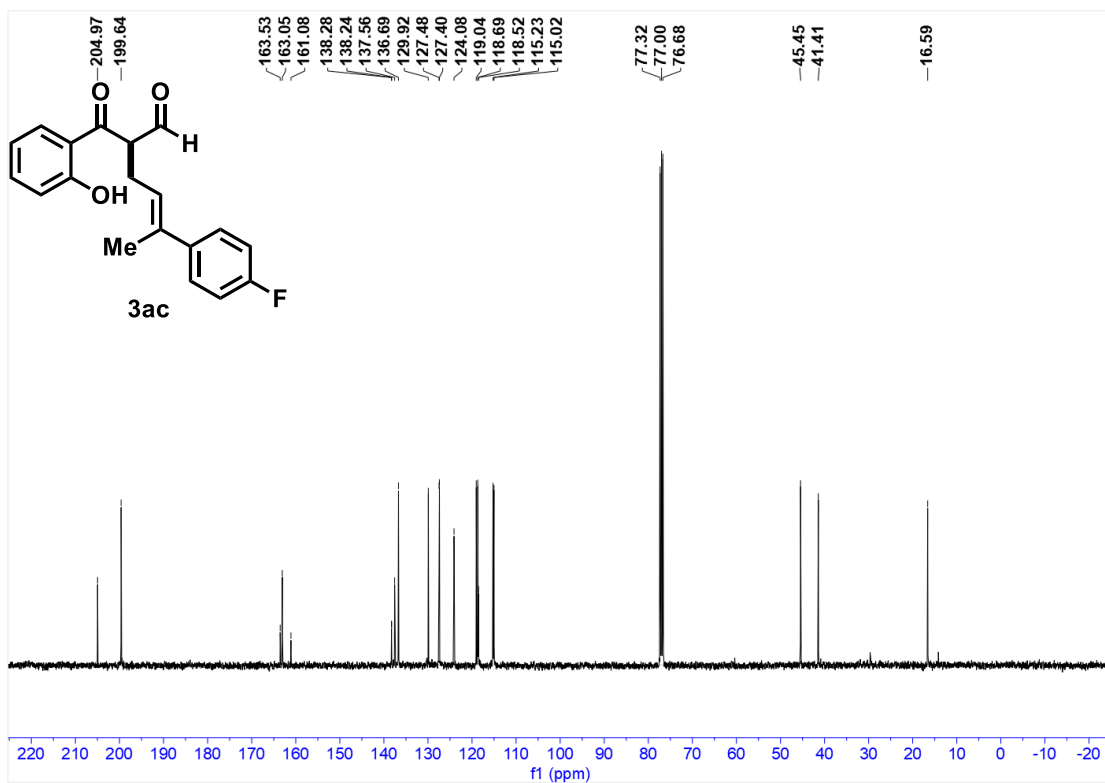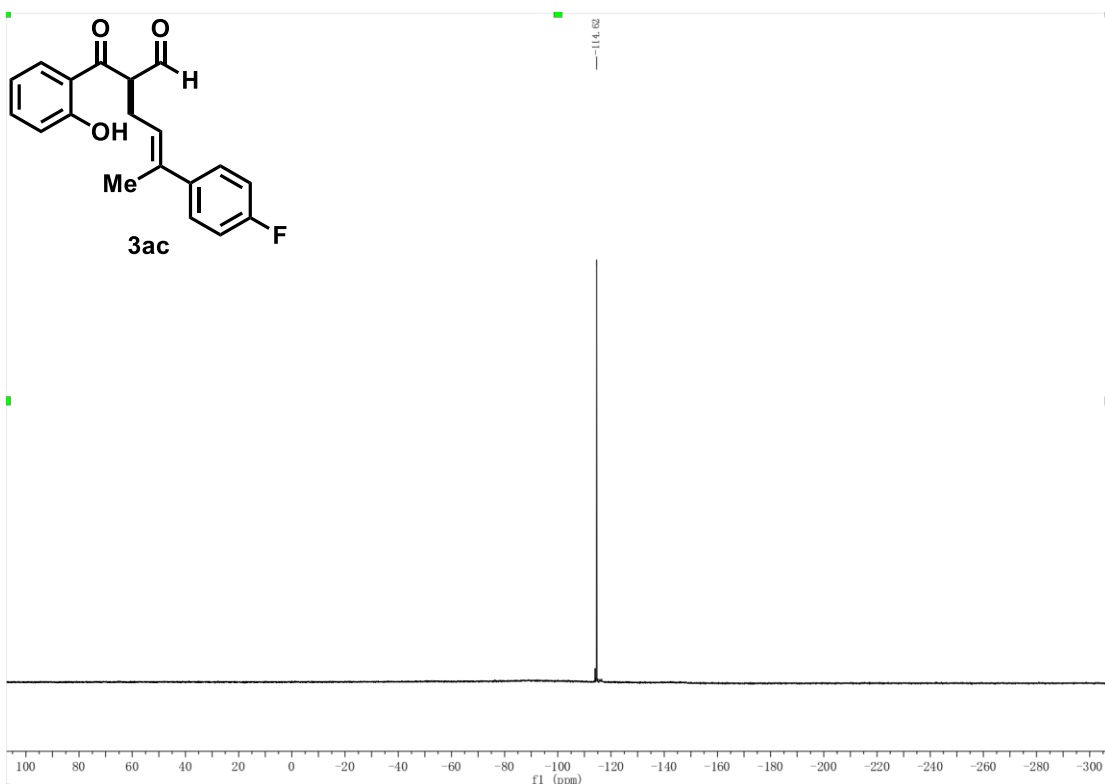

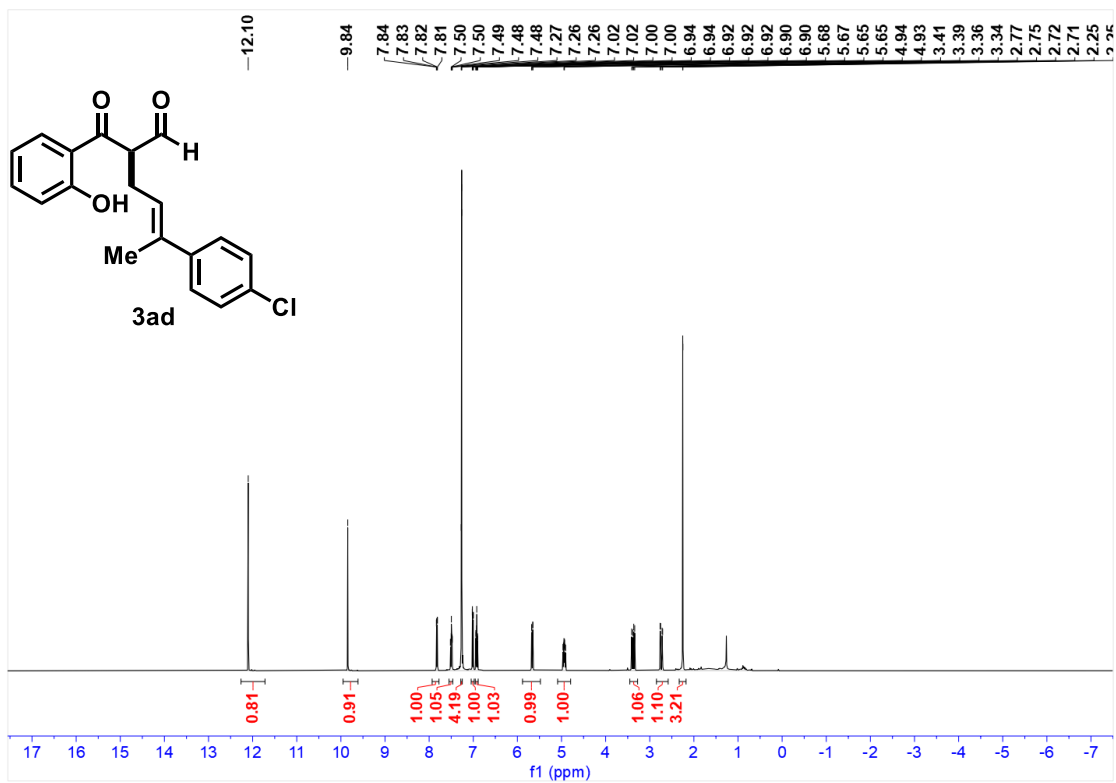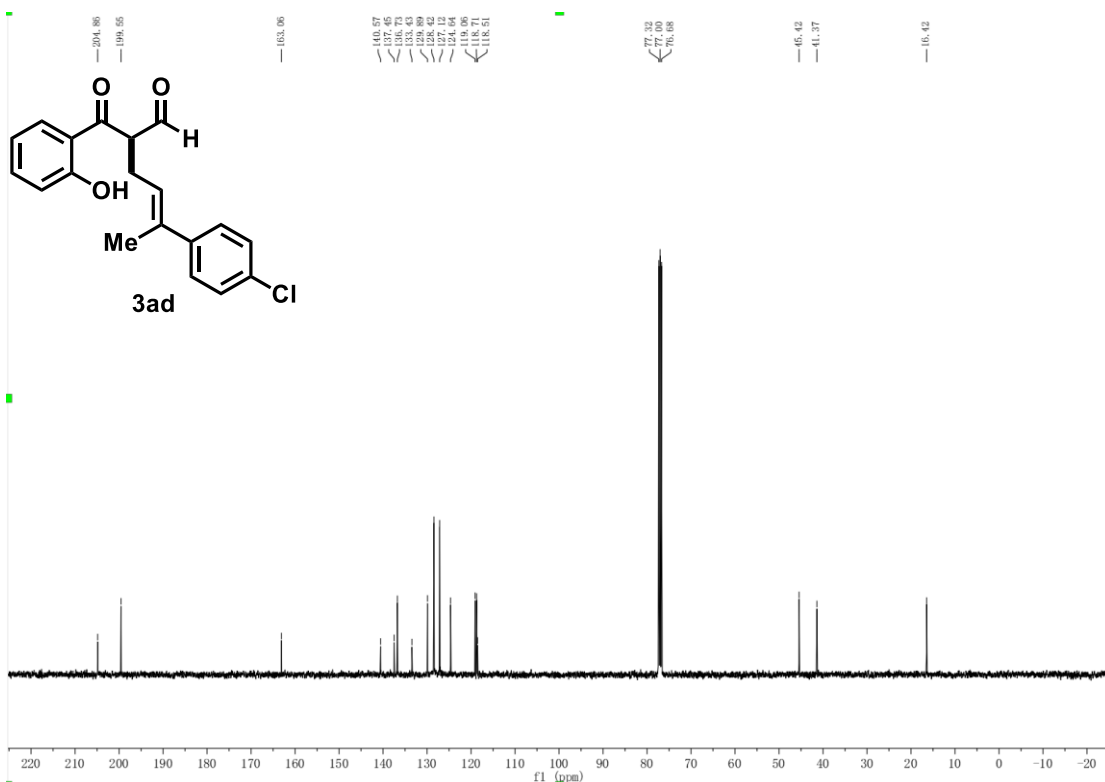

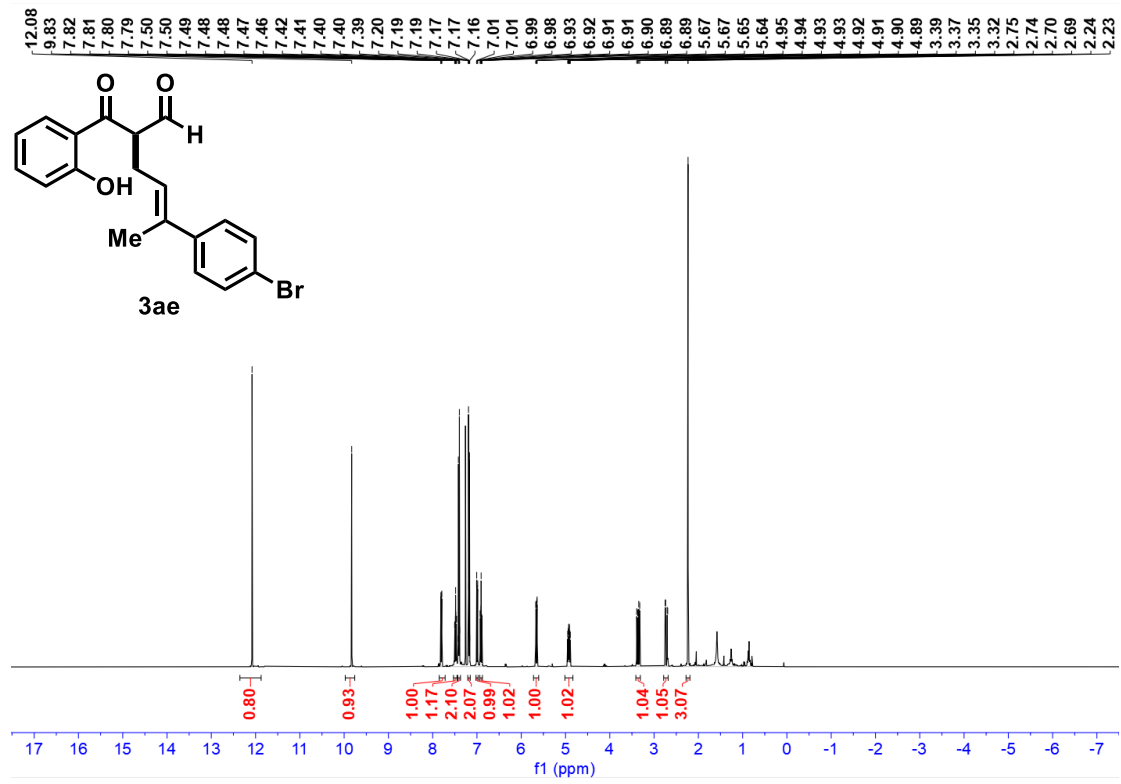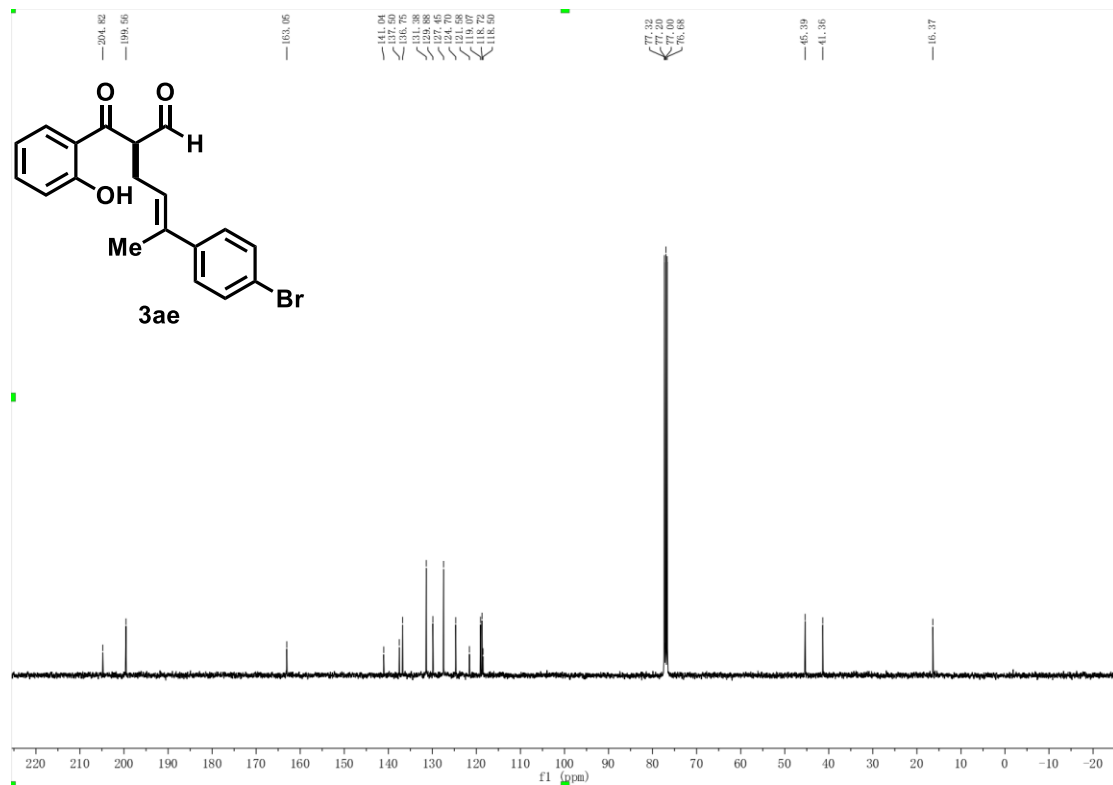

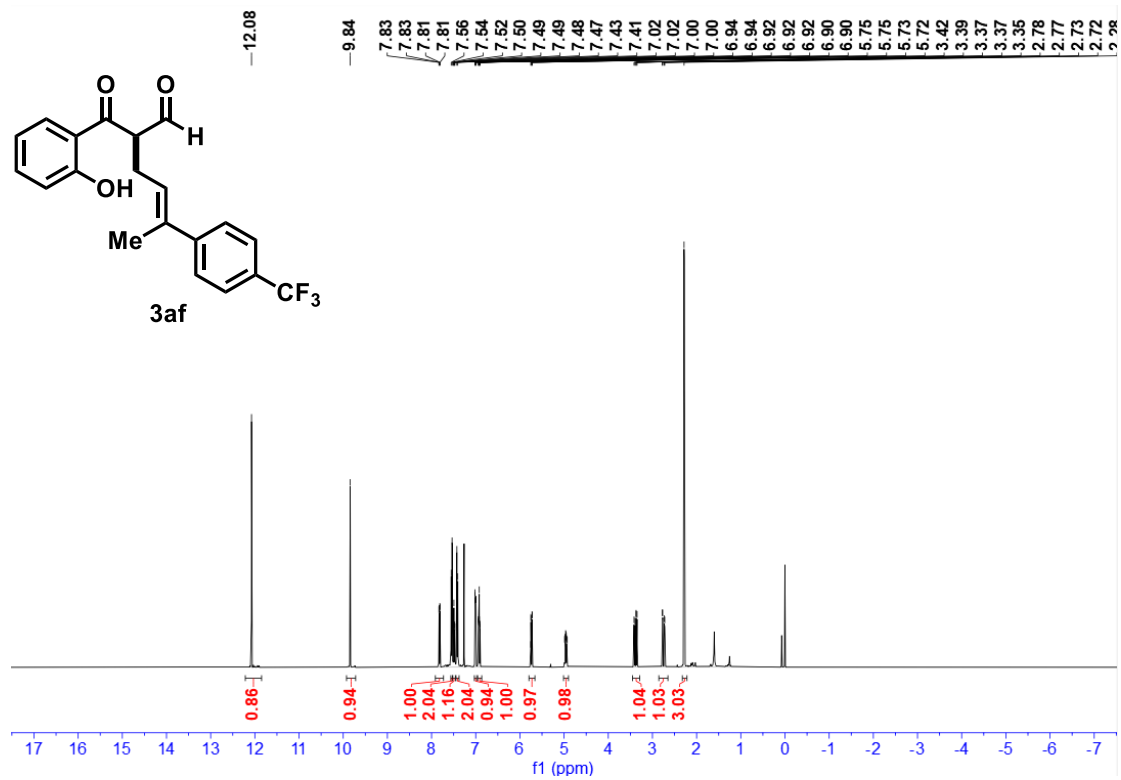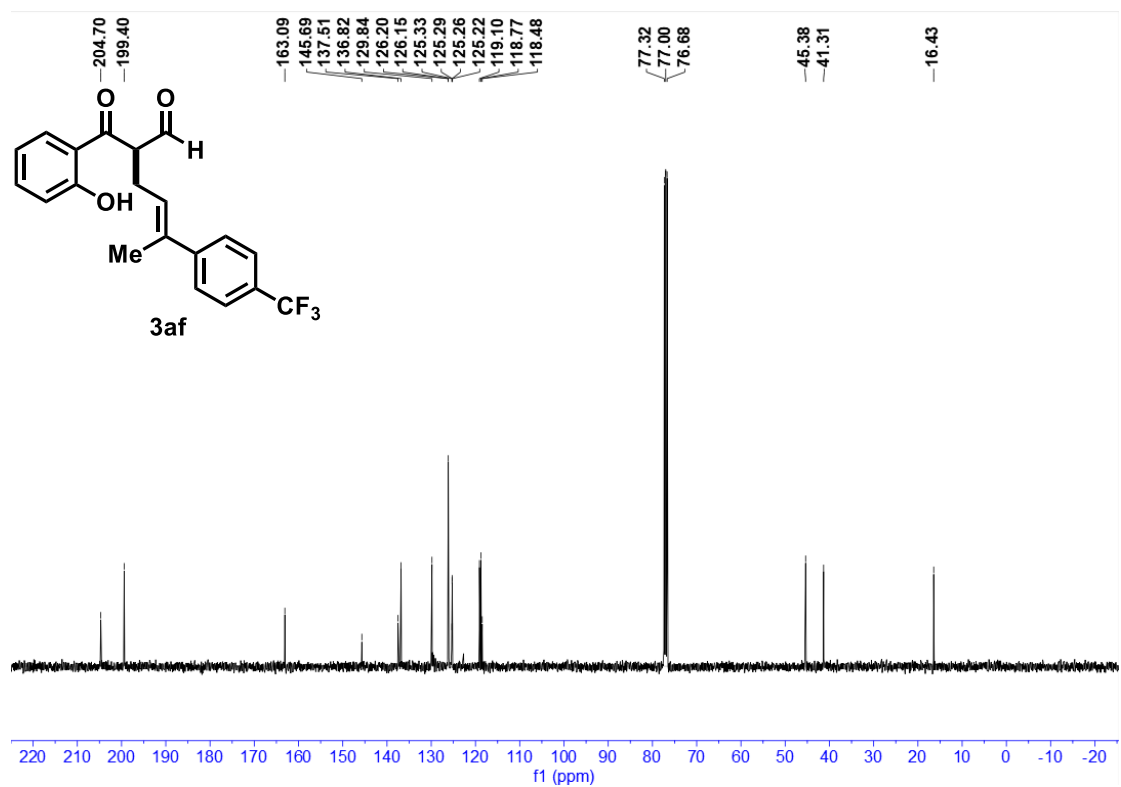

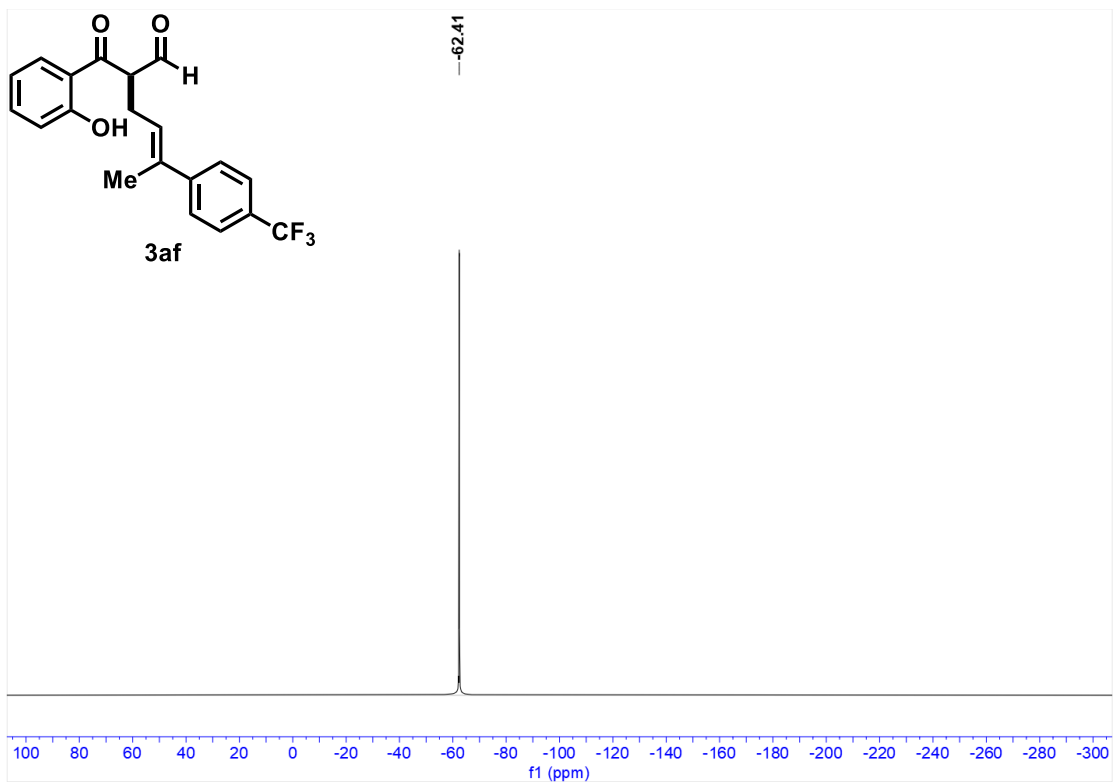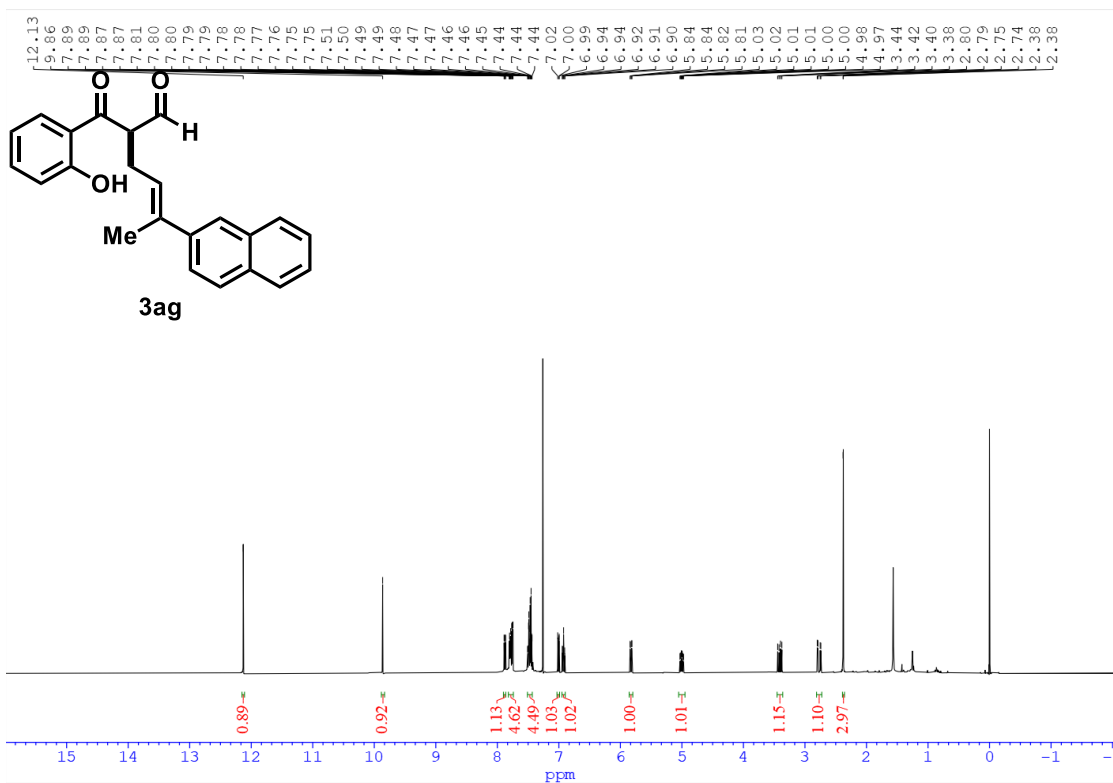

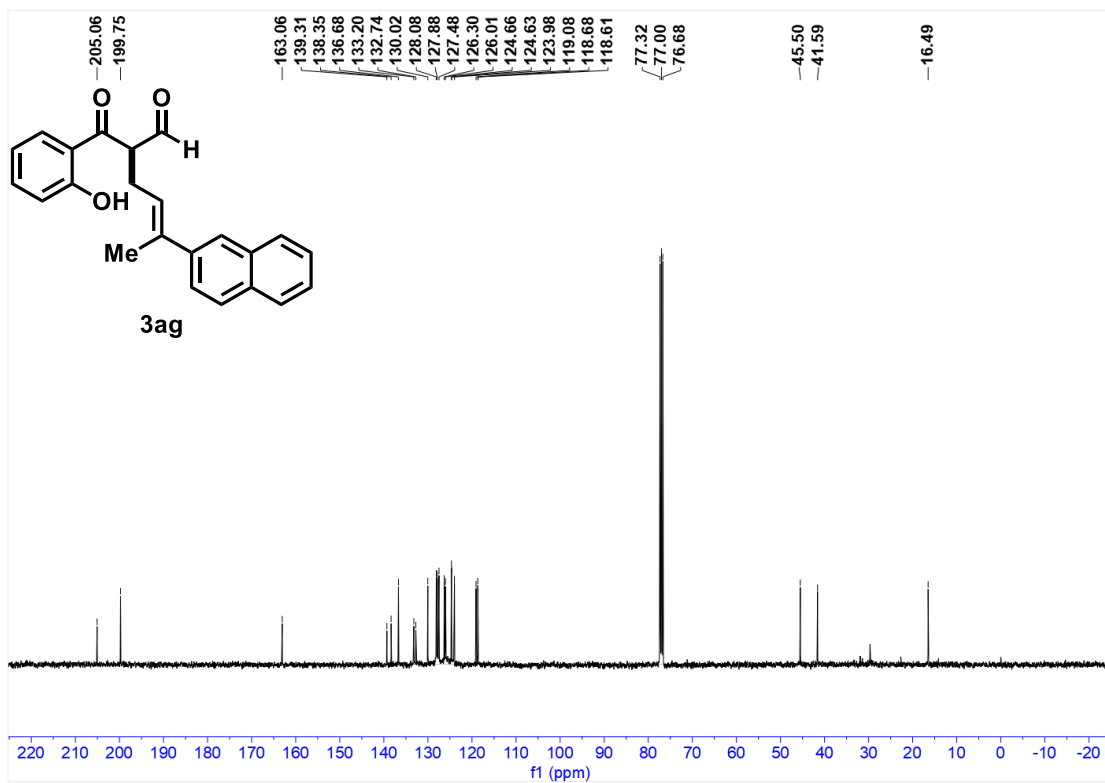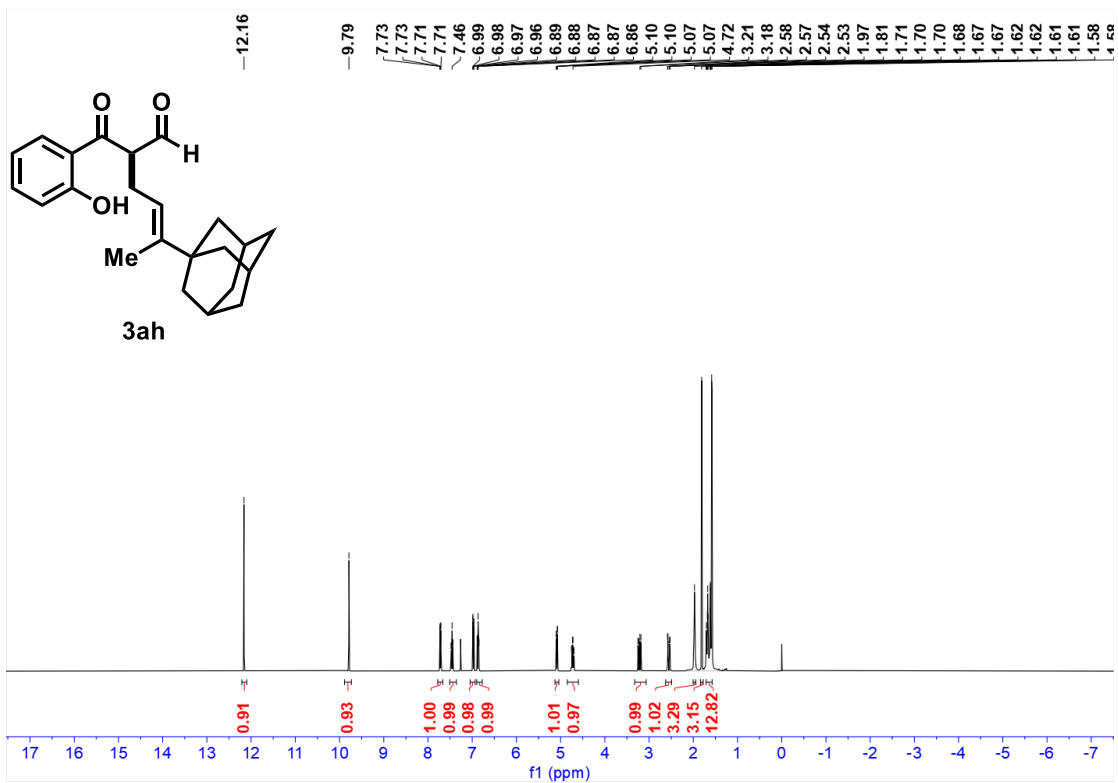



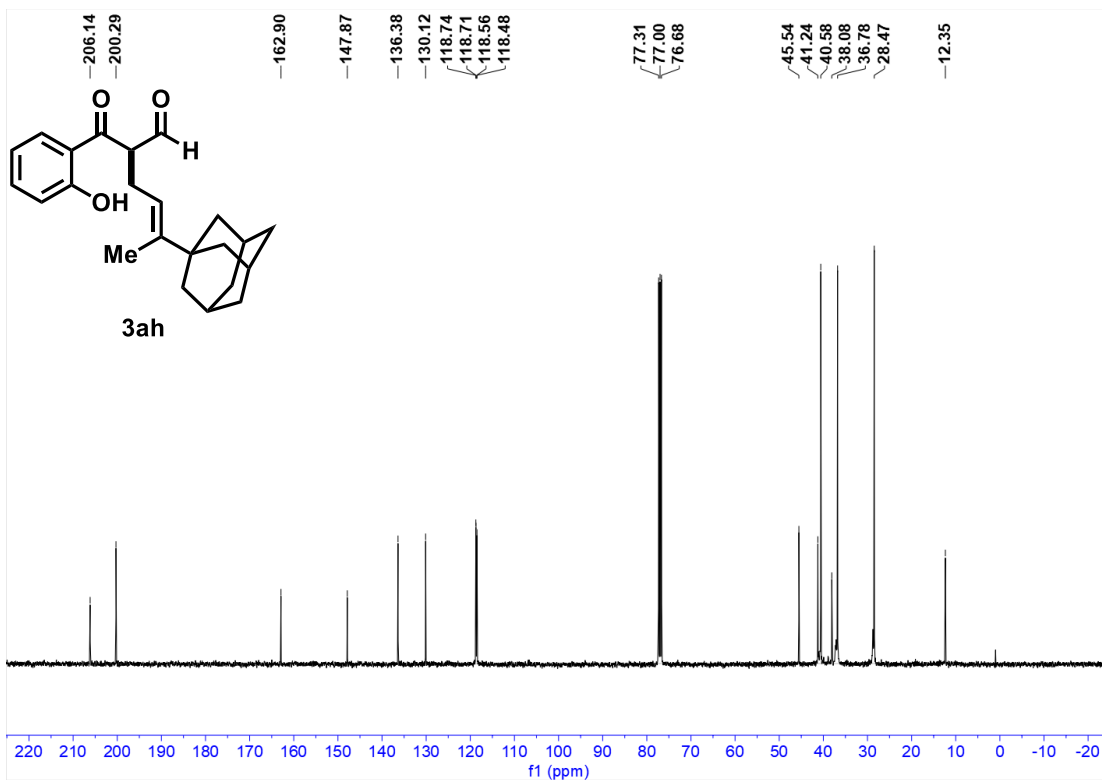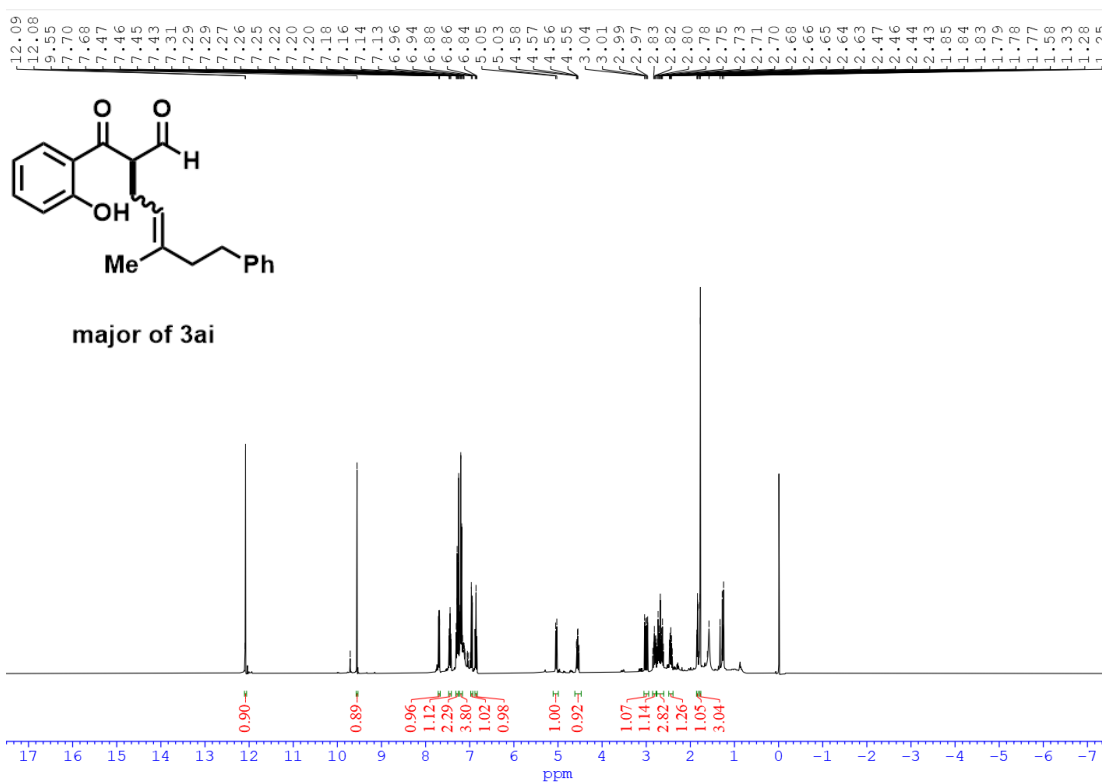

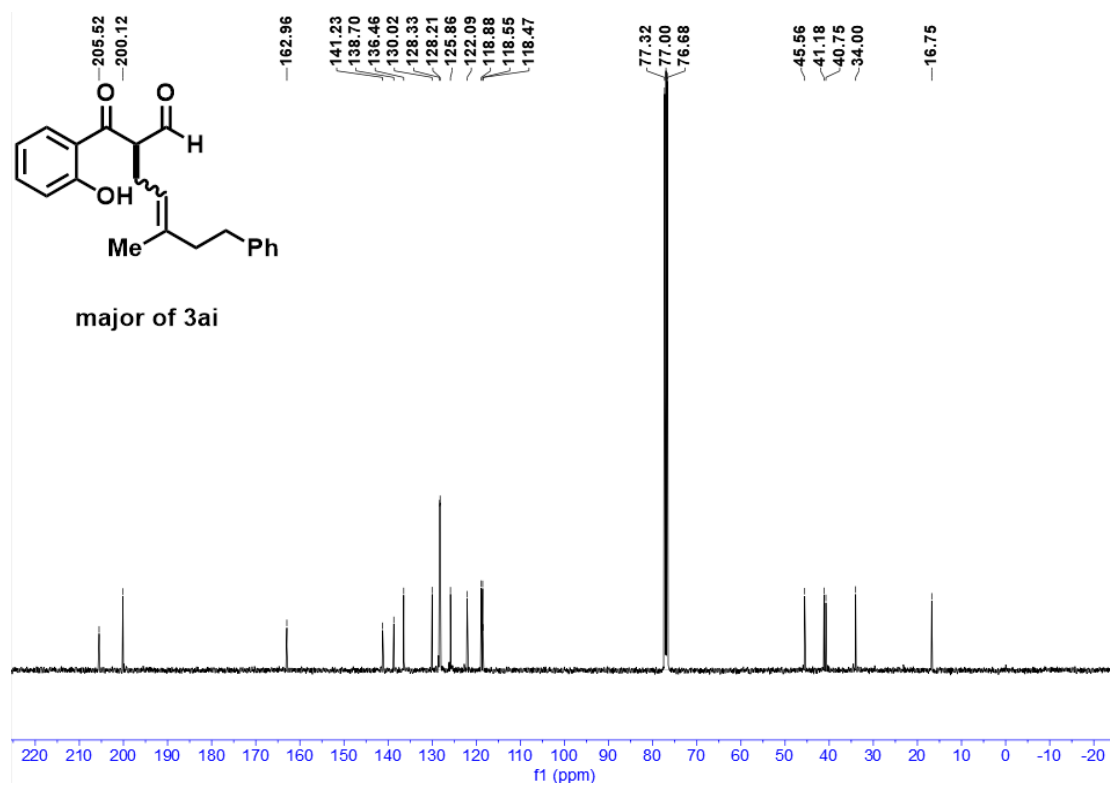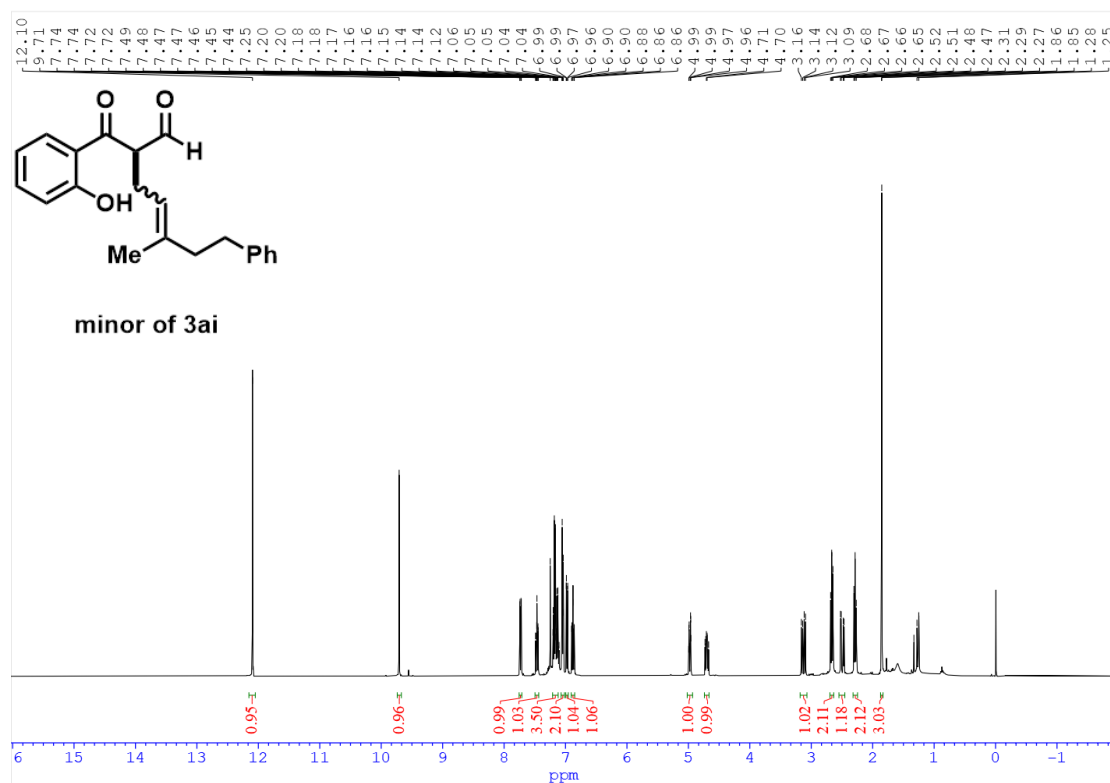

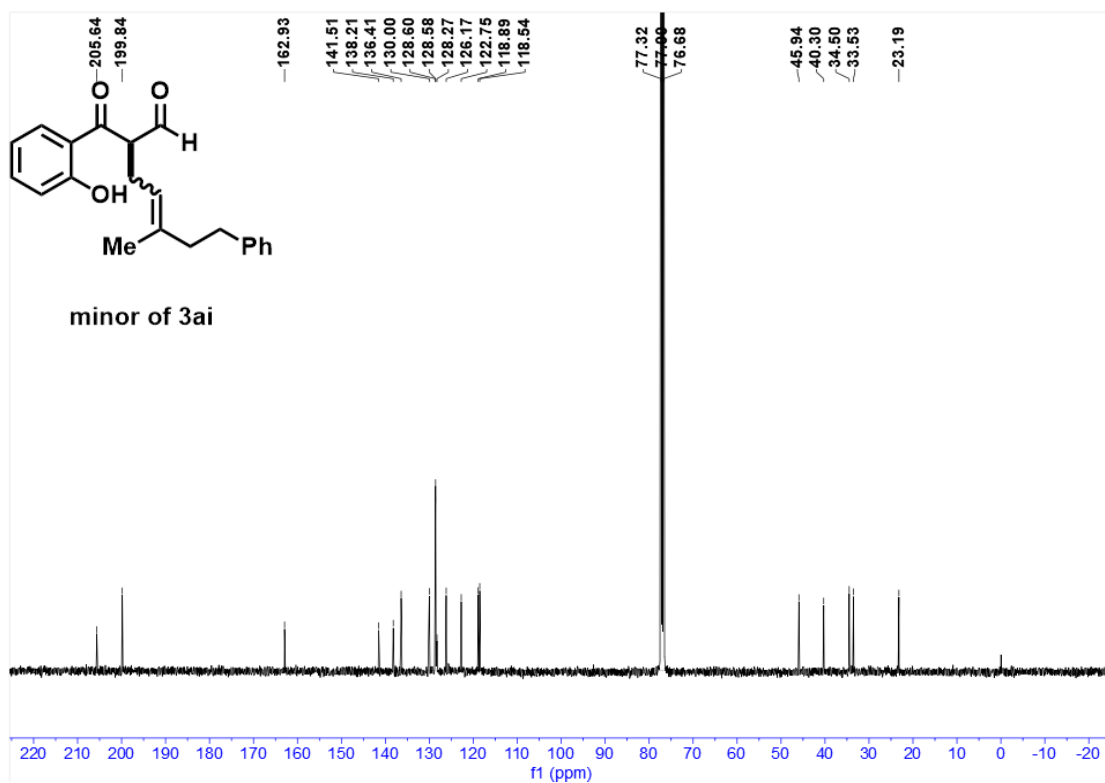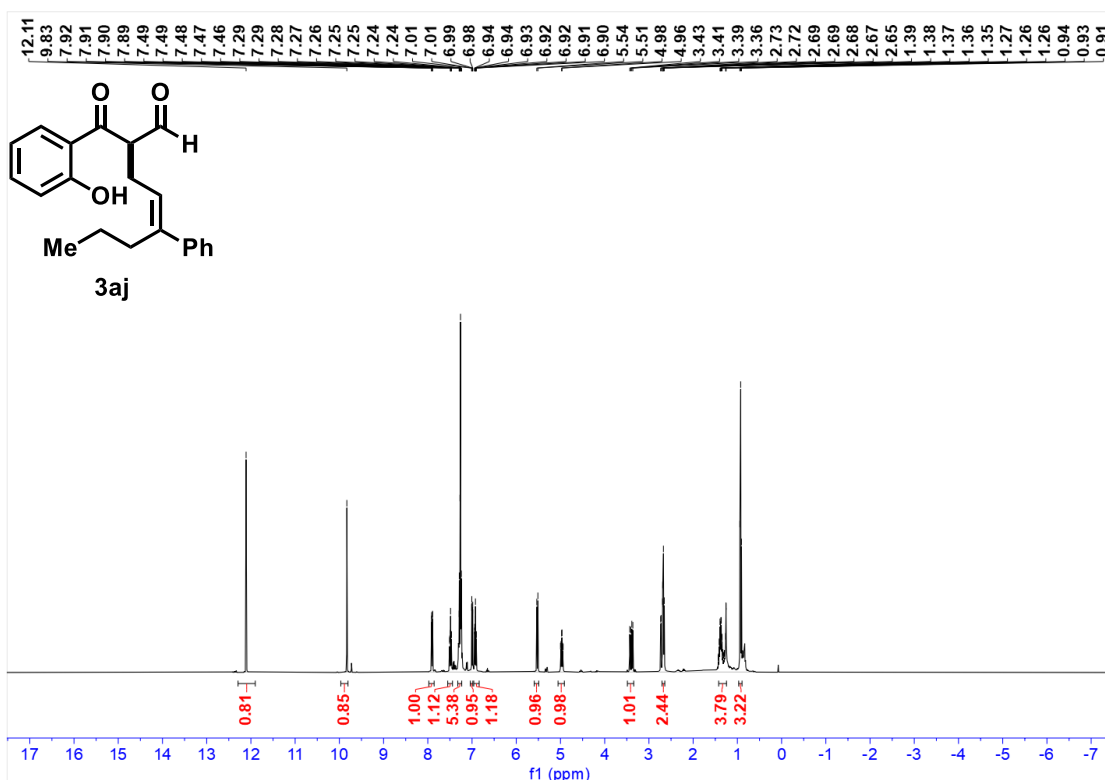

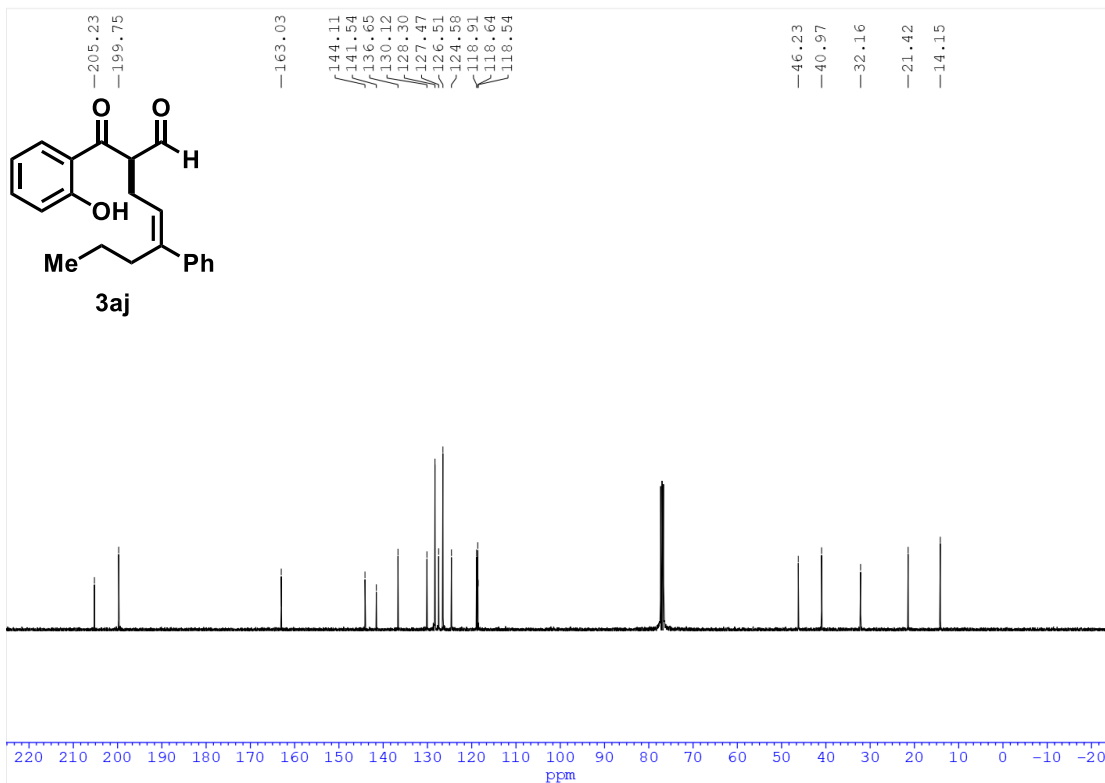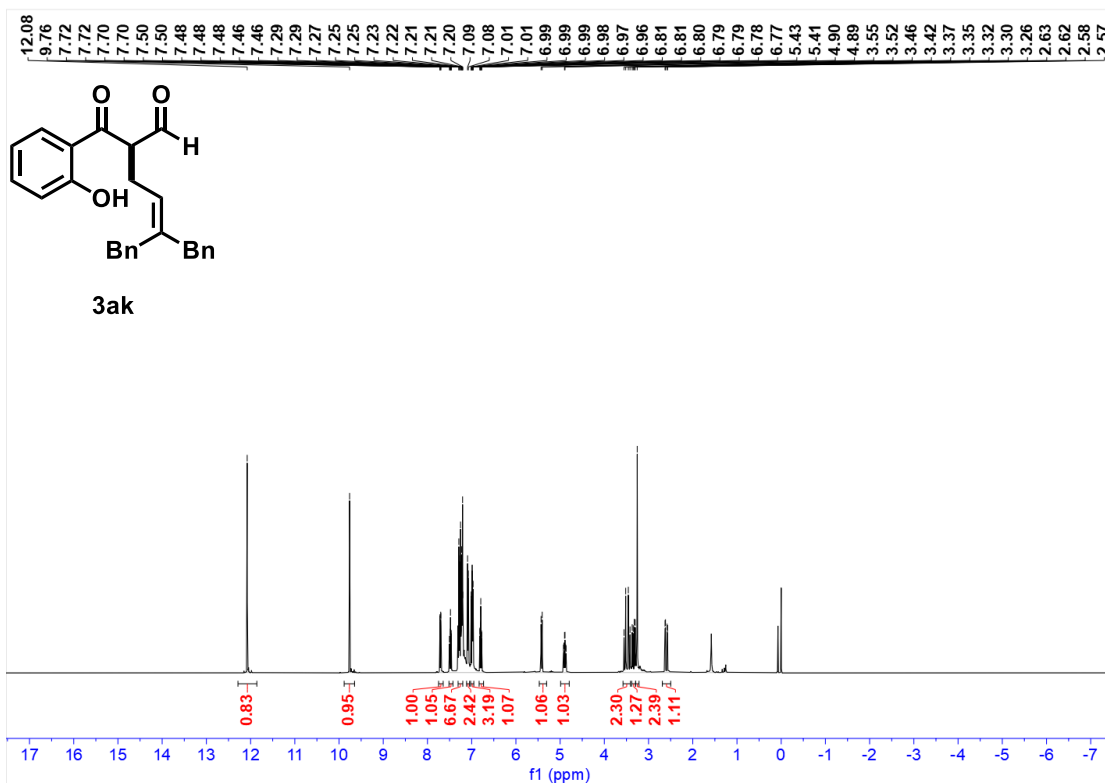

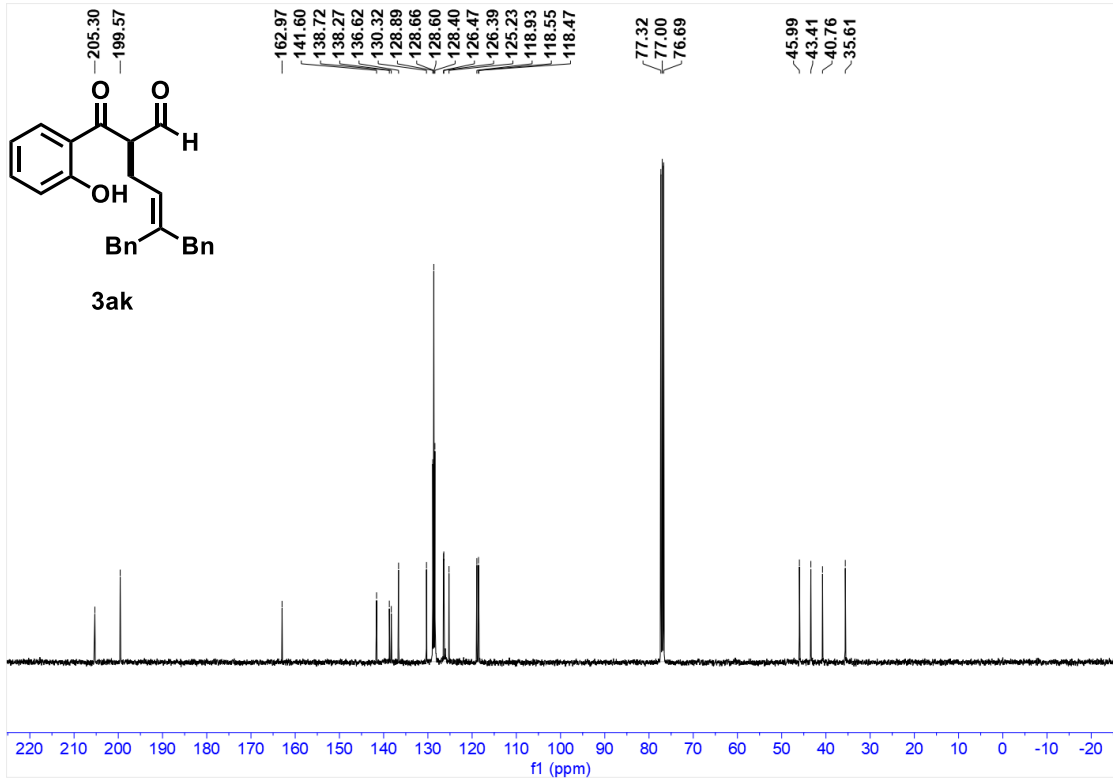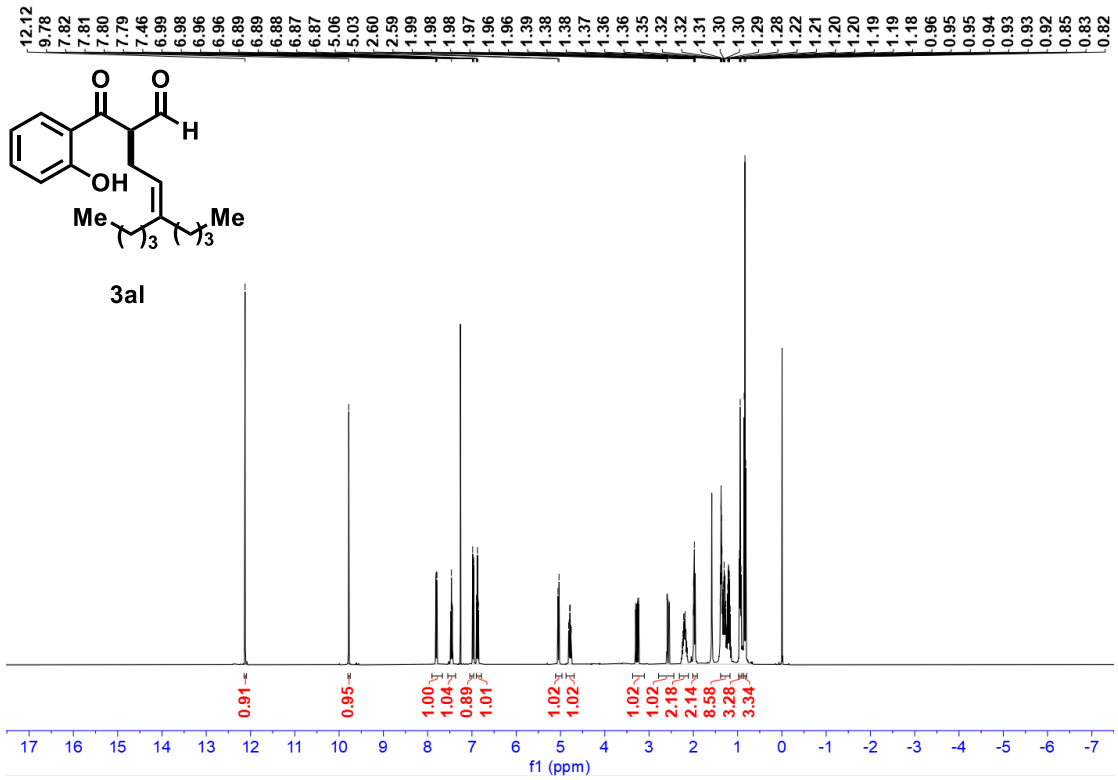

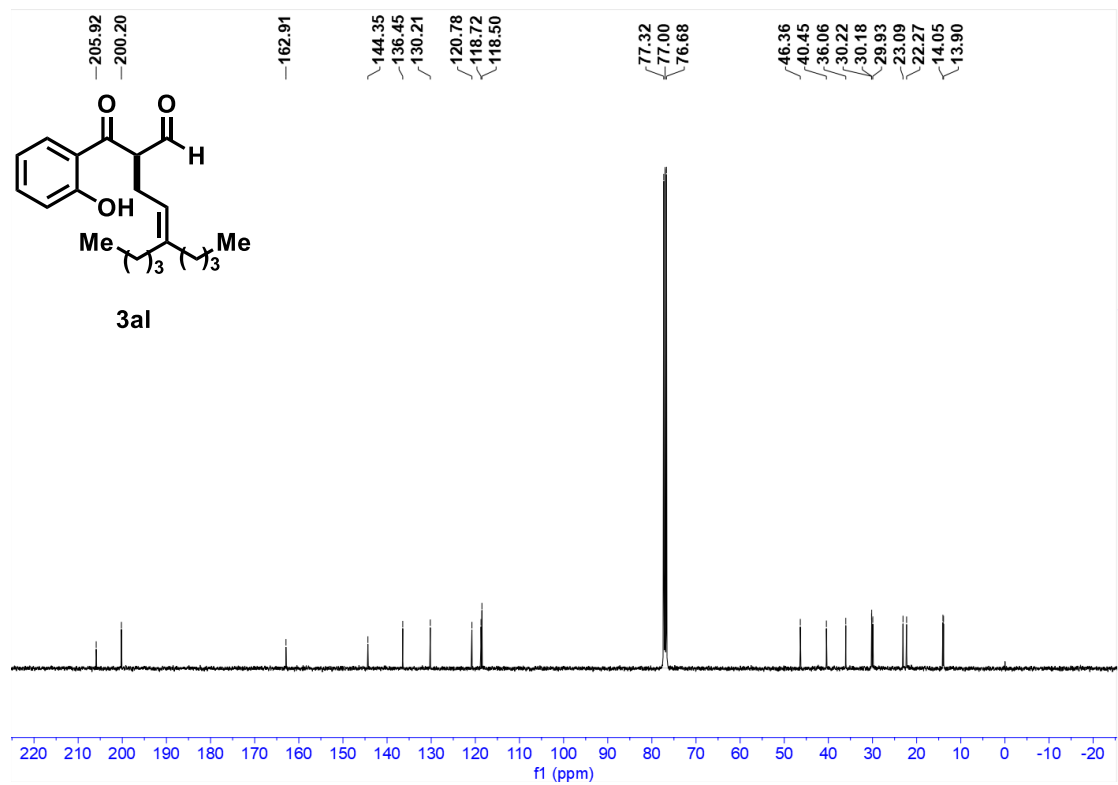

## NMR spectra for 1,4-dicarbonyl-alkenes:

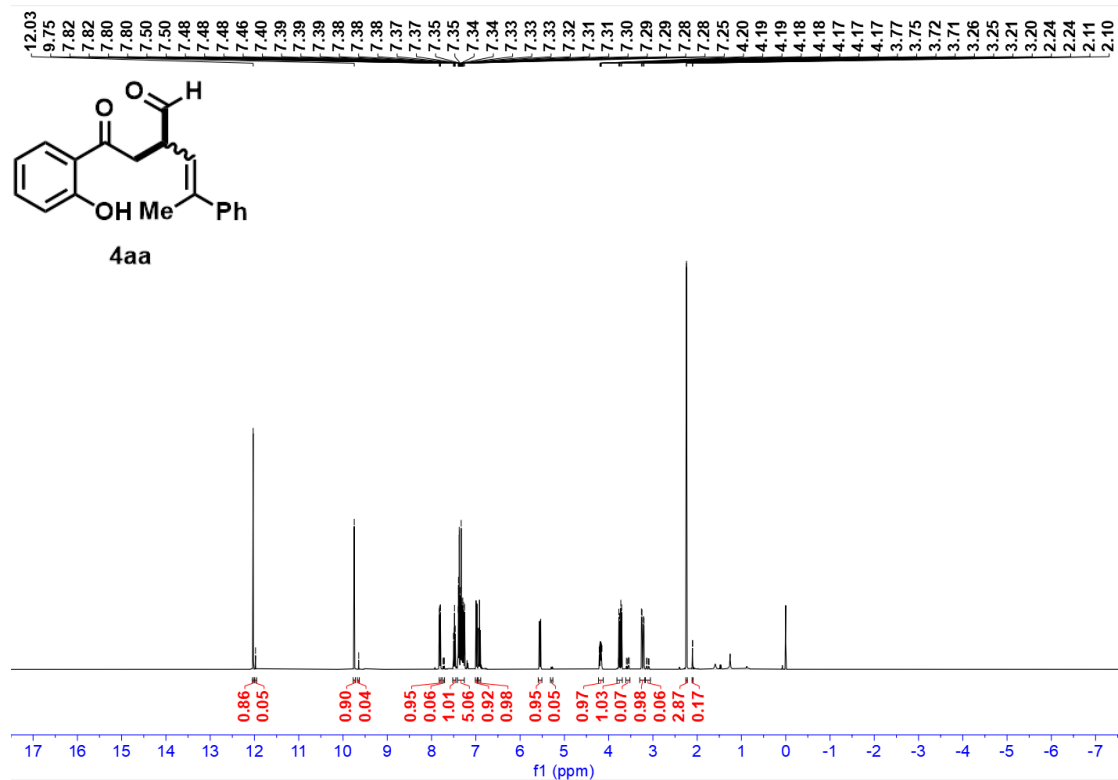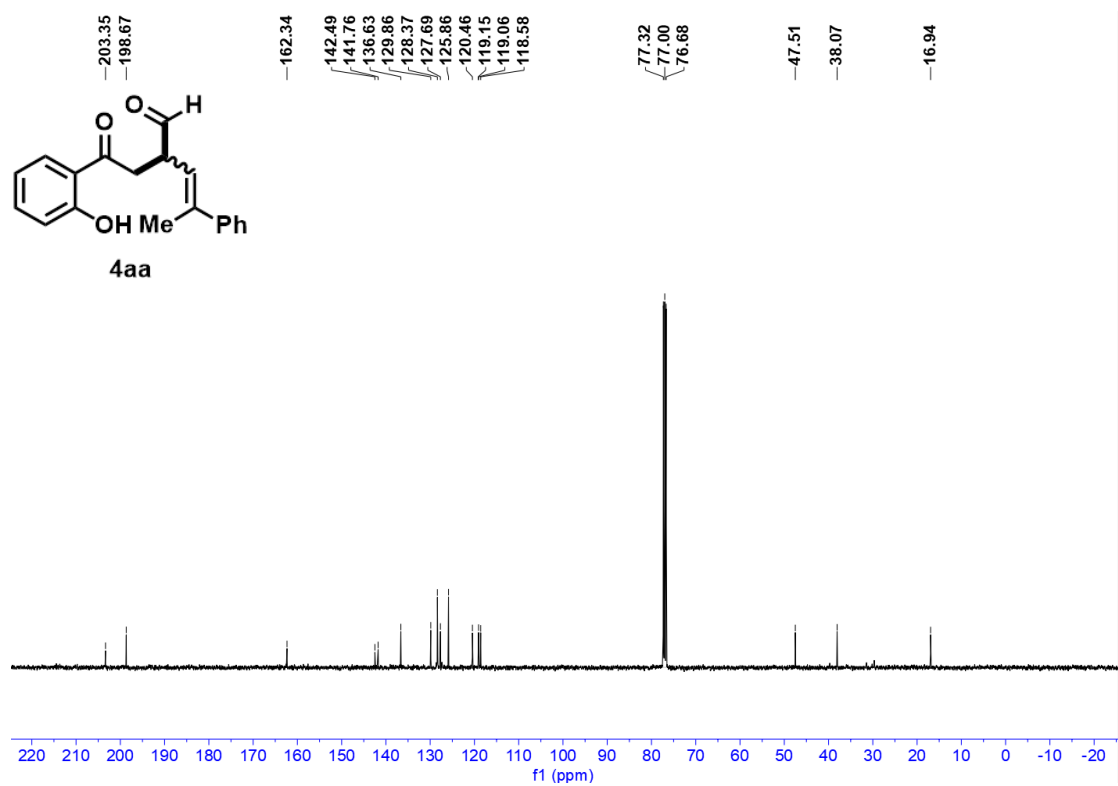

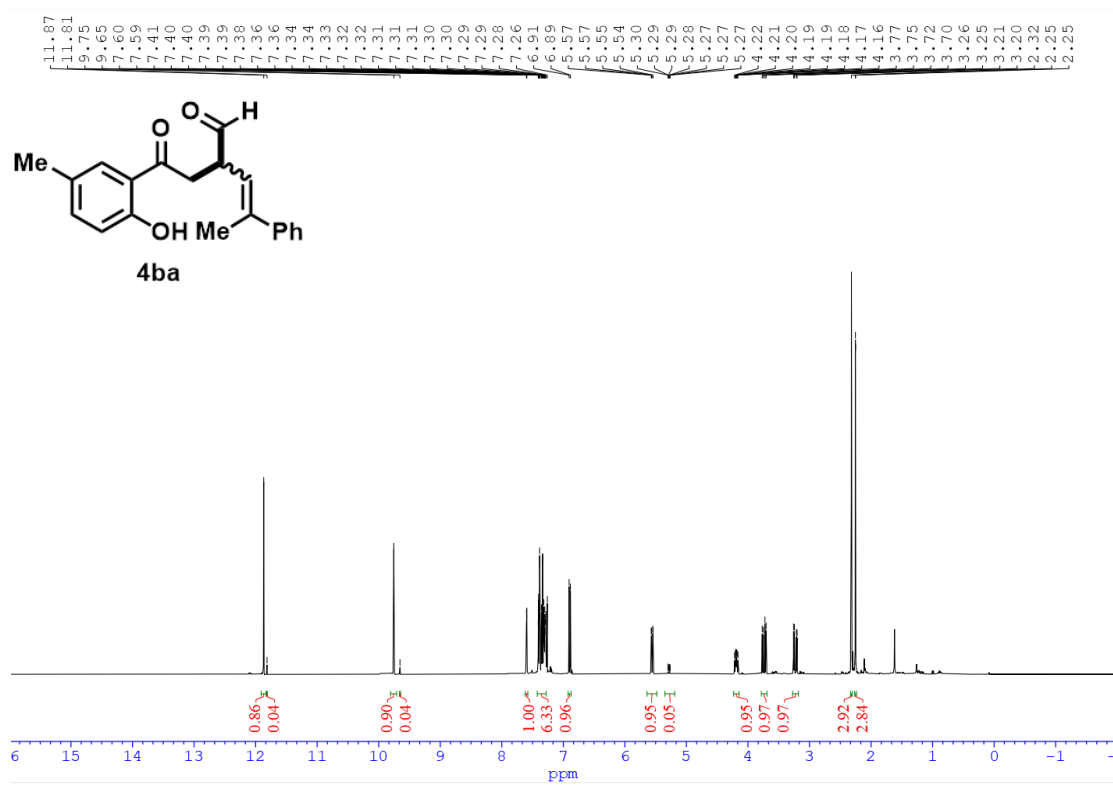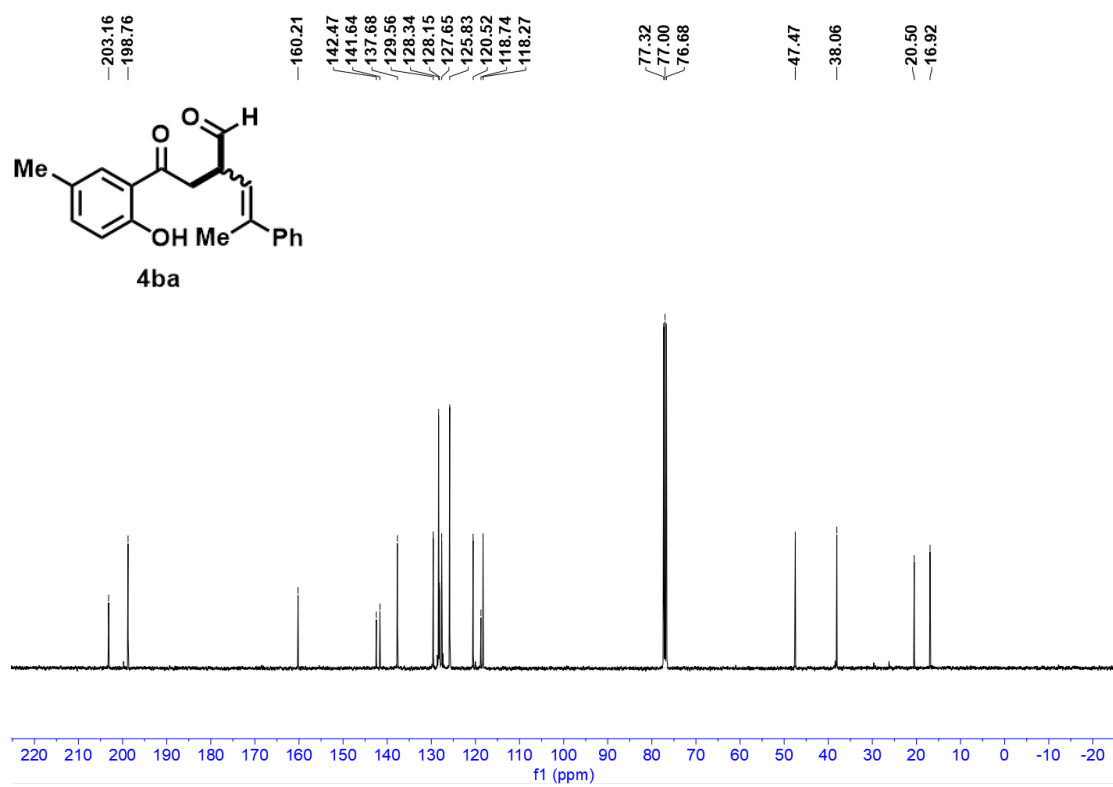



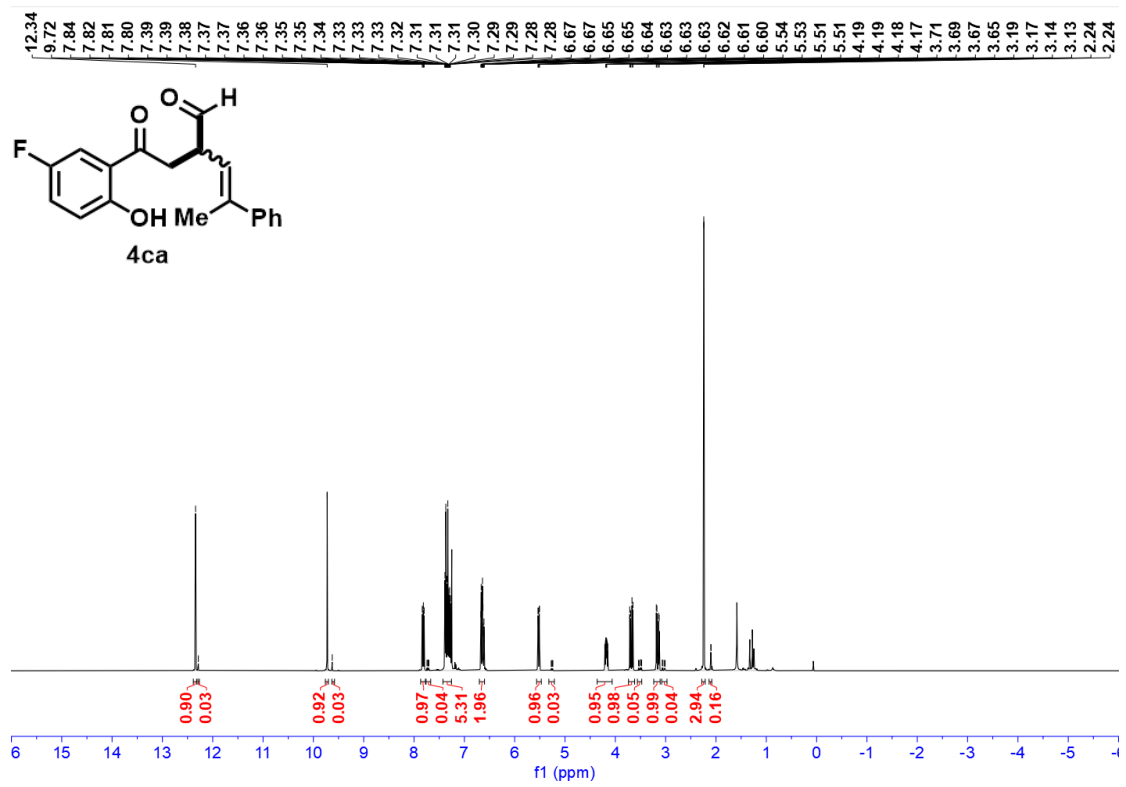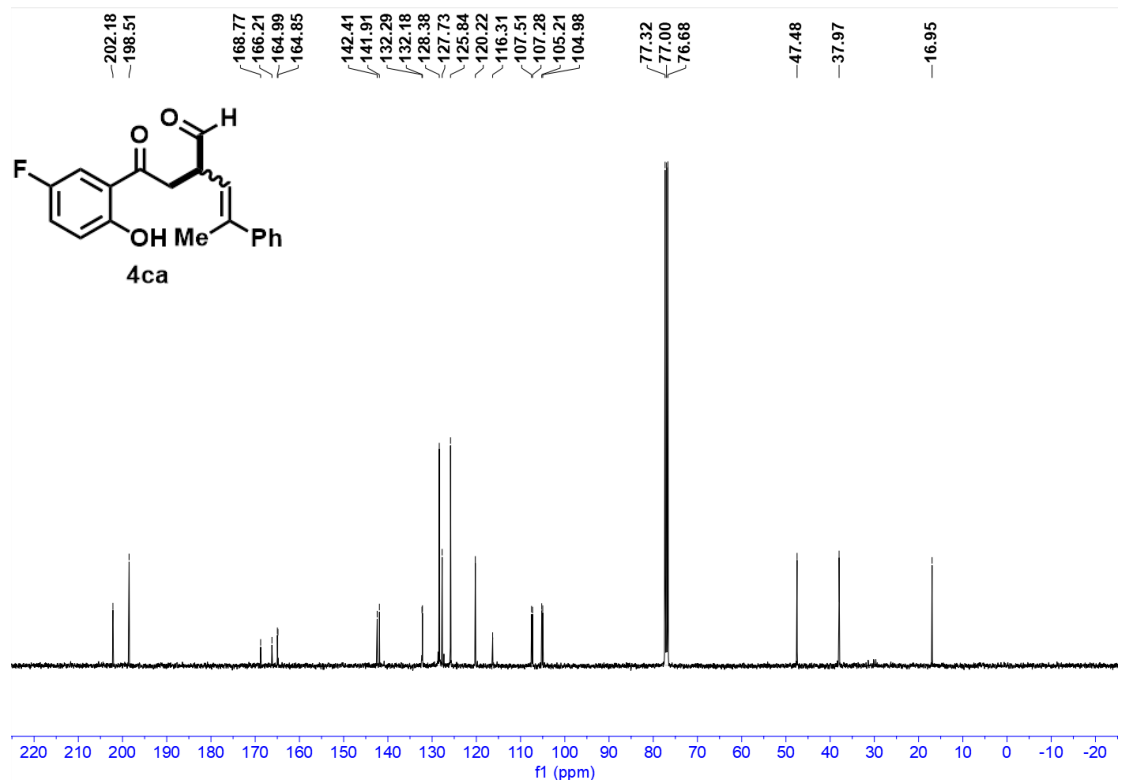

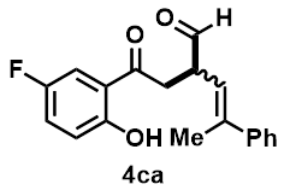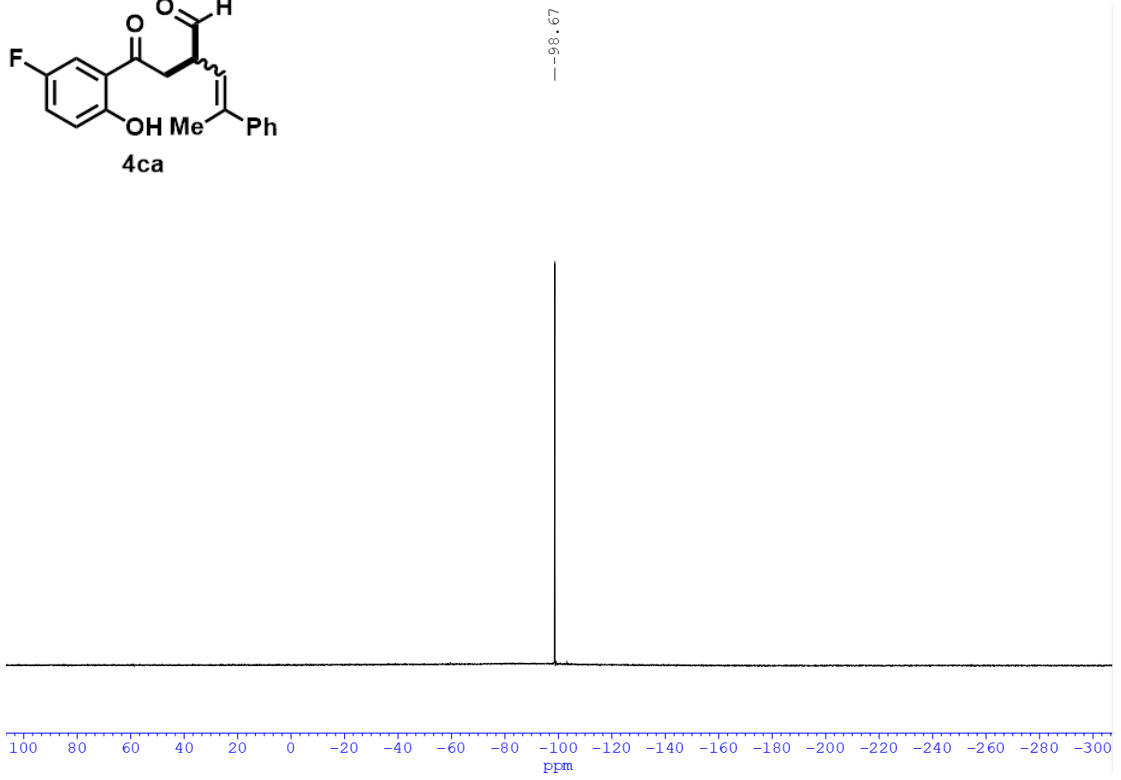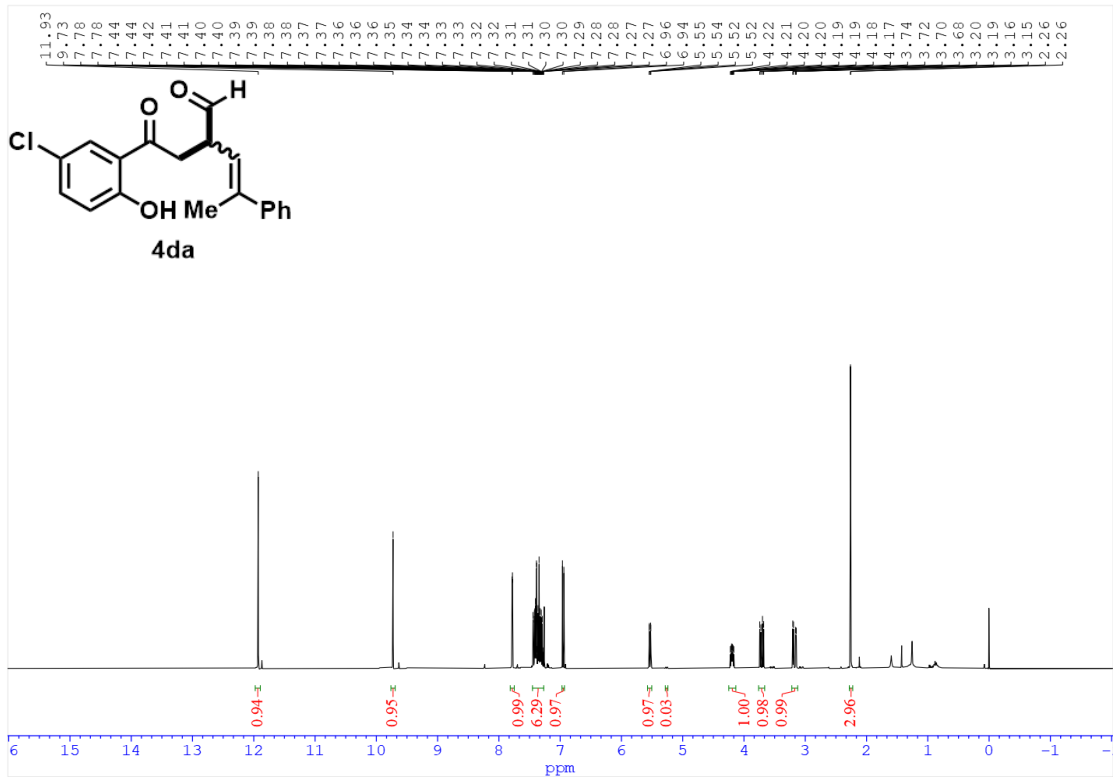

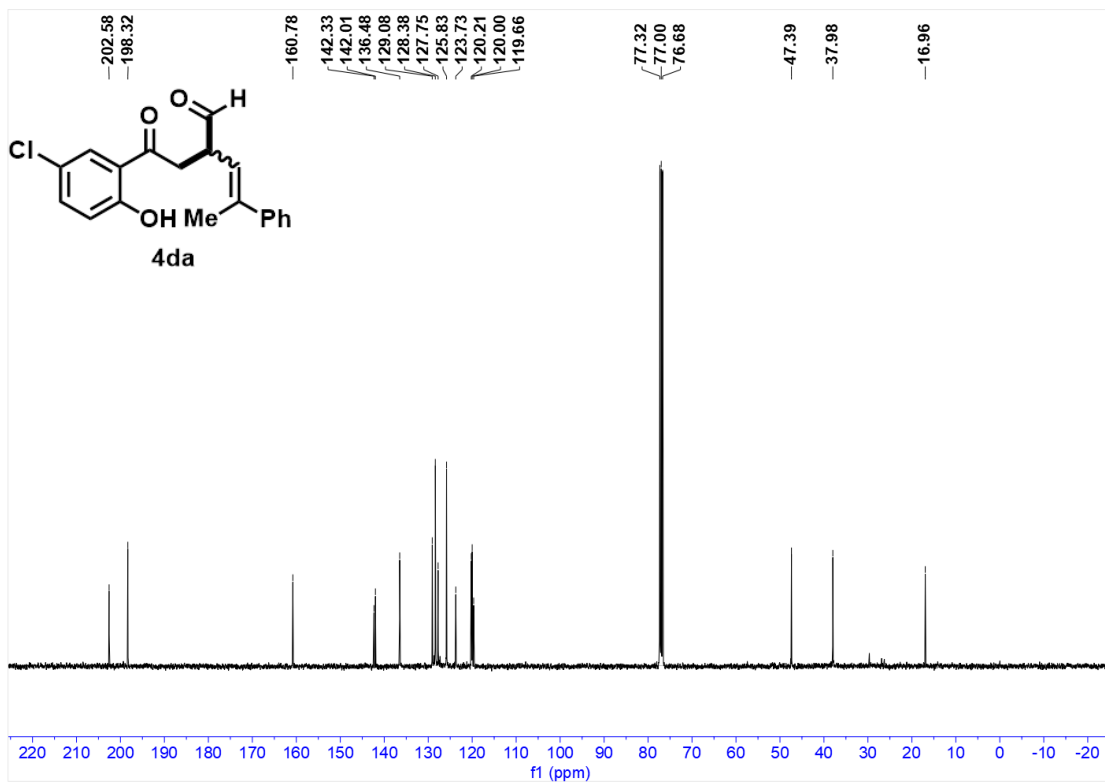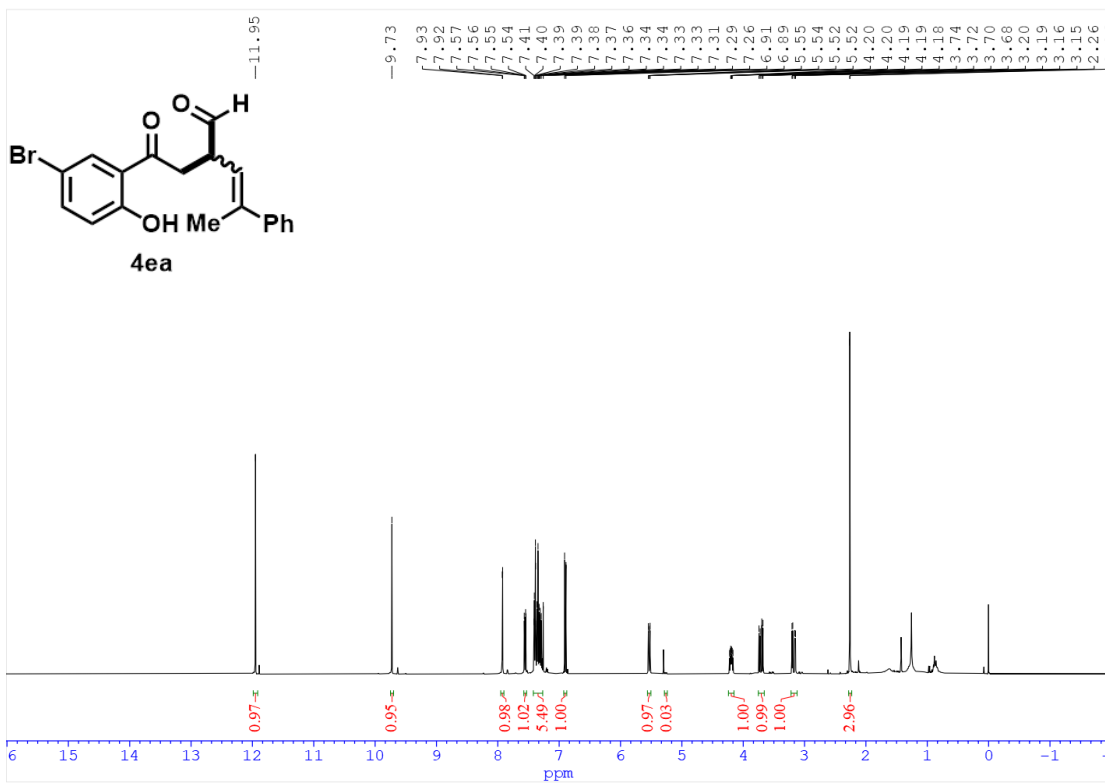

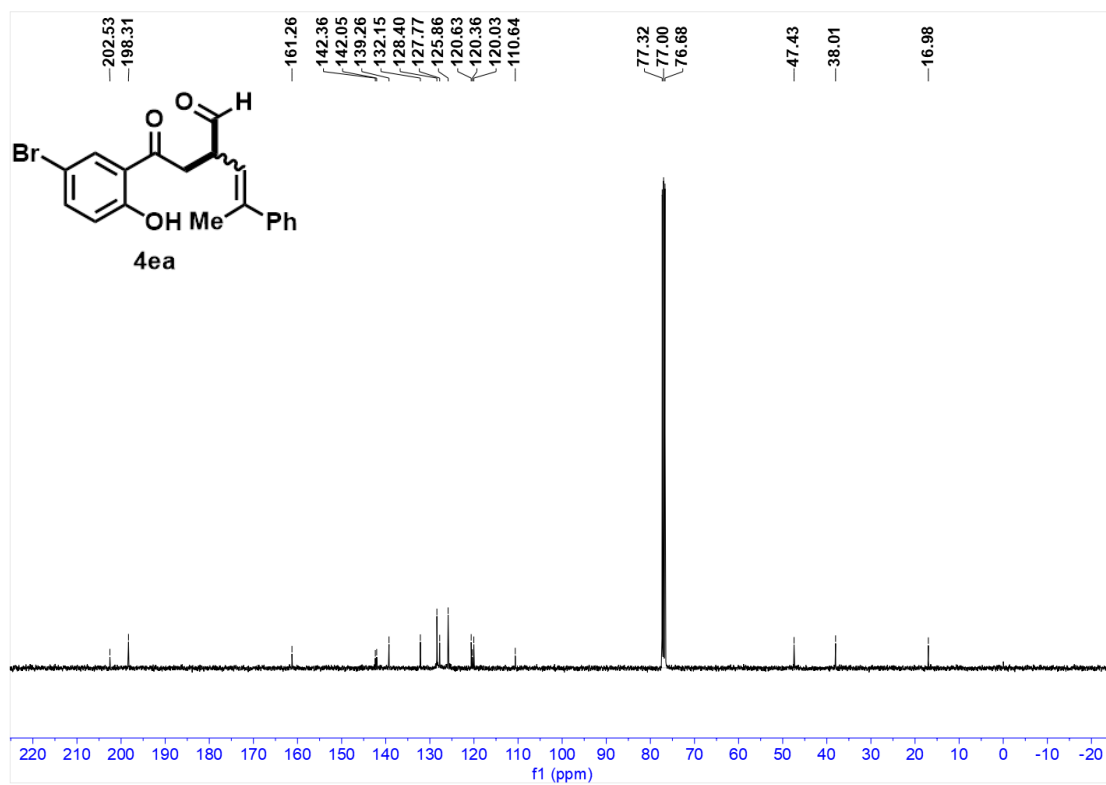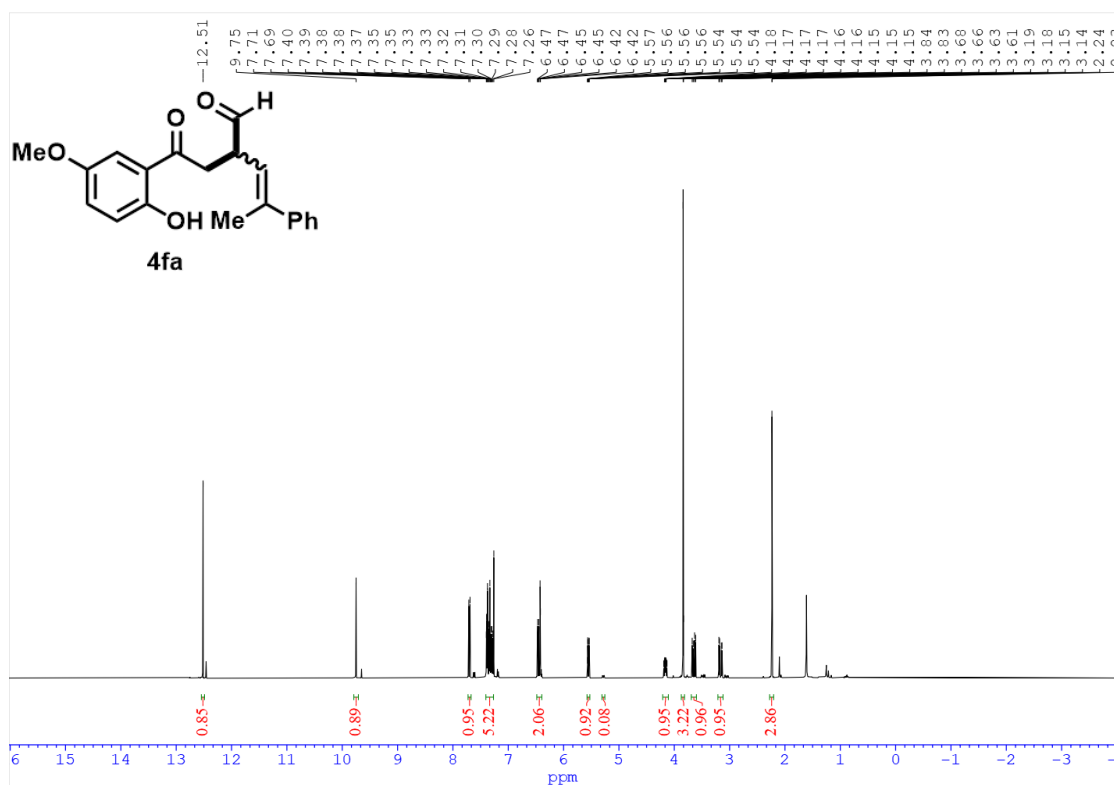

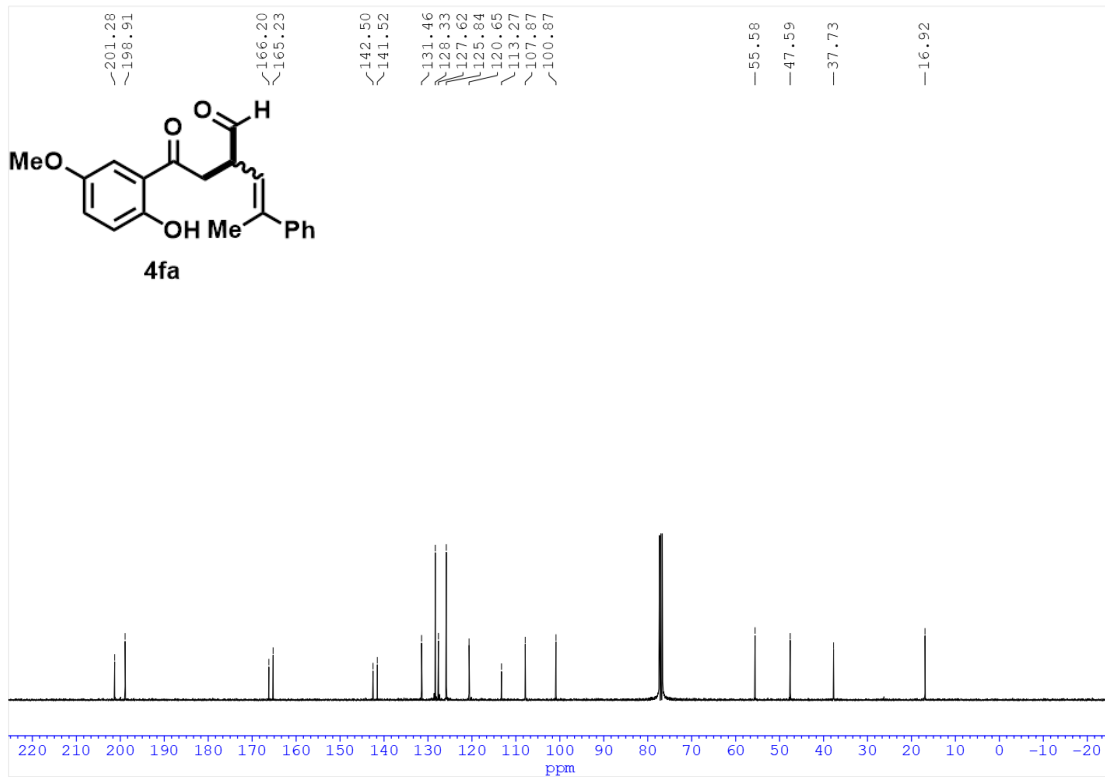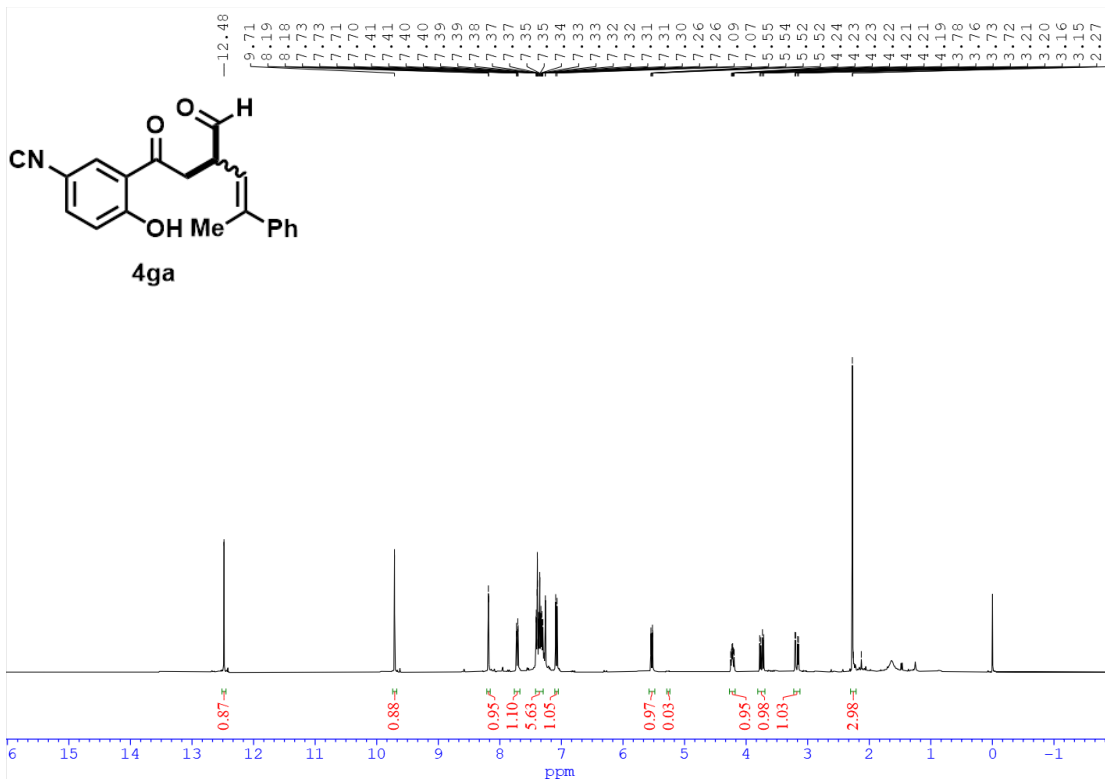

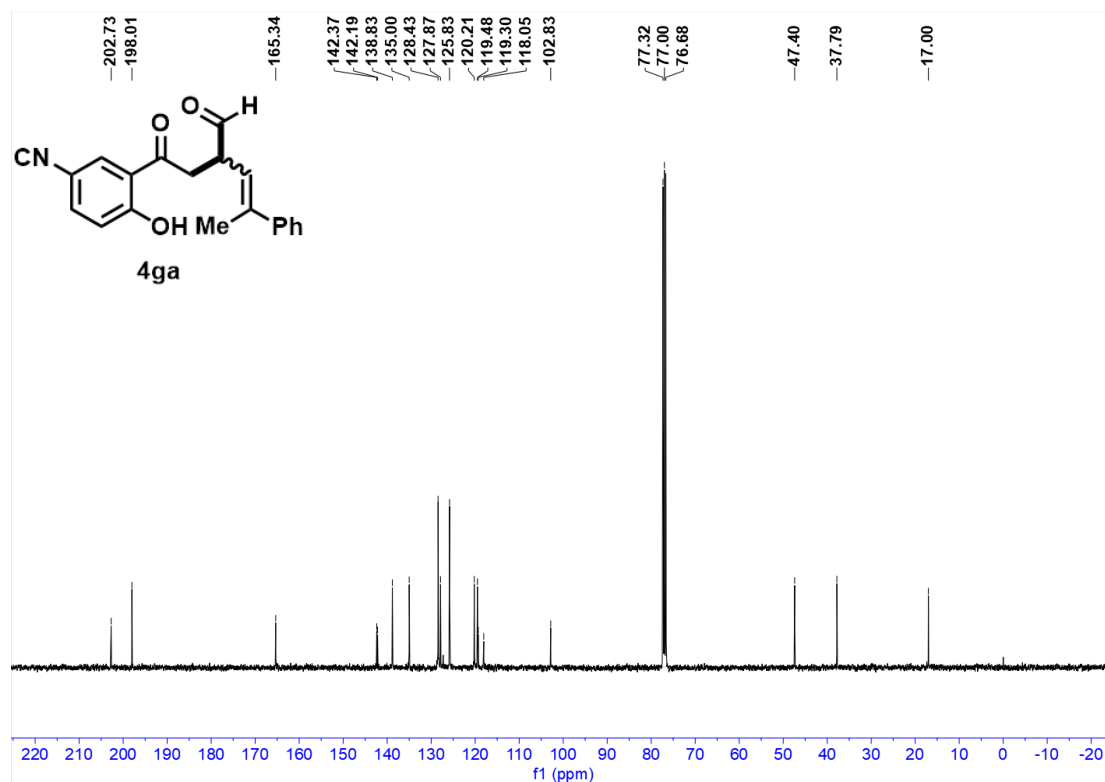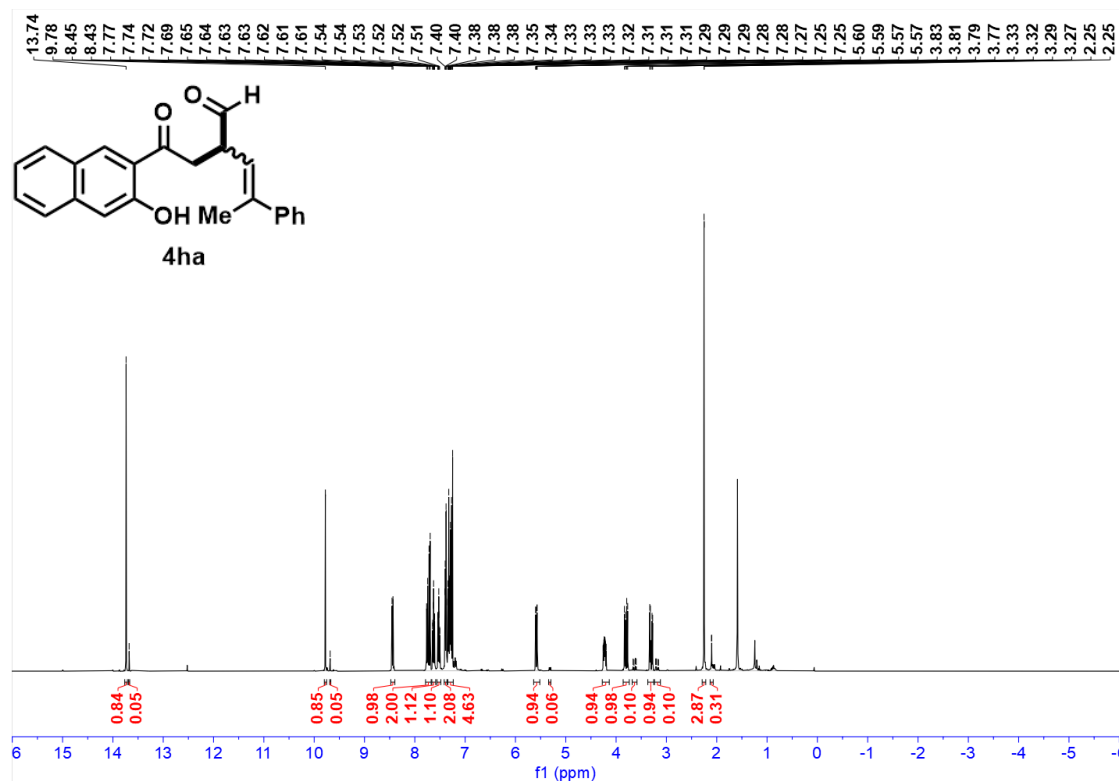

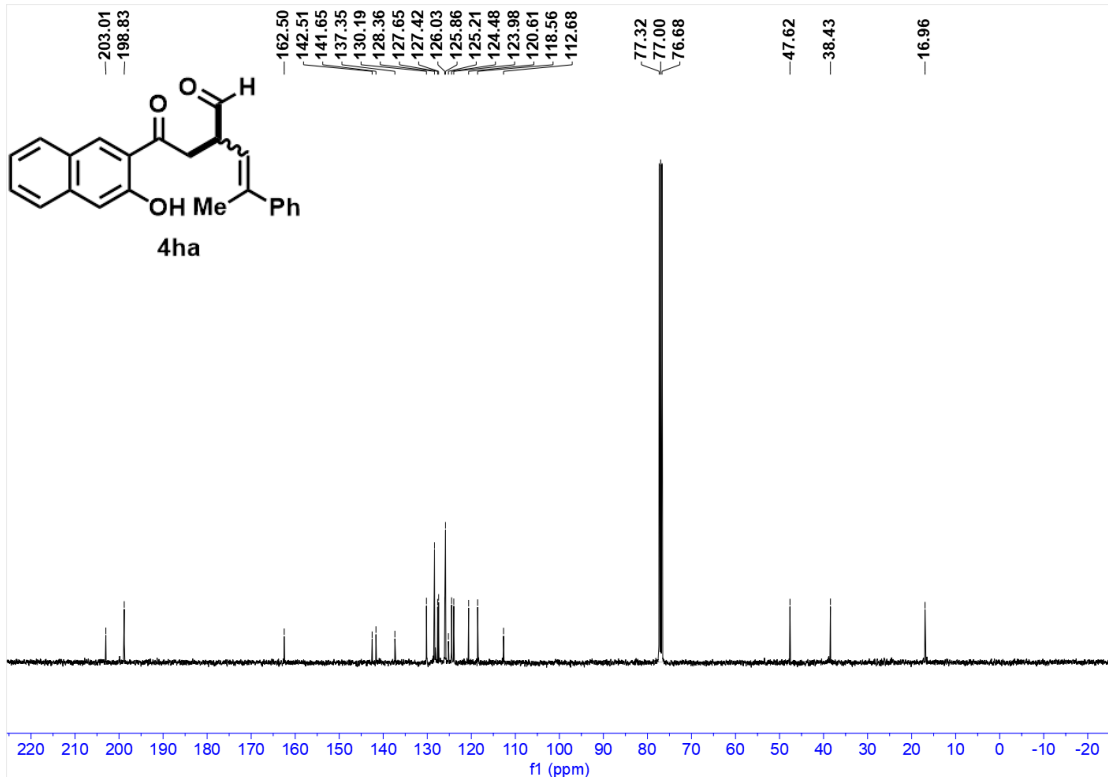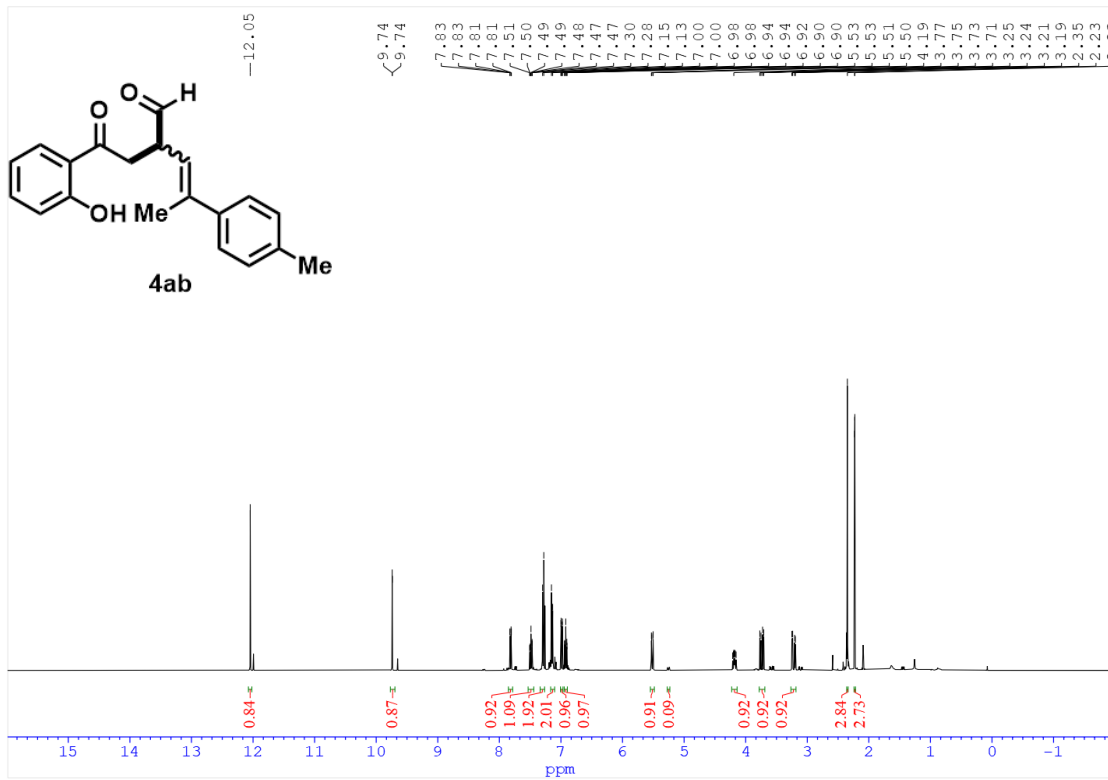

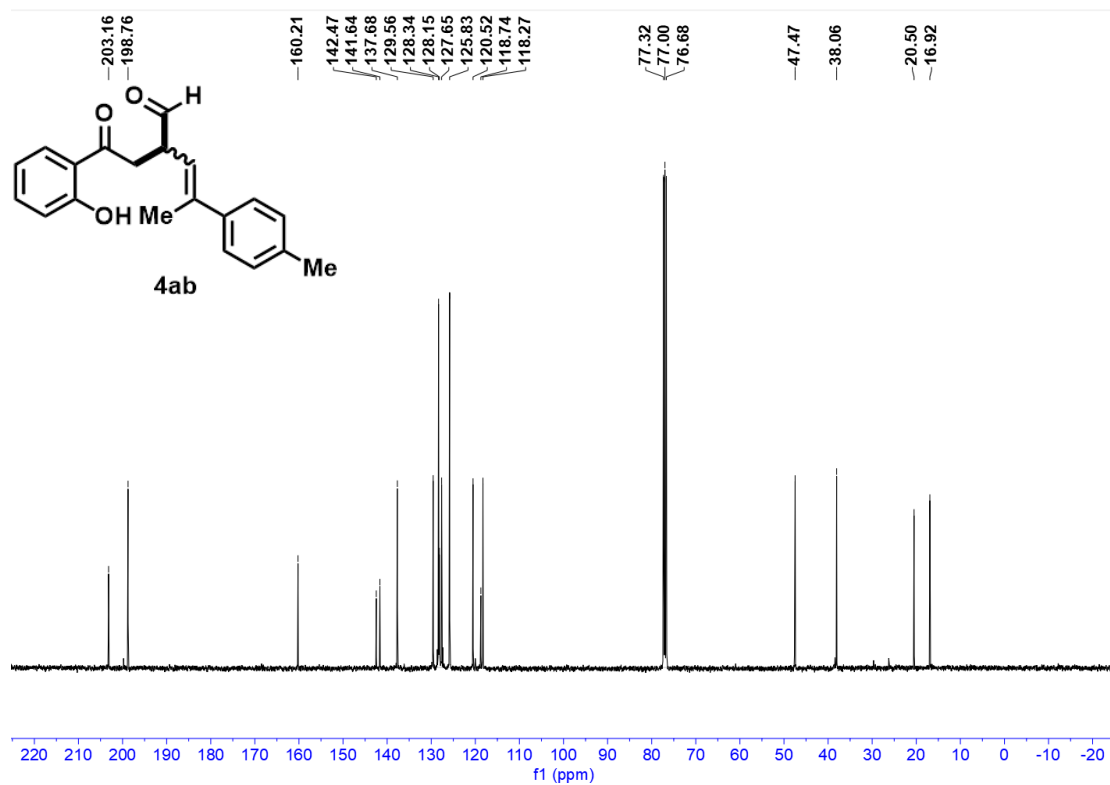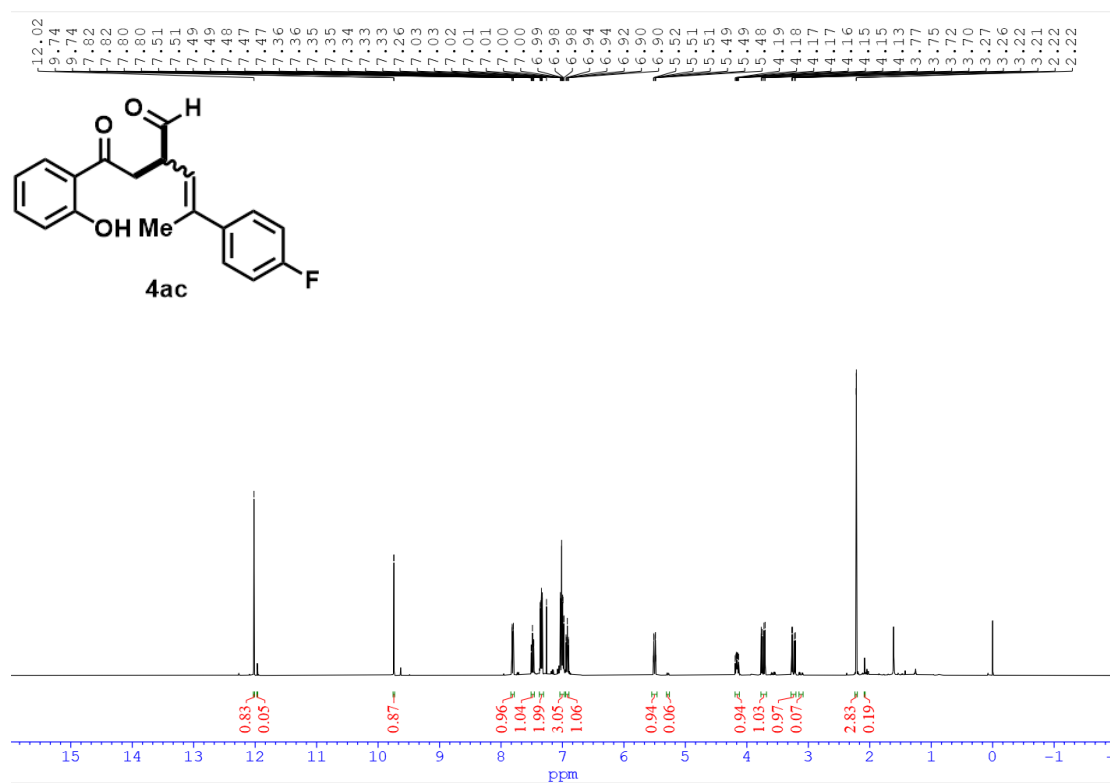



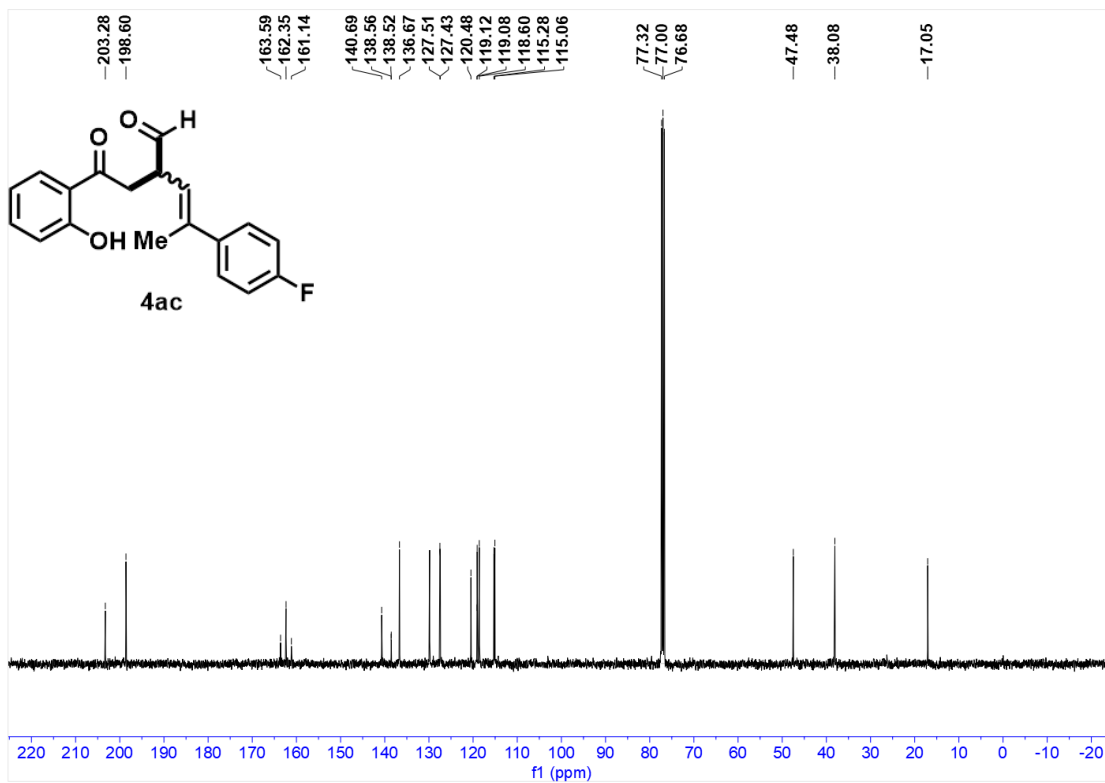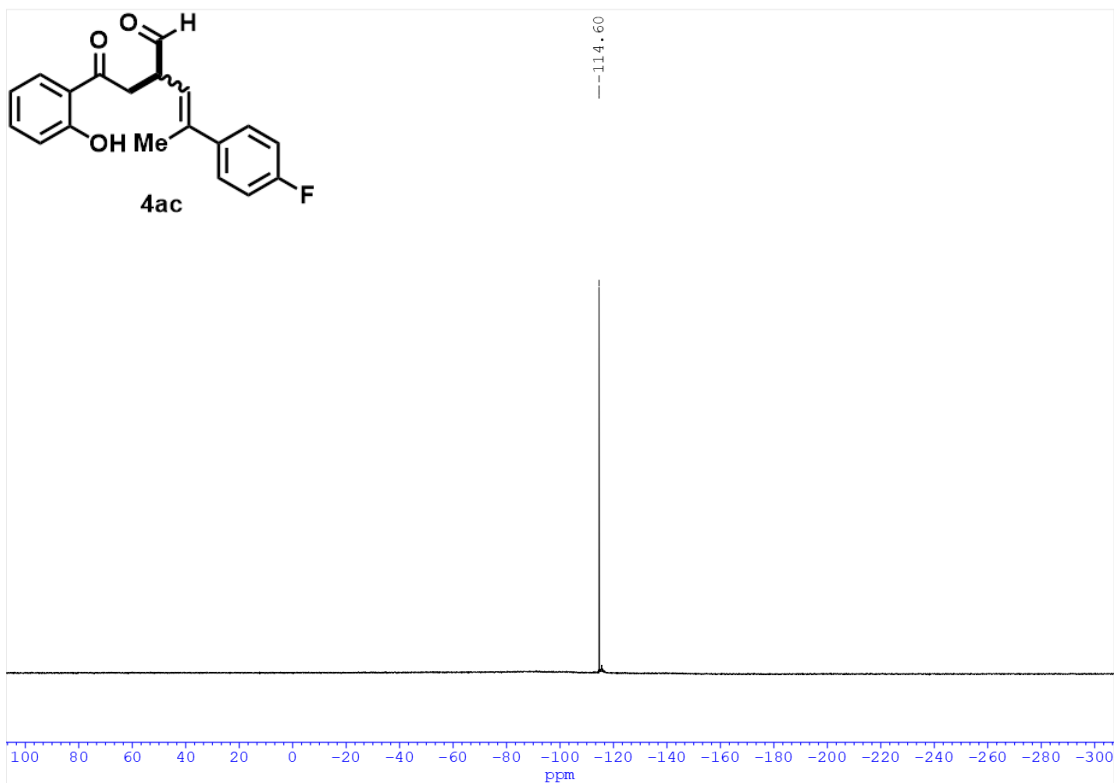

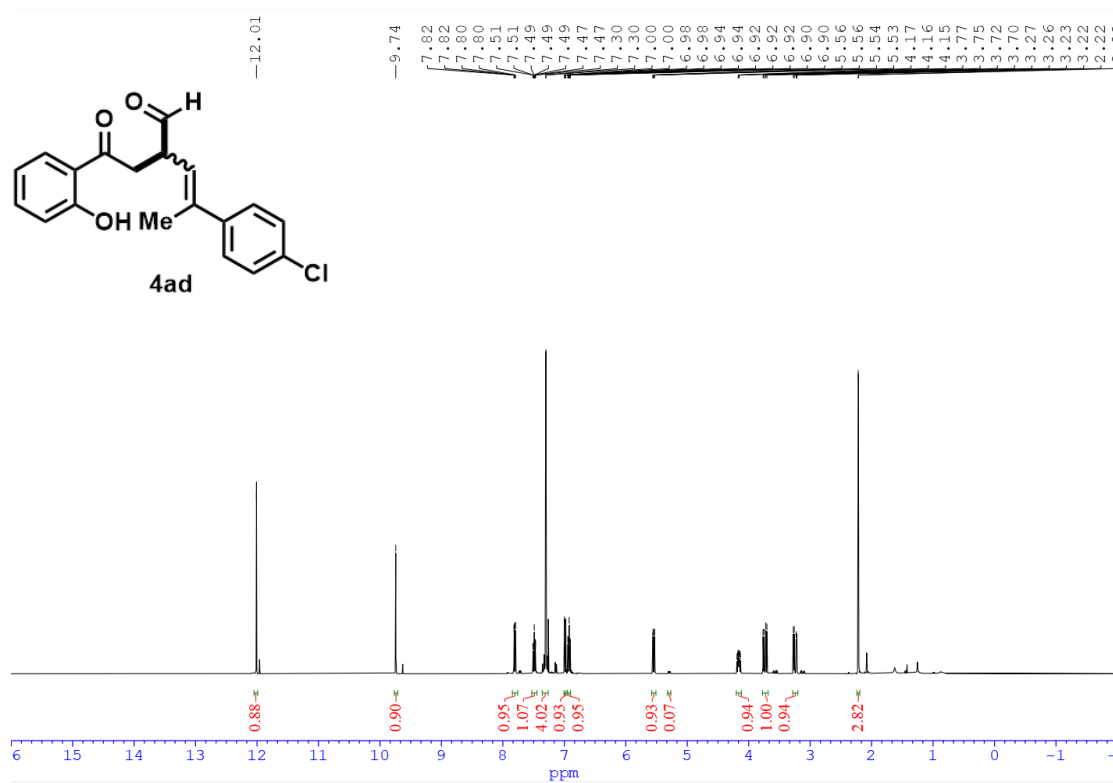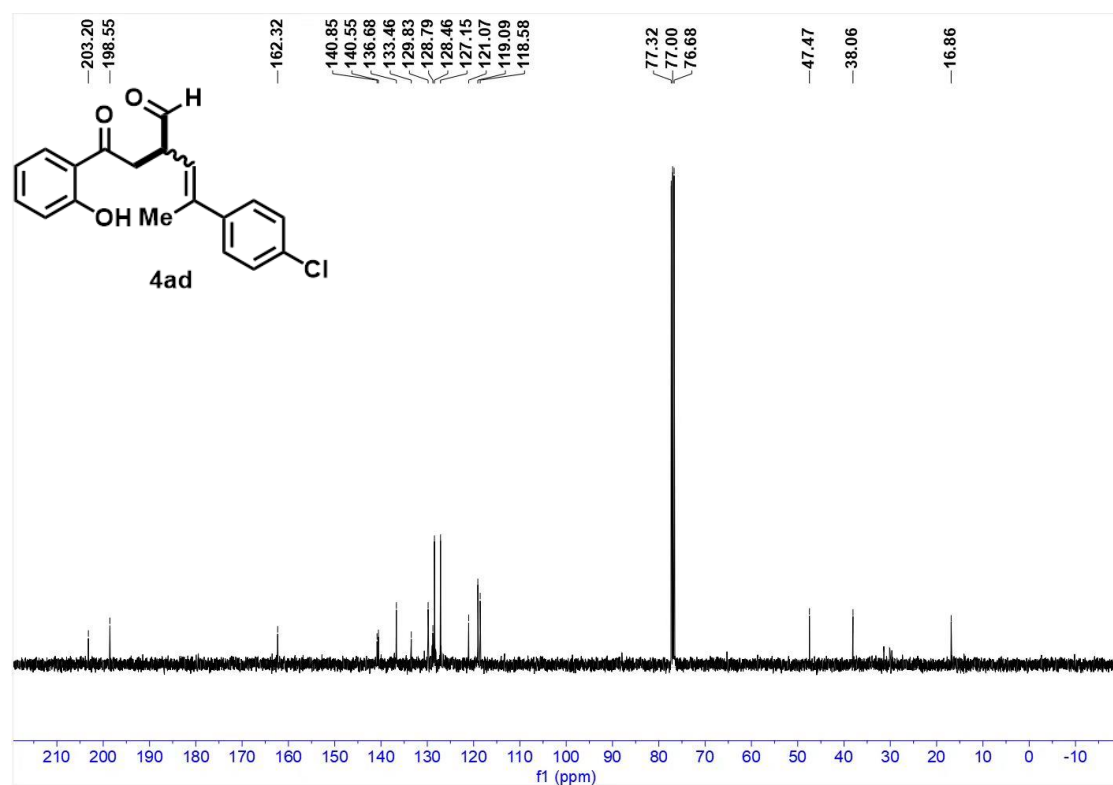

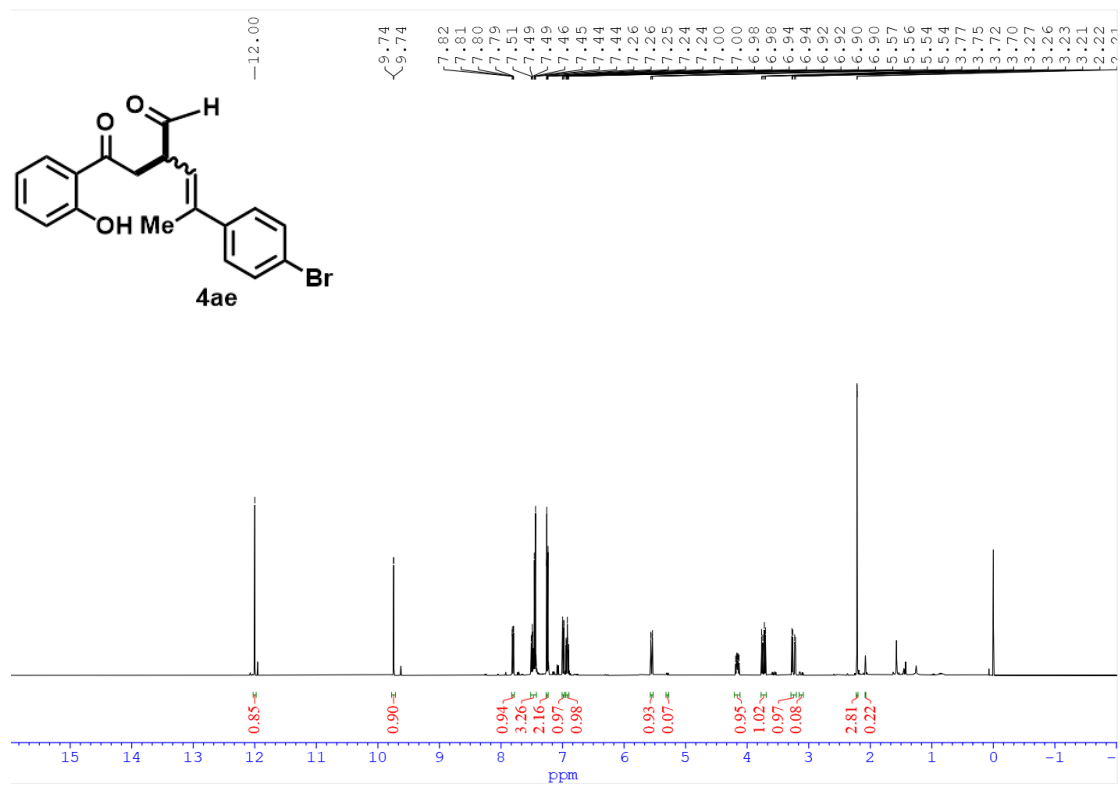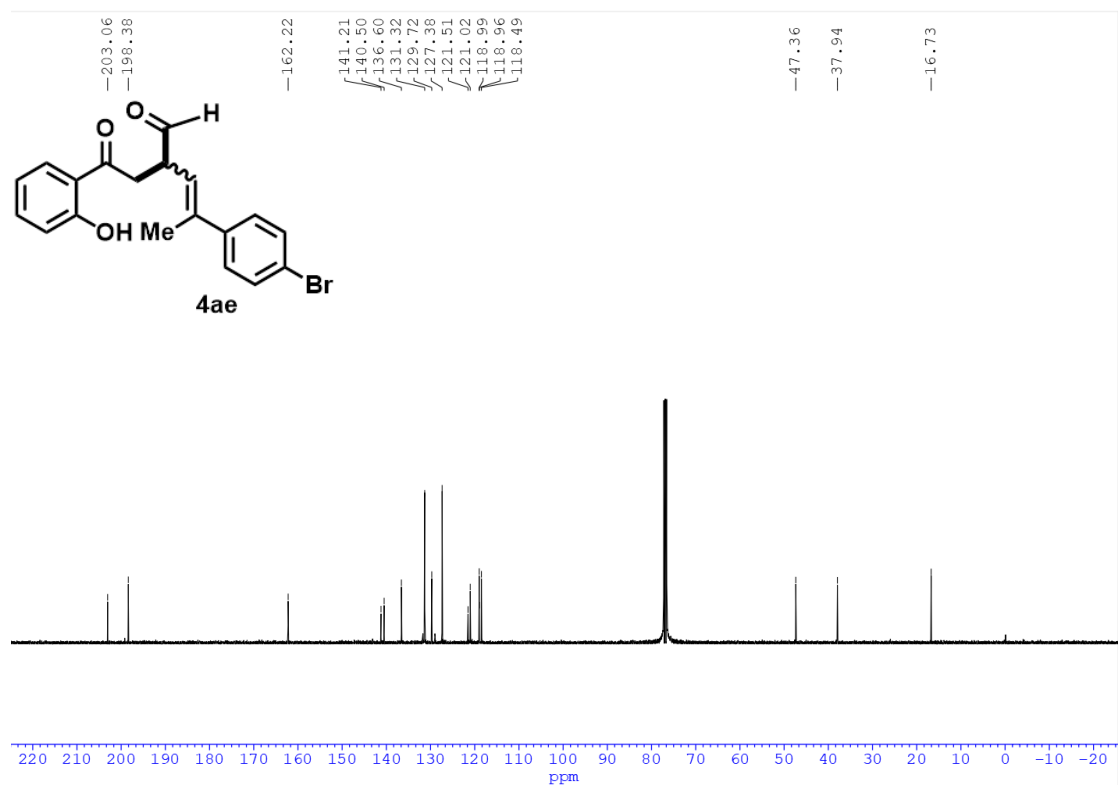

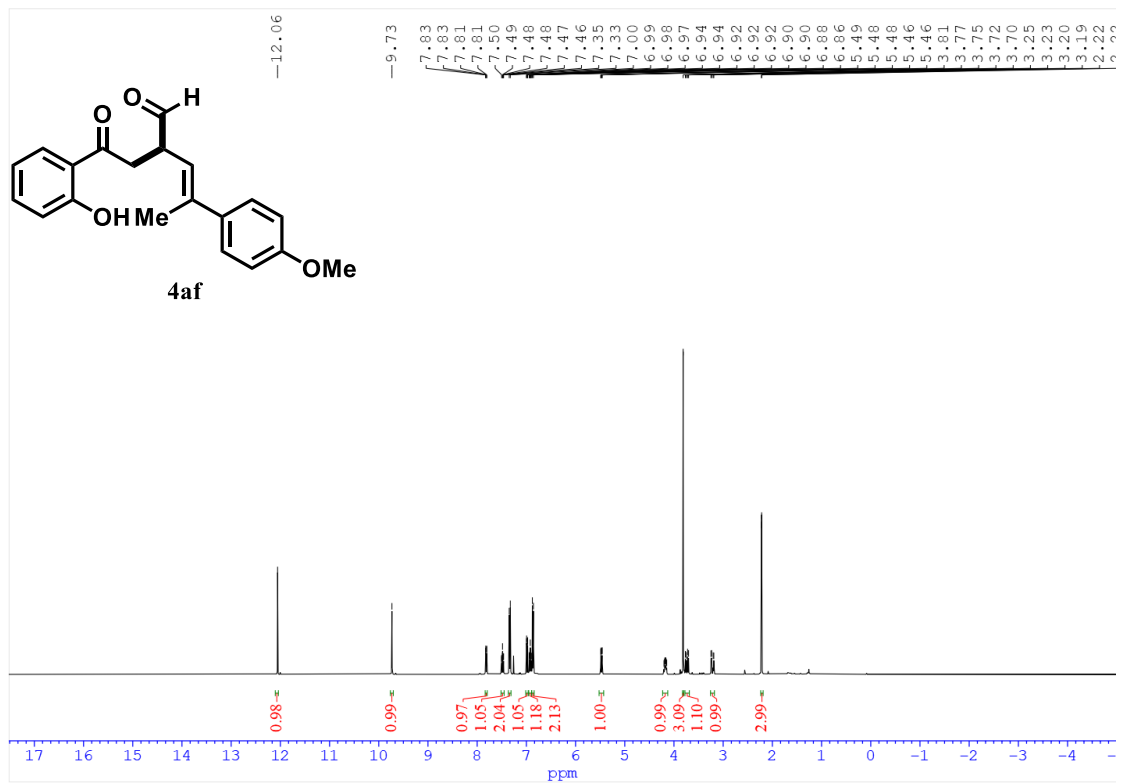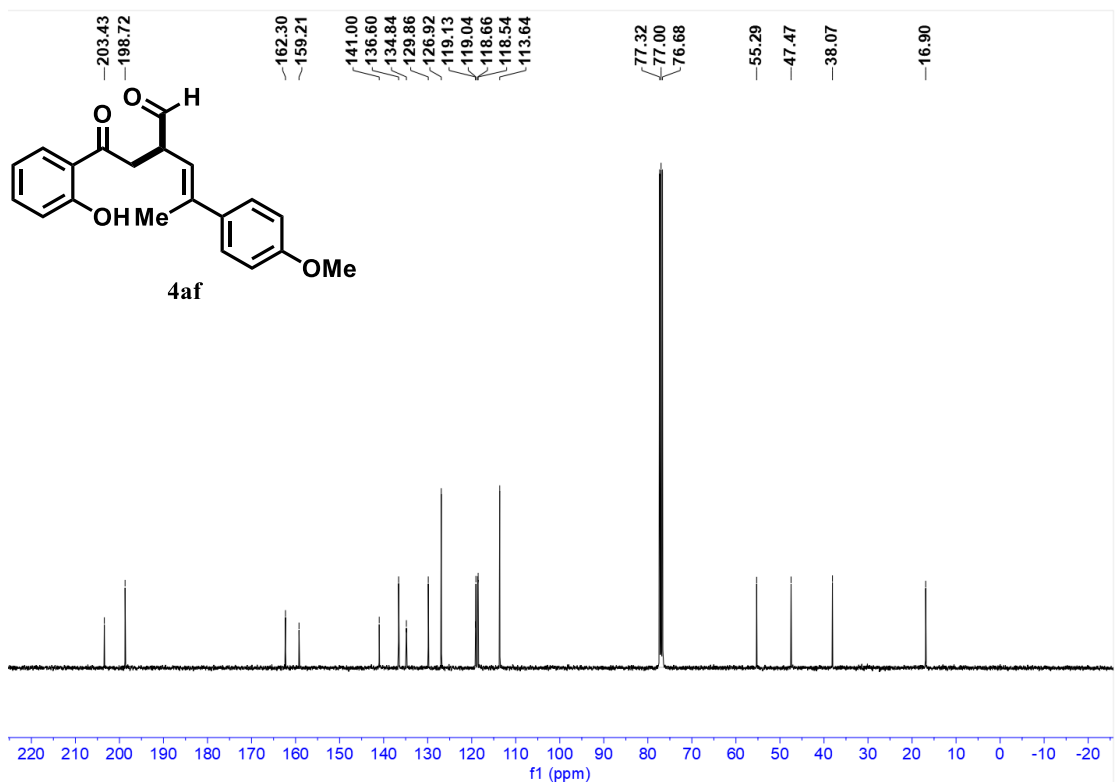

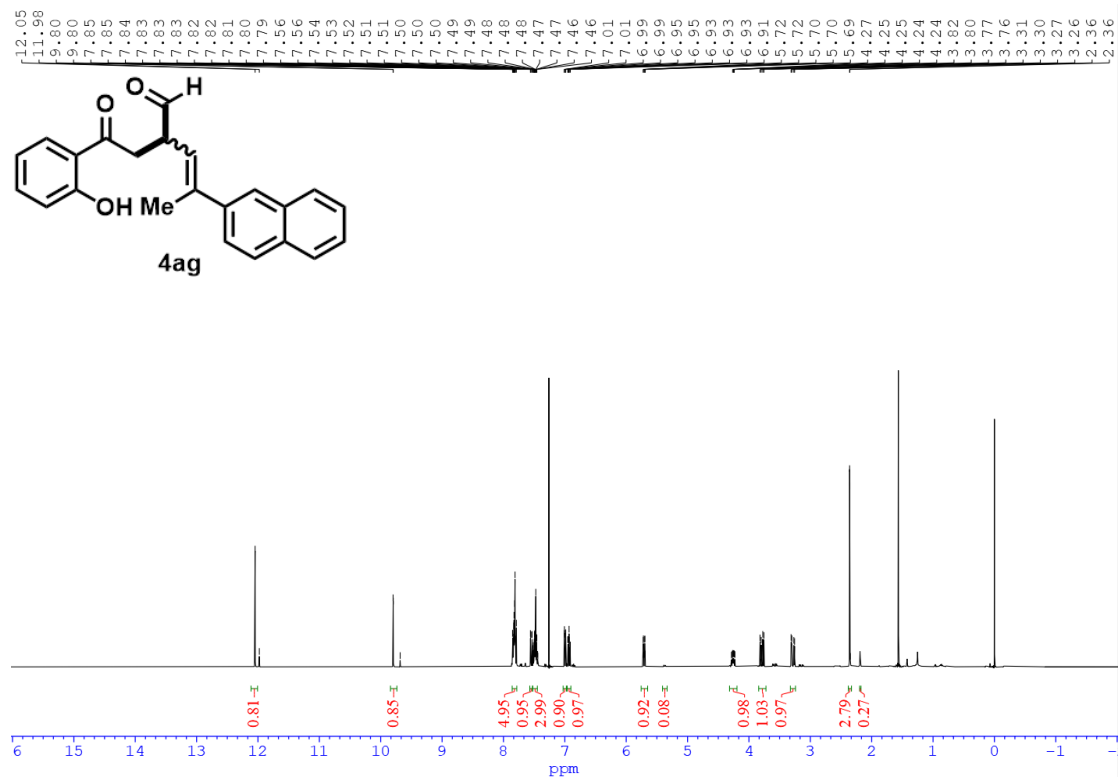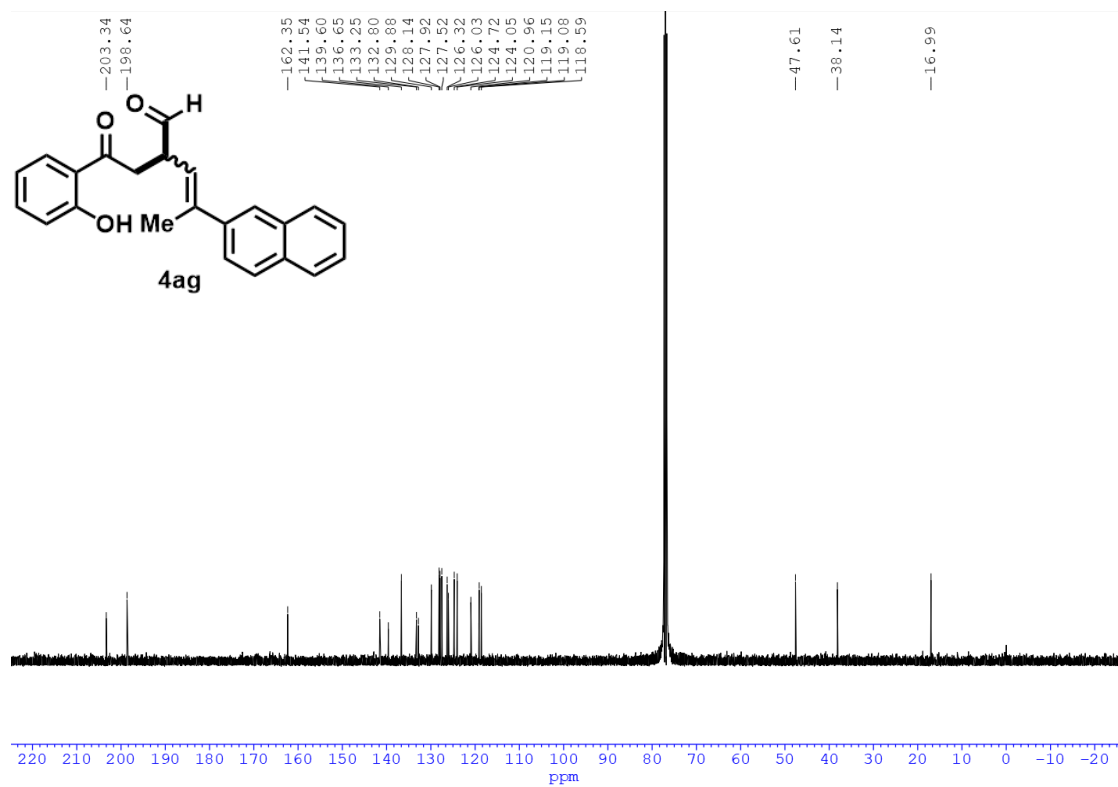

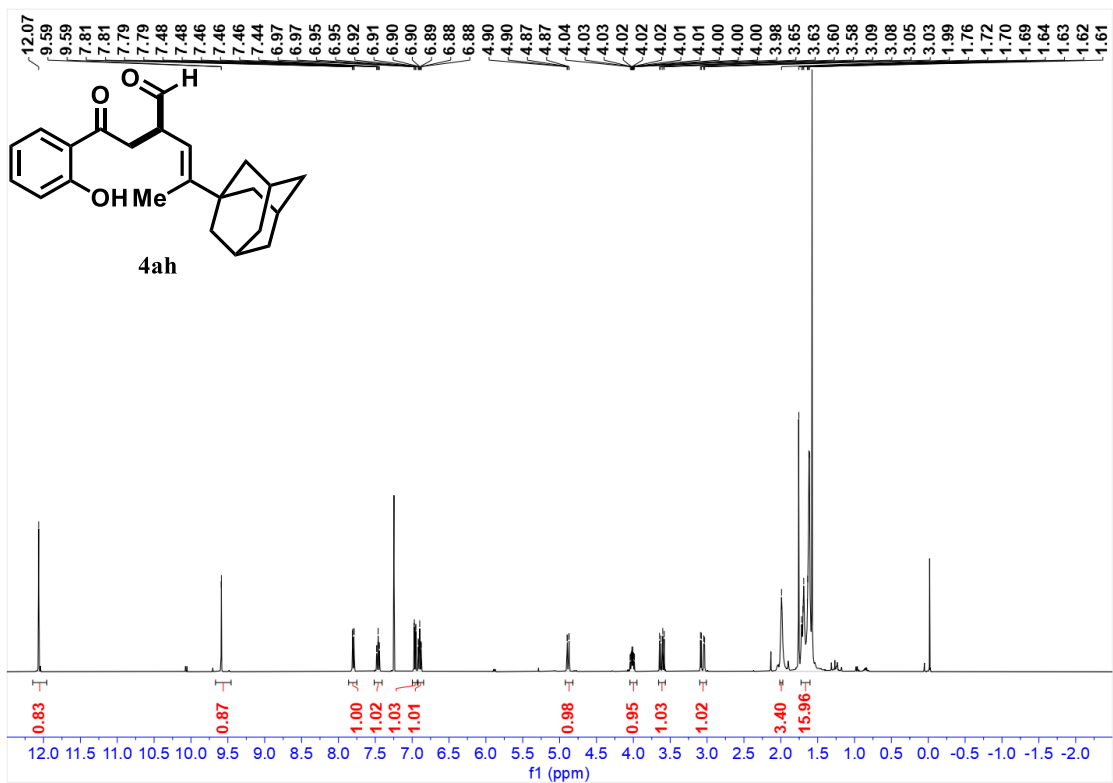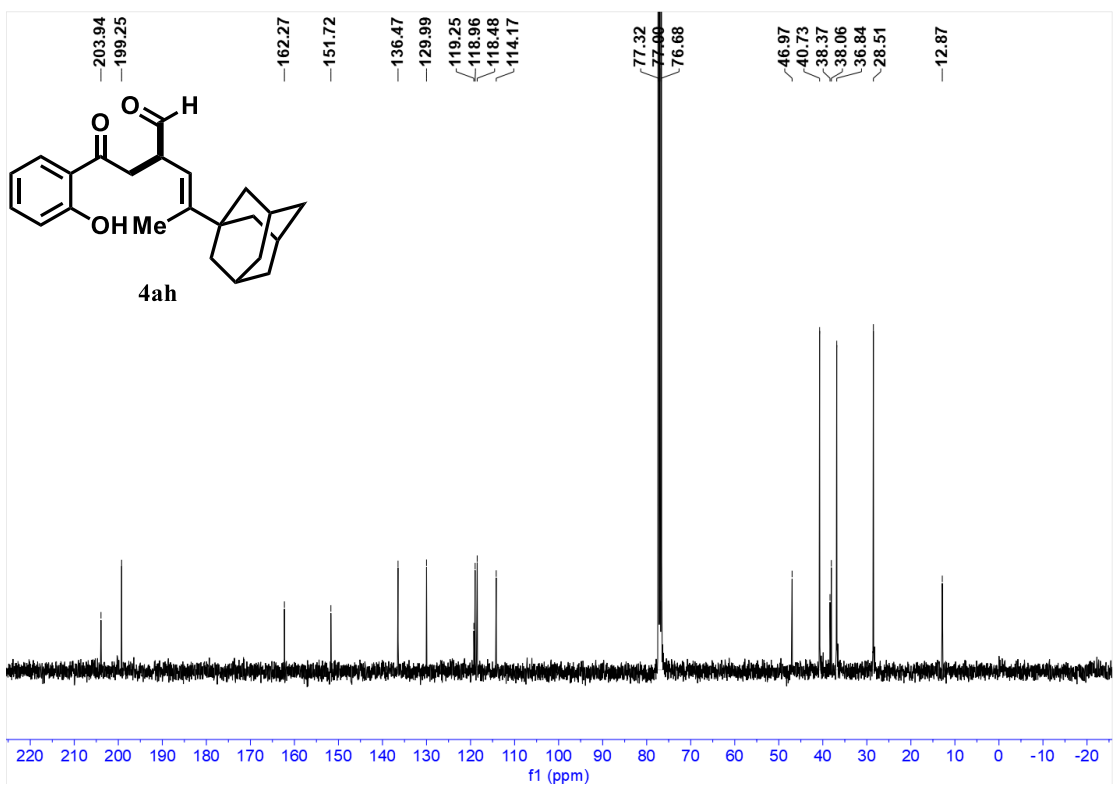

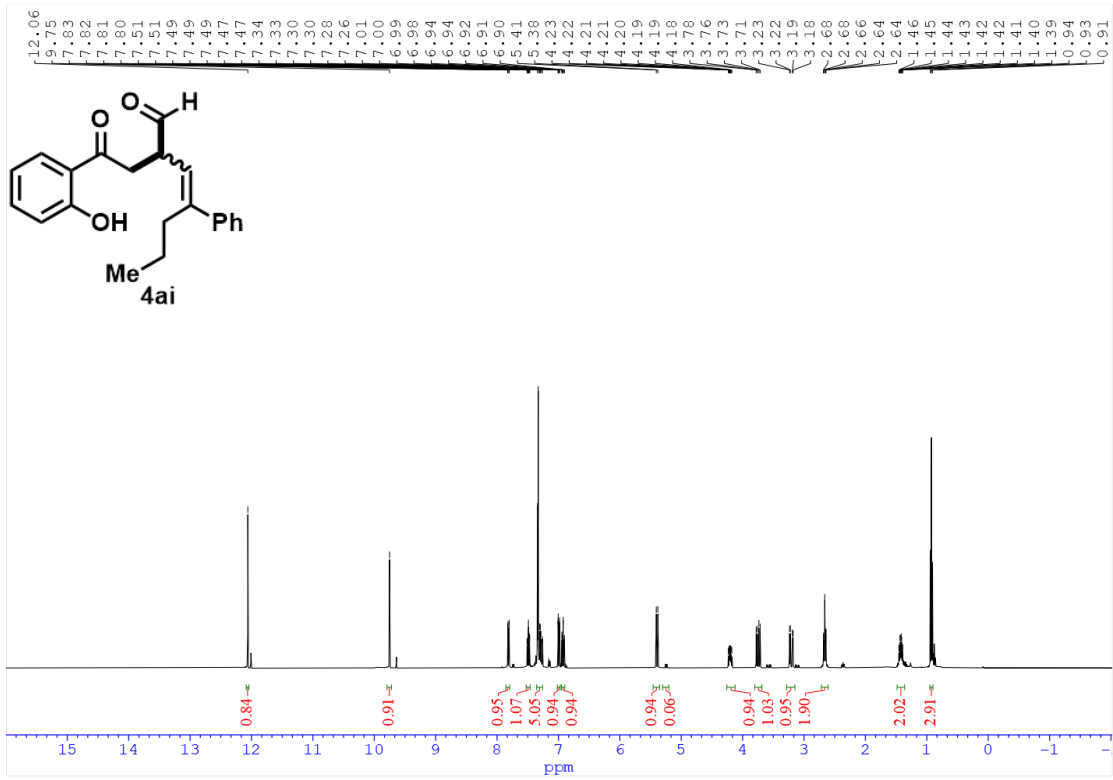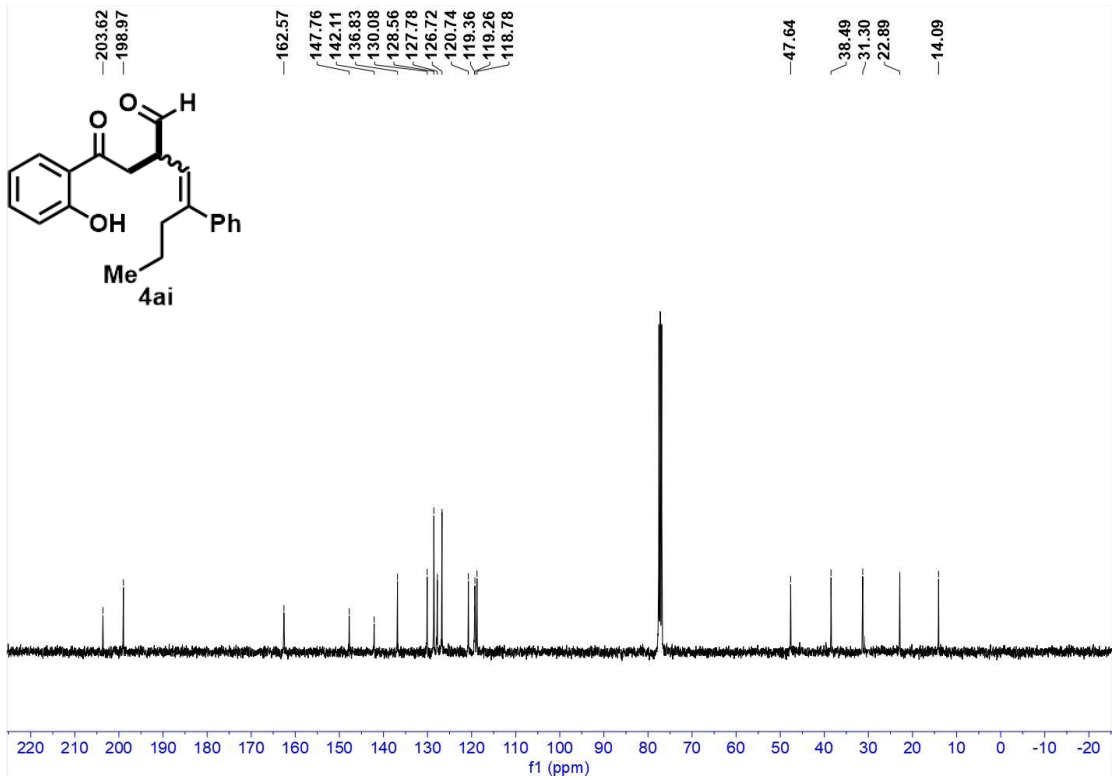

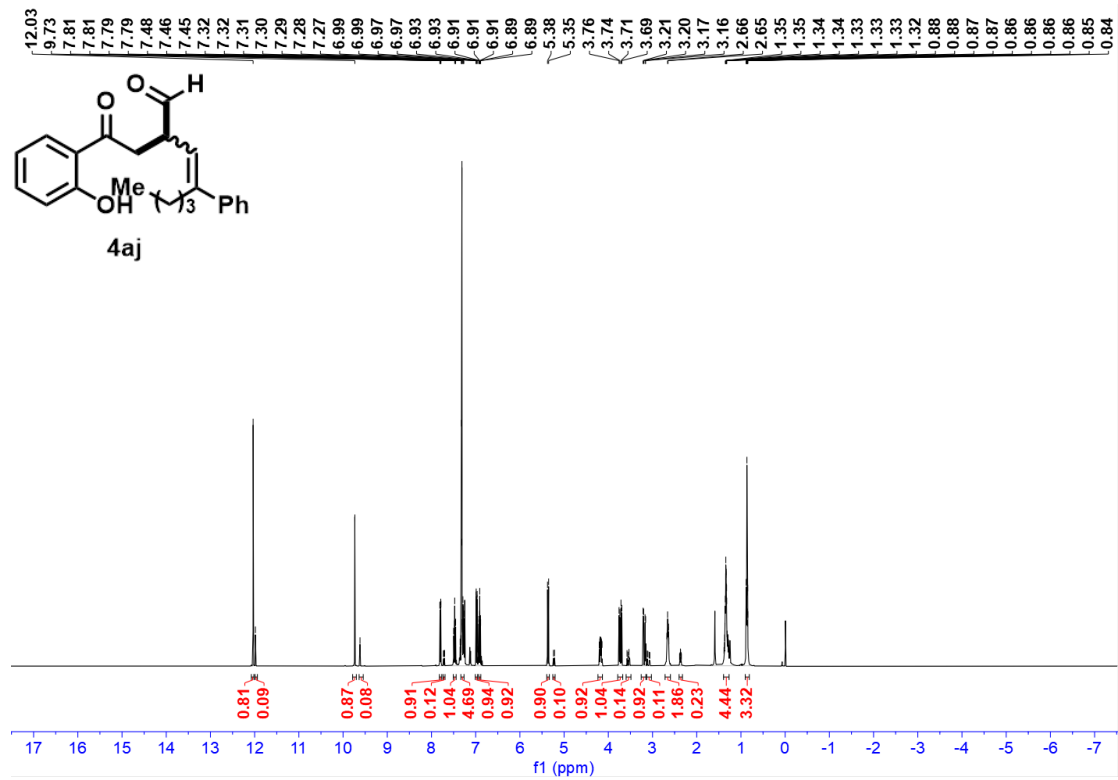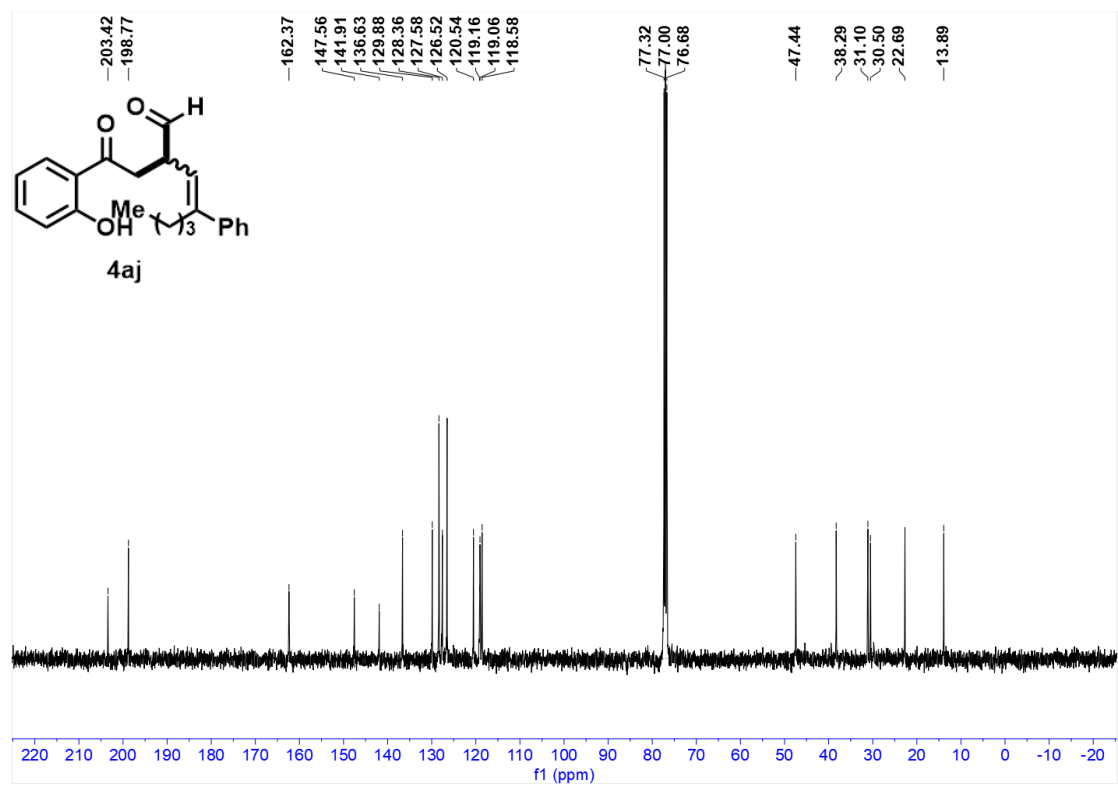



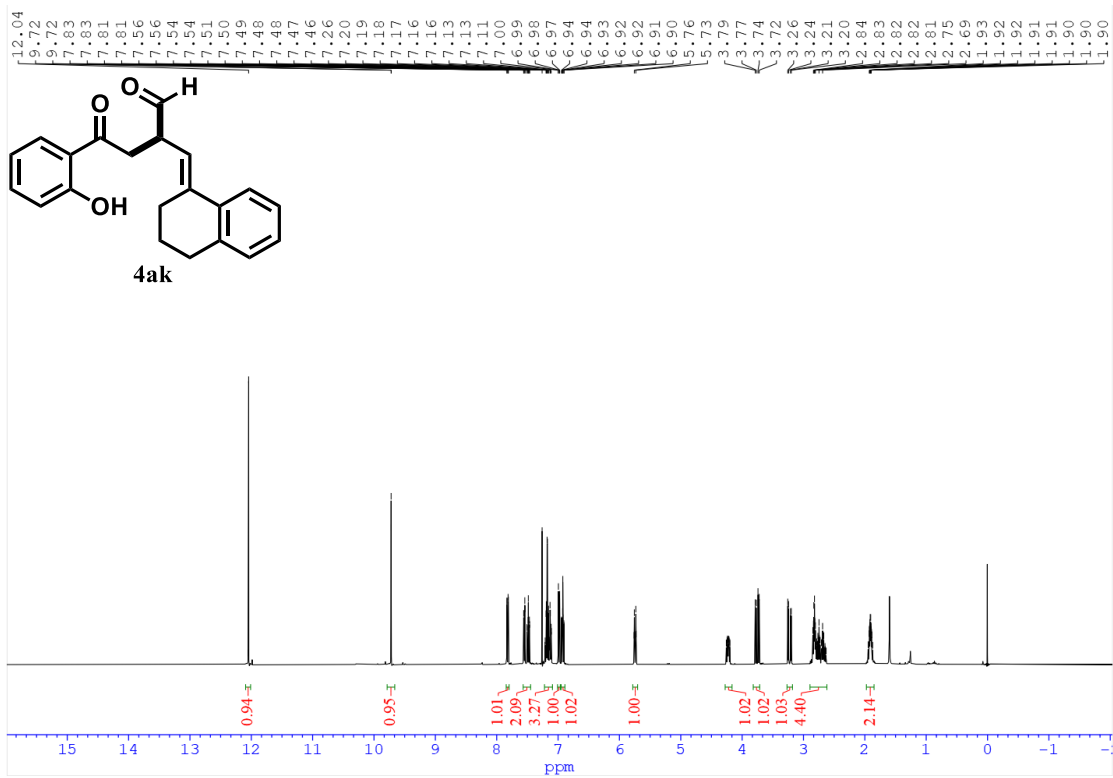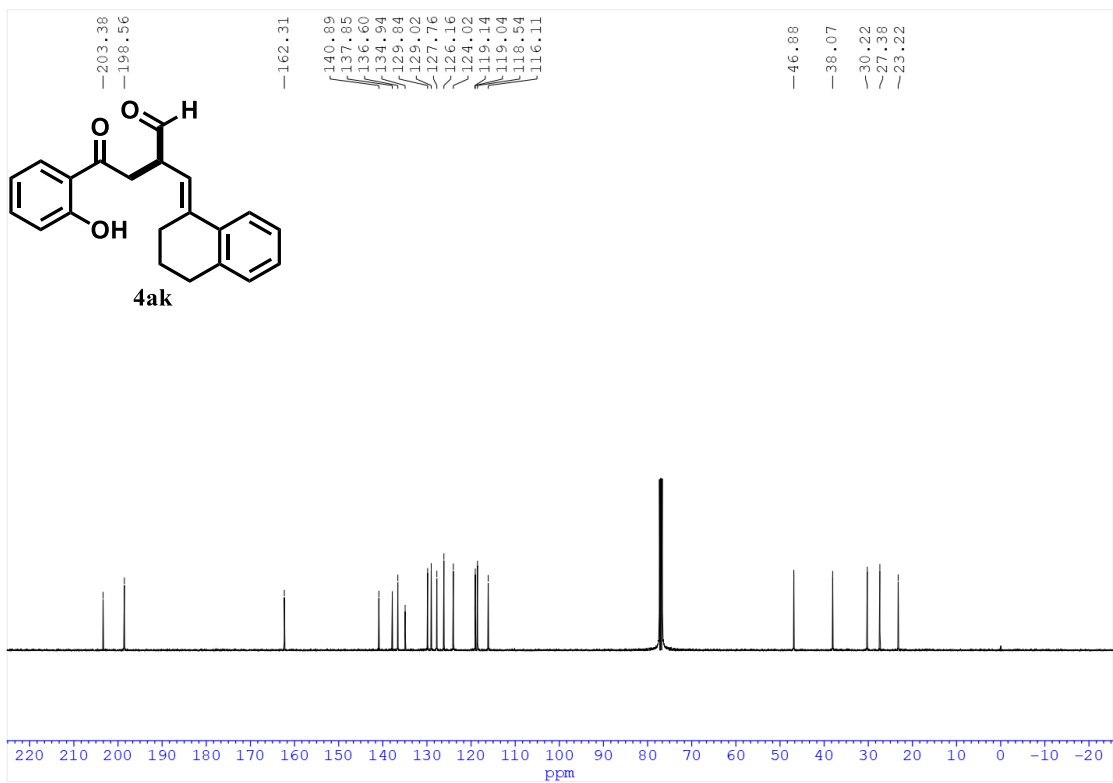

### NMR spectra for diverse transformations:

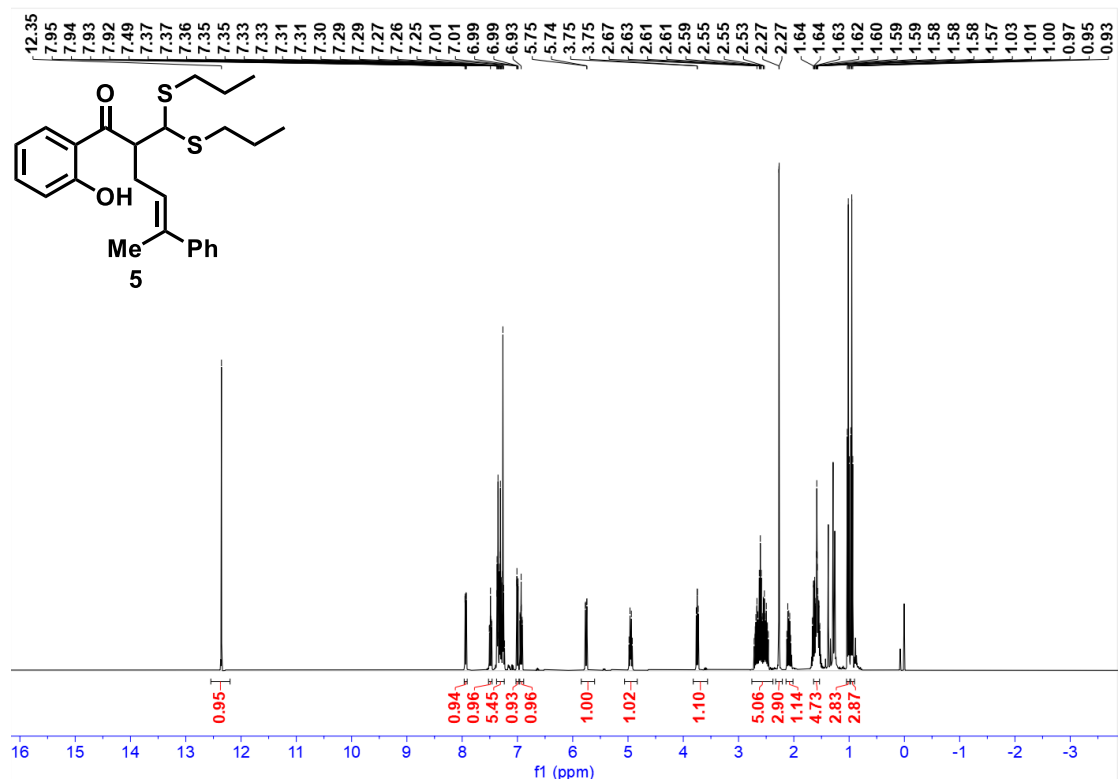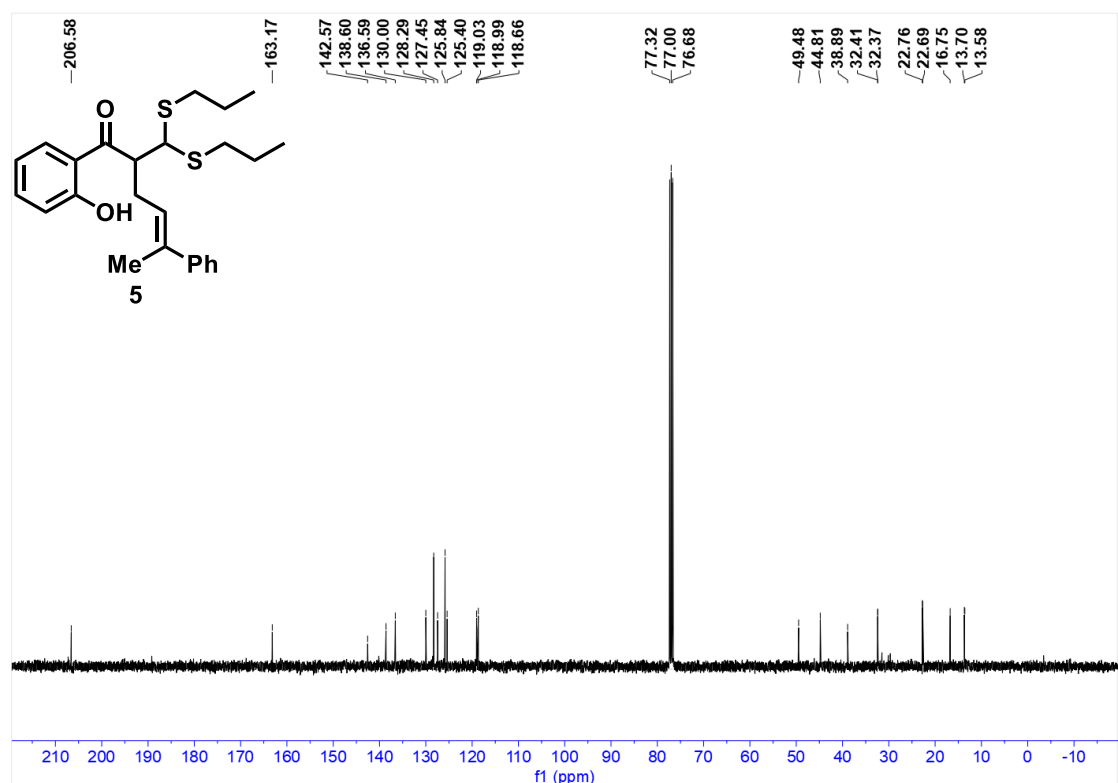

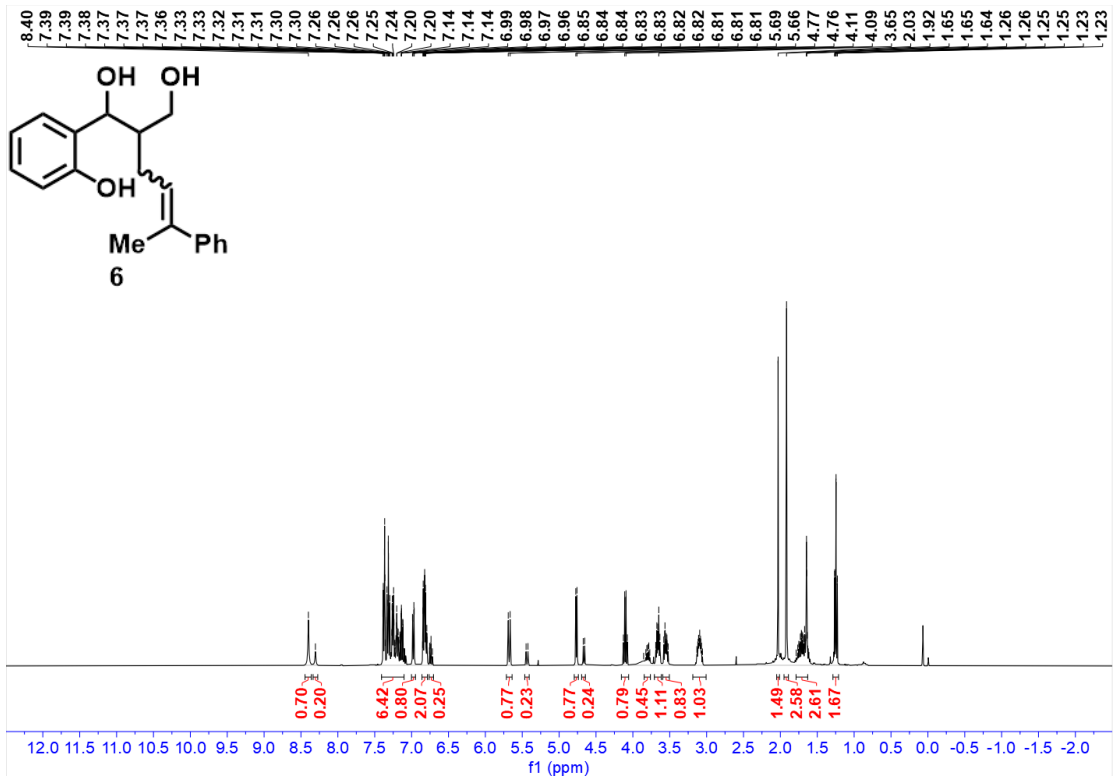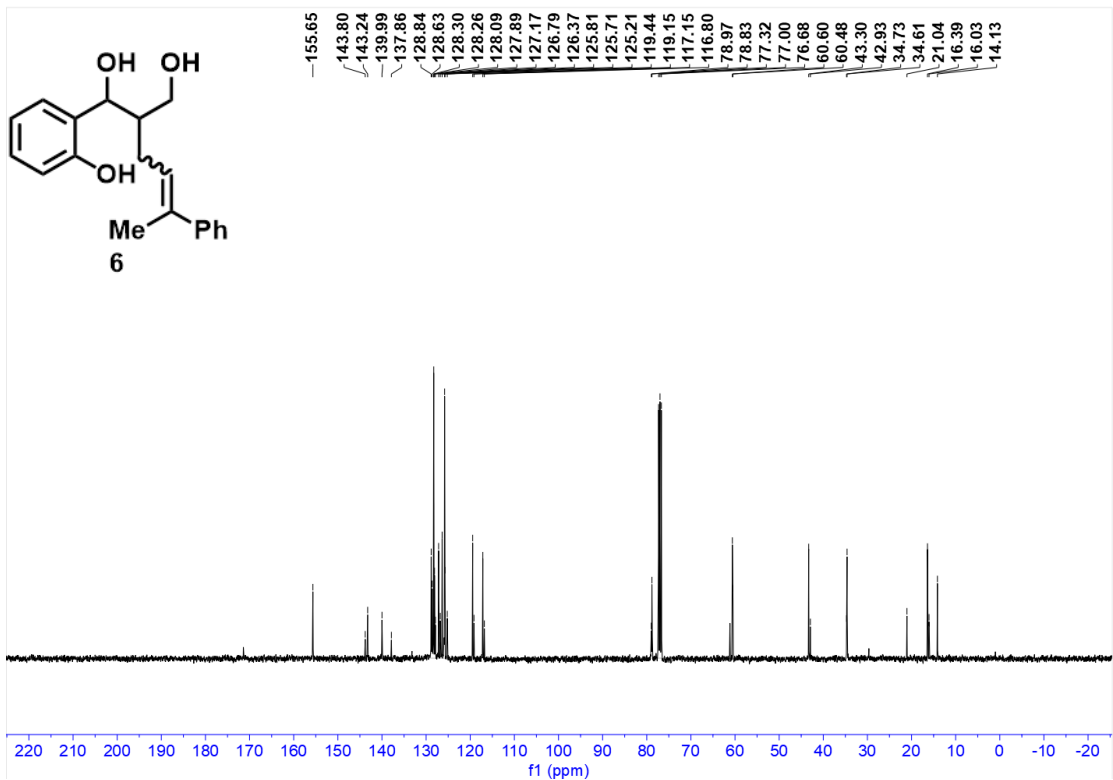

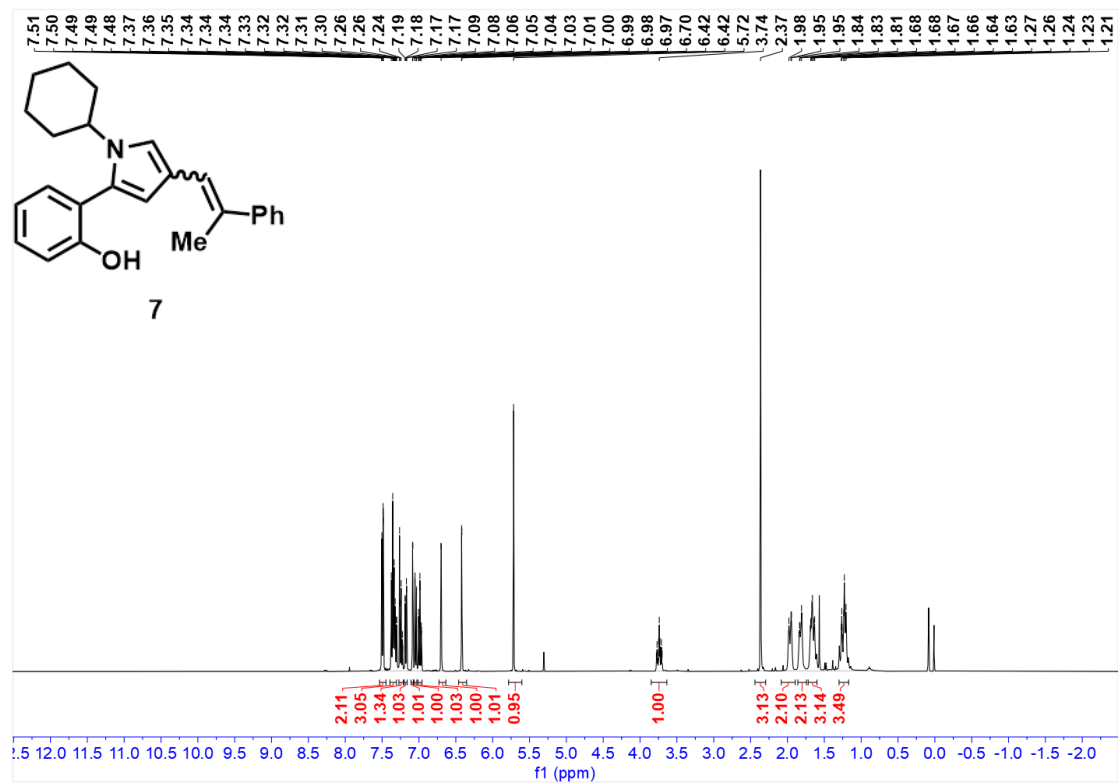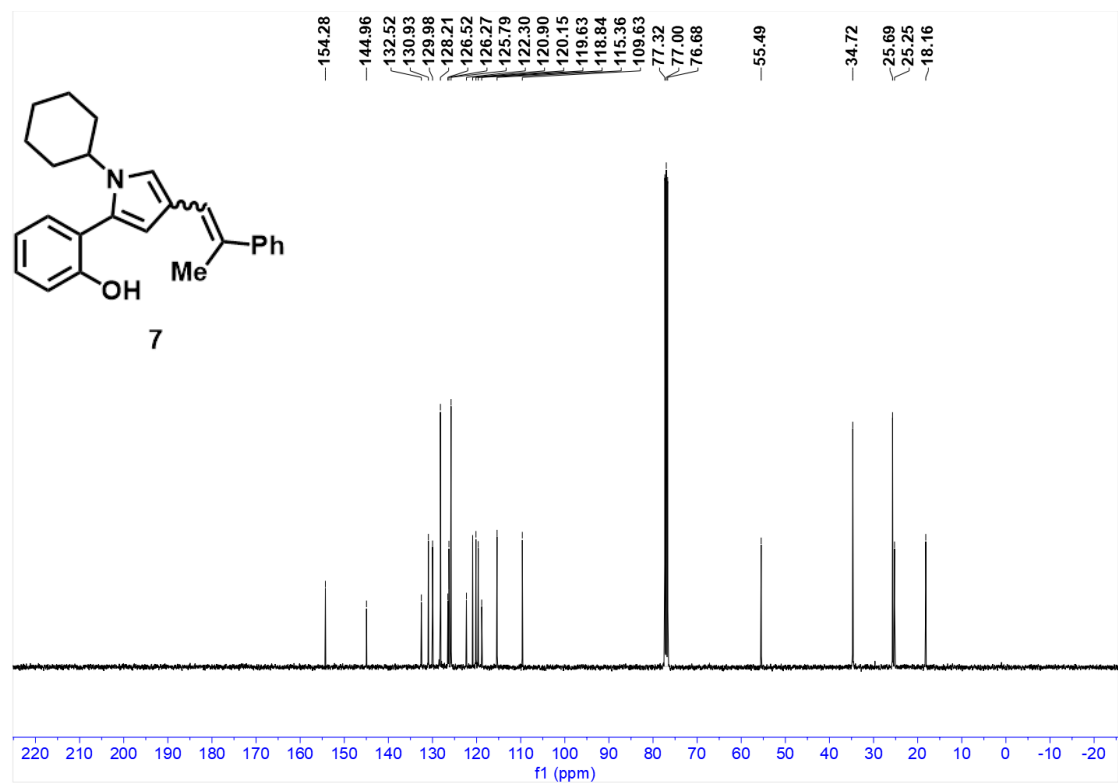

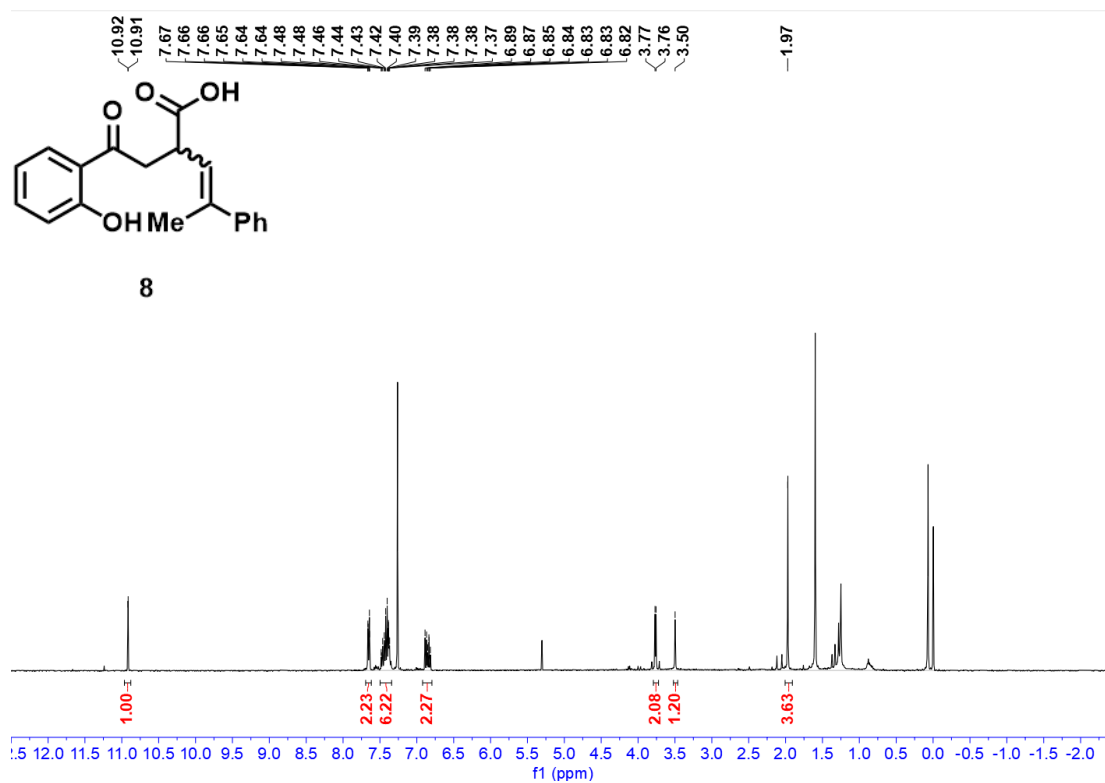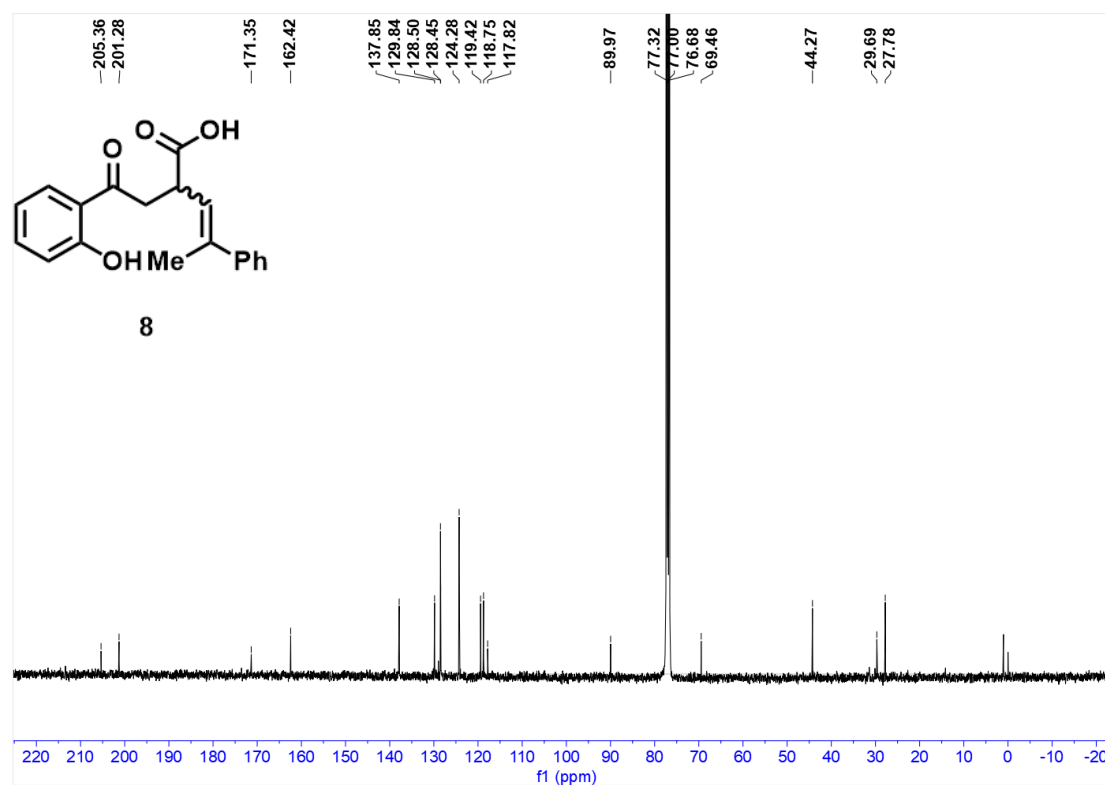

Supplement: d3qo00559c1.pdf [file d3qo00559c1.pdf]
